# Supplementary material for: Dimensionality reduction of COSMO-RS molecular descriptor using functional principal component analysis (FPCA) for organic solvent mapping
Source: Royal Society of Chemistry journal article supplement (doi:10.1039/d5ra08246c), 2026-01-01
Supplement: d5ra08246c1.xlsx [file d5ra08246c1.xlsx]

## Sheet: Database
Name	CAS	Cluster	-3	-2.9	-2.8	-2.7	-2.6	-2.5	-2.4	-2.3	-2.2	-2.1	-2	-1.9	-1.8	-1.7	-1.6	-1.5	-1.4	-1.3	-1.2	-1.1	-1	-0.9	-0.8	-0.7	-0.6	-0.5	-0.4	-0.3	-0.2	-0.1	0	0.1	0.2	0.3	0.4	0.5	0.6	0.7	0.8	0.9	1	1.1	1.2	1.3	1.4	1.5	1.6
aceticacid	64-19-7	9	-124.348	-121.04	-117.239	-112.959	-108.212	-103.016	-97.389	-91.353	-84.935	-78.169	-71.095	-63.767	-56.253	-48.642	-41.048	-33.614	-26.515	-19.952	-14.136	-9.263	-5.479	-2.847	-1.332	-2.431	-4.184	-5.827	-7.339	-8.697	-9.869	-10.821	-11.518	-11.924	-12.006	-11.733	-11.076	-10.01	-8.514	-6.569	-4.161	-1.28	1.016	2.506	2.468	-0.417	-7.642	-20.149	-37.668
aceticanhydride	108-24-7	4	-62.457	-63.11	-63.209	-62.764	-61.786	-60.29	-58.291	-55.809	-52.866	-49.492	-45.72	-41.596	-37.175	-32.529	-27.747	-22.94	-18.244	-13.815	-9.824	-6.44	-3.811	-2.032	-1.134	-2.427	-4.328	-6.202	-8.029	-9.778	-11.406	-12.868	-14.114	-15.096	-15.767	-16.084	-16.01	-15.51	-14.555	-13.119	-11.182	-8.725	-5.841	-2.448	1.486	5.969	11.008	16.609	22.777
propanone	67-64-1	2	-244.554	-236.261	-227.411	-218.016	-208.089	-197.644	-186.697	-175.27	-163.384	-151.069	-138.359	-125.295	-111.934	-98.347	-84.636	-70.943	-57.473	-44.518	-32.472	-21.822	-13.078	-6.639	-2.639	-3.243	-5.131	-7.096	-9.079	-11.007	-12.806	-14.405	-15.736	-16.739	-17.361	-17.558	-17.295	-16.541	-15.271	-13.467	-11.111	-8.191	-4.699	-0.625	4.039	9.298	15.157	21.62	28.691
acetonitrile	75-05-8	4	-159.307	-154.057	-148.253	-141.908	-135.037	-127.658	-119.793	-111.468	-102.718	-93.583	-84.117	-74.389	-64.489	-54.53	-44.663	-35.075	-25.994	-17.683	-10.414	-4.436	0.077	3.063	4.591	3.427	1.474	-0.585	-2.734	-4.939	-7.153	-9.32	-11.378	-13.265	-14.92	-16.289	-17.32	-17.97	-18.201	-17.981	-17.282	-16.081	-14.852	-13.255	-11.177	-8.608	-5.537	-1.956	2.143
acetophenone	98-86-2	3	-199.116	-190.963	-182.325	-173.22	-163.668	-153.692	-143.318	-132.577	-121.508	-110.153	-98.572	-86.839	-75.054	-63.358	-51.94	-41.055	-31.021	-22.202	-14.949	-9.512	-5.958	-4.142	-3.756	-5.643	-7.946	-10.029	-11.868	-13.438	-14.713	-15.67	-16.286	-16.54	-16.411	-15.882	-14.936	-13.556	-11.73	-9.442	-6.681	-3.436	0.28	4.491	9.211	14.45	20.214	26.511	33.347
acetylacetone	123-54-6	4	-161.279	-156.526	-151.238	-145.429	-139.115	-132.313	-125.044	-117.331	-109.203	-100.693	-91.842	-82.7	-73.33	-63.817	-54.267	-44.824	-35.672	-27.041	-19.205	-12.454	-7.049	-3.162	-0.829	-1.819	-3.744	-5.688	-7.619	-9.494	-11.259	-12.859	-14.238	-15.344	-16.127	-16.545	-16.558	-16.136	-15.25	-13.876	-11.997	-9.596	-6.744	-3.377	0.527	4.977	9.976	15.529	21.639
ethanolamine	141-43-5	8	-636.47	-601.506	-566.036	-530.097	-493.74	-457.027	-420.044	-382.901	-345.745	-308.763	-272.194	-236.331	-201.513	-168.109	-136.494	-107.03	-80.087	-56.094	-35.596	-19.199	-7.328	0.093	3.726	2.368	-0.122	-2.545	-4.858	-7.011	-8.957	-10.651	-12.05	-13.114	-13.81	-14.109	-13.984	-13.415	-12.383	-10.873	-8.873	-6.372	-4.004	-1.507	1.15	3.846	6.411	8.615	10.157
aniline	62-53-3	6	-226.345	-214.903	-202.89	-190.315	-177.193	-163.541	-149.386	-134.764	-119.733	-104.381	-88.844	-73.338	-58.189	-43.864	-30.97	-20.165	-11.968	-6.549	-3.645	-2.698	-3.072	-4.222	-5.746	-7.753	-9.615	-11.152	-12.38	-13.311	-13.956	-14.323	-14.42	-14.251	-13.817	-13.119	-12.153	-10.914	-9.396	-7.59	-5.489	-3.082	-1.246	0.415	2.031	3.576	5.033	6.4	7.688
anisole	100-66-3	6	9.765	8.155	7.075	6.493	6.372	6.661	7.297	8.203	9.282	10.423	11.499	12.379	12.935	13.06	12.682	11.772	10.351	8.483	6.261	3.795	1.195	-1.435	-4.008	-6.787	-9.346	-11.532	-13.348	-14.796	-15.878	-16.591	-16.929	-16.887	-16.455	-15.624	-14.381	-12.715	-10.611	-8.057	-5.038	-1.543	2.432	6.906	11.892	17.401	23.443	30.028	37.165
benzaldehyde	100-52-7	3	-157.388	-151.36	-144.861	-137.91	-130.525	-122.729	-114.547	-106.008	-97.147	-88.009	-78.651	-69.146	-59.596	-50.133	-40.935	-32.225	-24.271	-17.358	-11.742	-7.593	-4.944	-3.677	-3.559	-5.453	-7.71	-9.747	-11.544	-13.079	-14.33	-15.277	-15.898	-16.174	-16.087	-15.619	-14.755	-13.479	-11.777	-9.635	-7.042	-3.984	-0.486	3.485	7.945	12.905	18.373	24.358	30.868
benzene	71-43-2	5	196.245	181.192	166.744	152.897	139.646	126.989	114.919	103.433	92.524	82.187	72.415	63.201	54.537	46.416	38.828	31.764	25.215	19.171	13.621	8.555	3.963	-0.166	-3.84	-7.069	-9.861	-12.222	-14.158	-15.672	-16.768	-17.446	-17.704	-17.539	-16.947	-15.923	-14.458	-12.545	-10.174	-7.336	-4.021	-0.218	4.083	8.891	14.217	20.069	26.458	33.39	40.873
benzonitrile	100-47-0	6	-104.559	-101.312	-97.539	-93.255	-88.475	-83.221	-77.519	-71.402	-64.915	-58.116	-51.08	-43.91	-36.734	-29.717	-23.058	-16.982	-11.715	-7.459	-4.342	-2.397	-1.551	-1.642	-2.46	-4.588	-6.886	-8.953	-10.771	-12.326	-13.601	-14.577	-15.24	-15.571	-15.557	-15.182	-14.431	-13.292	-11.751	-9.796	-7.416	-4.599	-1.527	1.926	5.804	10.117	14.871	20.075	25.737
benzylalcohol	100-51-6	7	-230.54	-219.575	-208.082	-196.076	-183.572	-170.593	-157.162	-143.314	-129.092	-114.556	-99.791	-84.927	-70.151	-55.741	-42.091	-29.708	-19.165	-10.96	-5.339	-2.184	-1.073	-1.439	-2.739	-5.215	-7.712	-9.874	-11.699	-13.178	-14.305	-15.073	-15.473	-15.496	-15.132	-14.371	-13.204	-11.619	-9.608	-7.161	-4.269	-0.923	2.128	4.889	7.113	8.266	7.661	4.583	-1.485
bromobenzene	108-86-1	5	214.763	198.722	183.289	168.463	154.241	140.62	127.599	115.175	103.345	92.106	81.454	71.385	61.895	52.979	44.632	36.848	29.622	22.947	16.816	11.221	6.155	1.608	-2.427	-5.96	-9	-11.556	-13.638	-15.255	-16.414	-17.125	-17.394	-17.227	-16.63	-15.606	-14.156	-12.283	-9.984	-7.259	-4.102	-0.51	3.447	7.822	12.637	17.899	23.618	29.801	36.458
1-bromobutane	109-65-9	5	199.673	184.666	170.256	156.437	143.205	130.552	118.474	106.962	96.01	85.611	75.755	66.436	57.645	49.373	41.612	34.354	27.589	21.311	15.512	10.185	5.324	0.926	-3.016	-6.503	-9.536	-12.118	-14.246	-15.92	-17.136	-17.891	-18.181	-18.001	-17.345	-16.206	-14.58	-12.46	-9.839	-6.711	-3.07	1.09	5.762	10.959	16.687	22.953	29.759	37.111	45.011
bromoethane	74-96-4	5	189.337	174.526	160.335	146.762	133.8	121.447	109.696	98.541	87.976	77.994	68.585	59.741	51.452	43.707	36.494	29.801	23.614	17.919	12.701	7.947	3.641	-0.232	-3.684	-6.729	-9.377	-11.638	-13.517	-15.019	-16.147	-16.898	-17.268	-17.253	-16.842	-16.027	-14.796	-13.135	-11.033	-8.475	-5.448	-1.938	2.043	6.521	11.513	17.028	23.077	29.667	36.807
1-butanol	71-36-3	7	-304.226	-291.241	-277.693	-263.593	-248.955	-233.796	-218.133	-201.989	-185.393	-168.379	-150.995	-133.302	-115.392	-97.4	-79.538	-62.133	-45.683	-30.875	-18.524	-9.339	-3.593	-0.968	-0.716	-3.268	-6.222	-8.85	-11.112	-12.971	-14.397	-15.361	-15.842	-15.821	-15.282	-14.214	-12.608	-10.457	-7.758	-4.507	-0.706	3.646	7.924	12.131	16.061	19.273	21.177	21.092	18.412
2-butanol	78-92-2	7	-304.564	-291.576	-278.023	-263.919	-249.278	-234.12	-218.464	-202.337	-185.768	-168.795	-151.464	-133.839	-116.006	-98.096	-80.307	-62.953	-46.509	-31.647	-19.177	-9.828	-3.92	-1.171	-0.848	-3.415	-6.396	-9.042	-11.315	-13.181	-14.611	-15.578	-16.062	-16.043	-15.508	-14.444	-12.845	-10.701	-8.011	-4.77	-0.979	3.363	7.655	11.918	15.981	19.456	21.831	22.504	20.91
butanone	78-93-3	3	-241.36	-233.273	-224.611	-215.386	-205.611	-195.302	-184.476	-173.155	-161.363	-149.126	-136.48	-123.467	-110.145	-96.589	-82.91	-69.267	-55.896	-43.127	-31.404	-21.249	-13.168	-7.485	-4.206	-5.126	-7.12	-9.084	-10.96	-12.686	-14.2	-15.443	-16.362	-16.911	-17.048	-16.739	-15.955	-14.674	-12.876	-10.544	-7.667	-4.233	-0.233	4.338	9.489	15.222	21.544	28.457	35.964
n-butylacetate	123-86-4	3	-181.728	-176.024	-169.791	-163.038	-155.776	-148.016	-139.772	-131.059	-121.896	-112.307	-102.325	-91.995	-81.38	-70.571	-59.703	-48.966	-38.628	-29.033	-20.587	-13.692	-8.642	-5.521	-4.17	-5.869	-8.236	-10.424	-12.384	-14.069	-15.433	-16.436	-17.039	-17.21	-16.921	-16.148	-14.87	-13.072	-10.737	-7.856	-4.417	-0.414	4.159	9.308	15.038	21.354	28.257	35.752	43.841
1-butylamine	109-73-9	1	-815.156	-779.032	-742.278	-704.899	-666.907	-628.312	-589.13	-549.38	-509.084	-468.273	-426.985	-385.268	-343.184	-300.815	-258.272	-215.718	-173.417	-131.863	-92.106	-56.342	-28.229	-10.935	-3.652	-4.778	-7.316	-9.695	-11.83	-13.65	-15.098	-16.131	-16.713	-16.818	-16.427	-15.527	-14.107	-12.162	-9.688	-6.684	-3.148	0.917	5.297	10.089	15.318	20.967	27.021	33.462	40.277
butyronitrile	109-74-0	3	-163.71	-158.591	-152.916	-146.698	-139.948	-132.684	-124.925	-116.696	-108.025	-98.953	-89.529	-79.819	-69.911	-59.925	-50.017	-40.391	-31.305	-23.056	-15.954	-10.269	-6.161	-3.64	-2.558	-3.99	-6.034	-8.007	-9.874	-11.592	-13.115	-14.397	-15.394	-16.065	-16.372	-16.283	-15.769	-14.806	-13.373	-11.453	-9.031	-6.096	-2.762	1.052	5.376	10.215	15.572	21.45	27.85
cs2	75-15-0	5	256.203	238.251	220.911	204.184	188.068	172.565	157.673	143.393	129.723	116.664	104.216	92.378	81.149	70.53	60.521	51.12	42.328	34.143	26.567	19.598	13.236	7.481	2.332	-2.212	-6.15	-9.483	-12.211	-14.336	-15.856	-16.774	-17.089	-16.802	-15.913	-14.422	-12.331	-9.64	-6.349	-2.459	2.031	7.118	12.804	19.087	25.966	33.442	41.515	50.182	59.445
ccl4	56-23-5	5	257.98	239.617	221.89	204.799	188.343	172.523	157.336	142.783	128.863	115.574	102.917	90.889	79.491	68.722	58.579	49.063	40.172	31.904	24.259	17.235	10.83	5.044	-0.125	-4.68	-8.621	-11.951	-14.671	-16.783	-18.289	-19.192	-19.492	-19.193	-18.297	-16.805	-14.719	-12.043	-8.777	-4.924	-0.487	4.533	10.135	16.315	23.073	30.407	38.315	46.796	55.849
chlorobenzene	108-90-7	5	215.452	199.22	183.605	168.603	154.214	140.435	127.264	114.699	102.736	91.373	80.607	70.433	60.848	51.847	43.426	35.579	28.3	21.584	15.424	9.811	4.74	0.2	-3.815	-7.316	-10.311	-12.81	-14.822	-16.357	-17.424	-18.031	-18.187	-17.898	-17.171	-16.01	-14.418	-12.398	-9.949	-7.071	-3.759	-0.011	4.104	8.637	13.611	19.032	24.909	31.252	38.068
1-chlorobutane	109-69-3	5	198.879	183.855	169.436	155.615	142.386	129.744	117.682	106.192	95.267	84.898	75.077	65.795	57.043	48.813	41.093	33.876	27.153	20.914	15.153	9.862	5.035	0.667	-3.246	-6.706	-9.714	-12.27	-14.373	-16.02	-17.207	-17.929	-18.18	-17.955	-17.246	-16.046	-14.348	-12.144	-9.428	-6.191	-2.427	1.87	6.704	12.081	18.009	24.492	31.536	39.145	47.322
chcl3	67-66-3	6	237.788	220.184	203.221	186.898	171.214	156.168	141.759	127.987	114.849	102.346	90.474	79.234	68.622	58.638	49.279	40.543	32.428	24.93	18.047	11.774	6.108	1.043	-3.426	-7.306	-10.605	-13.331	-15.496	-17.111	-18.192	-18.756	-18.823	-18.418	-17.566	-16.299	-14.651	-12.661	-10.369	-7.817	-5.047	-2.098	-0.931	-0.967	-1.983	-3.975	-6.838	-10.384	-14.386
1-chloropropane	540-54-5	5	194.755	179.778	165.417	151.667	138.522	125.978	114.026	102.662	91.876	81.661	72.008	62.908	54.35	46.324	38.819	31.824	25.328	19.32	13.789	8.723	4.114	-0.046	-3.767	-7.052	-9.908	-12.335	-14.336	-15.909	-17.05	-17.757	-18.022	-17.839	-17.2	-16.095	-14.517	-12.454	-9.898	-6.838	-3.266	0.827	5.445	10.599	16.297	22.547	29.353	36.723	44.661
2-chloropropane	75-29-6	5	186.413	171.813	157.833	144.469	131.713	119.562	108.007	97.042	86.658	76.847	67.597	58.899	50.741	43.111	35.994	29.378	23.248	17.59	12.39	7.634	3.308	-0.597	-4.094	-7.189	-9.888	-12.194	-14.109	-15.629	-16.752	-17.469	-17.773	-17.652	-17.096	-16.092	-14.626	-12.686	-10.259	-7.333	-3.894	0.067	4.563	9.602	15.194	21.347	28.068	35.364	43.241
3-hydroxytoluene	108-39-4	9	-1.571	-1.239	-0.455	0.743	2.305	4.166	6.241	8.427	10.599	12.61	14.304	15.53	16.157	16.102	15.339	13.909	11.907	9.463	6.722	3.828	0.907	-1.936	-4.616	-7.301	-9.687	-11.669	-13.253	-14.445	-15.248	-15.667	-15.706	-15.368	-14.656	-13.574	-12.128	-10.322	-8.163	-5.659	-2.822	0.338	1.269	-0.739	-6.884	-18.339	-35.077	-55.917	-79.347
cyclohexane	110-82-7	5	270.981	251.964	233.594	215.87	198.794	182.364	166.581	151.445	136.955	123.112	109.914	97.363	85.458	74.2	63.587	53.62	44.299	35.624	27.594	20.21	13.472	7.379	1.932	-2.869	-7.026	-10.536	-13.402	-15.622	-17.196	-18.126	-18.41	-18.048	-17.042	-15.39	-13.093	-10.151	-6.563	-2.33	2.548	8.072	14.241	21.055	28.515	36.62	45.371	54.767	64.809
cyclohexanol	108-93-0	7	-313.139	-300.001	-286.288	-272.01	-257.177	-241.804	-225.907	-209.508	-192.631	-175.311	-157.591	-139.531	-121.217	-102.777	-84.411	-66.434	-49.329	-33.794	-20.684	-10.793	-4.492	-1.51	-1.076	-3.616	-6.589	-9.23	-11.499	-13.357	-14.772	-15.717	-16.168	-16.108	-15.521	-14.394	-12.72	-10.491	-7.703	-4.354	-0.442	4.031	8.538	13.098	17.552	21.546	24.588	26.072	25.372
cyclohexanone	108-94-1	3	-262.087	-252.586	-242.555	-232.007	-220.953	-209.41	-197.394	-184.926	-172.03	-158.736	-145.078	-131.103	-116.867	-102.451	-87.965	-73.569	-59.497	-46.079	-33.761	-23.076	-14.544	-8.505	-4.974	-5.822	-7.793	-9.734	-11.581	-13.266	-14.723	-15.891	-16.713	-17.14	-17.132	-16.653	-15.675	-14.175	-12.134	-9.536	-6.37	-2.625	1.705	6.628	12.147	18.268	24.993	32.325	40.266
cyclohexene	110-83-8	5	162.977	152.436	142.297	132.533	123.119	114.026	105.229	96.704	88.43	80.389	72.57	64.965	57.575	50.405	43.467	36.776	30.354	24.223	18.408	12.937	7.834	3.125	-1.164	-5.148	-8.673	-11.67	-14.133	-16.053	-17.426	-18.243	-18.498	-18.187	-17.302	-15.838	-13.792	-11.157	-7.931	-4.109	0.313	5.337	10.967	17.205	24.054	31.515	39.592	48.285	57.596
cyclopentane	287-92-3	5	269.012	250.104	231.84	214.221	197.246	180.915	165.229	150.186	135.786	122.03	108.917	96.447	84.62	73.435	62.893	52.994	43.736	35.121	27.148	19.817	13.128	7.08	1.675	-3.089	-7.211	-10.691	-13.53	-15.726	-17.281	-18.195	-18.466	-18.096	-17.083	-15.429	-13.132	-10.193	-6.612	-2.389	2.477	7.986	14.138	20.932	28.37	36.451	45.175	54.543	64.555
cyclopentanone	120-92-3	3	-238.005	-229.772	-221.017	-211.749	-201.982	-191.728	-181.004	-169.827	-158.219	-146.207	-133.823	-121.108	-108.115	-94.92	-81.626	-68.385	-55.414	-43.018	-31.601	-21.643	-13.617	-7.848	-4.389	-5.166	-7.071	-8.98	-10.832	-12.56	-14.096	-15.375	-16.339	-16.934	-17.116	-16.847	-16.094	-14.833	-13.041	-10.702	-7.802	-4.33	-0.277	4.364	9.6	15.434	21.871	28.914	36.566
n-decane	124-18-5	5	269.237	250.345	232.097	214.49	197.526	181.204	165.524	150.485	136.088	122.333	109.219	96.747	84.916	73.727	63.179	53.272	44.006	35.381	27.398	20.056	13.355	7.295	1.877	-2.9	-7.036	-10.53	-13.383	-15.594	-17.164	-18.091	-18.377	-18.021	-17.022	-15.382	-13.099	-10.173	-6.605	-2.394	2.46	7.958	14.098	20.882	28.31	36.382	45.097	54.457	64.461
1,1'-oxybis-2-ethoxy-ethane	112-36-7	3	-416.395	-395.718	-374.761	-353.571	-332.201	-310.702	-289.124	-267.515	-245.918	-224.366	-202.893	-181.523	-160.291	-139.24	-118.452	-98.066	-78.331	-59.655	-42.65	-28.107	-16.803	-9.166	-5.013	-6.065	-8.297	-10.399	-12.315	-13.992	-15.376	-16.419	-17.077	-17.313	-17.093	-16.389	-15.177	-13.436	-11.151	-8.306	-4.891	-0.895	3.689	8.869	14.651	21.038	28.037	35.649	43.879
diglyme	111-96-6	3	-349.747	-334.664	-319.24	-303.492	-287.43	-271.066	-254.407	-237.462	-220.239	-202.746	-184.997	-167.013	-148.825	-130.488	-112.093	-93.786	-75.808	-58.536	-42.527	-28.505	-17.235	-9.244	-4.557	-5.281	-7.33	-9.326	-11.217	-12.943	-14.446	-15.67	-16.563	-17.078	-17.174	-16.815	-15.973	-14.621	-12.738	-10.306	-7.311	-3.74	0.418	5.17	10.523	16.485	23.06	30.252	38.066
dibenzylether	103-50-4	3	-201.719	-191.602	-180.975	-169.852	-158.252	-146.195	-133.708	-120.826	-107.599	-94.096	-80.425	-66.745	-53.295	-40.424	-28.595	-18.36	-10.246	-4.579	-1.356	-0.235	-0.687	-2.163	-4.203	-6.931	-9.535	-11.772	-13.639	-15.132	-16.244	-16.969	-17.299	-17.226	-16.741	-15.834	-14.495	-12.714	-10.478	-7.779	-4.605	-0.946	3.208	7.867	13.04	18.736	24.962	31.726	39.035
di-n-butylether	142-96-1	3	-296.844	-283.973	-270.543	-256.562	-242.04	-226.988	-211.421	-195.355	-178.812	-161.82	-144.418	-126.666	-108.655	-90.53	-72.538	-55.077	-38.771	-24.481	-13.162	-5.499	-1.522	-0.574	-1.677	-4.931	-8.309	-11.232	-13.672	-15.609	-17.022	-17.894	-18.211	-17.96	-17.132	-15.718	-13.709	-11.1	-7.885	-4.059	0.381	5.438	11.117	17.418	24.345	31.9	40.083	48.897	58.343
1,3-dichlorobenzene	541-73-1	5	227.047	210.263	194.092	178.535	163.589	149.254	135.527	122.409	109.896	97.987	86.681	75.974	65.865	56.351	47.428	39.095	31.346	24.179	17.589	11.571	6.12	1.23	-3.104	-6.89	-10.134	-12.844	-15.029	-16.696	-17.855	-18.516	-18.688	-18.38	-17.602	-16.363	-14.672	-12.537	-9.966	-6.964	-3.536	0.314	4.311	8.604	13.238	18.211	23.526	29.183	35.189
1,2-dichlorobenzene	95-50-1	5	224.034	207.418	191.415	176.022	161.238	147.063	133.493	120.528	108.166	96.404	85.241	74.673	64.698	55.313	46.515	38.3	30.664	23.603	17.112	11.186	5.819	1.006	-3.26	-6.986	-10.179	-12.848	-14.999	-16.643	-17.786	-18.438	-18.609	-18.306	-17.537	-16.311	-14.635	-12.515	-9.957	-6.963	-3.538	0.318	4.453	8.954	13.85	19.144	24.838	30.94	37.454
1,2-dichloroethane	107-06-2	6	195.199	179.589	164.614	150.27	136.557	123.471	111.011	99.174	87.957	77.358	67.371	57.993	49.22	41.045	33.464	26.468	20.05	14.202	8.912	4.17	-0.038	-3.726	-6.911	-9.609	-11.84	-13.626	-14.987	-15.947	-16.528	-16.752	-16.641	-16.213	-15.484	-14.465	-13.163	-11.582	-9.717	-7.562	-5.102	-2.323	0.305	3.094	6.166	9.546	13.26	17.337	21.801
1,1-dichloroethane	75-34-3	6	209.739	193.563	178.02	163.109	148.825	135.169	122.136	109.724	97.931	86.751	76.183	66.221	56.86	48.097	39.924	32.335	25.324	18.883	13.003	7.676	2.892	-1.361	-5.093	-8.318	-11.047	-13.294	-15.073	-16.399	-17.285	-17.745	-17.793	-17.442	-16.702	-15.584	-14.097	-12.246	-10.036	-7.468	-4.543	-1.258	1.824	4.958	8.23	11.62	15.121	18.726	22.441
1,1-dichloroethylene	75-35-4	5	242.998	225.251	208.144	191.675	175.844	160.65	146.09	132.165	118.873	106.211	94.179	82.774	71.994	61.838	52.303	43.385	35.082	27.391	20.308	13.83	7.951	2.668	-2.026	-6.135	-9.665	-12.624	-15.019	-16.856	-18.145	-18.893	-19.111	-18.807	-17.991	-16.673	-14.862	-12.57	-9.804	-6.573	-2.887	1.249	5.467	9.944	14.734	19.825	25.209	30.883	36.847
cis-1,2-dichloroethene	156-59-2	6	224.357	207.397	191.072	175.382	160.325	145.901	132.106	118.941	106.404	94.492	83.205	72.538	62.491	53.061	44.244	36.037	28.436	21.436	15.033	9.221	3.993	-0.657	-4.74	-8.263	-11.238	-13.677	-15.594	-17.004	-17.924	-18.372	-18.369	-17.935	-17.093	-15.865	-14.273	-12.34	-10.083	-7.521	-4.667	-1.528	0.917	3.147	5.335	7.49	9.64	11.824	14.091
ch2cl2	75-09-2	6	210.785	194.267	178.394	163.165	148.578	134.632	121.325	108.655	96.621	85.22	74.451	64.309	54.794	45.9	37.624	29.963	22.91	16.46	10.606	5.341	0.657	-3.459	-7.016	-10.028	-12.512	-14.484	-15.965	-16.977	-17.545	-17.696	-17.459	-16.865	-15.944	-14.727	-13.243	-11.515	-9.565	-7.406	-5.046	-2.483	-1.046	-0.029	0.846	1.626	2.376	3.167	4.076
diethylamine	109-89-7	1	-762.784	-729.135	-694.85	-659.933	-624.391	-588.235	-551.475	-514.126	-476.209	-437.751	-398.788	-359.368	-319.559	-279.454	-239.183	-198.946	-159.063	-120.119	-83.274	-50.736	-25.766	-10.716	-4.484	-5.907	-8.583	-11.026	-13.167	-14.948	-16.32	-17.243	-17.684	-17.62	-17.029	-15.898	-14.214	-11.97	-9.16	-5.779	-1.825	2.702	7.716	13.253	19.324	25.917	33.021	40.625	48.714
diethylcarbonate	105-58-8	3	-112.425	-110.053	-107.2	-103.87	-100.066	-95.794	-91.064	-85.888	-80.283	-74.274	-67.895	-61.192	-54.228	-47.092	-39.9	-32.807	-26.01	-19.739	-14.247	-9.767	-6.47	-4.422	-3.561	-5.214	-7.454	-9.541	-11.442	-13.117	-14.526	-15.629	-16.386	-16.761	-16.722	-16.238	-15.285	-13.838	-11.88	-9.393	-6.363	-2.779	1.371	6.093	11.396	17.287	23.769	30.849	38.529
diethyleneglycol	111-46-6	8	-331.536	-316.965	-301.94	-286.476	-270.588	-254.298	-237.624	-220.594	-203.234	-185.58	-167.676	-149.576	-131.357	-113.122	-95.02	-77.272	-60.197	-44.244	-29.989	-18.062	-8.979	-2.925	0.337	-0.809	-3.005	-5.122	-7.123	-8.964	-10.6	-11.986	-13.078	-13.833	-14.215	-14.191	-13.731	-12.811	-11.408	-9.506	-7.089	-4.146	-1.096	2.11	5.363	8.377	10.724	11.798	10.86
diethylether	60-29-7	3	-297.577	-286.781	-275.363	-263.33	-250.693	-237.461	-223.649	-209.274	-194.355	-178.919	-163	-146.642	-129.908	-112.892	-95.734	-78.654	-61.995	-46.271	-32.183	-20.535	-11.989	-6.757	-4.47	-6.308	-8.949	-11.335	-13.418	-15.153	-16.498	-17.415	-17.87	-17.834	-17.283	-16.194	-14.551	-12.338	-9.543	-6.156	-2.167	2.429	7.641	13.471	19.925	27.006	34.718	43.062	52.042
diisopropylether	108-20-3	3	-386.567	-370.719	-354.325	-337.392	-319.924	-301.926	-283.408	-264.378	-244.852	-224.844	-204.379	-183.49	-162.222	-140.652	-118.903	-97.189	-75.888	-55.638	-37.43	-22.517	-11.969	-6.027	-3.916	-6.056	-8.892	-11.424	-13.602	-15.385	-16.732	-17.612	-17.997	-17.862	-17.189	-15.961	-14.165	-11.79	-8.826	-5.267	-1.106	3.661	9.04	15.034	21.645	28.876	36.729	45.207	54.311
1,2-dimethoxyethane	110-71-4	3	-303.335	-292.65	-281.377	-269.524	-257.101	-244.118	-230.586	-216.519	-201.934	-186.852	-171.298	-155.308	-138.929	-122.232	-105.321	-88.358	-71.595	-55.417	-40.378	-27.188	-16.585	-9.079	-4.705	-5.525	-7.609	-9.627	-11.526	-13.248	-14.734	-15.93	-16.785	-17.251	-17.289	-16.863	-15.944	-14.507	-12.531	-9.998	-6.894	-3.207	1.074	5.956	11.447	17.552	24.277	31.626	39.602
n,n-dimethylacetamide	127-19-5	2	-410.052	-394.288	-377.991	-361.173	-343.848	-326.031	-307.737	-288.981	-269.781	-250.154	-230.119	-209.699	-188.921	-167.819	-146.447	-124.889	-103.295	-81.931	-61.264	-42.073	-25.481	-12.722	-4.558	-4.137	-5.8	-7.665	-9.629	-11.581	-13.418	-15.045	-16.382	-17.361	-17.928	-18.039	-17.659	-16.761	-15.324	-13.33	-10.766	-7.622	-3.889	0.439	5.368	10.903	17.048	23.805	31.178
n,n-dimethylaniline	121-69-7	5	165.613	152.965	140.813	129.157	117.996	107.329	97.153	87.466	78.265	69.543	61.296	53.515	46.193	39.321	32.889	26.886	21.301	16.123	11.341	6.945	2.925	-0.726	-4.016	-6.993	-9.617	-11.871	-13.754	-15.262	-16.39	-17.131	-17.473	-17.407	-16.919	-15.998	-14.629	-12.8	-10.497	-7.709	-4.422	-0.625	3.692	8.538	13.924	19.856	26.343	33.391	41.007
3,3-dimethyl-2-butanone	75-97-8	3	-230.827	-222.506	-213.666	-204.32	-194.483	-184.17	-173.4	-162.193	-150.572	-138.566	-126.21	-113.547	-100.639	-87.571	-74.467	-61.509	-48.96	-37.185	-26.641	-17.827	-11.153	-6.799	-4.628	-6.047	-8.298	-10.417	-12.348	-14.034	-15.422	-16.462	-17.111	-17.331	-17.089	-16.358	-15.116	-13.344	-11.028	-8.154	-4.713	-0.696	3.901	9.086	14.863	21.235	28.205	35.777	43.952
dimethylformamide	68-12-2	2	-370.218	-355.77	-340.839	-325.44	-309.59	-293.303	-276.595	-259.483	-241.981	-224.107	-205.877	-187.311	-168.432	-149.273	-129.884	-110.351	-90.822	-71.557	-53	-35.856	-21.097	-9.752	-2.453	-2.234	-3.99	-5.98	-8.105	-10.258	-12.333	-14.234	-15.875	-17.185	-18.105	-18.588	-18.595	-18.098	-17.072	-15.499	-13.364	-10.657	-7.371	-3.499	0.968	6.034	11.703	17.977	24.86
2,4-dimethylpyridine	108-47-4	2	-570.37	-544.965	-519.029	-492.572	-465.601	-438.128	-410.164	-381.725	-352.827	-323.492	-293.746	-263.626	-233.18	-202.483	-171.652	-140.892	-110.59	-81.473	-54.849	-32.666	-16.847	-7.899	-4.425	-6.031	-8.496	-10.749	-12.741	-14.431	-15.779	-16.753	-17.325	-17.469	-17.167	-16.399	-15.151	-13.41	-11.164	-8.405	-5.124	-1.312	3.033	7.92	13.355	19.343	25.887	32.994	40.665
2,6-dimethylpyridine	108-48-5	2	-554.042	-529.551	-504.503	-478.901	-452.754	-426.068	-398.854	-371.124	-342.895	-314.187	-285.026	-255.449	-225.505	-195.271	-164.871	-134.528	-104.662	-76.079	-50.204	-29.083	-14.544	-6.773	-4.126	-6.019	-8.604	-10.925	-12.944	-14.625	-15.94	-16.862	-17.368	-17.44	-17.061	-16.216	-14.894	-13.083	-10.775	-7.961	-4.633	-0.786	3.581	8.478	13.911	19.883	26.401	33.468	41.087
dimethylsulfoxide	67-68-5	4	-472.797	-454.105	-434.847	-415.031	-394.664	-373.754	-352.311	-330.343	-307.864	-284.886	-261.425	-237.502	-213.14	-188.377	-163.264	-137.886	-112.394	-87.069	-62.439	-39.461	-19.64	-4.751	4.135	4.141	1.805	-0.87	-3.745	-6.687	-9.571	-12.288	-14.748	-16.88	-18.625	-19.939	-20.787	-21.141	-20.981	-20.291	-19.056	-17.266	-15.107	-12.445	-9.239	-5.485	-1.18	3.678	9.092
2,6-dimethyl-4-heptanone	108-83-8	3	-186.439	-179.845	-172.745	-165.147	-157.063	-148.502	-139.476	-130.001	-120.094	-109.779	-99.091	-88.078	-76.816	-65.415	-54.046	-42.956	-32.49	-23.084	-15.213	-9.28	-5.478	-3.706	-3.606	-5.965	-8.72	-11.179	-13.299	-15.04	-16.367	-17.249	-17.66	-17.577	-16.982	-15.858	-14.193	-11.976	-9.198	-5.853	-1.934	2.563	7.642	13.306	19.559	26.402	33.836	41.864	50.487
2,4-dimethyl-3-pentanone	565-80-0	3	-182.679	-177.381	-171.528	-165.127	-158.187	-150.714	-142.721	-134.217	-125.218	-115.742	-105.816	-95.476	-84.777	-73.803	-62.68	-51.598	-40.828	-30.743	-21.795	-14.454	-9.084	-5.806	-4.452	-6.222	-8.656	-10.898	-12.896	-14.597	-15.952	-16.918	-17.455	-17.531	-17.117	-16.19	-14.729	-12.719	-10.146	-6.999	-3.269	1.051	5.968	11.486	17.61	24.343	31.688	39.648	48.224
dioxane	123-91-1	3	-265.065	-256.31	-246.962	-237.026	-226.511	-215.425	-203.781	-191.591	-178.872	-165.643	-151.932	-137.774	-123.218	-108.336	-93.235	-78.076	-63.102	-48.669	-35.269	-23.507	-13.997	-7.163	-3.06	-3.857	-5.89	-7.882	-9.792	-11.573	-13.174	-14.543	-15.629	-16.385	-16.769	-16.741	-16.269	-15.324	-13.881	-11.92	-9.424	-6.377	-2.767	1.416	6.18	11.534	17.484	24.034	31.19
diphenylether	101-84-8	5	133.591	125.92	118.448	111.125	103.908	96.762	89.661	82.59	75.551	68.554	61.625	54.795	48.102	41.586	35.287	29.243	23.488	18.051	12.959	8.231	3.882	-0.074	-3.63	-6.863	-9.684	-12.062	-14.004	-15.514	-16.598	-17.257	-17.494	-17.309	-16.702	-15.671	-14.212	-12.321	-9.993	-7.22	-3.996	-0.313	3.81	8.397	13.465	19.02	25.071	31.627	38.695
di-n-propylether	111-43-3	3	-290.951	-279.035	-266.536	-253.462	-239.823	-225.629	-210.893	-195.632	-179.867	-163.624	-146.943	-129.877	-112.507	-94.964	-77.459	-60.333	-44.12	-29.575	-17.597	-8.944	-3.864	-1.933	-2.297	-5.264	-8.5	-11.317	-13.686	-15.579	-16.973	-17.848	-18.186	-17.973	-17.195	-15.841	-13.903	-11.371	-8.24	-4.503	-0.157	4.805	10.384	16.584	23.409	30.86	38.939	47.649	56.99
1,3-dimethyl-2-imidazolidinone	80-73-9	2	-340.949	-329.442	-317.317	-304.579	-291.232	-277.28	-262.73	-247.589	-231.864	-215.568	-198.715	-181.324	-163.423	-145.057	-126.292	-107.245	-88.109	-69.219	-51.118	-34.627	-20.784	-10.541	-4.287	-4.45	-6.269	-8.175	-10.087	-11.92	-13.595	-15.036	-16.18	-16.969	-17.356	-17.302	-16.774	-15.746	-14.196	-12.107	-9.464	-6.255	-2.471	1.896	6.854	12.408	18.562	25.321	32.688
1,3-dimethyltetrahydropyrimidin-2(1h)-one	7226-23-5	2	-413.401	-398.57	-383.127	-367.073	-350.413	-333.152	-315.293	-296.844	-277.811	-258.206	-238.038	-217.325	-196.09	-174.367	-152.211	-129.721	-107.071	-84.583	-62.838	-42.8	-25.824	-13.276	-5.756	-5.679	-7.432	-9.273	-11.108	-12.844	-14.396	-15.686	-16.65	-17.232	-17.388	-17.081	-16.281	-14.964	-13.111	-10.707	-7.739	-4.196	-0.072	4.642	9.951	15.86	22.372	29.492	37.222
ethanol	64-17-5	7	-328.171	-314.358	-299.971	-285.022	-269.527	-253.503	-236.971	-219.958	-202.494	-184.617	-166.374	-147.83	-129.069	-110.212	-91.439	-73.022	-55.373	-39.084	-24.914	-13.644	-5.786	-1.314	0.338	-1.656	-4.346	-6.812	-9.008	-10.89	-12.418	-13.554	-14.269	-14.534	-14.327	-13.63	-12.428	-10.708	-8.464	-5.687	-2.374	1.476	5.133	8.643	11.818	14.226	15.308	14.447	11.114
ethylacetate	141-78-6	3	-184.877	-179.284	-173.16	-166.517	-159.363	-151.71	-143.571	-134.961	-125.899	-116.408	-106.519	-96.27	-85.72	-74.946	-64.063	-53.234	-42.685	-32.718	-23.702	-16.038	-10.069	-5.985	-3.751	-5.01	-7.141	-9.184	-11.092	-12.812	-14.295	-15.49	-16.351	-16.835	-16.905	-16.529	-15.68	-14.333	-12.468	-10.07	-7.125	-3.62	0.451	5.098	10.327	16.146	22.558	29.568	37.179
ethylbenzoate	93-89-0	3	-104.384	-102.057	-99.174	-95.741	-91.765	-87.256	-82.228	-76.698	-70.695	-64.256	-57.434	-50.309	-42.988	-35.621	-28.408	-21.6	-15.485	-10.356	-6.456	-3.911	-2.701	-2.661	-3.534	-5.976	-8.597	-10.907	-12.886	-14.513	-15.769	-16.637	-17.1	-17.143	-16.753	-15.916	-14.621	-12.857	-10.615	-7.886	-4.661	-0.932	3.3	8.047	13.317	19.116	25.449	32.323	39.742
ethylformate	109-94-4	3	-133.833	-130.459	-126.559	-122.146	-117.234	-111.838	-105.975	-99.665	-92.931	-85.804	-78.319	-70.524	-62.483	-54.281	-46.032	-37.89	-30.053	-22.761	-16.286	-10.893	-6.789	-4.072	-2.698	-4.112	-6.215	-8.213	-10.073	-11.757	-13.224	-14.432	-15.341	-15.912	-16.111	-15.907	-15.274	-14.188	-12.629	-10.582	-8.032	-4.967	-1.569	2.273	6.593	11.391	16.664	22.41	28.624
ethylpropionate	105-37-3	3	-176.683	-171.116	-165.053	-158.503	-151.474	-143.976	-136.022	-127.624	-118.8	-109.572	-99.967	-90.029	-79.813	-69.406	-58.929	-48.561	-38.545	-29.203	-20.912	-14.059	-8.94	-5.668	-4.131	-5.724	-8.03	-10.175	-12.112	-13.797	-15.182	-16.226	-16.89	-17.138	-16.94	-16.268	-15.101	-13.42	-11.206	-8.448	-5.133	-1.251	3.205	8.242	13.867	20.085	26.899	34.314	42.332
1,2-diaminoethane	107-15-3	2	-807.562	-771.186	-734.221	-696.674	-658.554	-619.875	-580.653	-540.908	-500.666	-459.964	-418.844	-377.366	-335.603	-293.657	-251.661	-209.809	-168.395	-127.927	-89.362	-54.516	-26.284	-7.431	1.969	1.666	-0.654	-3.065	-5.477	-7.805	-9.971	-11.908	-13.559	-14.876	-15.819	-16.356	-16.462	-16.116	-15.299	-13.999	-12.203	-9.903	-7.532	-4.831	-1.716	1.81	5.745	10.088	14.838
glycol	107-21-1	8	-288.194	-275.854	-263.041	-249.762	-236.027	-221.845	-207.234	-192.212	-176.803	-161.041	-144.97	-128.648	-112.158	-95.619	-79.201	-63.148	-47.805	-33.63	-21.172	-10.974	-3.416	1.438	3.874	2.468	0.166	-2.034	-4.103	-6.006	-7.705	-9.16	-10.334	-11.19	-11.695	-11.817	-11.531	-10.813	-9.643	-8.003	-5.881	-3.265	-1.289	0.233	1.136	0.957	-0.842	-4.77	-11.163
fluorobenzene	462-06-6	5	209.032	193.097	177.779	163.077	148.989	135.511	122.642	110.378	98.715	87.651	77.18	67.298	58	49.281	41.135	33.555	26.535	20.066	14.141	8.75	3.885	-0.464	-4.308	-7.656	-10.52	-12.909	-14.834	-16.305	-17.33	-17.919	-18.077	-17.811	-17.124	-16.02	-14.497	-12.556	-10.193	-7.403	-4.18	-0.517	3.52	7.985	12.901	18.277	24.124	30.452	37.269
formamide	75-12-7	10	-301.476	-288.75	-275.532	-261.836	-247.675	-233.062	-218.014	-202.547	-186.681	-170.437	-153.844	-136.938	-119.772	-102.424	-85.013	-67.733	-50.881	-34.906	-20.424	-8.156	1.257	7.522	10.836	9.874	7.846	5.776	3.694	1.634	-0.367	-2.276	-4.058	-5.683	-7.121	-8.347	-9.337	-10.07	-10.524	-10.683	-10.528	-10.045	-10.621	-11.596	-12.751	-14.114	-15.694	-17.481	-19.446
2-furanmethanol	98-00-0	8	-227.115	-216.664	-205.676	-194.166	-182.151	-169.649	-156.688	-143.298	-129.522	-115.421	-101.077	-86.613	-72.205	-58.112	-44.69	-32.4	-21.76	-13.241	-7.108	-3.321	-1.545	-1.292	-2.06	-4.211	-6.472	-8.442	-10.12	-11.503	-12.588	-13.37	-13.841	-13.995	-13.823	-13.313	-12.456	-11.238	-9.647	-7.671	-5.297	-2.512	-0.298	1.529	2.818	3.122	1.861	-1.584	-7.709
glycerol	56-81-5	8	-259.668	-248.571	-237.002	-224.972	-212.495	-199.587	-186.268	-172.563	-158.503	-144.128	-129.488	-114.649	-99.704	-84.778	-70.045	-55.747	-42.206	-29.826	-19.056	-10.305	-3.828	0.374	2.553	1.228	-0.899	-2.882	-4.704	-6.344	-7.776	-8.971	-9.901	-10.536	-10.849	-10.814	-10.407	-9.604	-8.388	-6.741	-4.648	-2.097	-0.399	0.696	1.032	0.121	-2.585	-7.586	-15.173
n-heptane	142-82-5	5	270.576	251.589	233.249	215.554	198.505	182.102	166.345	151.233	136.766	122.945	109.768	97.236	85.349	74.107	63.509	53.556	44.247	35.582	27.562	20.185	13.453	7.366	1.922	-2.878	-7.033	-10.544	-13.411	-15.634	-17.213	-18.147	-18.437	-18.083	-17.084	-15.44	-13.152	-10.218	-6.64	-2.417	2.451	7.965	14.124	20.928	28.378	36.474	45.216	54.605	64.639
hexamethylphosphoramide	680-31-9	2	-497.009	-478.165	-458.728	-438.701	-418.088	-396.893	-375.122	-352.781	-329.879	-306.424	-282.429	-257.91	-232.89	-207.401	-181.494	-155.253	-128.833	-102.526	-76.894	-52.963	-32.346	-16.889	-7.582	-7.103	-8.757	-10.53	-12.3	-13.957	-15.399	-16.542	-17.316	-17.664	-17.543	-16.916	-15.757	-14.045	-11.764	-8.9	-5.444	-1.388	3.275	8.549	14.438	20.945	28.074	35.826	44.203
hexane	110-54-3	5	271.348	252.305	233.91	216.164	199.066	182.615	166.813	151.658	137.15	123.29	110.077	97.51	85.591	74.318	63.691	53.711	44.377	35.69	27.648	20.253	13.504	7.4	1.942	-2.869	-7.035	-10.555	-13.43	-15.658	-17.241	-18.178	-18.469	-18.114	-17.113	-15.466	-13.173	-10.234	-6.649	-2.417	2.461	7.986	14.157	20.975	28.44	36.552	45.312	54.718	64.772
1-hexanol	111-27-3	7	-292.382	-279.512	-266.077	-252.09	-237.566	-222.521	-206.977	-190.956	-174.49	-157.617	-140.387	-122.871	-105.173	-87.452	-69.959	-53.083	-37.407	-23.7	-12.791	-5.261	-1.143	0.115	-0.634	-3.599	-6.767	-9.541	-11.888	-13.78	-15.19	-16.099	-16.489	-16.347	-15.663	-14.427	-12.634	-10.281	-7.365	-3.886	0.154	4.752	9.336	13.882	18.165	21.718	23.906	23.982	21.278
iodobenzene	591-50-4	5	211.264	195.537	180.403	165.863	151.913	138.551	125.776	113.585	101.974	90.94	80.481	70.591	61.268	52.506	44.301	36.646	29.537	22.967	16.929	11.417	6.423	1.938	-2.045	-5.534	-8.539	-11.067	-13.128	-14.729	-15.878	-16.582	-16.848	-16.681	-16.086	-15.065	-13.622	-11.755	-9.465	-6.75	-3.605	-0.027	3.924	8.294	13.104	18.36	24.071	30.244	36.889
iodoethane	75-03-6	5	194.221	179.403	165.188	151.572	138.551	126.121	114.275	103.009	92.315	82.188	72.62	63.603	55.127	47.183	39.762	32.852	26.443	20.523	15.08	10.102	5.578	1.498	-2.151	-5.376	-8.187	-10.59	-12.59	-14.19	-15.391	-16.193	-16.593	-16.587	-16.168	-15.329	-14.062	-12.357	-10.204	-7.593	-4.513	-0.953	3.07	7.583	12.599	18.128	24.178	30.756	37.868
isobutanol	78-83-1	7	-286.363	-273.713	-260.521	-246.802	-232.573	-217.851	-202.66	-187.025	-170.979	-154.56	-137.82	-120.83	-103.693	-86.561	-69.672	-53.385	-38.226	-24.887	-14.11	-6.445	-1.98	-0.284	-0.614	-3.347	-6.366	-9.027	-11.296	-13.144	-14.544	-15.474	-15.915	-15.851	-15.271	-14.164	-12.524	-10.345	-7.625	-4.363	-0.558	3.786	7.954	11.94	15.503	18.14	19.209	18.028	14.073
2,2,4-trimethylpentane	540-84-1	5	268.014	249.166	230.964	213.405	196.49	180.219	164.591	149.605	135.261	121.56	108.499	96.08	84.302	73.165	62.667	52.809	43.591	35.012	27.072	19.771	13.108	7.084	1.697	-3.051	-7.162	-10.635	-13.471	-15.669	-17.23	-18.154	-18.44	-18.09	-17.102	-15.477	-13.214	-10.315	-6.777	-2.603	2.21	7.66	13.749	20.476	27.841	35.845	44.488	53.77	63.691
1,3,5-trimethylbenzene	108-67-8	5	199.917	185.22	171.092	157.525	144.514	132.053	120.133	108.749	97.892	87.555	77.73	68.411	59.588	51.257	43.41	36.041	29.145	22.717	16.755	11.255	6.216	1.639	-2.477	-6.129	-9.315	-12.031	-14.272	-16.033	-17.308	-18.091	-18.374	-18.152	-17.417	-16.163	-14.382	-12.068	-9.213	-5.813	-1.861	2.648	7.72	13.361	19.573	26.363	33.733	41.689	50.232
methanol	67-56-1	8	-330.909	-316.973	-302.476	-287.431	-271.853	-255.759	-239.171	-222.112	-204.612	-186.707	-168.442	-149.878	-131.097	-112.213	-93.397	-74.902	-57.105	-40.543	-25.913	-13.96	-5.235	0.157	2.626	1.03	-1.464	-3.842	-6.056	-8.055	-9.792	-11.22	-12.297	-12.986	-13.253	-13.07	-12.415	-11.267	-9.613	-7.439	-4.737	-1.5	1.437	4.146	6.434	7.843	7.796	5.682	1.021
methylacetate	79-20-9	3	-174.826	-169.716	-164.084	-157.939	-151.291	-144.151	-136.531	-128.448	-119.919	-110.966	-101.62	-91.92	-81.92	-71.694	-61.351	-51.04	-40.969	-31.409	-22.695	-15.195	-9.239	-5.035	-2.597	-3.693	-5.725	-7.723	-9.644	-11.44	-13.059	-14.448	-15.555	-16.333	-16.739	-16.734	-16.285	-15.364	-13.946	-12.011	-9.541	-6.523	-2.952	1.188	5.905	11.209	17.103	23.595	30.688
methylbenzoate	93-58-3	3	-94.689	-92.914	-90.587	-87.712	-84.298	-80.356	-75.9	-70.948	-65.53	-59.683	-53.462	-46.944	-40.234	-33.476	-26.857	-20.607	-14.987	-10.257	-6.632	-4.228	-3.034	-2.914	-3.646	-5.937	-8.42	-10.61	-12.491	-14.047	-15.26	-16.116	-16.599	-16.694	-16.389	-15.669	-14.523	-12.938	-10.904	-8.408	-5.441	-1.992	1.936	6.359	11.291	16.738	22.708	29.21	36.251
2-methyl-2-butanol	75-85-4	7	-315.424	-302.021	-288.043	-273.502	-258.413	-242.794	-226.663	-210.046	-192.971	-175.476	-157.604	-139.416	-120.996	-102.47	-84.032	-65.992	-48.836	-33.267	-20.159	-10.325	-4.138	-1.304	-1.022	-3.666	-6.71	-9.406	-11.716	-13.604	-15.042	-16.004	-16.47	-16.422	-15.846	-14.731	-13.07	-10.856	-8.085	-4.756	-0.865	3.584	8.096	12.693	17.235	21.4	24.747	26.721	26.74
isopentanol	123-51-3	7	-293.502	-280.605	-267.151	-253.152	-238.624	-223.585	-208.056	-192.062	-175.634	-158.81	-141.642	-124.198	-106.579	-88.941	-71.522	-54.695	-39.013	-25.212	-14.095	-6.254	-1.774	-0.17	-0.633	-3.454	-6.534	-9.243	-11.548	-13.418	-14.827	-15.754	-16.179	-16.09	-15.473	-14.319	-12.623	-10.379	-7.586	-4.241	-0.348	4.093	8.441	12.687	16.608	19.734	21.442	21.033	17.914
3-methyl-2-butanone	563-80-4	3	-234.353	-226.201	-217.509	-208.29	-198.558	-188.329	-177.621	-166.456	-154.856	-142.849	-130.469	-117.758	-104.774	-91.594	-78.333	-65.156	-52.309	-40.132	-29.073	-19.642	-12.298	-7.299	-4.587	-5.765	-7.891	-9.932	-11.831	-13.526	-14.961	-16.081	-16.838	-17.19	-17.1	-16.539	-15.481	-13.904	-11.793	-9.133	-5.912	-2.123	2.243	7.191	12.727	18.855	25.578	32.901	40.824
methylformate	107-31-3	4	-124.797	-121.85	-118.386	-114.417	-109.958	-105.024	-99.631	-93.799	-87.552	-80.916	-73.929	-66.634	-59.091	-51.377	-43.598	-35.889	-28.423	-21.414	-15.102	-9.731	-5.507	-2.553	-0.88	-2.063	-4.012	-5.922	-7.77	-9.524	-11.145	-12.592	-13.818	-14.78	-15.435	-15.745	-15.672	-15.187	-14.262	-12.872	-10.998	-8.621	-5.981	-2.921	0.614	4.626	9.119	14.094	19.552
4-methyl-2-pentanone	108-10-1	3	-239.655	-230.769	-221.364	-211.455	-201.057	-190.184	-178.856	-167.094	-154.922	-142.37	-129.473	-116.28	-102.852	-89.28	-75.695	-62.288	-49.34	-37.236	-26.459	-17.525	-10.843	-6.566	-4.508	-5.989	-8.266	-10.395	-12.322	-13.995	-15.363	-16.38	-17.006	-17.206	-16.951	-16.214	-14.976	-13.22	-10.932	-8.099	-4.714	-0.767	3.745	8.828	14.489	20.728	27.551	34.96	42.957
2-methoxyethanol	109-86-4	8	-311.972	-299.406	-286.317	-272.717	-258.616	-244.029	-228.972	-213.463	-197.526	-181.19	-164.492	-147.48	-130.22	-112.81	-95.389	-78.169	-61.465	-45.73	-31.564	-19.646	-10.557	-4.538	-1.374	-2.676	-5.01	-7.226	-9.282	-11.129	-12.72	-14.008	-14.95	-15.507	-15.644	-15.33	-14.539	-13.247	-11.435	-9.088	-6.193	-2.737	0.922	4.845	8.962	13.058	16.809	19.751	21.283
n-methylacetamide	79-16-3	4	-396.139	-380.613	-364.539	-347.928	-330.792	-313.144	-294.999	-276.372	-257.279	-237.738	-217.771	-197.401	-176.661	-155.594	-134.27	-112.8	-91.379	-70.348	-50.29	-32.118	-17.018	-6.084	0.301	-0.078	-2.171	-4.373	-6.588	-8.721	-10.686	-12.405	-13.815	-14.864	-15.51	-15.72	-15.468	-14.738	-13.514	-11.788	-9.554	-6.808	-3.853	-0.595	2.967	6.771	10.739	14.786	18.814
methylformamide	123-39-7	4	-344.626	-330.629	-316.164	-301.245	-285.887	-270.102	-253.905	-237.31	-220.333	-202.99	-185.301	-167.288	-148.984	-130.435	-111.718	-92.954	-74.353	-56.258	-39.214	-23.995	-11.514	-2.524	2.762	2.236	0.182	-1.988	-4.2	-6.375	-8.436	-10.311	-11.939	-13.266	-14.247	-14.847	-15.036	-14.793	-14.099	-12.943	-11.316	-9.211	-7.058	-4.723	-2.196	0.444	3.104	5.687	8.097
n-methyl-2-pyrrolidinone	872-50-4	2	-407.473	-391.574	-375.196	-358.348	-341.041	-323.287	-305.096	-286.481	-267.455	-248.03	-228.223	-208.051	-187.537	-166.714	-145.63	-124.367	-103.067	-81.988	-61.582	-42.6	-26.128	-13.373	-5.109	-4.584	-6.164	-7.958	-9.858	-11.754	-13.539	-15.117	-16.405	-17.333	-17.846	-17.898	-17.455	-16.489	-14.977	-12.904	-10.254	-7.019	-3.189	1.242	6.279	11.926	18.188	25.068	32.567
morpholine	110-91-8	2	-690.591	-658.303	-625.441	-592.018	-558.052	-523.563	-488.577	-453.128	-417.258	-381.022	-344.493	-307.768	-270.977	-234.299	-197.984	-162.379	-127.988	-95.55	-66.145	-41.206	-22.176	-9.718	-3.149	-3.677	-5.772	-7.833	-9.798	-11.608	-13.203	-14.526	-15.528	-16.164	-16.397	-16.195	-15.531	-14.383	-12.733	-10.567	-7.873	-4.642	-1.038	3.024	7.568	12.583	18.055	23.97	30.309
nitrobenzene	98-95-3	6	29.642	26.171	23.182	20.65	18.542	16.821	15.446	14.366	13.526	12.863	12.309	11.795	11.251	10.613	9.824	8.843	7.647	6.231	4.607	2.808	0.877	-1.136	-3.173	-5.564	-7.844	-9.837	-11.537	-12.938	-14.034	-14.814	-15.266	-15.38	-15.141	-14.538	-13.555	-12.181	-10.403	-8.206	-5.58	-2.512	0.864	4.647	8.876	13.561	18.708	24.328	30.429
nitroethane	79-24-3	6	32.504	28.144	24.258	20.822	17.809	15.19	12.933	11.006	9.373	7.996	6.839	5.864	5.033	4.31	3.662	3.055	2.46	1.849	1.199	0.49	-0.295	-1.165	-2.123	-3.732	-5.415	-6.939	-8.317	-9.554	-10.645	-11.575	-12.325	-12.867	-13.172	-13.206	-12.935	-12.328	-11.353	-9.981	-8.185	-5.944	-3.528	-0.747	2.468	6.128	10.241	14.815	19.857
nitromethane	75-52-5	6	33.25	28.596	24.402	20.642	17.287	14.309	11.677	9.358	7.323	5.543	3.988	2.635	1.463	0.452	-0.411	-1.14	-1.744	-2.235	-2.624	-2.924	-3.151	-3.326	-3.471	-4.229	-5.043	-5.698	-6.239	-6.708	-7.135	-7.538	-7.923	-8.279	-8.581	-8.796	-8.879	-8.782	-8.455	-7.848	-6.915	-5.612	-4.628	-3.493	-2.044	-0.261	1.871	4.363	7.225
octane	111-65-9	5	269.937	250.992	232.692	215.037	198.026	181.66	165.937	150.858	136.424	122.633	109.485	96.981	85.12	73.903	63.329	53.398	44.11	35.465	27.462	20.103	13.387	7.313	1.883	-2.905	-7.049	-10.551	-13.41	-15.626	-17.198	-18.128	-18.414	-18.057	-17.056	-15.412	-13.125	-10.193	-6.618	-2.399	2.464	7.972	14.123	20.92	28.361	36.446	45.177	54.553	64.574
1-octanol	111-87-5	7	-285.936	-273.035	-259.571	-245.557	-231.005	-215.933	-200.361	-184.313	-167.818	-150.917	-133.663	-116.131	-98.438	-80.762	-63.391	-46.776	-31.574	-18.623	-8.748	-2.406	0.573	0.903	-0.511	-3.735	-7.034	-9.901	-12.308	-14.23	-15.645	-16.535	-16.888	-16.692	-15.938	-14.619	-12.733	-10.275	-7.246	-3.645	0.524	5.26	10.036	14.82	19.389	23.286	25.879	26.404	24.152
pentane	109-66-0	5	272.122	253.022	234.573	216.775	199.627	183.129	167.281	152.083	137.534	123.635	110.385	97.783	85.831	74.527	63.872	53.865	44.507	35.796	27.733	20.319	13.552	7.432	1.961	-2.863	-7.04	-10.57	-13.452	-15.686	-17.274	-18.214	-18.507	-18.152	-17.15	-15.501	-13.205	-10.261	-6.67	-2.431	2.455	7.99	14.171	21.001	28.479	36.604	45.378	54.801	64.871
1-pentanol	71-41-0	7	-300.717	-287.739	-274.192	-260.089	-245.442	-230.268	-214.585	-198.416	-181.788	-164.739	-147.316	-129.584	-111.641	-93.634	-75.791	-58.472	-42.219	-27.771	-15.968	-7.478	-2.467	-0.492	-0.735	-3.493	-6.552	-9.254	-11.558	-13.433	-14.85	-15.785	-16.218	-16.133	-15.517	-14.36	-12.654	-10.396	-7.581	-4.208	-0.279	4.205	8.658	13.07	17.236	20.712	22.902	23.106	20.683
2-pentanol	6032-29-7	7	-304.247	-291.02	-277.236	-262.908	-248.052	-232.684	-216.826	-200.501	-183.74	-166.579	-149.067	-131.268	-113.274	-95.224	-77.335	-59.946	-43.577	-28.95	-16.907	-8.149	-2.895	-0.745	-0.885	-3.646	-6.727	-9.442	-11.755	-13.636	-15.056	-15.993	-16.427	-16.343	-15.729	-14.574	-12.872	-10.616	-7.804	-4.435	-0.507	3.977	8.459	12.953	17.287	21.085	23.837	24.93	23.767
3-pentanol	584-02-1	7	-298.052	-284.647	-270.701	-256.229	-241.25	-225.783	-209.853	-193.488	-176.721	-159.592	-142.155	-124.481	-106.67	-88.875	-71.337	-54.427	-38.701	-24.902	-13.838	-6.1	-1.754	-0.288	-0.874	-3.778	-6.914	-9.664	-11.994	-13.878	-15.291	-16.213	-16.627	-16.519	-15.878	-14.695	-12.964	-10.681	-7.842	-4.447	-0.496	4.01	8.486	12.951	17.232	20.946	23.583	24.539	23.241
2-pentanone	107-87-9	3	-249.212	-240.333	-230.909	-220.951	-210.474	-199.492	-188.023	-176.087	-163.709	-150.916	-137.743	-124.234	-110.449	-96.471	-82.417	-68.463	-54.866	-41.991	-30.313	-20.376	-12.667	-7.445	-4.625	-5.77	-7.874	-9.895	-11.773	-13.451	-14.871	-15.979	-16.729	-17.079	-16.994	-16.443	-15.404	-13.855	-11.779	-9.164	-5.998	-2.273	2.02	6.885	12.328	18.354	24.966	32.167	39.96
3-pentanone	96-22-0	3	-228.017	-220.409	-212.241	-203.525	-194.272	-184.496	-174.211	-163.436	-152.191	-140.501	-128.398	-115.923	-103.133	-90.111	-76.975	-63.905	-51.16	-39.104	-28.206	-18.987	-11.9	-7.173	-4.702	-5.985	-8.155	-10.213	-12.103	-13.77	-15.16	-16.222	-16.912	-17.191	-17.026	-16.389	-15.255	-13.606	-11.425	-8.699	-5.418	-1.573	2.845	7.84	13.418	19.583	26.339	33.688	41.635
n-pentylacetate	628-63-7	3	-182.489	-176.515	-170.021	-163.017	-155.512	-147.519	-139.05	-130.123	-120.756	-110.974	-100.811	-90.314	-79.55	-68.618	-57.662	-46.889	-36.584	-27.116	-18.905	-12.348	-7.709	-5.017	-4.055	-5.944	-8.417	-10.677	-12.677	-14.37	-15.716	-16.675	-17.214	-17.303	-16.917	-16.034	-14.638	-12.712	-10.246	-7.228	-3.651	0.492	5.205	10.493	16.36	22.81	29.845	37.467	45.678
ethoxybenzene	103-73-1	5	-5.009	-5.318	-5.104	-4.396	-3.234	-1.669	0.233	2.385	4.682	6.993	9.168	11.045	12.465	13.292	13.433	12.857	11.598	9.748	7.435	4.802	1.993	-0.866	-3.667	-6.651	-9.39	-11.731	-13.674	-15.218	-16.36	-17.096	-17.42	-17.323	-16.799	-15.838	-14.429	-12.562	-10.228	-7.414	-4.111	-0.308	3.997	8.819	14.167	20.049	26.475	33.45	40.982
phenol	108-95-2	9	4.272	4.161	4.487	5.209	6.273	7.612	9.14	10.752	12.326	13.727	14.813	15.455	15.55	15.041	13.924	12.252	10.118	7.646	4.966	2.202	-0.536	-3.156	-5.588	-8.013	-10.137	-11.863	-13.201	-14.164	-14.764	-15.011	-14.916	-14.487	-13.734	-12.663	-11.283	-9.6	-7.621	-5.354	-2.807	0.013	0.265	-2.755	-10.19	-23.05	-41.085	-62.995	-87.289
3-picoline	108-99-6	2	-536.904	-512.587	-487.748	-462.4	-436.559	-410.242	-383.469	-356.261	-328.644	-300.648	-272.31	-243.674	-214.803	-185.785	-156.761	-127.966	-99.823	-73.084	-48.993	-29.225	-15.24	-7.257	-4.047	-5.557	-7.911	-10.083	-12.029	-13.708	-15.082	-16.119	-16.79	-17.069	-16.934	-16.367	-15.351	-13.872	-11.916	-9.474	-6.534	-3.087	0.86	5.324	10.313	15.835	21.896	28.499	35.651
4-methylpyridine	108-89-4	2	-551.74	-526.861	-501.459	-475.549	-449.146	-422.266	-394.927	-367.15	-338.96	-310.385	-281.46	-252.227	-222.746	-193.099	-163.417	-133.922	-105.008	-77.397	-52.308	-31.466	-16.489	-7.777	-4.147	-5.544	-7.858	-10.007	-11.944	-13.625	-15.011	-16.066	-16.761	-17.068	-16.965	-16.431	-15.448	-14.003	-12.08	-9.669	-6.759	-3.34	0.588	5.04	10.023	15.543	21.608	28.222	35.391
piperidine	110-89-4	1	-778.642	-743.781	-708.316	-672.257	-635.613	-598.401	-560.637	-522.345	-483.553	-444.299	-404.628	-364.6	-324.29	-283.792	-243.233	-202.787	-162.729	-123.564	-86.323	-53.078	-27.104	-11.092	-4.278	-5.535	-8.146	-10.557	-12.691	-14.482	-15.876	-16.83	-17.308	-17.285	-16.741	-15.659	-14.029	-11.843	-9.096	-5.784	-1.905	2.539	7.403	12.747	18.582	24.89	31.652	38.844	46.443
propanol	71-23-8	7	-305.504	-292.458	-278.851	-264.697	-250.012	-234.813	-219.122	-202.965	-186.373	-169.385	-152.05	-134.435	-116.63	-98.769	-81.051	-63.782	-47.417	-32.589	-20.054	-10.504	-4.268	-1.133	-0.442	-2.805	-5.661	-8.22	-10.441	-12.286	-13.722	-14.721	-15.256	-15.308	-14.86	-13.897	-12.41	-10.389	-7.831	-4.732	-1.091	3.092	7.113	10.984	14.485	17.142	18.343	17.412	13.794
2-propanol	67-63-0	7	-322.012	-308.84	-295.068	-280.708	-265.77	-250.269	-234.224	-217.655	-200.59	-183.064	-165.121	-146.821	-128.247	-109.52	-90.824	-72.441	-54.806	-38.551	-24.487	-13.439	-5.92	-1.846	-0.573	-2.775	-5.586	-8.128	-10.356	-12.229	-13.708	-14.761	-15.361	-15.483	-15.11	-14.226	-12.818	-10.877	-8.398	-5.375	-1.805	2.312	6.366	10.396	14.247	17.552	19.824	20.483	18.965
n-propylamine	107-10-8	1	-831.476	-794.604	-757.108	-718.999	-680.285	-640.981	-601.101	-560.667	-519.703	-478.24	-436.319	-393.99	-351.319	-308.392	-265.322	-222.273	-179.499	-137.458	-97.099	-60.421	-30.909	-12.008	-3.531	-4.293	-6.694	-9.002	-11.123	-12.976	-14.498	-15.636	-16.35	-16.609	-16.391	-15.679	-14.461	-12.729	-10.477	-7.703	-4.404	-0.58	3.531	8.043	12.989	18.354	24.125	30.289	36.833
n-propylformate	110-74-7	3	-133.135	-129.728	-125.792	-121.337	-116.377	-110.925	-104.998	-98.616	-91.803	-84.589	-77.011	-69.12	-60.986	-52.703	-44.4	-36.249	-28.472	-21.334	-15.125	-10.112	-6.478	-4.272	-3.39	-5.082	-7.35	-9.451	-11.349	-13.005	-14.379	-15.433	-16.134	-16.449	-16.35	-15.813	-14.817	-13.346	-11.384	-8.92	-5.945	-2.451	1.395	5.686	10.448	15.679	21.37	27.515	34.108
propylenecarbonate	108-32-7	4	-120.772	-117.869	-114.43	-110.466	-105.992	-101.023	-95.579	-89.683	-83.363	-76.656	-69.607	-62.274	-54.733	-47.079	-39.436	-31.955	-24.818	-18.232	-12.411	-7.552	-3.801	-1.225	0.204	-0.819	-2.521	-4.234	-5.949	-7.643	-9.281	-10.823	-12.223	-13.432	-14.402	-15.089	-15.449	-15.444	-15.042	-14.212	-12.928	-11.17	-9.086	-6.553	-3.525	0.01	4.06	8.635	13.741
propionitrile	107-12-0	4	-165.242	-160.031	-154.265	-147.955	-141.114	-133.76	-125.913	-117.596	-108.841	-99.687	-90.183	-80.395	-70.407	-60.334	-50.325	-40.572	-31.316	-22.84	-15.443	-9.397	-4.889	-1.967	-0.532	-1.778	-3.74	-5.706	-7.646	-9.517	-11.272	-12.858	-14.223	-15.317	-16.095	-16.515	-16.541	-16.141	-15.288	-13.96	-12.137	-9.804	-7.121	-3.97	-0.308	3.871	8.572	13.801	19.561
pyridine	110-86-1	2	-524.366	-500.467	-476.05	-451.127	-425.715	-399.83	-373.491	-346.721	-319.544	-291.99	-264.097	-235.912	-207.5	-178.955	-150.431	-122.184	-94.67	-68.687	-45.504	-26.737	-13.659	-6.29	-3.365	-4.867	-7.157	-9.264	-11.154	-12.796	-14.16	-15.22	-15.952	-16.336	-16.35	-15.979	-15.206	-14.016	-12.396	-10.332	-7.811	-4.823	-1.394	2.511	6.91	11.811	17.224	23.157	29.619
pyrrolidine	123-75-1	1	-807.467	-771.845	-735.61	-698.773	-661.344	-623.337	-584.771	-545.666	-506.048	-465.951	-425.414	-384.49	-343.242	-301.752	-260.128	-218.523	-177.175	-136.517	-97.445	-61.834	-32.936	-14.041	-5.203	-5.751	-8.016	-10.196	-12.197	-13.936	-15.345	-16.369	-16.962	-17.089	-16.722	-15.842	-14.432	-12.481	-9.98	-6.924	-3.308	0.869	5.468	10.55	16.128	22.186	28.709	35.677	43.07
chinoline	91-22-5	2	-477.746	-455.225	-432.195	-408.666	-384.649	-360.157	-335.206	-309.813	-284.001	-257.799	-231.245	-204.394	-177.33	-150.186	-123.189	-96.74	-71.54	-48.717	-29.781	-16.08	-7.933	-4.365	-3.813	-5.994	-8.499	-10.698	-12.574	-14.115	-15.308	-16.141	-16.604	-16.689	-16.386	-15.686	-14.581	-13.063	-11.123	-8.752	-5.94	-2.68	1.002	5.138	9.743	14.826	20.397	26.462	33.031
styrene	100-42-5	5	200.159	184.874	170.193	156.114	142.634	129.748	117.452	105.744	94.617	84.066	74.087	64.673	55.817	47.513	39.752	32.528	25.83	19.65	13.979	8.808	4.125	-0.077	-3.81	-7.082	-9.902	-12.279	-14.218	-15.727	-16.809	-17.468	-17.705	-17.521	-16.914	-15.88	-14.416	-12.514	-10.169	-7.372	-4.114	-0.386	3.818	8.509	13.699	19.396	25.609	32.347	39.619
tetrahydrothiophene-1,1-dioxide	126-33-0	4	-147.002	-144.167	-140.766	-136.804	-132.285	-127.217	-121.605	-115.458	-108.786	-101.602	-93.923	-85.771	-77.177	-68.189	-58.873	-49.328	-39.699	-30.195	-21.102	-12.79	-5.68	-0.175	3.45	2.791	0.786	-1.42	-3.777	-6.217	-8.657	-11.013	-13.203	-15.15	-16.787	-18.055	-18.908	-19.306	-19.216	-18.613	-17.476	-15.791	-13.737	-11.179	-8.068	-4.4	-0.171	4.621	9.98
tert-butanol	75-65-0	7	-331.911	-317.802	-303.113	-287.852	-272.03	-255.66	-238.761	-221.354	-203.465	-185.131	-166.399	-147.335	-128.03	-108.621	-89.317	-70.442	-52.492	-36.176	-22.367	-11.88	-5.1	-1.757	-1.065	-3.492	-6.4	-8.996	-11.238	-13.091	-14.52	-15.499	-16.002	-16.011	-15.51	-14.486	-12.93	-10.833	-8.191	-5.001	-1.261	3.03	7.323	11.659	15.904	19.737	22.723	24.33	24.005
methyl-t-butylether	1634-04-4	3	-360.493	-346.517	-331.954	-316.81	-301.095	-284.822	-268.001	-250.648	-232.78	-214.416	-195.583	-176.313	-156.652	-136.672	-116.482	-96.274	-76.368	-57.302	-39.9	-25.235	-14.32	-7.591	-4.608	-6.332	-8.949	-11.322	-13.397	-15.126	-16.465	-17.376	-17.824	-17.781	-17.224	-16.131	-14.486	-12.276	-9.489	-6.116	-2.148	2.42	7.595	13.38	19.78	26.797	34.435	42.696	51.582
2,5,8,11,14-pentaoxapentadecane	143-24-8	3	-542.958	-505.623	-468.243	-431.045	-394.349	-358.567	-324.185	-291.679	-261.395	-233.43	-207.616	-183.597	-160.963	-139.364	-118.564	-98.471	-79.154	-60.868	-44.08	-29.447	-17.685	-9.297	-4.3	-4.914	-6.924	-8.902	-10.793	-12.537	-14.075	-15.35	-16.306	-16.896	-17.077	-16.812	-16.071	-14.826	-13.057	-10.744	-7.872	-4.428	-0.403	4.214	9.429	15.248	21.677	28.72	36.38
1,1,2,2-tetrachloroethane	79-34-5	6	223.414	206.565	190.343	174.747	159.775	145.427	131.7	118.594	106.108	94.239	82.987	72.348	62.322	52.906	44.097	35.893	28.29	21.285	14.874	9.053	3.817	-0.842	-4.928	-8.452	-11.42	-13.846	-15.74	-17.119	-17.999	-18.399	-18.344	-17.857	-16.969	-15.712	-14.119	-12.227	-10.072	-7.692	-5.118	-2.379	-1.455	-1.597	-2.502	-4.134	-6.392	-9.122	-12.151
2,2'-oxybis(2,1-ethanediyloxy)bisethanol	112-60-7	7	-405.572	-388.648	-371.169	-353.148	-334.599	-315.539	-295.991	-275.977	-255.528	-234.679	-213.473	-191.966	-170.23	-148.363	-126.504	-104.858	-83.737	-63.609	-45.149	-29.207	-16.626	-7.9	-2.896	-3.492	-5.465	-7.446	-9.384	-11.221	-12.896	-14.35	-15.526	-16.371	-16.84	-16.892	-16.492	-15.611	-14.224	-12.31	-9.851	-6.833	-3.251	0.907	5.647	10.975	16.89	23.387	30.457
thf	109-99-9	2	-371.376	-357.684	-343.393	-328.511	-313.044	-297.003	-280.397	-263.24	-245.546	-227.334	-208.626	-189.452	-169.853	-149.888	-129.647	-109.277	-89.02	-69.281	-50.701	-34.198	-20.836	-11.425	-6.06	-6.689	-8.723	-10.699	-12.547	-14.196	-15.578	-16.635	-17.311	-17.561	-17.346	-16.635	-15.401	-13.621	-11.279	-8.36	-4.852	-0.747	3.965	9.288	15.229	21.792	28.979	36.795	45.241
tetramethylurea	632-22-4	2	-432.498	-416.242	-399.438	-382.095	-364.218	-345.814	-326.893	-307.461	-287.527	-267.102	-246.198	-224.829	-203.014	-180.784	-158.184	-135.294	-112.264	-89.37	-67.123	-46.409	-28.543	-14.979	-6.544	-6.156	-7.811	-9.599	-11.412	-13.145	-14.698	-15.986	-16.936	-17.489	-17.598	-17.223	-16.334	-14.908	-12.927	-10.375	-7.24	-3.514	0.811	5.741	11.281	17.435	24.207	31.599	39.613
toluene	108-88-3	5	197.817	182.889	168.553	154.804	141.638	129.048	117.03	105.578	94.685	84.345	74.55	65.293	56.566	48.361	40.67	33.485	26.797	20.597	14.879	9.635	4.858	0.541	-3.32	-6.73	-9.692	-12.207	-14.277	-15.9	-17.076	-17.801	-18.07	-17.88	-17.224	-16.096	-14.489	-12.394	-9.806	-6.715	-3.113	1.005	5.649	10.826	16.542	22.804	29.618	36.99	44.926
tri-n-butylamine	102-82-9	1	-1100.35	-1047.27	-993.656	-939.522	-884.901	-829.83	-774.351	-718.513	-662.37	-605.981	-549.407	-492.707	-435.936	-379.139	-322.353	-265.613	-208.994	-152.774	-98.095	-49.044	-14.921	-1.311	-0.275	-3.936	-7.68	-10.894	-13.554	-15.641	-17.142	-18.046	-18.346	-18.034	-17.107	-15.56	-13.391	-10.597	-7.178	-3.131	1.545	6.85	12.785	19.352	26.55	34.379	42.842	51.937	61.665
1,1,1-trichloroethane	71-55-6	5	233.889	216.636	200.017	184.03	168.674	153.947	139.848	126.374	113.523	101.294	89.683	78.688	68.306	58.534	49.368	40.805	32.841	25.471	18.69	12.493	6.876	1.831	-2.646	-6.563	-9.927	-12.744	-15.023	-16.769	-17.992	-18.699	-18.897	-18.594	-17.796	-16.51	-14.743	-12.498	-9.781	-6.595	-2.941	1.179	5.651	10.54	15.867	21.633	27.841	34.494	41.597
trichloroethene	79-01-6	5	246.162	228.35	211.169	194.618	178.697	163.405	148.74	134.703	121.291	108.504	96.34	84.799	73.878	63.577	53.893	44.826	36.372	28.531	21.299	14.674	8.654	3.234	-1.588	-5.817	-9.457	-12.513	-14.991	-16.897	-18.238	-19.023	-19.26	-18.959	-18.133	-16.792	-14.951	-12.625	-9.83	-6.582	-2.899	1.2	4.916	8.509	12.033	15.411	18.587	21.529	24.236
triethylamine	121-44-8	1	-1033.01	-985.233	-936.9	-888.029	-838.642	-788.77	-738.447	-687.715	-636.62	-585.218	-533.565	-481.724	-429.758	-377.726	-325.684	-273.689	-221.821	-170.272	-119.674	-72.117	-33.121	-10.157	-2.813	-5.048	-8.316	-11.205	-13.659	-15.633	-17.094	-18.013	-18.372	-18.153	-17.345	-15.938	-13.927	-11.305	-8.069	-4.215	0.259	5.355	11.074	17.418	24.387	31.983	40.206	49.057	58.535
triethyleneglycol	112-27-6	2	-333.351	-319.746	-305.651	-291.074	-276.026	-260.52	-244.568	-228.189	-211.403	-194.235	-176.718	-158.896	-140.827	-122.595	-104.326	-86.208	-68.526	-51.703	-36.322	-23.09	-12.681	-5.479	-1.386	-2.321	-4.483	-6.593	-8.606	-10.474	-12.144	-13.565	-14.688	-15.468	-15.866	-15.845	-15.374	-14.426	-12.98	-11.015	-8.516	-5.468	-2.074	1.72	5.888	10.329	14.884	19.311	23.253
trifluoroaceticacid	76-05-1	9	130.623	120.932	111.682	102.85	94.415	86.352	78.639	71.253	64.173	57.378	50.855	44.59	38.578	32.815	27.306	22.058	17.083	12.397	8.019	3.969	0.266	-3.07	-6.019	-8.731	-11.033	-12.853	-14.196	-15.069	-15.482	-15.448	-14.986	-14.123	-12.889	-11.326	-9.486	-7.43	-5.234	-2.983	-0.77	1.307	-5.091	-22.119	-48.615	-81.334	-117.063	-153.969	-191.213
2,2,2-trifluoroethanol	75-89-8	9	-65.797	-62.295	-58.268	-53.745	-48.758	-43.355	-37.595	-31.559	-25.358	-19.138	-13.088	-7.438	-2.45	1.616	4.546	6.229	6.682	6.052	4.572	2.509	0.118	-2.383	-4.823	-7.431	-9.722	-11.542	-12.905	-13.832	-14.344	-14.465	-14.222	-13.644	-12.759	-11.597	-10.183	-8.542	-6.693	-4.651	-2.423	-0.01	-0.245	-3.058	-8.988	-18.863	-32.921	-50.661	-71.127
1,3-propanediol	504-63-2	8	-330.205	-315.546	-300.406	-284.801	-268.748	-252.267	-235.381	-218.117	-200.509	-182.596	-164.428	-146.068	-127.603	-109.15	-90.879	-73.039	-55.987	-40.219	-26.353	-15.03	-6.705	-1.45	1.1	-0.346	-2.681	-4.885	-6.92	-8.743	-10.313	-11.589	-12.532	-13.106	-13.281	-13.029	-12.327	-11.154	-9.496	-7.337	-4.668	-1.48	1.551	4.483	7.141	9.106	9.808	8.576	4.781
2,4,6-collidine	108-75-8	2	-574.538	-549.372	-523.633	-497.324	-470.452	-443.023	-415.048	-386.538	-357.508	-327.978	-297.973	-267.527	-236.686	-205.522	-174.149	-142.77	-111.77	-81.907	-54.578	-31.914	-16.024	-7.378	-4.336	-6.199	-8.82	-11.179	-13.233	-14.941	-16.269	-17.187	-17.671	-17.698	-17.251	-16.313	-14.872	-12.916	-10.436	-7.424	-3.872	0.225	4.874	10.079	15.846	22.177	29.077	36.55	44.598
1,3-dimethylbenzene	108-38-3	5	198.998	184.173	169.928	156.259	143.161	130.626	118.65	107.225	96.344	86	76.185	66.893	58.114	49.843	42.07	34.789	27.992	21.674	15.829	10.451	5.537	1.083	-2.912	-6.45	-9.53	-12.151	-14.311	-16.006	-17.232	-17.985	-18.259	-18.047	-17.342	-16.139	-14.43	-12.208	-9.466	-6.197	-2.395	1.948	6.837	12.277	18.276	24.838	31.967	39.669	47.948
1,2-dimethylbenzene	95-47-6	5	196.807	182.087	167.946	154.382	141.387	128.956	117.083	105.76	94.982	84.739	75.026	65.834	57.154	48.98	41.303	34.115	27.409	21.178	15.416	10.116	5.275	0.889	-3.046	-6.53	-9.564	-12.148	-14.279	-15.954	-17.17	-17.921	-18.202	-18.006	-17.327	-16.158	-14.491	-12.32	-9.636	-6.432	-2.702	1.562	6.366	11.717	17.62	24.082	31.107	38.7	46.866
1,4-dimethylbenzene	106-42-3	5	199.5	184.647	170.374	156.677	143.55	130.988	118.984	107.531	96.624	86.253	76.413	67.096	58.294	49.999	42.204	34.903	28.088	21.752	15.891	10.5	5.573	1.109	-2.895	-6.44	-9.526	-12.152	-14.315	-16.012	-17.24	-17.993	-18.266	-18.053	-17.348	-16.143	-14.433	-12.21	-9.467	-6.198	-2.396	1.946	6.833	12.272	18.267	24.825	31.949	39.645	47.917
h2o	7732-18-5	10	-308.905	-292.451	-275.473	-257.99	-240.025	-221.606	-202.77	-183.565	-164.055	-144.321	-124.476	-104.674	-85.126	-66.122	-48.052	-31.406	-16.742	-4.58	4.756	11.259	15.244	17.221	17.738	16.073	14.002	12.103	10.362	8.766	7.307	5.976	4.772	3.695	2.75	1.949	1.305	0.838	0.567	0.518	0.714	1.18	-3.959	-11.936	-21.625	-32.861	-45.405	-58.988	-73.352
propyleneglycol	57-55-6	8	-287.208	-275.015	-262.324	-249.146	-235.492	-221.376	-206.817	-191.836	-176.461	-160.728	-144.684	-128.389	-111.93	-95.427	-79.057	-63.078	-47.854	-33.88	-21.74	-12.002	-5.027	-0.806	1.038	-0.68	-3.142	-5.414	-7.462	-9.251	-10.746	-11.912	-12.718	-13.137	-13.144	-12.717	-11.837	-10.489	-8.661	-6.343	-3.526	-0.205	2.648	5.155	7.132	8.118	7.547	4.845	-0.423
1,4-butadiol	110-63-4		-382.179	-364.512	-346.349	-327.708	-308.613	-289.09	-269.17	-248.888	-228.287	-207.417	-186.337	-165.123	-143.87	-122.709	-101.828	-81.505	-62.154	-44.365	-28.895	-16.514	-7.722	-2.475	-0.196	-1.815	-4.239	-6.5	-8.552	-10.353	-11.86	-13.031	-13.832	-14.229	-14.194	-13.703	-12.735	-11.274	-9.305	-6.817	-3.803	-0.256	3.42	7.228	11.018	14.448	17.006	17.985	16.567
2-ethoxy-2-methyl-propane	637-92-3		-357.591	-343.043	-327.92	-312.234	-295.997	-279.223	-261.928	-244.13	-225.852	-207.118	-187.962	-168.424	-148.56	-128.458	-108.25	-88.164	-68.578	-50.111	-33.665	-20.317	-10.927	-5.641	-3.779	-5.98	-8.854	-11.409	-13.6	-15.388	-16.737	-17.616	-17.999	-17.863	-17.188	-15.959	-14.162	-11.787	-8.823	-5.263	-1.1	3.669	9.051	15.049	21.666	28.905	36.769	45.258	54.376
co2	124-38-9		194.13	178.582	163.674	149.404	135.768	122.763	110.386	98.633	87.5	76.982	67.075	57.771	49.065	40.95	33.417	26.459	20.064	14.223	8.924	4.155	-0.098	-3.848	-7.112	-9.904	-12.24	-14.135	-15.606	-16.665	-17.325	-17.599	-17.495	-17.018	-16.173	-14.96	-13.375	-11.414	-9.067	-6.324	-3.172	0.403	4.416	8.884	13.822	19.246	25.172	31.614	38.586
1-methyl-4-isopropylbenzene	99-87-6	5	206.506	191.446	176.954	163.025	149.652	136.831	124.555	112.817	101.612	90.933	80.775	71.132	61.997	53.366	45.234	37.597	30.451	23.792	17.619	11.93	6.725	2.003	-2.235	-5.987	-9.251	-12.025	-14.304	-16.086	-17.365	-18.138	-18.399	-18.143	-17.366	-16.063	-14.228	-11.856	-8.944	-5.485	-1.476	3.088	8.21	13.895	20.147	26.968	34.362	42.332	50.881
diethoxymethane	462-95-3		-246.783	-238.425	-229.472	-219.932	-209.812	-199.125	-187.881	-176.098	-163.794	-150.994	-137.732	-124.052	-110.016	-95.717	-81.292	-66.947	-52.989	-39.851	-28.093	-18.326	-11.045	-6.428	-4.253	-5.974	-8.501	-10.793	-12.81	-14.513	-15.863	-16.824	-17.362	-17.449	-17.059	-16.169	-14.761	-12.817	-10.323	-7.269	-3.643	0.561	5.352	10.736	16.716	23.299	30.486	38.282	46.689
2,2-dimethyl-4-hydroxymethyl-1,3-dioxolane	100-79-8	7	-245.401	-235.906	-225.899	-215.392	-204.401	-192.943	-181.037	-168.706	-155.977	-142.88	-129.457	-115.762	-101.868	-87.876	-73.936	-60.258	-47.14	-34.975	-24.234	-15.39	-8.79	-4.522	-2.379	-3.869	-6.163	-8.278	-10.182	-11.843	-13.227	-14.299	-15.028	-15.382	-15.335	-14.861	-13.938	-12.547	-10.672	-8.298	-5.413	-2.007	1.601	5.442	9.425	13.31	16.724	19.116	19.764
dimethylisosorbide	5306-85-4	3	-270.288	-258.695	-246.751	-234.47	-221.869	-208.961	-195.761	-182.287	-168.554	-154.585	-140.406	-126.053	-111.579	-97.058	-82.602	-68.377	-54.625	-41.677	-29.96	-19.948	-12.064	-6.535	-3.303	-4.34	-6.425	-8.41	-10.265	-11.953	-13.434	-14.666	-15.605	-16.213	-16.451	-16.286	-15.687	-14.628	-13.084	-11.036	-8.467	-5.362	-1.709	2.503	7.284	12.641	18.581	25.11	32.233
2-hydroxypropanoicacidethylester	97-64-3	7	-264.067	-253.471	-242.325	-230.641	-218.433	-205.721	-192.527	-178.877	-164.806	-150.358	-135.589	-120.572	-105.408	-90.233	-75.235	-60.673	-46.895	-34.334	-23.476	-14.763	-8.458	-4.543	-2.72	-4.295	-6.622	-8.787	-10.754	-12.482	-13.932	-15.065	-15.843	-16.234	-16.206	-15.734	-14.794	-13.364	-11.429	-8.973	-5.984	-2.45	1.405	5.64	10.228	15.066	19.996	24.778	29.068
ethyllaurate	106-33-2	3	-149.413	-144.313	-138.703	-132.59	-125.979	-118.879	-111.3	-103.258	-94.773	-85.875	-76.607	-67.035	-57.259	-47.424	-37.743	-28.509	-20.094	-12.919	-7.369	-3.682	-1.86	-1.664	-2.703	-5.524	-8.523	-11.161	-13.4	-15.209	-16.559	-17.424	-17.786	-17.625	-16.927	-15.679	-13.873	-11.5	-8.552	-5.026	-0.915	3.783	9.071	14.952	21.427	28.497	36.165	44.43	53.293
4-hydroxymethyl-1,3-dioxolan	5464-28-8	8	-234.5	-225.296	-215.6	-205.429	-194.802	-183.74	-172.266	-160.408	-148.194	-135.663	-122.858	-109.836	-96.668	-83.454	-70.328	-57.473	-45.137	-33.638	-23.354	-14.671	-7.901	-3.186	-0.442	-1.513	-3.534	-5.471	-7.303	-9.004	-10.541	-11.875	-12.969	-13.783	-14.279	-14.421	-14.176	-13.516	-12.413	-10.845	-8.792	-6.237	-3.575	-0.74	2.178	4.922	7.096	8.137	7.341
lacticacid	50-21-5		-161.623	-153.193	-144.576	-135.795	-126.88	-117.857	-108.756	-99.609	-90.45	-81.319	-72.26	-63.328	-54.591	-46.132	-38.056	-30.484	-23.558	-17.422	-12.214	-8.031	-4.92	-2.854	-1.738	-2.848	-4.466	-5.927	-7.222	-8.336	-9.251	-9.945	-10.394	-10.575	-10.463	-10.038	-9.278	-8.166	-6.687	-4.829	-2.583	0.058	1.555	1.856	0.381	-3.948	-12.209	-25	-42.095
dipentene	138-86-3	5	194.733	181.127	168.004	155.356	143.173	131.449	120.175	109.345	98.952	88.991	79.458	70.349	61.662	53.396	45.552	38.132	31.138	24.576	18.45	12.767	7.534	2.758	-1.551	-5.454	-8.879	-11.79	-14.183	-16.052	-17.391	-18.195	-18.457	-18.173	-17.336	-15.942	-13.984	-11.459	-8.362	-4.688	-0.433	4.407	9.835	15.856	22.471	29.685	37.5	45.918	54.941
2-methyltetrahydrofuran	96-47-9	3	-359.162	-345.552	-331.367	-316.613	-301.299	-285.433	-269.025	-252.087	-234.634	-216.683	-198.258	-179.39	-160.122	-140.519	-120.686	-100.79	-81.116	-62.129	-44.546	-29.333	-17.493	-9.624	-5.553	-6.728	-9.033	-11.185	-13.121	-14.781	-16.108	-17.055	-17.576	-17.636	-17.203	-16.252	-14.762	-12.714	-10.095	-6.893	-3.099	1.296	6.297	11.91	18.14	24.991	32.464	40.563	49.291
2-octanol	123-96-6		-293.171	-280.072	-266.401	-252.171	-237.398	-222.098	-206.293	-190.01	-173.278	-156.137	-138.64	-120.86	-102.905	-84.942	-67.24	-50.222	-34.523	-20.979	-10.46	-3.514	-0.057	0.59	-0.645	-3.839	-7.14	-10.01	-12.421	-14.347	-15.767	-16.664	-17.024	-16.835	-16.089	-14.779	-12.901	-10.452	-7.429	-3.834	0.332	5.066	9.889	14.788	19.587	23.907	27.216	28.849	28.129
tetrahydrofurfurylalcohol	97-99-4	7	-320.804	-308.293	-295.246	-281.672	-267.58	-252.981	-237.89	-222.321	-206.293	-189.832	-172.966	-155.738	-138.203	-120.442	-102.578	-84.802	-67.406	-50.835	-35.712	-22.793	-12.789	-6.073	-2.484	-3.667	-5.947	-8.113	-10.113	-11.895	-13.407	-14.6	-15.43	-15.857	-15.848	-15.372	-14.406	-12.929	-10.922	-8.373	-5.269	-1.602	2.361	6.664	11.252	15.963	20.545	24.621	27.671
glycerol-triacetate	102-76-1	3	-139.563	-135.938	-131.8	-127.161	-122.031	-116.423	-110.352	-103.835	-96.894	-89.555	-81.851	-73.829	-65.546	-57.086	-48.558	-40.111	-31.936	-24.271	-17.388	-11.559	-7.012	-3.87	-2.12	-3.345	-5.344	-7.276	-9.111	-10.814	-12.343	-13.655	-14.707	-15.457	-15.867	-15.901	-15.528	-14.721	-13.456	-11.713	-9.474	-6.724	-3.543	0.137	4.342	9.078	14.352	20.166	26.525
dihydro-5-methyl-2(3h)-furanone	108-29-2	4	-201.18	-194.515	-187.331	-179.641	-171.46	-162.803	-153.688	-144.137	-134.173	-123.824	-113.125	-102.12	-90.865	-79.435	-67.934	-56.505	-45.345	-34.723	-24.973	-16.48	-9.615	-4.637	-1.611	-2.394	-4.259	-6.196	-8.155	-10.077	-11.894	-13.541	-14.952	-16.067	-16.833	-17.206	-17.145	-16.619	-15.601	-14.067	-12.001	-9.387	-6.228	-2.503	1.797	6.68	12.15	18.213	24.872
methyl-tert-amylether	994-05-8		-338.327	-324.585	-310.269	-295.388	-279.953	-263.975	-247.469	-230.452	-212.942	-194.966	-176.553	-157.747	-138.61	-119.236	-99.779	-80.496	-61.812	-44.393	-29.164	-17.138	-9.002	-4.71	-3.499	-5.87	-8.794	-11.382	-13.596	-15.397	-16.753	-17.635	-18.018	-17.882	-17.209	-15.983	-14.191	-11.824	-8.873	-5.33	-1.188	3.556	8.909	14.873	21.452	28.648	36.464	44.902	53.964
benzoicacidphenylmethylester	120-51-4	3	-59.556	-58.408	-56.714	-54.484	-51.733	-48.482	-44.759	-40.601	-36.064	-31.22	-26.17	-21.042	-16.003	-11.252	-7.009	-3.492	-0.882	0.715	1.293	0.948	-0.152	-1.802	-3.793	-6.495	-9.112	-11.366	-13.253	-14.766	-15.899	-16.645	-16.999	-16.954	-16.503	-15.637	-14.351	-12.635	-10.481	-7.881	-4.826	-1.307	2.675	7.133	12.08	17.524	23.472	29.932	36.912
cyclopentyl-methyl-ether	5614-37-9	3	-296.697	-285.186	-273.092	-260.422	-247.187	-233.396	-219.065	-204.211	-188.853	-173.02	-156.747	-140.081	-123.094	-105.889	-88.631	-71.578	-55.134	-39.892	-26.622	-16.125	-8.927	-5.001	-3.774	-6.025	-8.854	-11.366	-13.52	-15.281	-16.614	-17.49	-17.882	-17.767	-17.127	-15.945	-14.207	-11.901	-9.017	-5.547	-1.485	3.176	8.44	14.311	20.794	27.89	35.603	43.935	52.887
dimethyl_adipate	627-93-0	3	-150.364	-146.504	-142.122	-137.225	-131.82	-125.919	-119.532	-112.674	-105.36	-97.614	-89.466	-80.955	-72.137	-63.091	-53.929	-44.802	-35.917	-27.536	-19.972	-13.545	-8.53	-5.079	-3.174	-4.451	-6.53	-8.514	-10.369	-12.052	-13.521	-14.733	-15.643	-16.212	-16.403	-16.181	-15.519	-14.39	-12.772	-10.646	-7.996	-4.807	-1.07	3.227	8.092	13.533	19.557	26.168	33.371
pentanedioicaciddimethylester	1119-40-0	3	-139.81	-136.419	-132.511	-128.092	-123.172	-117.758	-111.863	-105.501	-98.688	-91.448	-83.811	-75.819	-67.529	-59.019	-50.4	-41.822	-33.481	-25.627	-18.547	-12.536	-7.841	-4.601	-2.803	-4.077	-6.131	-8.093	-9.933	-11.614	-13.096	-14.336	-15.294	-15.929	-16.204	-16.084	-15.54	-14.544	-13.072	-11.105	-8.625	-5.617	-2.071	2.026	6.684	11.911	17.716	24.104	31.079
dimethylsuccinate	106-65-0	3	-115.238	-113.028	-110.314	-107.1	-103.392	-99.196	-94.521	-89.379	-83.787	-77.768	-71.353	-64.583	-57.519	-50.239	-42.851	-35.498	-28.362	-21.663	-15.647	-10.558	-6.595	-3.869	-2.373	-3.669	-5.677	-7.592	-9.391	-11.045	-12.517	-13.771	-14.766	-15.463	-15.825	-15.818	-15.408	-14.568	-13.272	-11.498	-9.225	-6.438	-3.143	0.687	5.066	10.005	15.51	21.589	28.248
diethyleneglycolmonobutylether	112-34-5		-337.25	-323.143	-308.584	-293.577	-278.128	-262.247	-245.943	-229.227	-212.114	-194.625	-176.785	-158.634	-140.225	-121.645	-103.024	-84.575	-66.63	-49.698	-34.481	-21.8	-12.348	-6.367	-3.502	-5.046	-7.51	-9.777	-11.801	-13.536	-14.938	-15.968	-16.592	-16.778	-16.5	-15.735	-14.464	-12.672	-10.343	-7.468	-4.036	-0.04	4.392	9.286	14.619	20.318	26.265	32.277	38.077
dimethylcarbonate	616-38-6		-105.874	-103.891	-101.424	-98.476	-95.054	-91.162	-86.813	-82.018	-76.796	-71.174	-65.183	-58.869	-52.293	-45.535	-38.699	-31.924	-25.376	-19.258	-13.786	-9.177	-5.605	-3.167	-1.861	-3.168	-5.161	-7.09	-8.933	-10.659	-12.228	-13.597	-14.723	-15.56	-16.066	-16.202	-15.931	-15.222	-14.047	-12.381	-10.204	-7.498	-4.258	-0.465	3.895	8.832	14.353	20.466	27.176
n,n-dimethyldecanamid	14433-76-2	3	-371.125	-356.109	-340.631	-324.699	-308.321	-291.501	-274.247	-256.565	-238.459	-219.936	-201.007	-181.684	-161.993	-141.975	-121.712	-101.35	-81.163	-61.633	-43.544	-27.992	-16.126	-8.581	-5.054	-6.48	-8.907	-11.162	-13.17	-14.867	-16.196	-17.112	-17.577	-17.561	-17.04	-15.994	-14.409	-12.273	-9.577	-6.314	-2.479	1.932	6.924	12.498	18.656	25.401	32.734	40.655	49.167
n,n-dimethyloctanamide	1118-92-9	2	-376.09	-361.055	-345.559	-329.609	-313.21	-296.37	-279.093	-261.384	-243.25	-224.695	-205.73	-186.367	-166.629	-146.556	-126.22	-105.754	-85.404	-65.607	-47.085	-30.884	-18.176	-9.737	-5.45	-6.561	-8.832	-10.979	-12.925	-14.598	-15.938	-16.893	-17.421	-17.486	-17.063	-16.128	-14.664	-12.659	-10.1	-6.981	-3.294	0.967	5.804	11.222	17.224	23.811	30.986	38.75	47.105
dioxolane	646-06-0	3	-191.431	-186.186	-180.353	-173.939	-166.951	-159.398	-151.29	-142.642	-133.469	-123.795	-113.647	-103.065	-92.103	-80.84	-69.383	-57.889	-46.577	-35.741	-25.754	-17.039	-9.997	-4.898	-1.795	-2.745	-4.758	-6.737	-8.655	-10.476	-12.156	-13.647	-14.899	-15.863	-16.494	-16.748	-16.589	-15.983	-14.9	-13.317	-11.212	-8.568	-5.374	-1.615	2.722	7.646	13.163	19.282	26.007
1,2-ethanedioldiacetate	111-55-7		-152.786	-148.552	-143.803	-138.548	-132.798	-126.566	-119.867	-112.716	-105.136	-97.151	-88.796	-80.115	-71.167	-62.034	-52.827	-43.697	-34.843	-26.512	-18.995	-12.588	-7.546	-4.012	-1.98	-3.118	-5.092	-7.016	-8.862	-10.591	-12.16	-13.524	-14.637	-15.455	-15.938	-16.049	-15.755	-15.026	-13.838	-12.169	-10	-7.317	-4.158	-0.479	3.743	8.514	13.841	19.731	26.189
hexamethyldisiloxane	107-46-0		-131.072	-124.181	-116.849	-109.092	-100.924	-92.364	-83.433	-74.163	-64.596	-54.798	-44.867	-34.95	-25.266	-16.121	-7.909	-1.079	3.962	6.973	7.977	7.255	5.248	2.425	-0.801	-4.618	-8.179	-11.217	-13.721	-15.682	-17.092	-17.942	-18.226	-17.938	-17.073	-15.626	-13.592	-10.967	-7.748	-3.933	0.483	5.502	11.126	17.358	24.199	31.652	39.719	48.401	57.7
isoamylacetate	123-92-2	3	-181.179	-175.318	-168.934	-162.036	-154.634	-146.739	-138.365	-129.528	-120.246	-110.545	-100.458	-90.033	-79.337	-68.468	-57.569	-46.846	-36.583	-27.144	-18.947	-12.39	-7.734	-5.016	-4.026	-5.898	-8.36	-10.614	-12.612	-14.31	-15.663	-16.634	-17.188	-17.296	-16.932	-16.074	-14.704	-12.808	-10.373	-7.387	-3.844	0.265	4.942	10.194	16.025	22.44	29.439	37.027	45.204
aceticacid-2-methylpropylester	110-19-0	3	-174.562	-169.595	-164.062	-157.973	-151.336	-144.161	-136.461	-128.25	-119.545	-110.371	-100.759	-90.752	-80.414	-69.837	-59.155	-48.561	-38.326	-28.802	-20.404	-13.546	-8.533	-5.455	-4.153	-5.885	-8.278	-10.486	-12.461	-14.154	-15.521	-16.519	-17.113	-17.27	-16.962	-16.165	-14.861	-13.033	-10.666	-7.75	-4.276	-0.235	4.375	9.56	15.328	21.679	28.619	36.149	44.271
methyl-5-(dimethylamino)-2-methyl-5-oxopentanoate	1174627-68-9	2	-345.156	-330.591	-315.612	-300.23	-284.458	-268.309	-251.796	-234.935	-217.742	-200.238	-182.448	-164.408	-146.164	-127.788	-109.386	-91.124	-73.259	-56.183	-40.459	-26.797	-15.917	-8.283	-3.866	-4.567	-6.547	-8.517	-10.413	-12.171	-13.728	-15.026	-16.01	-16.635	-16.859	-16.649	-15.974	-14.812	-13.141	-10.946	-8.211	-4.927	-1.085	3.323	8.306	13.869	20.017	26.754	34.084
1,1,1,3,3-pentafluorobutane	406-58-6		212.785	196.325	180.512	165.343	150.817	136.932	123.685	111.075	99.097	87.75	77.029	66.931	57.451	48.585	40.326	32.669	25.606	19.13	13.231	7.9	3.126	-1.104	-4.803	-7.986	-10.669	-12.868	-14.603	-15.891	-16.752	-17.204	-17.268	-16.96	-16.295	-15.288	-13.949	-12.284	-10.298	-7.99	-5.355	-2.388	0.173	2.717	5.382	8.175	11.106	14.194	17.459
PDMS	63148-62-9		-692.911	-658.736	-623.942	-588.537	-552.532	-515.942	-478.781	-441.071	-402.836	-364.109	-324.929	-285.349	-245.444	-205.328	-165.2	-125.472	-87.063	-52.001	-23.9	-6.346	0.865	1.537	-0.731	-4.527	-8.154	-11.251	-13.806	-15.805	-17.241	-18.104	-18.387	-18.085	-17.193	-15.705	-13.619	-10.931	-7.638	-3.738	0.772	5.894	11.629	17.979	24.946	32.532	40.736	49.562	59.01
1-nonene	124-11-8		212.994	198.716	184.882	171.482	158.511	145.963	133.834	122.122	110.827	99.951	89.496	79.468	69.873	60.718	52.013	43.767	35.99	28.691	21.882	15.572	9.772	4.491	-0.261	-4.517	-8.23	-11.377	-13.954	-15.958	-17.382	-18.225	-18.482	-18.15	-17.225	-15.705	-13.587	-10.868	-7.546	-3.619	0.914	6.056	11.809	18.173	25.151	32.742	40.949	49.772	59.213
2-ethyl-1-hexanol	104-76-7		-262.811	-250.19	-237.057	-223.428	-209.32	-194.751	-179.745	-164.328	-148.534	-132.407	-116.005	-99.415	-82.772	-66.285	-50.289	-35.286	-21.967	-11.124	-3.402	1.01	2.495	1.813	-0.213	-3.652	-7.053	-9.987	-12.433	-14.372	-15.787	-16.665	-16.997	-16.774	-15.99	-14.641	-12.725	-10.241	-7.19	-3.574	0.603	5.336	9.965	14.443	18.489	21.549	22.894	21.742	17.509
2-nitropropane	79-46-9		42.047	37.368	33.171	29.429	26.115	23.197	20.643	18.414	16.471	14.773	13.276	11.938	10.714	9.562	8.443	7.319	6.158	4.936	3.631	2.234	0.743	-0.836	-2.487	-4.654	-6.823	-8.783	-10.528	-12.047	-13.321	-14.329	-15.042	-15.433	-15.473	-15.132	-14.383	-13.2	-11.559	-9.438	-6.819	-3.685	-0.047	4.124	8.843	14.12	19.962	26.375	33.365
4-oh-4-me-2-pentanone	123-42-2		-372.37	-357.06	-341.176	-324.728	-307.729	-290.193	-272.137	-253.585	-234.563	-215.107	-195.262	-175.085	-154.657	-134.088	-113.535	-93.238	-73.554	-55.009	-38.322	-24.328	-13.736	-6.809	-3.201	-4.292	-6.447	-8.507	-10.423	-12.146	-13.628	-14.822	-15.688	-16.187	-16.286	-15.958	-15.177	-13.924	-12.181	-9.932	-7.167	-3.875	-0.12	4.136	8.899	14.151	19.861	25.97	32.376
isophorone	78-59-1		-326.308	-313.552	-300.262	-286.45	-272.129	-257.316	-242.029	-226.289	-210.122	-193.558	-176.633	-159.391	-141.891	-124.212	-106.467	-88.824	-71.545	-55.026	-39.836	-26.693	-16.322	-9.175	-5.194	-6.06	-8.098	-10.087	-11.956	-13.637	-15.062	-16.174	-16.921	-17.261	-17.155	-16.576	-15.498	-13.901	-11.77	-9.092	-5.857	-2.055	2.319	7.272	12.808	18.932	25.646	32.954	40.859
methyloleate	112-62-9	3	-121.298	-117.169	-112.501	-107.302	-101.583	-95.359	-88.645	-81.465	-73.852	-65.85	-57.524	-48.971	-40.328	-31.789	-23.615	-16.135	-9.717	-4.709	-1.342	0.34	0.502	-0.541	-2.411	-5.499	-8.592	-11.282	-13.543	-15.35	-16.682	-17.521	-17.85	-17.656	-16.927	-15.654	-13.829	-11.445	-8.497	-4.98	-0.891	3.774	9.016	14.838	21.241	28.226	35.794	43.945	52.681
dimethoxymethane	109-87-5		-238.052	-230.496	-222.342	-213.597	-204.271	-194.375	-183.922	-172.928	-161.41	-149.393	-136.905	-123.987	-110.694	-97.105	-83.333	-69.55	-56.007	-43.059	-31.178	-20.915	-12.79	-7.119	-3.885	-5.051	-7.273	-9.374	-11.313	-13.048	-14.532	-15.719	-16.566	-17.033	-17.083	-16.685	-15.81	-14.434	-12.536	-10.098	-7.107	-3.548	0.589	5.312	10.63	16.548	23.074	30.21	37.962
tetrachloroethene	127-18-4	5	255.749	237.577	220.033	203.117	186.828	171.164	156.126	141.713	127.923	114.757	102.213	90.29	78.988	68.306	58.242	48.796	39.966	31.752	24.153	17.167	10.794	5.032	-0.121	-4.664	-8.601	-11.931	-14.656	-16.777	-18.296	-19.215	-19.533	-19.253	-18.376	-16.904	-14.837	-12.176	-8.924	-5.08	-0.647	4.375	9.984	16.18	22.962	30.329	38.281	46.816	55.935
beta-pinene	127-91-3	5	177.942	167.204	156.779	146.633	136.736	127.06	117.585	108.295	99.181	90.243	81.49	72.935	64.599	56.508	48.691	41.177	33.998	27.183	20.761	14.758	9.199	4.104	-0.505	-4.685	-8.348	-11.456	-14.003	-15.985	-17.397	-18.235	-18.494	-18.17	-17.261	-15.762	-13.67	-10.983	-7.697	-3.81	0.68	5.776	11.479	17.792	24.716	32.253	40.404	49.171	58.555
gamma-butyrolactone	96-48-0		-187.557	-181.532	-174.991	-167.945	-160.41	-152.399	-143.931	-135.026	-125.706	-116	-105.941	-95.57	-84.943	-74.131	-63.231	-52.377	-41.751	-31.598	-22.226	-13.993	-7.257	-2.295	0.786	0.036	-1.862	-3.896	-6.024	-8.183	-10.303	-12.31	-14.129	-15.692	-16.938	-17.812	-18.271	-18.274	-17.791	-16.797	-15.269	-13.192	-10.572	-7.383	-3.613	0.747	5.703	11.258	17.419
((1,1-dimethylethoxy)methyl)oxirane	7665-72-7		-260.39	-250.387	-239.85	-228.793	-217.232	-205.185	-192.673	-179.721	-166.358	-152.618	-138.544	-124.192	-109.635	-94.973	-80.35	-65.972	-52.133	-39.234	-27.771	-18.265	-11.127	-6.493	-4.163	-5.591	-7.865	-9.983	-11.905	-13.584	-14.977	-16.04	-16.735	-17.026	-16.882	-16.277	-15.187	-13.594	-11.481	-8.835	-5.645	-1.901	2.403	7.274	12.719	18.741	25.345	32.535	40.312
(1,1-dimethylethyl)benzene	98-06-6		206.038	190.926	176.387	162.416	149.008	136.157	123.857	112.103	100.889	90.208	80.056	70.426	61.312	52.709	44.611	37.014	29.914	23.306	17.188	11.556	6.409	1.746	-2.435	-6.132	-9.345	-12.072	-14.312	-16.061	-17.316	-18.074	-18.331	-18.082	-17.323	-16.05	-14.257	-11.94	-9.095	-5.716	-1.799	2.66	7.665	13.221	19.332	26.001	33.232	41.028	49.393
(1-methylvinyl)cyclopropane	4663-22-3		166.603	155.068	143.959	133.26	122.957	113.034	103.479	94.281	85.428	76.915	68.733	60.882	53.359	46.166	39.306	32.784	26.607	20.784	15.323	10.235	5.53	1.219	-2.686	-6.278	-9.445	-12.139	-14.356	-16.093	-17.344	-18.105	-18.368	-18.129	-17.38	-16.115	-14.328	-12.012	-9.16	-5.767	-1.825	2.671	7.727	13.348	19.539	26.306	33.653	41.585	50.106
(1-methylethyl)-cyclopentane	3875-51-2		268.648	249.781	231.558	213.977	197.037	180.74	165.085	150.072	135.7	121.97	108.88	96.433	84.626	73.46	62.935	53.05	43.807	35.204	27.241	19.919	13.238	7.197	1.796	-2.964	-7.084	-10.564	-13.403	-15.602	-17.161	-18.079	-18.357	-17.994	-16.991	-15.347	-13.062	-10.136	-6.57	-2.363	2.486	7.975	14.106	20.879	28.292	36.348	45.045	54.385	64.366
(2-propenyloxy)methyl-oxirane	106-92-3		-187.103	-180.501	-173.364	-165.707	-157.545	-148.896	-139.782	-130.229	-120.268	-109.939	-99.294	-88.4	-77.348	-66.259	-55.3	-44.69	-34.705	-25.672	-17.93	-11.765	-7.338	-4.63	-3.447	-5.001	-7.16	-9.166	-10.994	-12.617	-14.003	-15.118	-15.929	-16.402	-16.505	-16.21	-15.488	-14.316	-12.672	-10.538	-7.895	-4.729	-1.032	3.211	8.011	13.374	19.311	25.826	32.926
(2-methyl-1-propenyl)benzene	786-49-0		202.715	187.546	172.968	158.978	145.57	132.74	120.483	108.792	97.663	87.088	77.061	67.576	58.625	50.201	42.297	34.907	28.021	21.634	15.739	10.33	5.4	0.945	-3.039	-6.556	-9.609	-12.199	-14.326	-15.989	-17.188	-17.92	-18.181	-17.968	-17.274	-16.096	-14.426	-12.26	-9.589	-6.409	-2.711	1.51	6.261	11.548	17.377	23.755	30.686	38.175	46.229
(3-chloropropyl)trimethoxy-silane	2530-87-2		-168.515	-161.572	-154.118	-146.166	-137.732	-128.837	-119.508	-109.78	-99.696	-89.319	-78.73	-68.039	-57.397	-47.003	-37.111	-28.022	-20.065	-13.535	-8.631	-5.395	-3.7	-3.292	-3.853	-6.133	-8.63	-10.821	-12.697	-14.248	-15.462	-16.321	-16.811	-16.912	-16.607	-15.878	-14.706	-13.075	-10.967	-8.368	-5.263	-1.639	2.509	7.195	12.432	18.226	24.587	31.52	39.032
(3-chloropropyl)dimethylchlorosilane	10605-40-0		192.626	177.629	163.251	149.486	136.331	123.78	111.83	100.473	89.705	79.517	69.903	60.854	52.361	44.415	37.005	30.121	23.75	17.882	12.503	7.602	3.166	-0.816	-4.356	-7.464	-10.149	-12.418	-14.276	-15.728	-16.775	-17.416	-17.649	-17.469	-16.869	-15.843	-14.379	-12.469	-10.101	-7.265	-3.947	-0.139	4.166	8.982	14.32	20.19	26.601	33.561	41.078
(chloromethyl)-oxirane	106-89-8		-87.977	-85.044	-81.623	-77.732	-73.396	-68.643	-63.511	-58.044	-52.301	-46.356	-40.302	-34.256	-28.357	-22.766	-17.654	-13.188	-9.507	-6.699	-4.784	-3.714	-3.383	-3.651	-4.366	-6.105	-7.935	-9.529	-10.899	-12.054	-12.996	-13.725	-14.233	-14.511	-14.541	-14.304	-13.778	-12.938	-11.757	-10.211	-8.272	-5.917	-3.363	-0.438	2.926	6.746	11.039	15.818	21.096
(c-chloroethoxy)ethene	110-75-8		59.586	55.549	51.91	48.621	45.623	42.853	40.241	37.715	35.208	32.654	30.006	27.227	24.306	21.248	18.078	14.837	11.573	8.34	5.189	2.17	-0.676	-3.314	-5.719	-8.141	-10.295	-12.078	-13.506	-14.595	-15.357	-15.804	-15.943	-15.777	-15.307	-14.53	-13.437	-12.019	-10.261	-8.148	-5.662	-2.785	0.308	3.753	7.606	11.883	16.602	21.778	27.426
(chloromethyl)-benzene	100-44-7		187.554	172.78	158.608	145.038	132.065	119.686	107.898	96.697	86.078	76.037	66.568	57.666	49.322	41.531	34.284	27.571	21.384	15.711	10.541	5.861	1.659	-2.079	-5.367	-8.219	-10.649	-12.672	-14.298	-15.541	-16.41	-16.913	-17.056	-16.842	-16.271	-15.341	-14.047	-12.382	-10.337	-7.901	-5.062	-1.806	1.784	5.778	10.208	15.088	20.429	26.242	32.539
(dichloromethyl)-benzene	98-87-3		208.302	192.362	177.035	162.32	148.216	134.72	121.83	109.545	97.86	86.773	76.281	66.38	57.067	48.336	40.183	32.603	25.59	19.137	13.238	7.883	3.066	-1.223	-4.994	-8.258	-11.025	-13.307	-15.118	-16.468	-17.372	-17.842	-17.891	-17.531	-16.774	-15.629	-14.107	-12.215	-9.958	-7.341	-4.366	-1.032	2.138	5.368	8.72	12.165	15.675	19.229	22.811
(chloromethyl)cyclopropane	5911-08-0		185.071	170.494	156.529	143.17	130.415	118.257	106.691	95.711	85.31	75.482	66.217	57.508	49.344	41.716	34.613	28.022	21.933	16.332	11.205	6.541	2.325	-1.455	-4.812	-7.756	-10.298	-12.445	-14.204	-15.58	-16.574	-17.186	-17.413	-17.25	-16.691	-15.726	-14.346	-12.539	-10.294	-7.597	-4.437	-0.801	3.296	7.883	12.976	18.584	24.719	31.388	38.601
(dichloromethyl)dimethylchlorosilane	18171-59-0		215.533	199.268	183.625	168.601	154.194	140.401	127.219	114.645	102.676	91.308	80.537	70.36	60.771	51.766	43.34	35.487	28.201	21.476	15.306	9.683	4.601	0.051	-3.974	-7.482	-10.482	-12.983	-14.991	-16.518	-17.569	-18.155	-18.283	-17.96	-17.195	-15.992	-14.359	-12.301	-9.821	-6.925	-3.615	0.108	3.759	7.525	11.449	15.488	19.599	23.744	27.893
(e)-(1-methyl-1-propenyl)benzene	768-00-3		203.303	188.102	173.494	159.473	146.036	133.176	120.889	109.17	98.013	87.411	77.358	67.847	58.872	50.425	42.499	35.088	28.183	21.778	15.866	10.441	5.498	1.031	-2.965	-6.492	-9.554	-12.152	-14.286	-15.958	-17.165	-17.905	-18.175	-17.972	-17.29	-16.125	-14.472	-12.324	-9.675	-6.518	-2.849	1.341	6.057	11.306	17.092	23.423	30.303	37.738	45.733
(e)-1-propenylbenzene	637-50-3		199.532	184.409	169.884	155.953	142.612	129.858	117.684	106.086	95.058	84.594	74.688	65.333	56.522	48.246	40.499	33.271	26.555	20.342	14.623	9.39	4.634	0.349	-3.474	-6.84	-9.755	-12.224	-14.25	-15.834	-16.978	-17.681	-17.942	-17.757	-17.123	-16.034	-14.485	-12.468	-9.977	-7.004	-3.542	0.419	4.884	9.863	15.362	21.39	27.954	35.06	42.714
(e)-1,3-hexadiene	20237-34-7		207.534	192.247	177.547	163.428	149.887	136.915	124.508	112.659	101.362	90.609	80.394	70.711	61.552	52.912	44.783	37.161	30.039	23.413	17.278	11.631	6.47	1.793	-2.402	-6.116	-9.348	-12.093	-14.349	-16.113	-17.382	-18.149	-18.412	-18.163	-17.398	-16.112	-14.297	-11.948	-9.06	-5.626	-1.641	2.9	8.002	13.672	19.913	26.729	34.126	42.107	50.676
(e)-2-decene	20063-97-2		219.624	205.252	191.266	177.662	164.439	151.597	139.141	127.075	115.408	104.147	93.305	82.892	72.921	63.404	54.355	45.785	37.707	30.133	23.074	16.54	10.541	5.085	0.182	-4.192	-8	-11.226	-13.865	-15.915	-17.371	-18.232	-18.494	-18.154	-17.21	-15.66	-13.501	-10.732	-7.35	-3.354	1.259	6.489	12.338	18.807	25.897	33.61	41.947	50.909	60.496
(e)-2-butenenitrile	627-26-9		-151.645	-146.885	-141.576	-135.728	-129.358	-122.48	-115.115	-107.29	-99.036	-90.394	-81.419	-72.181	-62.775	-53.327	-44.003	-35.014	-26.616	-19.098	-12.741	-7.772	-4.305	-2.307	-1.614	-3.19	-5.298	-7.319	-9.22	-10.968	-12.522	-13.843	-14.892	-15.633	-16.03	-16.053	-15.676	-14.874	-13.628	-11.918	-9.731	-7.053	-4.091	-0.714	3.123	7.421	12.182	17.405	23.091
(e)-2-heptenoic-acid	18999-28-5		-116.03	-112.504	-108.468	-103.931	-98.9	-93.39	-87.414	-80.995	-74.162	-66.954	-59.427	-51.66	-43.762	-35.884	-28.225	-21.038	-14.611	-9.239	-5.165	-2.514	-1.26	-1.226	-2.14	-4.698	-7.443	-9.855	-11.905	-13.566	-14.813	-15.623	-15.979	-15.863	-15.261	-14.164	-12.561	-10.447	-7.816	-4.668	-1.001	3.183	7.111	10.509	12.658	12.208	7.441	-2.971	-19.013
(e)-3-methyl-2-pentene	616-12-6		187.548	175.859	164.499	153.447	142.682	132.187	121.95	111.963	102.224	92.735	83.504	74.544	65.87	57.502	49.462	41.771	34.453	27.53	21.025	14.957	9.346	4.211	-0.434	-4.644	-8.335	-11.471	-14.046	-16.055	-17.495	-18.359	-18.644	-18.346	-17.461	-15.986	-13.916	-11.249	-7.982	-4.111	0.365	5.449	11.143	17.449	24.37	31.907	40.061	48.835	58.229
(e)-4-octene	14850-23-8		216.921	203.003	189.413	176.15	163.217	150.619	138.363	126.462	114.926	103.771	93.012	82.664	72.743	63.264	54.244	45.696	37.636	30.074	23.025	16.498	10.504	5.052	0.151	-4.221	-8.028	-11.254	-13.895	-15.947	-17.407	-18.272	-18.54	-18.206	-17.27	-15.727	-13.577	-10.816	-7.443	-3.455	1.148	6.37	12.211	18.672	25.756	33.464	41.796	50.755	60.34
(e)-5-undecene	764-97-6		229.266	214.149	199.433	185.118	171.208	157.708	144.626	131.97	119.75	107.976	96.66	85.813	75.447	65.573	56.202	47.345	39.012	31.212	23.956	17.249	11.102	5.519	0.508	-3.945	-7.817	-11.094	-13.775	-15.855	-17.334	-18.208	-18.474	-18.132	-17.178	-15.611	-13.429	-10.631	-7.215	-3.179	1.478	6.757	12.659	19.185	26.337	34.115	42.521	51.555	61.217
(e,z)-2,4-hexadiene	5194-50-3		197.682	183.077	169.042	155.572	142.661	130.301	118.486	107.208	96.46	86.233	76.519	67.31	58.598	50.376	42.635	35.369	28.571	22.237	16.362	10.943	5.977	1.465	-2.594	-6.217	-9.383	-12.083	-14.31	-16.061	-17.328	-18.107	-18.389	-18.167	-17.435	-16.183	-14.405	-12.093	-9.24	-5.84	-1.884	2.632	7.714	13.369	19.602	26.417	33.818	41.811	50.398
(trichloromethyl)-benzene	98-07-7		225.541	208.889	192.849	177.418	162.595	148.379	134.767	121.758	109.349	97.539	86.325	75.704	65.673	56.229	47.369	39.089	31.385	24.254	17.689	11.688	6.244	1.353	-2.992	-6.795	-10.064	-12.804	-15.022	-16.724	-17.917	-18.607	-18.8	-18.502	-17.718	-16.454	-14.714	-12.501	-9.82	-6.671	-3.056	1.025	5.515	10.449	15.839	21.687	27.998	34.774	42.02
(methylthio)-ethane	624-89-5		-36.288	-36.982	-37.138	-36.77	-35.893	-34.529	-32.705	-30.454	-27.82	-24.857	-21.638	-18.249	-14.802	-11.425	-8.265	-5.478	-3.212	-1.588	-0.682	-0.507	-1.016	-2.107	-3.643	-6.218	-8.853	-11.179	-13.178	-14.831	-16.115	-17.009	-17.49	-17.537	-17.13	-16.248	-14.875	-12.995	-10.592	-7.655	-4.171	-0.131	4.474	9.652	15.41	21.753	28.687	36.215	44.343
(ethylthio)aceticacid	627-04-3		-89.616	-86.024	-82.141	-77.971	-73.519	-68.793	-63.809	-58.588	-53.158	-47.563	-41.858	-36.118	-30.436	-24.929	-19.731	-14.99	-10.853	-7.449	-4.866	-3.14	-2.239	-2.078	-2.527	-4.387	-6.469	-8.323	-9.938	-11.301	-12.396	-13.205	-13.71	-13.891	-13.73	-13.209	-12.311	-11.022	-9.327	-7.214	-4.675	-1.699	0.68	2.344	2.651	0.317	-6.279	-18.392	-36.037
(propylthio)benzene	874-79-3		179.387	166.368	153.804	141.695	130.04	118.839	108.092	97.8	87.961	78.575	69.642	61.16	53.128	45.543	38.403	31.705	25.446	19.623	14.232	9.27	4.734	0.621	-3.071	-6.381	-9.275	-11.738	-13.772	-15.376	-16.55	-17.291	-17.597	-17.462	-16.882	-15.851	-14.361	-12.407	-9.98	-7.074	-3.679	0.21	4.595	9.486	14.894	20.823	27.281	34.274	41.808
(z)-1,2-dimethylcyclopentane	1192-18-3		268.46	249.597	231.377	213.8	196.865	180.573	164.922	149.914	135.547	121.822	108.738	96.296	84.495	73.334	62.815	52.936	43.698	35.1	27.143	19.826	13.15	7.114	1.718	-3.038	-7.154	-10.629	-13.465	-15.66	-17.215	-18.13	-18.404	-18.039	-17.033	-15.386	-13.1	-10.172	-6.604	-2.395	2.455	7.946	14.078	20.851	28.266	36.323	45.021	54.361	64.343
(z)-1,3-dimethylcyclopentane	2532-58-3		268.745	249.87	231.638	214.048	197.101	180.797	165.135	150.115	135.737	122	108.906	96.453	84.641	73.471	62.941	53.053	43.806	35.2	27.235	19.91	13.227	7.184	1.781	-2.98	-7.101	-10.582	-13.421	-15.62	-17.179	-18.096	-18.373	-18.01	-17.005	-15.359	-13.073	-10.145	-6.576	-2.366	2.485	7.977	14.112	20.887	28.305	36.364	45.066	54.41	64.396
(z)-2-butenedioicaciddibutylester	105-76-0		-101.96	-99.33	-96.214	-92.623	-88.568	-84.064	-79.129	-73.784	-68.06	-61.992	-55.632	-49.045	-42.322	-35.581	-28.976	-22.698	-16.968	-12.019	-8.063	-5.242	-3.6	-3.062	-3.457	-5.68	-8.208	-10.472	-12.441	-14.085	-15.375	-16.284	-16.786	-16.859	-16.485	-15.645	-14.328	-12.52	-10.212	-7.398	-4.071	-0.227	3.989	8.644	13.757	19.316	25.308	31.717	38.527
(z)-2-hexene	7688-21-3		178.432	167.161	156.247	145.666	135.395	125.414	115.705	106.253	97.05	88.091	79.377	70.912	62.708	54.779	47.144	39.821	32.835	26.207	19.961	14.119	8.703	3.733	-0.771	-4.888	-8.509	-11.585	-14.11	-16.078	-17.485	-18.325	-18.592	-18.283	-17.391	-15.914	-13.848	-11.187	-7.929	-4.071	0.391	5.459	11.137	17.425	24.328	31.846	39.982	48.737	58.113
(z)-2-methyl-2-pentenal	623-36-9		-231.911	-223.539	-214.647	-205.25	-195.36	-184.995	-174.172	-162.91	-151.235	-139.173	-126.759	-114.037	-101.069	-87.939	-74.772	-61.749	-49.136	-37.295	-26.69	-17.82	-11.101	-6.714	-4.521	-5.908	-8.129	-10.231	-12.159	-13.856	-15.269	-16.349	-17.052	-17.341	-17.184	-16.552	-15.425	-13.783	-11.612	-8.899	-5.634	-1.81	2.579	7.539	13.074	19.188	25.885	33.166	41.034
(z)-2-octene	7642-04-08		189.372	177.621	166.205	155.097	144.277	133.726	123.43	113.38	103.571	94.008	84.696	75.649	66.885	58.424	50.288	42.502	35.091	28.079	21.489	15.343	9.662	4.464	-0.233	-4.49	-8.218	-11.38	-13.972	-15.988	-17.424	-18.276	-18.54	-18.213	-17.291	-15.771	-13.65	-10.926	-7.595	-3.656	0.893	6.055	11.831	18.223	25.232	32.861	41.109	49.978	59.47
(z,z)-9,12-octadecadienoicacid	60-33-3		-69.21	-66.397	-63.102	-59.339	-55.128	-50.494	-45.468	-40.096	-34.437	-28.574	-22.616	-16.711	-11.045	-5.844	-1.355	2.184	4.59	5.779	5.79	4.778	2.97	0.622	-2.023	-5.272	-8.36	-11.017	-13.224	-14.966	-16.227	-16.996	-17.26	-17.01	-16.239	-14.939	-13.107	-10.737	-7.83	-4.384	-0.401	4.114	8.487	12.377	14.981	14.807	9.945	-0.998	-17.827
(z)-4,4-dimethyl-2-pentene	762-63-0		224.192	209.011	194.289	180.023	166.214	152.862	139.968	127.536	115.568	104.068	93.042	82.494	72.432	62.86	53.787	45.217	37.159	29.62	22.605	16.121	10.176	4.774	-0.077	-4.399	-8.162	-11.351	-13.962	-15.992	-17.439	-18.299	-18.569	-18.247	-17.33	-15.814	-13.699	-10.981	-7.659	-3.729	0.809	5.959	11.721	18.098	25.091	32.701	40.931	49.781	59.253
(z)-5-undecene	764-96-5		193.88	182.429	171.227	160.246	149.464	138.866	128.442	118.192	108.124	98.253	88.599	79.189	70.052	61.221	52.726	44.6	36.872	29.569	22.716	16.338	10.452	5.078	0.231	-4.134	-7.947	-11.179	-13.824	-15.879	-17.34	-18.204	-18.469	-18.13	-17.186	-15.634	-13.472	-10.697	-7.307	-3.302	1.322	6.565	12.429	18.916	26.026	33.76	42.121	51.108	60.722
1,1'-bicyclohexyl-2-one	90-42-6		-225.805	-217.019	-207.711	-197.895	-187.589	-176.811	-165.583	-153.931	-141.885	-129.479	-116.758	-103.781	-90.628	-77.412	-64.302	-51.539	-39.467	-28.529	-19.231	-12.031	-7.179	-4.61	-3.957	-6.096	-8.741	-11.125	-13.199	-14.917	-16.238	-17.126	-17.551	-17.485	-16.908	-15.801	-14.149	-11.94	-9.165	-5.815	-1.883	2.634	7.742	13.445	19.743	26.641	34.139	42.24	50.943
1,1'-butylidenebisbenzene	719-79-9		196.691	181.93	167.745	154.132	141.086	128.603	116.677	105.302	94.474	84.186	74.431	65.204	56.497	48.303	40.616	33.429	26.735	20.527	14.799	9.545	4.76	0.439	-3.423	-6.829	-9.781	-12.282	-14.331	-15.93	-17.077	-17.77	-18.006	-17.783	-17.096	-15.94	-14.311	-12.203	-9.61	-6.526	-2.944	1.14	5.733	10.841	16.47	22.626	29.314	36.539	44.308
1,1'-methylenebis(oxy)bisbutane	2568-90-3		-222.435	-213.698	-204.404	-194.566	-184.195	-173.307	-161.919	-150.055	-137.74	-125.012	-111.917	-98.524	-84.928	-71.276	-57.783	-44.765	-32.663	-22.023	-13.414	-7.256	-3.646	-2.305	-2.699	-5.486	-8.56	-11.243	-13.507	-15.326	-16.678	-17.541	-17.896	-17.728	-17.023	-15.769	-13.955	-11.574	-8.618	-5.081	-0.957	3.757	9.066	14.973	21.48	28.59	36.304	44.625	53.554
1,1'-methylenebis(oxy)bispropane	505-84-0		-236.361	-227.415	-217.905	-207.843	-197.239	-186.108	-174.467	-162.337	-149.742	-136.716	-123.301	-109.555	-95.561	-81.444	-67.386	-53.661	-40.656	-28.887	-18.939	-11.334	-6.33	-3.807	-3.307	-5.74	-8.637	-11.19	-13.369	-15.142	-16.483	-17.366	-17.768	-17.67	-17.053	-15.904	-14.21	-11.959	-9.142	-5.752	-1.781	2.776	7.924	13.668	20.009	26.952	34.5	42.653	51.415
1,1'-oxybis-octane	629-82-3		-272.83	-260.162	-246.939	-233.166	-218.851	-204.001	-188.63	-172.752	-156.39	-139.574	-122.352	-104.801	-87.049	-69.311	-51.957	-35.577	-21.031	-9.342	-1.339	2.796	3.656	2.257	-0.411	-4.223	-7.869	-10.992	-13.573	-15.597	-17.053	-17.931	-18.221	-17.916	-17.01	-15.498	-13.375	-10.638	-7.284	-3.31	1.287	6.507	12.353	18.826	25.928	33.659	42.021	51.014	60.639
1,1'-thiobis2-methylpropane	592-65-4		11.508	11.258	11.433	11.998	12.905	14.1	15.512	17.057	18.634	20.124	21.398	22.317	22.751	22.591	21.769	20.268	18.125	15.429	12.301	8.881	5.31	1.722	-1.767	-5.386	-8.698	-11.535	-13.886	-15.74	-17.086	-17.914	-18.216	-17.981	-17.203	-15.874	-13.988	-11.537	-8.518	-4.924	-0.752	4.002	9.342	15.271	21.792	28.909	36.622	44.934	53.848
1,1'-thiobispropane	111-47-7		-17.498	-18.094	-18.183	-17.785	-16.921	-15.622	-13.926	-11.879	-9.543	-6.994	-4.328	-1.662	0.869	3.114	4.921	6.153	6.708	6.538	5.66	4.15	2.133	-0.242	-2.82	-5.974	-8.993	-11.608	-13.804	-15.562	-16.865	-17.696	-18.039	-17.881	-17.207	-16.006	-14.266	-11.977	-9.131	-5.72	-1.737	2.824	7.968	13.7	20.025	26.946	34.466	42.588	51.314
1,1,1,2-tetrachloroethane	630-20-6		227.171	210.321	194.088	178.471	163.468	149.078	135.3	122.133	109.574	97.623	86.278	75.536	65.396	55.855	46.911	38.561	30.801	23.63	17.041	11.033	5.599	0.735	-3.566	-7.31	-10.505	-13.158	-15.28	-16.879	-17.969	-18.562	-18.67	-18.31	-17.497	-16.247	-14.579	-12.51	-10.058	-7.24	-4.071	-0.566	2.266	4.854	7.339	9.696	11.923	14.041	16.089
1,1,1-trichloro-2,2,3,3,3-pentafluoropropane	4259-43-2		269.072	249.999	231.582	213.822	196.718	180.27	164.477	149.339	134.854	121.023	107.845	95.319	83.445	72.221	61.647	51.723	42.446	33.817	25.833	18.495	11.801	5.749	0.339	-4.432	-8.564	-12.059	-14.918	-17.144	-18.738	-19.702	-20.038	-19.748	-18.834	-17.299	-15.144	-12.371	-8.985	-4.985	-0.377	4.84	10.661	17.084	24.107	31.728	39.943	48.751	58.15
1,1,1-trifluoro-2-propanol	374-01-6		-90.915	-86.213	-80.983	-75.247	-69.033	-62.376	-55.322	-47.935	-40.302	-32.543	-24.823	-17.356	-10.415	-4.311	0.646	4.209	6.263	6.863	6.216	4.618	2.389	-0.183	-2.861	-5.866	-8.611	-10.905	-12.753	-14.163	-15.139	-15.692	-15.827	-15.555	-14.884	-13.822	-12.378	-10.56	-8.375	-5.831	-2.935	0.308	1.903	1.69	-1.014	-7.246	-17.665	-32.168	-49.973
1,1,1-trifluoromethylmethylether	421-14-7		213.414	198.085	183.254	168.926	155.103	141.791	128.994	116.716	104.964	93.743	83.056	72.91	63.308	54.253	45.748	37.795	30.394	23.544	17.245	11.493	6.283	1.612	-2.529	-6.184	-9.327	-11.956	-14.083	-15.721	-16.884	-17.583	-17.832	-17.642	-17.023	-15.984	-14.53	-12.665	-10.39	-7.704	-4.603	-1.079	2.765	7.005	11.675	16.787	22.355	28.393	34.916
1,1,2,2-tetrabromoethane	79-27-6		215.035	199.024	183.611	168.792	154.569	140.938	127.898	115.449	103.587	92.311	81.619	71.508	61.976	53.019	44.636	36.822	29.573	22.885	16.753	11.173	6.138	1.642	-2.323	-5.765	-8.694	-11.12	-13.054	-14.511	-15.504	-16.051	-16.168	-15.876	-15.196	-14.15	-12.761	-11.055	-9.053	-6.778	-4.252	-1.492	-0.286	0.059	-0.199	-1.066	-2.488	-4.364	-6.562
1,1,2,2-tetrachloro-1-fluoroethane	354-14-3		242.835	225.08	207.96	191.476	175.627	160.41	145.826	131.874	118.552	105.859	93.793	82.355	71.541	61.351	51.782	42.833	34.501	26.784	19.68	13.185	7.297	2.011	-2.677	-6.772	-10.279	-13.205	-15.556	-17.343	-18.574	-19.262	-19.419	-19.063	-18.21	-16.883	-15.106	-12.905	-10.311	-7.357	-4.079	-0.513	1.729	2.994	3.346	2.664	0.939	-1.725	-5.134
1,1,2,3,4,4-hexachloro-1,3-butadiene	87-68-3		250.692	232.854	215.632	199.024	183.032	167.653	152.888	138.735	125.195	112.266	99.948	88.24	77.142	66.652	56.769	47.494	38.824	30.76	23.299	16.442	10.187	4.533	-0.522	-4.977	-8.835	-12.096	-14.762	-16.834	-18.313	-19.2	-19.497	-19.205	-18.325	-16.859	-14.807	-12.172	-8.954	-5.154	-0.774	4.184	9.721	15.835	22.525	29.789	37.628	46.04	55.025
1,1,2,2-tetrafluoro-1-(trifluoromethoxy)ethane	2356-61-8		258.592	239.899	221.873	204.512	187.816	171.785	156.419	141.715	127.674	114.295	101.577	89.52	78.12	67.379	57.294	47.863	39.085	30.958	23.478	16.643	10.448	4.891	-0.035	-4.335	-8.018	-11.091	-13.567	-15.458	-16.779	-17.551	-17.794	-17.537	-16.809	-15.647	-14.092	-12.188	-9.982	-7.527	-4.869	-2.055	-0.991	-1.104	-2.156	-4.122	-6.877	-10.226	-13.943
1,1,2-trichloroethane	79-00-5		211.169	194.862	179.182	164.126	149.694	135.884	122.694	110.123	98.169	86.83	76.104	65.988	56.48	47.576	39.273	31.567	24.453	17.927	11.981	6.611	1.808	-2.438	-6.134	-9.294	-11.93	-14.057	-15.692	-16.852	-17.559	-17.834	-17.701	-17.186	-16.315	-15.113	-13.605	-11.815	-9.763	-7.463	-4.928	-2.161	-0.449	0.847	1.965	2.925	3.766	4.543	5.317
1,1,2-trimethylcyclohexane	7094-26-0		267.031	248.265	230.139	212.653	195.806	179.599	164.031	149.101	134.81	121.157	108.142	95.765	84.026	72.924	62.46	52.632	43.442	34.888	26.971	19.69	13.045	7.037	1.664	-3.072	-7.173	-10.637	-13.466	-15.66	-17.217	-18.14	-18.426	-18.077	-17.093	-15.472	-13.216	-10.325	-6.798	-2.634	2.165	7.6	13.671	20.378	27.722	35.702	44.319	53.573	63.464
1,1,2-trimethylcyclopentane	4259-00-1		266.925	248.159	230.034	212.548	195.703	179.497	163.93	149.002	134.713	121.062	108.05	95.676	83.939	72.84	62.379	52.555	43.368	34.817	26.904	19.627	12.987	6.984	1.617	-3.114	-7.208	-10.666	-13.488	-15.673	-17.222	-18.135	-18.411	-18.051	-17.054	-15.421	-13.15	-10.243	-6.699	-2.517	2.302	7.758	13.852	20.584	27.954	35.963	44.61	53.896	63.82
1,1,3,3-tetramethyl-1,3-diphenyldisiloxane	56-33-7		-161.485	-141.108	-120.487	-99.743	-79.048	-58.636	-38.84	-20.119	-3.093	11.482	22.837	30.445	34.278	34.841	32.95	29.44	24.994	20.108	15.11	10.217	5.563	1.236	-2.71	-6.305	-9.451	-12.117	-14.303	-16.008	-17.232	-17.972	-18.226	-17.991	-17.265	-16.042	-14.319	-12.092	-9.355	-6.105	-2.335	1.958	6.78	12.136	18.031	24.469	31.456	38.995	47.091
1,1,3,3-tetramethylcyclopentane	50876-33-0		266.829	248.063	229.939	212.455	195.612	179.41	163.847	148.924	134.641	120.996	107.99	95.623	83.894	72.802	62.348	52.531	43.351	34.807	26.9	19.629	12.994	6.995	1.632	-3.097	-7.19	-10.648	-13.471	-15.659	-17.212	-18.131	-18.416	-18.066	-17.081	-15.462	-13.208	-10.32	-6.797	-2.64	2.152	7.579	13.641	20.337	27.669	35.637	44.239	53.478	63.352
1,1-dibromoethane	557-91-5		208.8	192.961	177.736	163.125	149.126	135.734	122.949	110.766	99.182	88.194	77.797	67.987	58.758	50.106	42.024	34.505	27.542	21.128	15.254	9.911	5.088	0.777	-3.035	-6.359	-9.206	-11.59	-13.521	-15.012	-16.075	-16.722	-16.963	-16.807	-16.263	-15.338	-14.037	-12.363	-10.32	-7.906	-5.12	-1.958	1.042	4.134	7.4	10.825	14.397	18.111	21.966
1,1,3-trimethylcyclopentane	4516-69-2		268.096	249.265	231.076	213.529	196.623	180.358	164.734	149.751	135.408	121.706	108.643	96.221	84.439	73.296	62.793	52.929	43.704	35.118	27.172	19.864	13.195	7.166	1.774	-2.978	-7.092	-10.567	-13.404	-15.601	-17.16	-18.081	-18.362	-18.005	-17.009	-15.374	-13.1	-10.187	-6.634	-2.443	2.389	7.86	13.97	20.721	28.112	36.143	44.814	54.126	64.079
1,1,3-trimethylcyclohexane	3073-66-3		266.273	247.551	229.467	212.023	195.217	179.05	163.52	148.628	134.374	120.757	107.777	95.433	83.726	72.655	62.22	52.42	43.257	34.728	26.835	19.577	12.953	6.965	1.611	-3.109	-7.194	-10.645	-13.461	-15.644	-17.192	-18.106	-18.386	-18.031	-17.042	-15.42	-13.162	-10.271	-6.744	-2.584	2.212	7.643	13.708	20.409	27.745	35.717	44.324	53.567	63.447
1,1-dichloro-2,2-difluoroethylmethylether	76-38-0		215.212	198.709	182.841	167.606	153.004	139.032	125.689	112.971	100.876	89.402	78.545	68.303	58.671	49.644	41.22	33.391	26.153	19.499	13.422	7.914	2.966	-1.431	-5.287	-8.614	-11.424	-13.731	-15.548	-16.891	-17.776	-18.218	-18.234	-17.84	-17.053	-15.888	-14.358	-12.476	-10.253	-7.696	-4.811	-1.602	1.191	3.851	6.457	8.961	11.329	13.542	15.597
1,1-diethoxyethane	105-57-7		-276.929	-266.747	-255.993	-244.677	-232.808	-220.399	-207.463	-194.017	-180.081	-165.68	-150.848	-135.628	-120.081	-104.3	-88.422	-72.66	-57.338	-42.927	-30.05	-19.398	-11.528	-6.621	-4.383	-6.138	-8.699	-11.021	-13.058	-14.77	-16.114	-17.055	-17.558	-17.594	-17.138	-16.168	-14.665	-12.614	-10	-6.814	-3.045	1.315	6.271	11.83	17.996	24.774	32.166	40.176	48.806
1,1-dichlorocyclohexane	2108-92-1		211.048	195.39	180.328	165.86	151.981	138.688	125.976	113.839	102.274	91.275	80.836	70.951	61.616	52.823	44.568	36.843	29.643	22.962	16.796	11.137	5.983	1.328	-2.832	-6.498	-9.675	-12.362	-14.561	-16.271	-17.493	-18.223	-18.461	-18.202	-17.443	-16.18	-14.407	-12.122	-9.317	-5.987	-2.128	2.267	7.203	12.686	18.72	25.311	32.464	40.184	48.474
1,1-dimethoxy-2-methyl-propane	41632-89-7		-260.238	-250.368	-239.921	-228.908	-217.341	-205.235	-192.608	-179.481	-165.881	-151.839	-137.398	-122.614	-107.565	-92.367	-77.188	-62.287	-48.036	-34.948	-23.641	-14.712	-8.528	-5.054	-3.865	-5.965	-8.656	-11.06	-13.142	-14.867	-16.201	-17.114	-17.58	-17.574	-17.076	-16.068	-14.533	-12.458	-9.831	-6.643	-2.885	1.451	6.37	11.878	17.981	24.681	31.983	39.89	48.405
1,1-dimethylcyclohexane	590-66-9		267.228	248.445	230.302	212.8	195.938	179.717	164.135	149.193	134.89	121.227	108.202	95.816	84.069	72.96	62.488	52.655	43.459	34.901	26.979	19.695	13.048	7.038	1.665	-3.072	-7.173	-10.637	-13.464	-15.656	-17.211	-18.13	-18.413	-18.059	-17.07	-15.444	-13.182	-10.283	-6.749	-2.577	2.23	7.675	13.756	20.474	27.829	35.821	44.451	53.718	63.623
1,1-dimethylcyclopentane	1638-26-2		266.548	247.796	229.684	212.212	195.381	179.19	163.638	148.725	134.452	120.816	107.819	95.461	83.739	72.656	62.209	52.399	43.227	34.69	26.791	19.527	12.9	6.908	1.553	-3.167	-7.251	-10.7	-13.513	-15.69	-17.232	-18.138	-18.408	-18.043	-17.042	-15.405	-13.132	-10.223	-6.677	-2.495	2.323	7.779	13.871	20.601	27.968	35.973	44.616	53.897	63.817
1,1-diphenylethane	612-00-0		192.859	178.187	164.099	150.592	137.661	125.301	113.508	102.276	91.598	81.47	71.883	62.831	54.306	46.301	38.806	31.814	25.316	19.303	13.767	8.699	4.092	-0.062	-3.77	-7.038	-9.869	-12.27	-14.24	-15.783	-16.897	-17.581	-17.833	-17.648	-17.021	-15.947	-14.419	-12.429	-9.971	-7.034	-3.612	0.303	4.721	9.649	15.094	21.065	27.568	34.61	42.198
1,10-undecadiyne	4117-15-1		171.717	158.365	145.577	133.348	121.672	110.543	99.952	89.891	80.353	71.327	62.803	54.77	47.218	40.135	33.51	27.33	21.585	16.263	11.355	6.851	2.743	-0.975	-4.308	-7.344	-10.009	-12.269	-14.125	-15.576	-16.62	-17.253	-17.473	-17.273	-16.649	-15.596	-14.11	-12.184	-9.815	-7	-3.735	-0.019	3.6	7.329	11.212	15.191	19.208	23.208	27.143
1,2,3,4,5,5-hexachloro-1,3-cyclopentadiene	77-47-4		244.074	226.647	209.824	193.606	177.991	162.979	148.568	134.758	121.548	108.937	96.924	85.509	74.689	64.465	54.834	45.797	37.351	29.496	22.23	15.552	9.461	3.956	-0.965	-5.303	-9.059	-12.235	-14.831	-16.85	-18.293	-19.16	-19.454	-19.175	-18.324	-16.903	-14.913	-12.354	-9.228	-5.536	-1.278	3.545	8.933	14.884	21.398	28.475	36.116	44.319	53.085
1,2,2-trichloropentafluoropropane	1599-41-3		268.768	249.704	231.297	213.546	196.452	180.014	164.231	149.103	134.629	120.809	107.642	95.128	83.265	72.052	61.49	51.576	42.311	33.693	25.721	18.394	11.71	5.669	0.27	-4.491	-8.613	-12.098	-14.949	-17.167	-18.753	-19.71	-20.039	-19.744	-18.825	-17.285	-15.127	-12.352	-8.964	-4.965	-0.357	4.858	10.676	17.095	24.113	31.727	39.936	48.736	58.125
1,2,3,4-tetrafluorobenzene	551-62-2		231.698	214.57	198.077	182.216	166.985	152.382	138.406	125.054	112.324	100.212	88.715	77.832	67.558	57.889	48.823	40.354	32.479	25.193	18.49	12.365	6.812	1.826	-2.602	-6.477	-9.807	-12.6	-14.864	-16.609	-17.843	-18.576	-18.816	-18.575	-17.861	-16.685	-15.055	-12.981	-10.471	-7.533	-4.172	-0.394	3.361	7.3	11.489	15.915	20.569	25.451	30.562
1,2,3,4-tetrahydro-2-methylnaphthalene	3877-19-8		200.678	185.987	171.858	158.285	145.261	132.781	120.838	109.423	98.531	88.154	78.285	68.917	60.044	51.66	43.758	36.335	29.386	22.907	16.896	11.352	6.274	1.664	-2.479	-6.151	-9.349	-12.069	-14.307	-16.057	-17.314	-18.071	-18.323	-18.063	-17.286	-15.985	-14.154	-11.787	-8.879	-5.424	-1.418	3.144	8.267	13.955	20.212	27.041	34.445	42.428	50.991
1,2,3,4-tetrahydro-5-methylnaphthalene	2809-64-5		196.506	182.092	168.236	154.933	142.174	129.954	118.263	107.094	96.439	86.29	76.639	67.478	58.799	50.596	42.862	35.591	28.779	22.423	16.519	11.068	6.068	1.52	-2.572	-6.205	-9.375	-12.077	-14.305	-16.051	-17.31	-18.073	-18.334	-18.084	-17.317	-16.026	-14.203	-11.842	-8.937	-5.481	-1.469	3.104	8.243	13.953	20.237	27.099	34.543	42.572	51.188
1,2,3,4-tetrahydro-6-methylnaphthalene	1680-51-9		200.174	185.581	171.547	158.064	145.125	132.724	120.852	109.503	98.668	88.341	78.514	69.18	60.332	51.964	44.072	36.649	29.692	23.199	17.168	11.599	6.491	1.848	-2.33	-6.037	-9.27	-12.023	-14.29	-16.066	-17.343	-18.115	-18.375	-18.116	-17.331	-16.013	-14.157	-11.755	-8.803	-5.294	-1.224	3.412	8.619	14.4	20.761	27.703	35.23	43.346	52.052
1,2,3,5-tetramethylbenzene	527-53-7		197.867	183.394	169.479	156.116	143.297	131.016	119.265	108.035	97.319	87.11	77.399	68.178	59.441	51.181	43.392	36.067	29.204	22.798	16.848	11.351	6.309	1.722	-2.407	-6.08	-9.287	-12.022	-14.279	-16.052	-17.334	-18.119	-18.397	-18.164	-17.41	-16.13	-14.315	-11.96	-9.059	-5.604	-1.591	2.987	8.133	13.853	20.152	27.032	34.498	42.553	51.201
1,2,3,4-tetramethylbenzene	488-23-3		195.549	181.191	167.392	154.146	141.446	129.283	117.651	106.54	95.943	85.851	76.255	67.148	58.521	50.368	42.681	35.454	28.683	22.363	16.492	11.068	6.09	1.561	-2.519	-6.149	-9.321	-12.029	-14.267	-16.028	-17.305	-18.091	-18.377	-18.157	-17.421	-16.164	-14.377	-12.053	-9.186	-5.769	-1.796	2.738	7.84	13.513	19.762	26.591	34.005	42.007	50.6
1,2,3,5-tetrafluorobenzene	2367-82-0		231.522	214.427	197.966	182.135	166.933	152.357	138.405	125.076	112.365	100.271	88.789	77.918	67.654	57.993	48.931	40.464	32.588	25.299	18.591	12.459	6.898	1.902	-2.535	-6.42	-9.76	-12.562	-14.834	-16.585	-17.823	-18.558	-18.8	-18.558	-17.844	-16.667	-15.04	-12.973	-10.476	-7.56	-4.234	-0.506	2.884	6.254	9.698	13.187	16.7	20.233	23.792
1,2,3,5-tetraethylbenzene	38842-05-6		206.744	192.167	178.115	164.582	151.56	139.04	127.015	115.478	104.423	93.843	83.733	74.09	64.91	56.191	47.932	40.135	32.799	25.928	19.526	13.598	8.148	3.184	-1.289	-5.268	-8.74	-11.699	-14.135	-16.042	-17.413	-18.241	-18.52	-18.244	-17.407	-16.004	-14.029	-11.478	-8.346	-4.63	-0.326	4.57	10.061	16.149	22.838	30.129	38.025	46.527	55.638
1,2,3-trichloropropane	96-18-4		200.53	184.738	169.57	155.026	141.103	127.799	115.114	103.044	91.587	80.741	70.503	60.869	51.836	43.4	35.555	28.296	21.617	15.512	9.972	4.988	0.55	-3.353	-6.735	-9.61	-11.995	-13.906	-15.364	-16.388	-17.001	-17.225	-17.083	-16.596	-15.786	-14.67	-13.263	-11.577	-9.619	-7.391	-4.888	-2.103	0.209	2.491	4.907	7.481	10.241	13.218	16.446
1,2,3-trichloro-1,1,2,3,3-pentafluoropropane	76-17-5		270.259	251.117	232.633	214.807	197.637	181.125	165.269	150.069	135.525	121.636	108.401	95.82	83.892	72.617	61.994	52.022	42.701	34.029	26.007	18.632	11.903	5.821	0.383	-4.411	-8.564	-12.075	-14.947	-17.181	-18.779	-19.741	-20.071	-19.77	-18.839	-17.282	-15.098	-12.292	-8.864	-4.817	-0.154	5.123	11.013	17.512	24.618	32.329	40.643	49.558	59.071
1,2,3-trimethylbenzene	526-73-8		195.145	180.656	166.738	153.384	140.59	128.347	116.648	105.485	94.852	84.738	75.137	66.039	57.437	49.322	41.687	34.524	27.827	21.589	15.807	10.475	5.593	1.157	-2.832	-6.373	-9.463	-12.1	-14.278	-15.993	-17.238	-18.007	-18.293	-18.087	-17.383	-16.172	-14.447	-12.201	-9.426	-6.115	-2.262	2.141	7.098	12.616	18.699	25.353	32.582	40.39	48.781
1,2,3-trimethylcyclohexane,(1a,2b,3a)	1678-81-5		268.452	249.6	231.39	213.822	196.896	180.611	164.968	149.966	135.605	121.886	108.807	96.368	84.57	73.413	62.896	53.018	43.781	35.184	27.226	19.908	13.23	7.191	1.792	-2.968	-7.089	-10.571	-13.413	-15.616	-17.18	-18.105	-18.391	-18.037	-17.045	-15.413	-13.142	-10.232	-6.683	-2.495	2.333	7.801	13.908	20.654	28.04	36.066	44.732	54.037	63.983
1,2,4-benzenetricarboxylicacidtrimethylester	2459-10-01		-76.557	-75.902	-74.741	-73.083	-70.938	-68.318	-65.236	-61.713	-57.771	-53.44	-48.763	-43.791	-38.595	-33.266	-27.922	-22.706	-17.786	-13.348	-9.571	-6.607	-4.55	-3.416	-3.137	-4.863	-7.02	-8.995	-10.769	-12.319	-13.619	-14.642	-15.362	-15.75	-15.783	-15.436	-14.688	-13.519	-11.91	-9.846	-7.312	-4.295	-0.858	3.053	7.461	12.372	17.793	23.728	30.181
1,2,4-trimethylbenzene	95-63-6		198.341	183.699	169.627	156.119	143.167	130.766	118.909	107.588	96.796	86.525	76.768	67.517	58.764	50.502	42.725	35.426	28.598	22.238	16.342	10.905	5.927	1.406	-2.658	-6.263	-9.406	-12.085	-14.296	-16.032	-17.29	-18.062	-18.341	-18.122	-17.397	-16.16	-14.402	-12.118	-9.3	-5.942	-2.039	2.416	7.429	13.004	19.147	25.861	33.152	41.024	49.479
1,2,4-trifluorobenzene	367-23-7		221.806	205.201	189.22	173.861	159.121	144.999	131.492	118.598	106.314	94.637	83.564	73.092	63.216	53.934	45.242	37.134	29.606	22.653	16.271	10.451	5.189	0.478	-3.691	-7.325	-10.433	-13.024	-15.107	-16.695	-17.796	-18.423	-18.587	-18.3	-17.573	-16.419	-14.846	-12.867	-10.488	-7.717	-4.559	-1.018	2.326	5.766	9.398	13.217	17.221	21.417	25.816
1,2-benzenedicarboxylicaciddiisononylester	28553-12-0		-97.397	-94.201	-90.509	-86.333	-81.687	-76.587	-71.053	-65.112	-58.799	-52.163	-45.274	-38.225	-31.151	-24.227	-17.68	-11.782	-6.817	-3.039	-0.606	0.464	0.302	-0.847	-2.69	-5.673	-8.666	-11.275	-13.473	-15.239	-16.55	-17.389	-17.74	-17.59	-16.928	-15.744	-14.031	-11.783	-8.994	-5.661	-1.78	2.651	7.614	13.122	19.178	25.782	32.934	40.633	48.878
1,2-butanediol	584-03-2		-278.01	-266.115	-253.718	-240.832	-227.471	-213.652	-199.397	-184.73	-169.681	-154.288	-138.597	-122.673	-106.603	-90.514	-74.589	-59.104	-44.447	-31.139	-19.78	-10.916	-4.834	-1.43	-0.245	-2.241	-4.831	-7.17	-9.225	-10.966	-12.36	-13.38	-14.001	-14.199	-13.954	-13.251	-12.075	-10.415	-8.262	-5.609	-2.452	1.214	4.513	7.528	10.069	11.668	11.742	9.669	4.951
1,2-cycloheptanedione	3008-39-7		-135.035	-131.238	-126.951	-122.184	-116.952	-111.271	-105.16	-98.64	-91.739	-84.49	-76.934	-69.123	-61.124	-53.023	-44.931	-36.993	-29.384	-22.318	-16.026	-10.74	-6.643	-3.837	-2.307	-3.49	-5.41	-7.306	-9.146	-10.885	-12.474	-13.859	-14.988	-15.811	-16.283	-16.361	-16.012	-15.203	-13.911	-12.113	-9.793	-6.934	-3.553	0.377	4.869	9.927	15.557	21.762	28.546
1,2-dibromopropane	78-75-1		202.398	186.958	172.126	157.9	144.277	131.253	118.826	106.992	95.746	85.084	75.001	65.492	56.55	48.17	40.344	33.064	26.323	20.111	14.419	9.237	4.555	0.361	-3.355	-6.605	-9.4	-11.752	-13.671	-15.168	-16.252	-16.931	-17.212	-17.1	-16.599	-15.71	-14.434	-12.768	-10.709	-8.252	-5.389	-2.114	1.265	4.937	8.972	13.377	18.161	23.333	28.903
1,2-dibutoxyethane	112-48-1		-495.546	-466.18	-436.492	-406.58	-376.572	-346.621	-316.906	-287.625	-258.976	-231.135	-204.232	-178.334	-153.451	-129.563	-106.672	-84.872	-64.432	-45.875	-29.986	-17.623	-9.314	-4.892	-3.548	-5.842	-8.721	-11.277	-13.466	-15.25	-16.597	-17.477	-17.864	-17.737	-17.078	-15.872	-14.107	-11.771	-8.857	-5.356	-1.262	3.43	8.724	14.624	21.134	28.256	35.992	44.345	53.316
1,2-dichloro-1-fluoroethane	430-57-9		206.722	190.418	174.753	159.727	145.338	131.584	118.465	105.977	94.12	82.891	72.287	62.306	52.945	44.2	36.067	28.541	21.618	15.292	9.556	4.401	-0.18	-4.199	-7.667	-10.598	-13.008	-14.914	-16.336	-17.296	-17.82	-17.933	-17.665	-17.045	-16.102	-14.867	-13.365	-11.621	-9.653	-7.474	-5.089	-2.498	-0.994	0.106	1.069	1.933	2.755	3.597	4.527
1,2-dichloro-2-fluoropropane	420-97-3		207.216	191.128	175.672	160.845	146.646	133.072	120.121	107.79	96.077	84.977	74.488	64.606	55.325	46.641	38.549	31.041	24.112	17.754	11.958	6.714	2.014	-2.154	-5.802	-8.943	-11.59	-13.758	-15.462	-16.716	-17.538	-17.941	-17.94	-17.549	-16.78	-15.644	-14.147	-12.297	-10.095	-7.542	-4.635	-1.368	1.721	4.921	8.33	11.952	15.793	19.861	24.17
1,2-diethylbenzene	135-01-3		201.626	186.869	172.678	159.047	145.97	133.438	121.447	109.988	99.053	88.637	78.731	69.329	60.424	52.009	44.079	36.628	29.653	23.149	17.114	11.546	6.445	1.812	-2.354	-6.049	-9.269	-12.012	-14.273	-16.046	-17.325	-18.106	-18.381	-18.145	-17.391	-16.114	-14.306	-11.962	-9.077	-5.645	-1.661	2.88	7.982	13.649	19.887	26.697	34.084	42.051	50.6
1,2-dichloropropane	78-87-5		196.686	181.28	166.494	152.327	138.777	125.84	113.513	101.792	90.674	80.154	70.226	60.886	52.128	43.944	36.327	29.269	22.76	16.792	11.354	6.433	2.019	-1.903	-5.346	-8.323	-10.849	-12.939	-14.605	-15.862	-16.722	-17.195	-17.29	-17.015	-16.375	-15.371	-14.003	-12.269	-10.163	-7.678	-4.804	-1.532	1.878	5.594	9.68	14.148	19.009	24.274	29.958
1,2-dichloro-3,3,4,4,5,5-hexafluorocyclopentene	706-79-6		257.423	239.034	221.289	204.187	187.726	171.906	156.726	142.185	128.281	115.013	102.379	90.38	79.012	68.275	58.166	48.685	39.828	31.595	23.984	16.992	10.616	4.856	-0.293	-4.831	-8.763	-12.09	-14.815	-16.942	-18.472	-19.41	-19.758	-19.519	-18.696	-17.292	-15.311	-12.755	-9.627	-5.929	-1.665	3.163	8.554	14.505	21.015	28.082	35.705	43.884	52.618
1,2-diisopropylbenzene	577-55-9		207.179	192.224	177.825	163.977	150.674	137.908	125.674	113.964	102.774	92.096	81.925	72.256	63.083	54.402	46.21	38.504	31.281	24.54	18.282	12.505	7.211	2.403	-1.918	-5.748	-9.082	-11.918	-14.249	-16.072	-17.38	-18.169	-18.434	-18.169	-17.368	-16.027	-14.142	-11.706	-8.717	-5.168	-1.058	3.619	8.865	14.685	21.08	28.055	35.61	43.75	52.476
1,2-dihydronaphthalene	447-53-0		196.112	181.285	167.044	153.385	140.304	127.796	115.856	104.478	93.657	83.386	73.658	64.467	55.804	47.662	40.033	32.909	26.282	20.142	14.483	9.297	4.576	0.314	-3.495	-6.859	-9.778	-12.255	-14.289	-15.882	-17.032	-17.737	-17.993	-17.795	-17.139	-16.017	-14.424	-12.351	-9.791	-6.735	-3.178	0.891	5.478	10.59	16.235	22.42	29.151	36.433	44.274
1,2-dimethylhydrazine	540-73-8		-661.611	-632.068	-601.945	-571.253	-540.003	-508.213	-475.901	-443.092	-409.818	-376.117	-342.04	-307.65	-273.029	-238.281	-203.551	-169.043	-135.077	-102.2	-71.381	-44.241	-22.903	-8.914	-1.901	-2.555	-4.786	-6.971	-9.043	-10.94	-12.603	-13.978	-15.02	-15.691	-15.957	-15.793	-15.179	-14.097	-12.535	-10.483	-7.933	-4.882	-1.684	1.843	5.753	10.034	14.67	19.648	24.957
1,2-dimethyl-cyclopentene	765-47-9		211.513	198.11	185.014	172.22	159.727	147.538	135.657	124.096	112.867	101.986	91.469	81.335	71.601	62.286	53.409	44.985	37.032	29.564	22.596	16.14	10.207	4.809	-0.047	-4.386	-8.167	-11.37	-13.991	-16.028	-17.477	-18.335	-18.6	-18.268	-17.338	-15.807	-13.673	-10.934	-7.588	-3.633	0.932	6.109	11.9	18.304	25.325	32.963	41.218	50.093	59.587
1,2-dimethylcyclohexene	1674-10-8		215.875	201.713	187.946	174.568	161.575	148.964	136.737	124.897	113.449	102.399	91.756	81.532	71.736	62.382	53.48	45.045	37.088	29.621	22.657	16.206	10.278	4.884	0.032	-4.308	-8.09	-11.295	-13.92	-15.959	-17.411	-18.271	-18.536	-18.204	-17.273	-15.738	-13.599	-10.853	-7.498	-3.533	1.046	6.238	12.045	18.47	25.512	33.174	41.455	50.358	59.882
1,2-dimethylnaphthalene	573-98-8		201.746	186.557	171.962	157.957	144.538	131.701	119.441	107.754	96.633	86.074	76.07	66.614	57.7	49.321	41.469	34.137	27.316	21.001	15.181	9.852	5.004	0.632	-3.271	-6.709	-9.689	-12.212	-14.282	-15.9	-17.067	-17.782	-18.043	-17.846	-17.19	-16.067	-14.474	-12.405	-9.852	-6.809	-3.269	0.775	5.33	10.403	16.001	22.131	28.799	36.01	43.772
1,2-epoxy-3-ethoxypropane	4016-11-09		-220.841	-212.854	-204.33	-195.285	-185.733	-175.693	-165.188	-154.242	-142.886	-131.158	-119.105	-106.786	-94.277	-81.683	-69.144	-56.853	-45.066	-34.114	-24.385	-16.271	-10.079	-5.928	-3.705	-5.014	-7.17	-9.207	-11.09	-12.777	-14.225	-15.389	-16.227	-16.7	-16.772	-16.413	-15.593	-14.29	-12.483	-10.155	-7.292	-3.881	0.084	4.615	9.718	15.4	21.667	28.522	35.969
1,2-ethanedithiol	540-63-6		57.991	52.797	47.988	43.547	39.456	35.692	32.229	29.038	26.089	23.348	20.782	18.356	16.041	13.806	11.629	9.492	7.383	5.299	3.242	1.219	-0.756	-2.667	-4.497	-6.678	-8.743	-10.504	-11.975	-13.163	-14.076	-14.716	-15.082	-15.169	-14.969	-14.471	-13.659	-12.52	-11.035	-9.185	-6.953	-4.32	-1.767	0.982	4.022	7.353	10.972	14.879	19.071
1,2-propanediamine	78-90-0		-812.57	-775.748	-738.325	-700.309	-661.713	-622.549	-582.838	-542.601	-501.869	-460.68	-419.085	-377.149	-334.96	-292.634	-250.329	-208.272	-166.805	-126.508	-88.441	-54.539	-27.668	-10.203	-1.713	-2.204	-4.463	-6.681	-8.78	-10.692	-12.356	-13.72	-14.741	-15.383	-15.618	-15.422	-14.776	-13.667	-12.083	-10.016	-7.457	-4.402	-1.188	2.37	6.327	10.676	15.41	20.521	26.003
1,2-propanediolmonoethylether	52125-53-8		-234.073	-224.925	-215.221	-204.97	-194.187	-182.888	-171.09	-158.818	-146.1	-132.971	-119.481	-105.695	-91.706	-77.649	-63.722	-50.21	-37.512	-26.129	-16.611	-9.411	-4.72	-2.374	-1.926	-4.259	-7.043	-9.512	-11.633	-13.375	-14.713	-15.618	-16.071	-16.05	-15.538	-14.522	-12.99	-10.932	-8.34	-5.209	-1.536	2.683	6.938	11.2	15.244	18.599	20.595	20.408	17.253
1,2-propyleneglycoldiacetate	623-84-7		-157.582	-153.167	-148.233	-142.788	-136.846	-130.416	-123.513	-116.153	-108.357	-100.149	-91.561	-82.638	-73.437	-64.042	-54.565	-45.165	-36.05	-27.486	-19.786	-13.269	-8.203	-4.73	-2.822	-4.078	-6.141	-8.126	-9.996	-11.71	-13.223	-14.488	-15.461	-16.102	-16.372	-16.236	-15.667	-14.636	-13.124	-11.11	-8.578	-5.516	-1.932	2.196	6.881	12.131	17.951	24.346	31.321
1,3,5,7-cyclooctatetraene	629-20-9		110.46	103.739	97.326	91.173	85.231	79.451	73.789	68.204	62.668	57.162	51.678	46.222	40.811	35.469	30.228	25.123	20.188	15.459	10.966	6.739	2.802	-0.826	-4.125	-7.209	-9.936	-12.252	-14.158	-15.655	-16.744	-17.421	-17.684	-17.527	-16.943	-15.926	-14.468	-12.558	-10.189	-7.349	-4.03	-0.222	4.086	8.903	14.237	20.098	26.494	33.432	40.92
1,3,5-cyclooctatriene	1871-52-9		181.009	167.781	155.04	142.783	131.006	119.706	108.878	98.519	88.625	79.191	70.214	61.688	53.611	45.977	38.782	32.023	25.696	19.798	14.325	9.277	4.651	0.448	-3.333	-6.731	-9.704	-12.234	-14.318	-15.952	-17.134	-17.857	-18.115	-17.901	-17.209	-16.031	-14.358	-12.182	-9.497	-6.292	-2.562	1.702	6.507	11.859	17.766	24.232	31.265	38.869	47.048
1,3,5-trifluorobenzene	372-38-3		225.331	208.606	192.502	177.016	162.147	147.892	134.249	121.217	108.791	96.97	85.751	75.131	65.107	55.675	46.833	38.575	30.899	23.8	17.273	11.314	5.916	1.075	-3.217	-6.966	-10.18	-12.866	-15.033	-16.692	-17.85	-18.52	-18.711	-18.436	-17.705	-16.531	-14.925	-12.897	-10.458	-7.617	-4.381	-0.757	2.527	5.824	9.249	12.792	16.452	20.238	24.169
1,3,5-triisopropylbenzene	717-74-8		218.284	202.884	188.024	173.699	159.903	146.632	133.881	121.646	109.923	98.709	88.002	77.799	68.1	58.903	50.209	42.019	34.333	27.154	20.484	14.326	8.684	3.56	-1.04	-5.113	-8.654	-11.66	-14.125	-16.045	-17.417	-18.235	-18.495	-18.195	-17.33	-15.896	-13.89	-11.31	-8.152	-4.413	-0.091	4.817	10.312	16.397	23.074	30.345	38.211	46.673	55.734
1,3,5-triethylbenzene	102-25-0		207.424	192.561	178.247	164.475	151.238	138.529	126.342	114.669	103.504	92.841	82.674	72.997	63.807	55.1	46.872	39.122	31.849	25.053	18.734	12.895	7.538	2.667	-1.714	-5.6	-8.986	-11.865	-14.232	-16.082	-17.406	-18.2	-18.458	-18.172	-17.339	-15.951	-14.004	-11.493	-8.413	-4.76	-0.53	4.281	9.677	15.66	22.234	29.401	37.165	45.526	54.489
1,3,5-trimethyladamantane	707-35-7		264.13	245.564	227.631	210.331	193.663	177.628	162.224	147.453	133.312	119.803	106.925	94.678	83.062	72.076	61.721	51.996	42.902	34.437	26.603	19.399	12.825	6.881	1.567	-3.116	-7.17	-10.593	-13.386	-15.548	-17.08	-17.981	-18.252	-17.891	-16.899	-15.276	-13.021	-10.134	-6.615	-2.464	2.32	7.736	13.786	20.469	27.785	35.736	44.32	53.54	63.394
1,3-butanediol	107-88-0		-349.751	-334.234	-318.208	-301.688	-284.692	-267.241	-249.36	-231.076	-212.427	-193.453	-174.208	-154.759	-135.197	-115.645	-96.285	-77.381	-59.328	-42.681	-28.14	-16.425	-8.021	-2.932	-0.67	-2.298	-4.73	-6.983	-9.013	-10.779	-12.242	-13.361	-14.104	-14.44	-14.342	-13.787	-12.755	-11.232	-9.204	-6.66	-3.592	0.005	3.685	7.465	11.198	14.541	16.983	17.84	16.333
1,3-bis(1-methylethyl)-benzene	99-62-7		210.614	195.469	180.879	166.84	153.344	140.387	127.962	116.065	104.689	93.83	83.483	73.644	64.308	55.472	47.133	39.289	31.939	25.082	18.718	12.847	7.471	2.591	-1.79	-5.669	-9.042	-11.907	-14.258	-16.092	-17.405	-18.191	-18.446	-18.166	-17.347	-15.983	-14.072	-11.608	-8.589	-5.01	-0.868	3.84	9.116	14.965	21.388	28.388	35.967	44.129	52.874
1,3-cyclohexadiene	592-57-4		189.177	175.232	161.819	148.936	136.577	124.737	113.41	102.59	92.272	82.449	73.115	64.262	55.884	47.974	40.526	33.534	26.992	20.895	15.241	10.024	5.245	0.901	-3.006	-6.512	-9.579	-12.189	-14.341	-16.029	-17.248	-17.991	-18.253	-18.025	-17.301	-16.071	-14.329	-12.066	-9.275	-5.948	-2.078	2.342	7.318	12.856	18.962	25.641	32.898	40.738	49.164
1,3-cycloheptadiene	4054-38-0		187.223	173.417	160.153	147.423	135.222	123.541	112.373	101.709	91.543	81.864	72.665	63.937	55.672	47.861	40.498	33.576	27.09	21.034	15.405	10.202	5.425	1.074	-2.848	-6.386	-9.49	-12.136	-14.317	-16.029	-17.263	-18.013	-18.271	-18.028	-17.275	-16.005	-14.21	-11.881	-9.01	-5.591	-1.616	2.921	8.026	13.705	19.963	26.806	34.236	42.259	50.879
1,3-cyclohexanedimethanamine	2579-20-6		-789.255	-753.804	-717.773	-681.173	-644.018	-606.322	-568.105	-529.39	-490.205	-450.586	-410.575	-370.226	-329.608	-288.806	-247.936	-207.16	-166.741	-127.16	-89.403	-55.447	-28.474	-11.287	-3.449	-4.238	-6.586	-8.822	-10.865	-12.646	-14.108	-15.203	-15.892	-16.146	-15.943	-15.264	-14.096	-12.431	-10.262	-7.584	-4.394	-0.691	3.269	7.616	12.386	17.567	23.148	29.117	35.463
1,3-dibromopropane	109-64-8		192.291	177.226	162.774	148.934	135.703	123.078	111.055	99.631	88.803	78.564	68.911	59.837	51.336	43.4	36.022	29.192	22.9	17.134	11.884	7.135	2.873	-0.917	-4.251	-7.146	-9.619	-11.686	-13.364	-14.667	-15.609	-16.201	-16.451	-16.366	-15.947	-15.193	-14.1	-12.66	-10.862	-8.694	-6.141	-3.188	0.062	3.698	7.761	12.268	17.233	22.671	28.596
1,3-dibromobenzene	108-36-1		223.322	206.972	191.221	176.068	161.51	147.547	134.177	121.398	109.208	97.606	86.588	76.152	66.296	57.016	48.31	40.173	32.602	25.592	19.138	13.236	7.88	3.063	-1.22	-4.976	-8.213	-10.939	-13.161	-14.888	-16.128	-16.891	-17.183	-17.015	-16.395	-15.329	-13.824	-11.888	-9.525	-6.74	-3.534	0.091	3.859	7.924	12.336	17.095	22.203	27.664	33.482
1,3-dichloro-2-butene	926-57-8		195.864	180.614	165.973	151.939	138.508	125.679	113.448	101.811	90.764	80.303	70.424	61.121	52.388	44.22	36.609	29.547	23.027	17.04	11.576	6.624	2.173	-1.787	-5.27	-8.289	-10.856	-12.984	-14.686	-15.974	-16.859	-17.352	-17.462	-17.194	-16.554	-15.545	-14.167	-12.417	-10.291	-7.783	-4.885	-1.587	1.828	5.532	9.586	13.998	18.774	23.923	29.454
1,3-dichloro-2-propanol	96-23-1		-130.399	-124.609	-118.261	-111.368	-103.948	-96.022	-87.622	-78.795	-69.603	-60.141	-50.545	-41.003	-31.774	-23.183	-15.6	-9.386	-4.797	-1.914	-0.609	-0.597	-1.519	-3.029	-4.837	-7.195	-9.397	-11.221	-12.678	-13.781	-14.543	-14.975	-15.089	-14.891	-14.389	-13.585	-12.481	-11.073	-9.355	-7.319	-4.952	-2.24	-0.336	1.002	1.616	1.011	-1.421	-6.289	-14.005
1,3-dichloro-trans-2-butene	10075-38-4		195.979	180.856	166.337	152.419	139.097	126.369	114.231	102.677	91.704	81.306	71.477	62.212	53.505	45.347	37.733	30.653	24.1	18.064	12.537	7.508	2.967	-1.096	-4.692	-7.83	-10.52	-12.774	-14.598	-16.002	-16.993	-17.575	-17.754	-17.531	-16.908	-15.884	-14.456	-12.62	-10.371	-7.701	-4.603	-1.067	2.785	7.038	11.725	16.856	22.438	28.48	34.991
1,3-dichloropropane	142-28-9		191.073	175.835	161.224	147.24	133.879	121.138	109.014	97.505	86.605	76.312	66.618	57.52	49.01	41.081	33.726	26.934	20.696	15	9.833	5.182	1.031	-2.636	-5.836	-8.588	-10.911	-12.822	-14.34	-15.482	-16.263	-16.696	-16.79	-16.552	-15.985	-15.087	-13.853	-12.273	-10.337	-8.029	-5.333	-2.231	1.216	5.078	9.386	14.158	19.412	25.163	31.425
1,3-diethylbenzene	141-93-5		204.641	189.711	175.348	161.545	148.297	135.596	123.437	111.813	100.717	90.142	80.082	70.531	61.482	52.93	44.87	37.298	30.209	23.601	17.471	11.819	6.644	1.946	-2.274	-6.012	-9.266	-12.033	-14.308	-16.087	-17.365	-18.135	-18.394	-18.135	-17.352	-16.04	-14.193	-11.807	-8.875	-5.393	-1.357	3.239	8.398	14.125	20.423	27.295	34.745	42.776	51.391
1,3-diethenylbenzene	108-57-6		203.05	187.61	172.774	158.539	144.902	131.86	119.41	107.548	96.269	85.569	75.443	65.886	56.892	48.454	40.566	33.219	26.407	20.122	14.354	9.094	4.334	0.063	-3.727	-7.045	-9.901	-12.303	-14.259	-15.776	-16.859	-17.513	-17.741	-17.544	-16.924	-15.879	-14.406	-12.501	-10.158	-7.371	-4.133	-0.436	3.716	8.34	13.448	19.048	25.15	31.763	38.894
1,3-diethyl-5-methylbenzene	2050-24-0		206.437	191.548	177.214	163.429	150.186	137.479	125.301	113.645	102.505	91.873	81.745	72.115	62.976	54.325	46.159	38.473	31.266	24.538	18.286	12.514	7.221	2.41	-1.915	-5.75	-9.091	-11.933	-14.271	-16.098	-17.409	-18.198	-18.459	-18.185	-17.372	-16.014	-14.105	-11.639	-8.613	-5.021	-0.859	3.876	9.19	15.085	21.564	28.631	36.289	44.539	53.386
1,3-diiodopropane	627-31-6		192.405	177.674	163.532	149.976	137.004	124.612	112.798	101.557	90.885	80.779	71.232	62.239	53.795	45.892	38.522	31.677	25.349	19.528	14.202	9.361	4.992	1.084	-2.376	-5.403	-8.008	-10.204	-12.004	-13.419	-14.458	-15.13	-15.441	-15.395	-14.993	-14.236	-13.121	-11.641	-9.791	-7.561	-4.941	-1.92	1.4	5.1	9.215	13.756	18.737	24.168	30.06
1,3-dimethyladamantane	702-79-4		266.405	247.696	229.625	212.189	195.39	179.228	163.701	148.811	134.557	120.938	107.955	95.607	83.895	72.818	62.377	52.571	43.4	34.864	26.964	19.699	13.069	7.075	1.716	-3.008	-7.096	-10.548	-13.364	-15.545	-17.09	-17.998	-18.271	-17.907	-16.906	-15.268	-12.994	-10.082	-6.533	-2.347	2.478	7.94	14.041	20.78	28.158	36.175	44.831	54.126	64.061
1,3-dioxane	505-22-6		-229.607	-222.558	-214.911	-206.675	-197.858	-188.471	-178.526	-168.039	-157.027	-145.514	-133.53	-121.113	-108.317	-95.219	-81.926	-68.597	-55.462	-42.843	-31.167	-20.941	-12.663	-6.682	-3.059	-3.938	-5.976	-7.971	-9.883	-11.668	-13.273	-14.647	-15.737	-16.495	-16.877	-16.843	-16.36	-15.398	-13.932	-11.94	-9.406	-6.315	-2.655	1.585	6.412	11.835	17.858	24.488	31.728
1,3-dimethylnaphthalene	575-41-7		203.66	188.374	173.682	159.581	146.067	133.136	120.782	109.001	97.788	87.138	77.043	67.499	58.498	50.034	42.1	34.687	27.791	21.402	15.513	10.119	5.211	0.784	-3.168	-6.65	-9.666	-12.22	-14.313	-15.949	-17.125	-17.843	-18.101	-17.895	-17.223	-16.079	-14.46	-12.359	-9.77	-6.688	-3.105	0.985	5.588	10.712	16.363	22.546	29.269	36.537	44.355
1,3-propanediamine	109-76-2		-850.617	-811.099	-771.097	-730.624	-689.697	-648.333	-606.55	-564.373	-521.827	-478.948	-435.775	-392.363	-348.781	-305.12	-261.509	-218.129	-175.273	-133.451	-93.651	-57.798	-28.981	-10.073	-0.907	-1.272	-3.521	-5.783	-7.97	-10.002	-11.809	-13.333	-14.524	-15.343	-15.758	-15.742	-15.277	-14.345	-12.934	-11.035	-8.64	-5.741	-2.697	0.696	4.498	8.706	13.313	18.314	23.706
1,3-dithiolane	4829-04-03		47.523	43.081	39.047	35.396	32.097	29.12	26.43	23.989	21.76	19.703	17.779	15.951	14.183	12.444	10.709	8.959	7.182	5.373	3.534	1.674	-0.193	-2.048	-3.87	-6.139	-8.331	-10.232	-11.849	-13.184	-14.237	-15.004	-15.478	-15.646	-15.496	-15.012	-14.175	-12.967	-11.37	-9.364	-6.933	-4.057	-0.801	2.9	7.075	11.737	16.896	22.562	28.744
1,3-divinyl-1,1,3,3-tetramethyldisiloxane	2627-95-4		-197.068	-181.067	-164.884	-148.585	-132.244	-115.946	-99.782	-83.857	-68.294	-53.245	-38.909	-25.561	-13.563	-3.359	4.598	9.989	12.768	13.213	11.834	9.209	5.859	2.191	-1.502	-5.298	-8.73	-11.652	-14.059	-15.943	-17.299	-18.121	-18.404	-18.142	-17.331	-15.966	-14.042	-11.555	-8.5	-4.875	-0.675	4.104	9.464	15.409	21.943	29.067	36.786	45.101	54.015
1,3-hexadien-5-yne	10420-90-3		199.075	183.632	168.804	154.59	140.987	127.991	115.599	103.809	92.615	82.014	72.002	62.572	53.719	45.437	37.719	30.558	23.945	17.871	12.327	7.303	2.788	-1.231	-4.764	-7.826	-10.428	-12.585	-14.308	-15.612	-16.509	-17.009	-17.124	-16.862	-16.231	-15.237	-13.883	-12.171	-10.101	-7.671	-4.877	-1.715	1.152	3.984	6.849	9.693	12.466	15.123	17.633
1,3-propanedithiol	109-80-8		44.093	39.442	35.259	31.52	28.199	25.265	22.683	20.413	18.412	16.634	15.029	13.546	12.135	10.749	9.346	7.894	6.37	4.762	3.069	1.303	-0.517	-2.363	-4.203	-6.509	-8.735	-10.66	-12.289	-13.623	-14.661	-15.398	-15.826	-15.934	-15.708	-15.135	-14.199	-12.883	-11.171	-9.045	-6.491	-3.494	-0.412	2.958	6.685	10.765	15.193	19.963	25.07
1,4-bis(1-methylethyl)-benzene	100-18-5		211.965	196.741	182.073	167.955	154.382	141.349	128.849	116.879	105.432	94.503	84.089	74.185	64.788	55.894	47.5	39.605	32.208	25.307	18.904	12.997	7.589	2.682	-1.722	-5.621	-9.011	-11.889	-14.251	-16.092	-17.409	-18.197	-18.452	-18.171	-17.348	-15.979	-14.062	-11.591	-8.563	-4.976	-0.824	3.894	9.181	15.041	21.476	28.488	36.08	44.254	53.012
1,4-butanedithiol	1191-08-8		30.299	26.399	22.976	20.007	17.465	15.32	13.537	12.075	10.89	9.93	9.139	8.46	7.831	7.194	6.494	5.684	4.728	3.604	2.308	0.848	-0.752	-2.458	-4.224	-6.562	-8.851	-10.843	-12.537	-13.931	-15.018	-15.787	-16.228	-16.325	-16.064	-15.429	-14.403	-12.968	-11.111	-8.814	-6.064	-2.846	0.549	4.286	8.418	12.939	17.843	23.123	28.77
1,4-cyclooctadiene	1073-07-0		129.547	122.805	116.243	109.812	103.464	97.157	90.853	84.526	78.161	71.753	65.314	58.862	52.429	46.052	39.773	33.635	27.681	21.956	16.498	11.343	6.526	2.075	-1.982	-5.759	-9.1	-11.939	-14.27	-16.089	-17.39	-18.167	-18.414	-18.125	-17.295	-15.919	-13.991	-11.507	-8.462	-4.85	-0.669	4.087	9.42	15.335	21.835	28.923	36.602	44.874	53.743
1,4-dibromobutane	110-52-1		187.601	172.832	158.674	145.124	132.179	119.837	108.092	96.94	86.376	76.395	66.99	58.155	49.881	42.159	34.981	28.334	22.209	16.592	11.469	6.827	2.649	-1.079	-4.374	-7.252	-9.727	-11.815	-13.528	-14.878	-15.873	-16.52	-16.821	-16.776	-16.383	-15.635	-14.524	-13.038	-11.165	-8.89	-6.199	-3.075	0.435	4.384	8.8	13.696	19.087	24.983	31.397
1,4-diethylbenzene	105-05-5		206.396	191.36	176.891	162.983	149.632	136.83	124.572	112.85	101.66	90.994	80.846	71.21	62.081	53.454	45.322	37.684	30.534	23.869	17.689	11.992	6.776	2.044	-2.205	-5.967	-9.242	-12.024	-14.311	-16.097	-17.379	-18.151	-18.408	-18.145	-17.356	-16.036	-14.181	-11.784	-8.842	-5.348	-1.3	3.308	8.48	14.219	20.529	27.414	34.875	42.917	51.542
1,4-dichloro-2-butyne	821-10-3		191.284	175.884	161.107	146.953	133.418	120.501	108.201	96.514	85.438	74.971	65.109	55.849	47.186	39.116	31.635	24.735	18.411	12.656	7.459	2.812	-1.296	-4.879	-7.951	-10.529	-12.63	-14.275	-15.486	-16.287	-16.704	-16.763	-16.49	-15.911	-15.052	-13.932	-12.57	-10.977	-9.161	-7.121	-4.852	-2.341	-0.635	0.883	2.448	4.1	5.886	7.853	10.053
1,4-dichlorobutane	110-56-5		187.043	172.12	157.822	144.145	131.086	118.642	106.809	95.582	84.956	74.926	65.487	56.629	48.347	40.63	33.469	26.854	20.772	15.21	10.154	5.588	1.498	-2.136	-5.328	-8.097	-10.46	-12.433	-14.029	-15.261	-16.14	-16.672	-16.86	-16.705	-16.204	-15.349	-14.131	-12.538	-10.556	-8.169	-5.361	-2.114	1.556	5.686	10.299	15.408	21.028	27.172	33.851
1,4-difluoro-2-methylbenzene	452-67-5		214.822	198.723	183.233	168.351	154.074	140.398	127.321	114.841	102.952	91.653	80.94	70.808	61.252	52.27	43.855	36.002	28.707	21.963	15.765	10.106	4.979	0.378	-3.704	-7.275	-10.342	-12.911	-14.991	-16.588	-17.71	-18.361	-18.549	-18.278	-17.554	-16.378	-14.755	-12.686	-10.172	-7.211	-3.803	0.055	4.197	8.72	13.658	19.014	24.789	30.988	37.616
1,5,9-cyclododecatriene	706-31-0		115.702	112.762	109.445	105.662	101.356	96.514	91.16	85.355	79.183	72.74	66.126	59.433	52.745	46.134	39.663	33.383	27.338	21.566	16.1	10.966	6.19	1.794	-2.203	-5.906	-9.179	-11.962	-14.248	-16.032	-17.309	-18.071	-18.313	-18.028	-17.21	-15.853	-13.951	-11.499	-8.492	-4.923	-0.788	3.918	9.198	15.057	21.499	28.527	36.145	44.355	53.161
1,5-cyclooctadiene	111-78-4		77.929	72.527	67.571	63.028	58.857	55.013	51.445	48.097	44.906	41.811	38.75	35.665	32.508	29.244	25.854	22.336	18.708	15.001	11.26	7.538	3.893	0.381	-2.94	-6.329	-9.423	-12.07	-14.261	-15.987	-17.237	-18.001	-18.27	-18.032	-17.278	-15.998	-14.184	-11.828	-8.92	-5.455	-1.424	3.178	8.357	14.118	20.465	27.405	34.939	43.072	51.808
1,4-oxathiane	15980-15-1		-240.152	-230.779	-220.838	-210.339	-199.294	-187.719	-175.631	-163.055	-150.023	-136.575	-122.771	-108.688	-94.44	-80.187	-66.153	-52.646	-40.063	-28.867	-19.511	-12.329	-7.415	-4.594	-3.49	-5.11	-7.282	-9.268	-11.054	-12.618	-13.936	-14.981	-15.724	-16.137	-16.192	-15.862	-15.121	-13.946	-12.316	-10.212	-7.615	-4.511	-0.892	3.258	7.95	13.193	18.996	25.366	32.307
1,5-dichloro-pentane	628-76-2		186.612	171.822	157.652	144.099	131.159	118.828	107.101	95.974	85.441	75.495	66.128	57.334	49.102	41.424	34.288	27.682	21.595	16.011	10.918	6.299	2.139	-1.576	-4.864	-7.737	-10.21	-12.294	-14	-15.336	-16.305	-16.91	-17.149	-17.019	-16.514	-15.623	-14.335	-12.639	-10.519	-7.961	-4.951	-1.472	2.473	6.909	11.852	17.313	23.304	29.835	36.916
1,5-dichlorohexamethyltrisiloxane	3582-71-6		138.779	132.047	125.298	118.477	111.544	104.475	97.27	89.944	82.534	75.086	67.657	60.305	53.087	46.059	39.268	32.755	26.556	20.7	15.209	10.103	5.395	1.099	-2.777	-6.296	-9.379	-11.996	-14.147	-15.83	-17.043	-17.783	-18.046	-17.828	-17.123	-15.925	-14.228	-12.024	-9.307	-6.071	-2.307	1.991	6.829	12.214	18.153	24.651	31.714	39.347	47.556
1,5-dimethylcyclopentene	16491-15-9		181.651	170.888	160.396	150.143	140.101	130.247	120.564	111.044	101.685	92.496	83.49	74.689	66.118	57.808	49.789	42.092	34.75	27.791	21.243	15.131	9.479	4.305	-0.371	-4.602	-8.305	-11.445	-14.019	-16.02	-17.446	-18.29	-18.55	-18.221	-17.3	-15.785	-13.67	-10.955	-7.636	-3.71	0.824	5.968	11.725	18.096	25.083	32.687	40.91	49.753	59.217
1,5-hexadien-3-yne	821-08-9		210.289	194.313	178.959	164.226	150.11	136.608	123.718	111.436	99.758	88.679	78.195	68.301	58.992	50.26	42.101	34.505	27.467	20.977	15.027	9.608	4.71	0.323	-3.562	-6.957	-9.871	-12.314	-14.296	-15.825	-16.909	-17.554	-17.767	-17.55	-16.906	-15.836	-14.339	-12.411	-10.049	-7.246	-3.997	-0.293	3.819	8.382	13.416	18.93	24.933	31.435	38.444
1,6-diisocyanatohexane	822-06-0		130.78	119.982	109.755	100.088	90.971	82.391	74.332	66.776	59.706	53.1	46.933	41.181	35.815	30.807	26.127	21.747	17.639	13.777	10.141	6.715	3.489	0.46	-2.371	-5.212	-7.842	-10.156	-12.141	-13.784	-15.068	-15.976	-16.49	-16.591	-16.263	-15.488	-14.252	-12.538	-10.334	-7.627	-4.405	-0.659	3.621	8.442	13.812	19.739	26.226	33.281	40.906
1,5-hexadiyne	628-16-0		176.215	161.833	148.066	134.909	122.361	110.419	99.078	88.336	78.186	68.624	59.644	51.24	43.404	36.127	29.4	23.213	17.554	12.41	7.765	3.606	-0.086	-3.328	-6.14	-8.565	-10.604	-12.268	-13.579	-14.555	-15.212	-15.567	-15.63	-15.41	-14.911	-14.135	-13.079	-11.735	-10.093	-8.142	-5.868	-3.253	-1.206	0.703	2.616	4.507	6.359	8.163	9.923
1,6-dimethylnaphthalene	575-43-9		203.26	188.006	173.345	159.274	145.788	132.884	120.556	108.8	97.611	86.982	76.908	67.383	58.4	49.952	42.032	34.633	27.747	21.368	15.488	10.101	5.198	0.776	-3.173	-6.653	-9.668	-12.221	-14.315	-15.95	-17.128	-17.847	-18.105	-17.899	-17.226	-16.082	-14.461	-12.358	-9.766	-6.679	-3.091	1.006	5.617	10.749	16.41	22.605	29.34	36.621	44.454
1,6-heptadiyne	2396-63-6		172.638	158.714	145.384	132.646	120.496	108.929	97.943	87.53	77.686	68.404	59.678	51.5	43.86	36.75	30.158	24.074	18.485	13.376	8.735	4.545	0.792	-2.542	-5.472	-8.068	-10.3	-12.159	-13.66	-14.814	-15.632	-16.12	-16.283	-16.123	-15.64	-14.829	-13.686	-12.203	-10.371	-8.179	-5.618	-2.675	-0.122	2.387	4.958	7.555	10.145	12.706	15.224
1,6-heptadiene	3070-53-9		189.046	175.381	162.227	149.578	137.427	125.768	114.595	103.9	93.678	83.921	74.623	65.78	57.385	49.434	41.922	34.847	28.207	21.999	16.224	10.882	5.975	1.506	-2.521	-6.171	-9.374	-12.098	-14.339	-16.092	-17.353	-18.114	-18.372	-18.118	-17.347	-16.051	-14.224	-11.859	-8.949	-5.488	-1.47	3.112	8.263	13.988	20.292	27.181	34.658	42.728	51.395
1,6-hexanedithiol	1191-43-1		21.478	18.221	15.452	13.149	11.287	9.832	8.749	7.992	7.51	7.245	7.131	7.094	7.058	6.945	6.684	6.213	5.486	4.479	3.19	1.642	-0.122	-2.045	-4.059	-6.64	-9.146	-11.322	-13.161	-14.653	-15.787	-16.552	-16.933	-16.918	-16.49	-15.638	-14.348	-12.606	-10.402	-7.724	-4.564	-0.911	2.999	7.289	11.997	17.113	22.626	28.524	34.793
1,7-dimethylnaphthalene	575-37-1		203.395	188.137	173.471	159.394	145.903	132.992	120.659	108.896	97.7	87.065	76.985	67.453	58.463	50.008	42.082	34.676	27.785	21.4	15.515	10.122	5.216	0.789	-3.163	-6.645	-9.662	-12.217	-14.312	-15.949	-17.127	-17.846	-18.104	-17.899	-17.226	-16.082	-14.462	-12.36	-9.77	-6.685	-3.101	0.992	5.598	10.724	16.378	22.564	29.29	36.56	44.381
1,8-octanedithiol	1191-62-4		25.58	22.303	19.517	17.198	15.32	13.85	12.748	11.967	11.452	11.139	10.955	10.82	10.649	10.358	9.87	9.121	8.07	6.699	5.022	3.076	0.919	-1.374	-3.724	-6.542	-9.231	-11.554	-13.502	-15.065	-16.229	-16.984	-17.316	-17.214	-16.665	-15.659	-14.185	-12.235	-9.799	-6.869	-3.44	0.495	4.732	9.372	14.443	19.935	25.833	32.123	38.79
1,8-nonadiyne	2396-65-8		168.809	155.375	142.518	130.235	118.52	107.367	96.771	86.725	77.221	68.25	59.805	51.874	44.447	37.513	31.059	25.072	19.54	14.448	9.783	5.531	1.68	-1.782	-4.867	-7.667	-10.118	-12.19	-13.889	-15.219	-16.181	-16.774	-16.997	-16.844	-16.312	-15.393	-14.081	-12.368	-10.246	-7.709	-4.75	-1.362	1.836	5.098	8.489	11.962	15.468	18.963	22.414
1,9-nonanedithiol	3489-28-9		26.409	23.333	20.742	18.611	16.91	15.604	14.65	13.997	13.584	13.344	13.196	13.056	12.836	12.45	11.821	10.891	9.625	8.02	6.098	3.911	1.528	-0.971	-3.498	-6.433	-9.207	-11.6	-13.6	-15.196	-16.378	-17.133	-17.449	-17.316	-16.722	-15.659	-14.117	-12.087	-9.562	-6.536	-3.004	1.04	5.403	10.177	15.389	21.025	27.072	33.512	40.33
1-(1,1-dimethylethyl)-3,5-dimethylbenzene	98-19-1		208.526	193.553	179.131	165.255	151.918	139.113	126.835	115.077	103.834	93.099	82.867	73.134	63.895	55.146	46.885	39.11	31.818	25.01	18.685	12.845	7.492	2.627	-1.745	-5.62	-8.996	-11.866	-14.227	-16.072	-17.397	-18.197	-18.465	-18.197	-17.387	-16.03	-14.122	-11.658	-8.633	-5.044	-0.886	3.845	9.151	15.037	21.505	28.558	36.199	44.431	53.255
1-(1,1-dimethylethyl)-3-methylbenzene	1075-38-3		206.785	191.771	177.32	163.425	150.081	137.283	125.023	113.296	102.096	91.416	81.251	71.595	62.443	53.79	45.633	37.966	30.788	24.096	17.888	12.164	6.923	2.167	-2.104	-5.886	-9.178	-11.976	-14.275	-16.073	-17.363	-18.143	-18.405	-18.147	-17.362	-16.046	-14.193	-11.799	-8.86	-5.37	-1.325	3.278	8.443	14.175	20.477	27.351	34.802	42.831	51.443
1-(1-methylethenyl)-4-(1-methylethyl)benzene	2388-14-9		209.582	194.185	179.37	165.131	151.465	138.366	125.83	113.852	102.426	91.548	81.211	71.41	62.141	53.397	45.173	37.465	30.268	23.578	17.39	11.701	6.508	1.809	-2.398	-6.114	-9.34	-12.075	-14.319	-16.071	-17.328	-18.088	-18.349	-18.106	-17.357	-16.098	-14.324	-12.032	-9.216	-5.873	-1.998	2.414	7.366	12.862	18.908	25.506	32.661	40.377	48.656
1-(2,5-dimethylphenyl)ethanone	2142-73-6		-224.821	-215.62	-205.875	-195.601	-184.816	-173.539	-161.795	-149.613	-137.028	-124.085	-110.845	-97.387	-83.824	-70.316	-57.091	-44.468	-32.861	-22.759	-14.628	-8.78	-5.243	-3.747	-3.826	-6.09	-8.68	-10.989	-12.988	-14.648	-15.941	-16.844	-17.335	-17.394	-17.004	-16.151	-14.822	-13.003	-10.686	-7.862	-4.522	-0.659	3.727	8.647	14.105	20.107	26.658	33.761	41.42
1-(3,4-dimethylphenyl)ethanone	3637-01-02		-221.089	-211.959	-202.342	-192.253	-181.712	-170.741	-159.366	-147.613	-135.519	-123.122	-110.476	-97.648	-84.729	-71.851	-59.198	-47.029	-35.69	-25.6	-17.197	-10.827	-6.627	-4.458	-3.962	-5.951	-8.392	-10.605	-12.553	-14.204	-15.525	-16.487	-17.063	-17.23	-16.965	-16.251	-15.07	-13.409	-11.255	-8.596	-5.422	-1.726	2.495	7.251	12.55	18.397	24.797	31.754	39.274
1-(4-methoxyphenyl)-2-propanone	122-84-9		-204.14	-195.538	-186.477	-176.97	-167.03	-156.674	-145.925	-134.811	-123.367	-111.64	-99.692	-87.608	-75.503	-63.532	-51.906	-40.895	-30.825	-22.049	-14.882	-9.523	-5.993	-4.125	-3.615	-5.321	-7.458	-9.413	-11.167	-12.698	-13.983	-14.996	-15.71	-16.1	-16.14	-15.806	-15.073	-13.92	-12.328	-10.276	-7.75	-4.733	-1.224	2.797	7.343	12.425	18.052	24.231	30.97
1-(dimethylamino)-2-propanol	108-16-7		-446.916	-424.267	-401.991	-380.062	-358.421	-336.985	-315.66	-294.352	-272.977	-251.462	-229.754	-207.815	-185.634	-163.224	-140.639	-117.996	-95.524	-73.643	-53.072	-34.896	-20.405	-10.546	-5.298	-6.18	-8.406	-10.532	-12.482	-14.186	-15.578	-16.602	-17.211	-17.364	-17.029	-16.179	-14.792	-12.85	-10.34	-7.25	-3.57	0.705	5.537	10.95	16.946	23.515	30.635	38.268	46.348
1-(ethenyloxy)decane	765-05-9		5.701	5.879	6.553	7.687	9.233	11.132	13.306	15.657	18.06	20.367	22.405	23.991	24.946	25.126	24.446	22.899	20.557	17.554	14.066	10.275	6.356	2.46	-1.285	-5.081	-8.518	-11.446	-13.857	-15.743	-17.097	-17.912	-18.182	-17.901	-17.065	-15.669	-13.708	-11.18	-8.081	-4.409	-0.161	4.666	10.065	16.043	22.6	29.739	37.458	45.76	54.642
1-(methylthio)-propane	3877-15-4		-23.534	-24.562	-25.055	-25.031	-24.508	-23.512	-22.071	-20.227	-18.029	-15.541	-12.841	-10.029	-7.221	-4.553	-2.171	-0.219	1.176	1.922	1.982	1.379	0.19	-1.466	-3.448	-6.253	-9.03	-11.458	-13.521	-15.199	-16.473	-17.322	-17.729	-17.675	-17.143	-16.117	-14.583	-12.528	-9.941	-6.81	-3.126	1.117	5.929	11.314	17.278	23.827	30.964	38.693	47.018
1-(methylthio)butane	628-29-5		-19.81	-20.627	-20.924	-20.718	-20.032	-18.892	-17.335	-15.403	-13.154	-10.658	-8.003	-5.297	-2.667	-0.256	1.788	3.323	4.235	4.459	3.986	2.87	1.214	-0.845	-3.158	-6.148	-9.048	-11.568	-13.692	-15.402	-16.681	-17.509	-17.872	-17.754	-17.14	-16.017	-14.373	-12.197	-9.48	-6.213	-2.388	2.001	6.96	12.495	18.609	25.308	32.594	40.47	48.939
1-acetylpiperidine	618-42-8		-412.238	-396.168	-379.592	-362.522	-344.969	-326.948	-308.47	-289.55	-270.202	-250.443	-230.287	-209.756	-188.873	-167.672	-146.207	-124.568	-102.915	-81.541	-60.962	-42.02	-25.892	-13.78	-6.285	-6.117	-7.822	-9.629	-11.438	-13.149	-14.67	-15.918	-16.826	-17.336	-17.404	-16.992	-16.072	-14.622	-12.623	-10.063	-6.931	-3.217	1.083	5.975	11.465	17.553	24.245	31.54	39.442
1-bromo-2-chloroethane	107-04-0		198.237	182.66	167.707	153.378	139.669	126.579	114.106	102.246	90.996	80.354	70.316	60.876	52.031	43.774	36.1	29.002	22.471	16.499	11.075	6.189	1.827	-2.023	-5.377	-8.252	-10.665	-12.635	-14.181	-15.324	-16.082	-16.476	-16.522	-16.237	-15.633	-14.719	-13.501	-11.98	-10.154	-8.016	-5.554	-2.755	-0.113	2.696	5.791	9.195	12.932	17.027	21.504
1-bromo-2-propanone	598-31-2		-111.5	-108.17	-104.302	-99.91	-95.013	-89.632	-83.794	-77.533	-70.893	-63.931	-56.72	-49.355	-41.96	-34.688	-27.723	-21.274	-15.559	-10.771	-7.049	-4.446	-2.919	-2.343	-2.537	-4.235	-6.183	-7.936	-9.491	-10.845	-11.99	-12.915	-13.607	-14.051	-14.229	-14.123	-13.713	-12.98	-11.904	-10.465	-8.645	-6.424	-4.261	-1.873	0.842	3.892	7.284	11.027	15.129
1-bromo-3-methylbutane	107-82-4		204.13	188.988	174.434	160.465	147.074	134.255	122.002	110.308	99.168	88.573	78.516	68.991	59.989	51.504	43.529	36.057	29.081	22.597	16.598	11.079	6.039	1.472	-2.622	-6.245	-9.396	-12.076	-14.283	-16.014	-17.266	-18.036	-18.32	-18.114	-17.412	-16.209	-14.502	-12.284	-9.551	-6.297	-2.519	1.789	6.612	11.965	17.855	24.285	31.259	38.778	46.847
1-bromo-2-chloroethene	3018-09-05		230.182	213.158	196.76	180.987	165.839	151.313	137.409	124.125	111.46	99.411	87.976	77.154	66.943	57.339	48.339	39.941	32.14	24.933	18.315	12.281	6.825	1.942	-2.377	-6.139	-9.353	-12.029	-14.178	-15.811	-16.943	-17.586	-17.756	-17.47	-16.744	-15.594	-14.04	-12.097	-9.781	-7.107	-4.087	-0.732	1.906	4.327	6.7	9.022	11.303	13.575	15.877
1-bromodecane	112-29-5		215.326	199.918	185.07	170.775	157.028	143.823	131.155	119.018	107.407	96.318	85.747	75.689	66.141	57.101	48.567	40.537	33.011	25.989	19.472	13.461	7.957	2.964	-1.516	-5.48	-8.925	-11.846	-14.24	-16.103	-17.432	-18.223	-18.471	-18.175	-17.33	-15.934	-13.983	-11.477	-8.411	-4.786	-0.598	4.153	9.461	15.332	21.767	28.765	36.328	44.454	53.144
1-bromoheptane	629-04-9		208.75	193.533	178.891	164.818	151.309	138.356	125.955	114.097	102.778	91.989	81.726	71.983	62.752	54.03	45.811	38.092	30.869	24.138	17.899	12.149	6.889	2.118	-2.163	-5.951	-9.245	-12.041	-14.337	-16.128	-17.412	-18.184	-18.439	-18.174	-17.385	-16.067	-14.218	-11.833	-8.908	-5.442	-1.431	3.128	8.228	13.876	20.075	26.828	34.135	41.998	50.416
1-bromohexane	111-25-1		206.082	190.931	176.363	162.372	148.95	136.092	123.792	112.042	100.836	90.167	80.027	70.411	61.311	52.721	44.635	37.047	29.954	23.349	17.231	11.597	6.444	1.772	-2.419	-6.129	-9.356	-12.097	-14.35	-16.112	-17.378	-18.144	-18.407	-18.16	-17.401	-16.124	-14.324	-11.999	-9.142	-5.751	-1.822	2.649	7.655	13.204	19.301	25.948	33.147	40.9	49.209
1-bromododecane	143-15-7		219.109	203.554	188.552	174.097	160.184	146.808	133.965	121.649	109.858	98.586	87.832	77.592	67.865	58.65	49.945	41.75	34.067	26.896	20.239	14.098	8.476	3.376	-1.199	-5.246	-8.761	-11.739	-14.179	-16.075	-17.425	-18.224	-18.47	-18.16	-17.29	-15.859	-13.864	-11.303	-8.174	-4.476	-0.207	4.632	10.038	16.013	22.56	29.677	37.364	45.622	54.449
1-bromooctane	111-83-1		211.543	196.23	181.488	167.309	153.688	140.62	128.098	116.116	104.668	93.749	83.353	73.475	64.11	55.255	46.904	39.057	31.709	24.859	18.507	12.652	7.294	2.434	-1.925	-5.782	-9.134	-11.978	-14.311	-16.129	-17.428	-18.205	-18.456	-18.177	-17.364	-16.015	-14.126	-11.694	-8.716	-5.189	-1.112	3.518	8.694	14.422	20.705	27.544	34.94	42.894	51.405
1-bromopropane	106-94-5		195.929	180.979	166.637	152.898	139.757	127.208	115.245	103.862	93.051	82.805	73.115	63.973	55.369	47.294	39.737	32.688	26.136	20.072	14.485	9.365	4.703	0.491	-3.279	-6.612	-9.514	-11.988	-14.034	-15.654	-16.846	-17.606	-17.93	-17.812	-17.247	-16.226	-14.741	-12.784	-10.346	-7.418	-3.993	-0.06	4.374	9.325	14.804	20.817	27.372	34.473	42.127
1-butoxy-2-propanol	5131-66-8		-325.022	-311.939	-298.311	-284.146	-269.451	-254.235	-238.509	-222.289	-205.591	-188.439	-170.866	-152.914	-134.648	-116.164	-97.614	-79.241	-61.435	-44.783	-30.081	-18.211	-9.818	-4.977	-3.135	-5.167	-7.908	-10.376	-12.525	-14.312	-15.699	-16.651	-17.139	-17.139	-16.628	-15.591	-14.011	-11.878	-9.18	-5.911	-2.063	2.37	7.204	12.482	18.179	24.209	30.44	36.674	42.619
1-bromopentane	110-53-2		202.799	187.729	173.249	159.353	146.035	133.289	121.109	109.487	98.416	87.89	77.9	68.438	59.497	51.07	43.148	35.726	28.796	22.352	16.39	10.904	5.891	1.349	-2.725	-6.33	-9.468	-12.135	-14.331	-16.053	-17.296	-18.057	-18.331	-18.113	-17.398	-16.18	-14.454	-12.215	-9.457	-6.176	-2.367	1.976	6.846	12.253	18.202	24.698	31.742	39.339	47.49
1-butyl-1h-pyrrole	589-33-3		73.54	66.937	60.845	55.243	50.108	45.414	41.13	37.221	33.649	30.368	27.333	24.493	21.797	19.195	16.642	14.1	11.539	8.943	6.309	3.65	0.987	-1.644	-4.202	-7.041	-9.707	-12.011	-13.942	-15.488	-16.638	-17.377	-17.692	-17.571	-17	-15.966	-14.458	-12.466	-9.978	-6.986	-3.482	0.543	5.06	10.095	15.66	21.757	28.391	35.565	43.28
1-chloro-2-(chloromethyl)benzene	611-19-8		198.62	183.415	168.798	154.768	141.323	128.46	116.176	104.469	93.335	82.772	72.774	63.34	54.463	46.139	38.363	31.129	24.432	18.263	12.617	7.485	2.859	-1.27	-4.913	-8.078	-10.776	-13.017	-14.813	-16.173	-17.108	-17.628	-17.74	-17.453	-16.773	-15.704	-14.249	-12.409	-10.184	-7.57	-4.562	-1.155	2.465	6.42	10.755	15.481	20.607	26.144	32.103
1-chloro-2,4-dimethylbenzene	95-66-9		219.149	202.982	187.418	172.454	158.088	144.315	131.133	118.54	106.53	95.101	84.249	73.969	64.258	55.111	46.523	38.49	31.007	24.068	17.671	11.808	6.477	1.671	-2.613	-6.38	-9.634	-12.378	-14.616	-16.35	-17.583	-18.316	-18.552	-18.289	-17.53	-16.272	-14.516	-12.259	-9.5	-6.236	-2.464	1.819	6.603	11.9	17.716	24.054	30.918	38.312	46.239
1-chloro-2,2-dimethylpropane	753-89-9		209.41	193.967	179.114	164.848	151.161	138.05	125.508	113.53	102.109	91.24	80.916	71.13	61.878	53.152	44.947	37.258	30.079	23.406	17.234	11.56	6.381	1.695	-2.5	-6.205	-9.419	-12.143	-14.374	-16.111	-17.352	-18.094	-18.333	-18.066	-17.288	-15.996	-14.185	-11.851	-8.99	-5.597	-1.668	2.802	7.811	13.366	19.473	26.134	33.354	41.135	49.481
1-chloro-2-(1-methylethyl)benzene	2077-13-6		224.218	207.805	191.994	176.781	162.165	148.142	134.712	121.87	109.614	97.941	86.848	76.332	66.389	57.016	48.209	39.966	32.281	25.153	18.576	12.547	7.063	2.119	-2.288	-6.162	-9.505	-12.322	-14.616	-16.389	-17.644	-18.383	-18.609	-18.323	-17.527	-16.222	-14.408	-12.086	-9.256	-5.916	-2.067	2.293	7.148	12.511	18.385	24.773	31.676	39.098	47.041
1-chloro-2-ethylbenzene	89-96-3		222.117	205.774	190.035	174.897	160.357	146.415	133.066	120.308	108.138	96.552	85.549	75.123	65.272	55.992	47.279	39.129	31.537	24.5	18.012	12.07	6.669	1.804	-2.529	-6.335	-9.618	-12.382	-14.631	-16.37	-17.601	-18.328	-18.554	-18.28	-17.509	-16.242	-14.48	-12.223	-9.472	-6.224	-2.48	1.763	6.486	11.704	17.423	23.645	30.375	37.615	45.369
1-chloro-2-methylbenzene	95-49-8		217.428	201.25	185.679	170.714	156.352	142.59	129.427	116.858	104.88	93.491	82.686	72.462	62.813	53.737	45.227	37.28	29.889	23.049	16.755	11	5.779	1.084	-3.089	-6.748	-9.898	-12.545	-14.695	-16.354	-17.525	-18.215	-18.425	-18.159	-17.419	-16.206	-14.522	-12.365	-9.735	-6.629	-3.044	1.022	5.552	10.564	16.066	22.063	28.56	35.563	43.078
1-chloro-2-methyl-propane	513-36-0		202.788	187.598	173.006	159.01	145.602	132.778	120.53	108.853	97.738	87.179	77.169	67.698	58.76	50.346	42.448	35.058	28.17	21.775	15.867	10.44	5.49	1.011	-2.999	-6.543	-9.621	-12.234	-14.381	-16.059	-17.266	-17.998	-18.25	-18.017	-17.294	-16.076	-14.354	-12.125	-9.381	-6.116	-2.325	1.999	6.857	12.256	18.203	24.702	31.757	39.374	47.555
1-chloro-2-methyl-2-propanol	558-42-9		-220.583	-210.838	-200.524	-189.652	-178.235	-166.289	-153.835	-140.903	-127.532	-113.777	-99.717	-85.468	-71.203	-57.177	-43.75	-31.402	-20.695	-12.161	-6.13	-2.589	-1.192	-1.4	-2.657	-5.258	-7.906	-10.196	-12.119	-13.666	-14.828	-15.595	-15.96	-15.914	-15.45	-14.561	-13.241	-11.483	-9.281	-6.632	-3.53	0.028	3.304	6.347	8.954	10.653	10.827	8.789	3.974
1-chloro-3-bromopropane	109-70-6		191.415	176.272	161.749	147.846	134.56	121.887	109.824	98.369	87.516	77.262	67.601	58.527	50.034	42.115	34.761	27.963	21.711	15.993	10.797	6.109	1.914	-1.803	-5.06	-7.874	-10.263	-12.245	-13.837	-15.055	-15.913	-16.423	-16.594	-16.433	-15.942	-15.118	-13.958	-12.453	-10.592	-8.36	-5.743	-2.722	0.616	4.354	8.528	13.156	18.253	23.835	29.915
1-chloro-3-ethylbenzene	620-16-6		220.899	204.575	188.858	173.747	159.239	145.331	132.021	119.305	107.18	95.643	84.691	74.318	64.522	55.299	46.644	38.551	31.018	24.039	17.608	11.722	6.374	1.56	-2.725	-6.487	-9.729	-12.457	-14.676	-16.388	-17.598	-18.31	-18.525	-18.247	-17.476	-16.214	-14.462	-12.219	-9.485	-6.259	-2.538	1.679	6.357	11.52	17.179	23.336	29.995	37.159	44.831
1-chloro-4-(trifluoromethyl)-benzene	98-56-6		233.021	215.755	199.121	183.118	167.746	153.003	138.887	125.398	112.533	100.291	88.67	77.668	67.283	57.512	48.351	39.799	31.851	24.504	17.752	11.592	6.018	1.024	-3.396	-7.251	-10.547	-13.293	-15.499	-17.174	-18.329	-18.976	-19.126	-18.791	-17.984	-16.717	-15.001	-12.848	-10.269	-7.271	-3.863	-0.051	3.78	7.831	12.167	16.787	21.691	26.887	32.385
1-chloro-4-(1-methylethyl)benzene	2621-46-7		224.075	207.625	191.781	176.54	161.9	147.858	134.411	121.557	109.293	97.616	86.523	76.01	66.074	56.711	47.917	39.69	32.024	24.916	18.362	12.357	6.898	1.98	-2.401	-6.249	-9.568	-12.362	-14.634	-16.389	-17.628	-18.356	-18.575	-18.287	-17.493	-16.197	-14.398	-12.098	-9.297	-5.994	-2.19	2.118	6.89	12.15	17.906	24.161	30.915	38.171	45.93
1-chloro-4-fluorobenzene	352-33-0		218.39	202	186.22	171.051	156.49	142.536	129.187	116.442	104.299	92.755	81.808	71.456	61.696	52.525	43.938	35.934	28.506	21.651	15.363	9.636	4.465	-0.158	-4.241	-7.791	-10.818	-13.332	-15.342	-16.859	-17.895	-18.461	-18.569	-18.23	-17.455	-16.255	-14.639	-12.615	-10.189	-7.368	-4.153	-0.544	3.132	7.063	11.314	15.891	20.802	26.058	31.671
1-chloro-4-ethylbenzene	622-98-0		221.061	204.723	188.993	173.869	159.348	145.428	132.105	119.377	107.242	95.694	84.732	74.35	64.546	55.314	46.652	38.554	31.015	24.032	17.598	11.709	6.361	1.546	-2.738	-6.498	-9.739	-12.464	-14.679	-16.388	-17.595	-18.303	-18.515	-18.235	-17.463	-16.202	-14.452	-12.214	-9.487	-6.271	-2.563	1.637	6.289	11.42	17.042	23.156	29.767	36.877	44.489
1-chloronaphthalene	90-13-1		216.041	199.874	184.314	169.359	155.009	141.26	128.112	115.561	103.605	92.241	81.467	71.278	61.671	52.642	44.187	36.3	28.977	22.211	15.998	10.33	5.2	0.601	-3.475	-7.034	-10.087	-12.64	-14.703	-16.284	-17.39	-18.029	-18.209	-17.935	-17.213	-16.048	-14.443	-12.4	-9.919	-7.001	-3.642	0.159	4.365	9.006	14.097	19.642	25.651	32.13	39.087
1-chlorooctane	111-85-3		212.001	196.677	181.923	167.732	154.1	141.02	128.485	116.49	105.029	94.095	83.683	73.789	64.408	55.535	47.166	39.3	31.934	25.066	18.696	12.824	7.45	2.576	-1.796	-5.663	-9.024	-11.873	-14.209	-16.027	-17.323	-18.093	-18.334	-18.041	-17.211	-15.841	-13.927	-11.466	-8.456	-4.893	-0.776	3.898	9.126	14.911	21.257	28.164	35.632	43.664	52.259
1-chloropentane	543-59-9		202.735	187.643	173.143	159.23	145.898	133.14	120.95	109.32	98.244	87.713	77.72	68.258	59.318	50.893	42.975	35.557	28.634	22.198	16.244	10.769	5.768	1.239	-2.82	-6.409	-9.527	-12.174	-14.348	-16.045	-17.261	-17.992	-18.234	-17.982	-17.23	-15.972	-14.204	-11.92	-9.115	-5.783	-1.92	2.479	7.413	12.89	18.914	25.488	32.616	40.301	48.546
1-chlorohexane	544-10-5		206.372	191.193	176.598	162.581	149.135	136.255	123.933	112.164	100.939	90.253	80.097	70.466	61.352	52.75	44.654	37.057	29.956	23.345	17.223	11.586	6.433	1.763	-2.424	-6.127	-9.345	-12.075	-14.315	-16.06	-17.307	-18.052	-18.29	-18.018	-17.229	-15.921	-14.088	-11.726	-8.831	-5.399	-1.426	3.091	8.15	13.758	19.917	26.631	33.901	41.729	50.118
1-chloroheptane	629-06-1		209.325	194.074	179.399	165.295	151.756	138.774	126.345	114.46	103.114	92.3	82.013	72.245	62.992	54.248	46.009	38.27	31.028	24.281	18.027	12.264	6.992	2.211	-2.076	-5.869	-9.165	-11.961	-14.254	-16.04	-17.315	-18.075	-18.316	-18.033	-17.224	-15.883	-14.007	-11.593	-8.636	-5.134	-1.084	3.517	8.667	14.37	20.63	27.447	34.825	42.763	51.263
1-chlorononane	2473-01-0		213.886	198.523	183.724	169.482	155.793	142.649	130.045	117.976	106.435	95.419	84.92	74.937	65.463	56.498	48.036	40.078	32.621	25.665	19.211	13.258	7.809	2.866	-1.568	-5.491	-8.9	-11.791	-14.159	-16.002	-17.314	-18.093	-18.335	-18.036	-17.193	-15.801	-13.86	-11.365	-8.314	-4.705	-0.537	4.193	9.483	15.335	21.752	28.734	36.281	44.395	53.075
1-cis-2-trans-3-trimethylcyclopentane	15890-40-1		268.676	249.798	231.564	213.973	197.026	180.722	165.06	150.042	135.666	121.932	108.84	96.39	84.582	73.415	62.89	53.006	43.762	35.16	27.198	19.877	13.196	7.156	1.755	-3.005	-7.126	-10.606	-13.447	-15.649	-17.21	-18.133	-18.415	-18.059	-17.062	-15.427	-13.152	-10.238	-6.684	-2.491	2.341	7.813	13.924	20.675	28.065	36.095	44.765	54.074	64.023
1-decanethiol	143-10-2		51.825	48.332	45.314	42.743	40.581	38.783	37.292	36.04	34.944	33.91	32.836	31.612	30.135	28.318	26.103	23.468	20.43	17.047	13.405	9.607	5.764	1.981	-1.645	-5.311	-8.638	-11.481	-13.829	-15.67	-16.996	-17.799	-18.07	-17.803	-16.993	-15.635	-13.725	-11.26	-8.237	-4.656	-0.516	4.185	9.329	14.963	21.096	27.713	34.795	42.325	50.278
1-decene	872-05-9		219.824	205.092	190.801	176.947	163.526	150.535	137.976	125.849	114.156	102.902	92.093	81.734	71.833	62.398	53.439	44.964	36.983	29.503	22.536	16.089	10.172	4.791	-0.044	-4.357	-8.112	-11.294	-13.898	-15.92	-17.358	-18.207	-18.465	-18.128	-17.195	-15.663	-13.528	-10.79	-7.446	-3.495	1.066	6.238	12.021	18.418	25.429	33.056	41.299	50.16	59.638
1-cyclopropylethanone	765-43-5		-265.002	-255.209	-244.893	-234.067	-222.744	-210.94	-198.672	-185.96	-172.828	-159.302	-145.415	-131.21	-116.74	-102.083	-87.35	-72.706	-58.4	-44.791	-32.36	-21.68	-13.287	-7.498	-4.266	-5.294	-7.371	-9.384	-11.277	-12.991	-14.468	-15.657	-16.508	-16.981	-17.039	-16.652	-15.794	-14.444	-12.584	-10.198	-7.275	-3.805	0.222	4.814	9.976	15.714	22.034	28.94	36.435
1-dodecene	112-41-4		222.486	207.655	193.255	179.283	165.736	152.614	139.918	127.65	115.817	104.422	93.473	82.978	72.946	63.386	54.308	45.721	37.636	30.061	23.007	16.481	10.493	5.051	0.161	-4.195	-7.987	-11.198	-13.825	-15.865	-17.315	-18.17	-18.429	-18.089	-17.148	-15.603	-13.451	-10.692	-7.324	-3.345	1.247	6.453	12.273	18.71	25.763	33.435	41.725	50.634	60.164
1-dodecanethiol	112-55-0		56.926	53.424	50.391	47.795	45.597	43.746	42.181	40.827	39.595	38.385	37.087	35.589	33.789	31.606	28.994	25.947	22.502	18.731	14.733	10.621	6.508	2.499	-1.31	-5.091	-8.501	-11.41	-13.808	-15.685	-17.033	-17.844	-18.111	-17.828	-16.991	-15.595	-13.637	-11.115	-8.026	-4.371	-0.148	4.643	9.898	15.658	21.928	28.695	35.941	43.647	51.791
1-decyne	764-93-2		191.621	177.908	164.71	152.02	139.827	128.123	116.899	106.145	95.854	86.018	76.628	67.68	59.167	51.086	43.434	36.21	29.415	23.049	17.118	11.624	6.573	1.972	-2.172	-5.908	-9.177	-11.949	-14.222	-15.989	-17.247	-17.991	-18.217	-17.923	-17.106	-15.764	-13.897	-11.505	-8.588	-5.148	-1.189	3.285	7.918	12.813	17.971	23.323	28.794	34.301	39.763
1-dodecyne	765-03-7		195.738	181.968	168.697	155.914	143.611	131.779	120.411	109.496	99.03	89.004	79.415	70.257	61.528	53.228	45.355	37.913	30.903	24.331	18.203	12.524	7.301	2.544	-1.741	-5.594	-8.962	-11.817	-14.156	-15.973	-17.265	-18.026	-18.255	-17.947	-17.102	-15.718	-13.793	-11.33	-8.329	-4.792	-0.722	3.876	8.687	13.797	19.203	24.837	30.623	36.478	42.314
1-ethoxy-2-propanol-acetate	54839-24-6		-219.427	-210.504	-201.162	-191.421	-181.303	-170.83	-160.024	-148.912	-137.519	-125.877	-114.019	-101.993	-89.858	-77.698	-65.636	-53.845	-42.569	-32.127	-22.903	-15.283	-9.564	-5.849	-4.002	-5.539	-7.847	-9.988	-11.921	-13.605	-14.996	-16.054	-16.741	-17.022	-16.867	-16.249	-15.145	-13.535	-11.401	-8.729	-5.508	-1.726	2.622	7.545	13.05	19.142	25.825	33.103	40.979
1-ethoxy-2-fluorobenzene	451-80-9		21.974	19.922	18.393	17.354	16.761	16.561	16.686	17.05	17.553	18.078	18.496	18.678	18.503	17.878	16.749	15.107	12.994	10.487	7.691	4.719	1.682	-1.318	-4.198	-7.175	-9.879	-12.175	-14.066	-15.555	-16.639	-17.319	-17.592	-17.454	-16.899	-15.921	-14.512	-12.665	-10.371	-7.62	-4.403	-0.709	3.424	8.033	13.135	18.738	24.85	31.478	38.628
1-ethoxy-4-fluorobenzene	459-26-7		13.934	12.922	12.42	12.392	12.795	13.567	14.634	15.897	17.238	18.519	19.584	20.277	20.458	20.022	18.92	17.168	14.841	12.056	8.954	5.679	2.363	-0.881	-3.962	-7.079	-9.883	-12.251	-14.189	-15.699	-16.785	-17.45	-17.693	-17.514	-16.911	-15.883	-14.423	-12.528	-10.19	-7.404	-4.162	-0.455	3.643	8.187	13.2	18.69	24.664	31.129	38.09
1-ethoxybutane	628-81-9		-296.191	-284.714	-272.627	-259.937	-246.654	-232.787	-218.352	-203.362	-187.84	-171.81	-155.308	-138.384	-121.109	-103.595	-86.021	-68.673	-52.005	-36.684	-23.564	-13.487	-6.927	-3.713	-3.128	-5.706	-8.735	-11.4	-13.665	-15.494	-16.858	-17.73	-18.086	-17.908	-17.179	-15.884	-14.013	-11.554	-8.501	-4.845	-0.582	4.294	9.788	15.901	22.639	30.003	37.995	46.617	55.872
1-ethoxyheptane	1969-43-3		-285.618	-273.89	-261.585	-248.708	-235.268	-221.276	-206.745	-191.688	-176.127	-160.088	-143.606	-126.735	-109.556	-92.202	-74.889	-57.969	-41.992	-27.737	-16.109	-7.85	-3.157	-1.554	-2.163	-5.2	-8.457	-11.291	-13.67	-15.567	-16.958	-17.823	-18.143	-17.905	-17.096	-15.705	-13.725	-11.146	-7.965	-4.174	0.229	5.248	10.887	17.148	24.034	31.546	39.686	48.455	57.855
1-ethyl-1-methylcyclopentane	16747-50-5		267.587	248.777	230.608	213.081	196.196	179.952	164.348	149.385	135.062	121.379	108.336	95.933	84.169	73.045	62.559	52.712	43.504	34.934	27.003	19.71	13.055	7.038	1.659	-3.082	-7.185	-10.651	-13.479	-15.67	-17.222	-18.138	-18.415	-18.056	-17.058	-15.423	-13.15	-10.239	-6.69	-2.503	2.322	7.785	13.886	20.627	28.005	36.023	44.68	53.976	63.911
1-ethyl-2,3-dimethylbenzene	933-98-2		198.524	183.959	169.958	156.514	143.619	131.268	119.452	108.164	97.396	87.141	77.39	68.136	59.372	51.091	43.287	35.954	29.087	22.682	16.737	11.249	6.219	1.646	-2.467	-6.119	-9.306	-12.022	-14.264	-16.025	-17.3	-18.08	-18.361	-18.134	-17.393	-16.131	-14.341	-12.017	-9.153	-5.742	-1.78	2.74	7.821	13.469	19.688	26.482	33.855	41.81	50.35
1-ethyl-2,4-dimethylbenzene	874-41-9		201.558	186.828	172.662	159.054	145.996	133.483	121.507	110.061	99.137	88.73	78.83	69.432	60.528	52.112	44.179	36.724	29.742	23.23	17.186	11.608	6.496	1.85	-2.327	-6.033	-9.265	-12.018	-14.287	-16.067	-17.352	-18.136	-18.411	-18.172	-17.413	-16.126	-14.305	-11.944	-9.038	-5.58	-1.566	3.01	8.152	13.866	20.154	27.021	34.47	42.505	51.129
1-ethyl-2,4,5-trimethylbenzene	17851-27-3		202.682	188.026	173.921	160.362	147.34	134.849	122.883	111.433	100.492	90.055	80.113	70.661	61.694	53.205	45.191	37.649	30.575	23.968	17.828	12.155	6.95	2.217	-2.043	-5.826	-9.127	-11.939	-14.256	-16.073	-17.383	-18.181	-18.459	-18.211	-17.431	-16.113	-14.251	-11.839	-8.873	-5.347	-1.256	3.404	8.638	14.449	20.841	27.817	35.38	43.534	52.282
1-ethyl-3,5-dimethylbenzene	934-74-7		203.526	188.707	174.45	160.75	147.6	134.993	122.924	111.383	100.365	89.863	79.869	70.377	61.381	52.875	44.854	37.313	30.249	23.659	17.541	11.895	6.72	2.018	-2.208	-5.957	-9.225	-12.006	-14.296	-16.09	-17.381	-18.164	-18.431	-18.178	-17.397	-16.082	-14.227	-11.827	-8.876	-5.368	-1.299	3.337	8.543	14.325	20.685	27.629	35.158	43.276	51.986
1-ethyl-4-(1-methylethyl)benzene	4218-48-8		209.537	194.397	179.817	165.792	152.317	139.385	126.991	115.129	103.793	92.979	82.68	72.892	63.61	54.83	46.549	38.764	31.473	24.673	18.365	12.548	7.223	2.39	-1.947	-5.787	-9.127	-11.962	-14.29	-16.106	-17.406	-18.185	-18.439	-18.163	-17.352	-16.002	-14.108	-11.666	-8.672	-5.122	-1.012	3.661	8.902	14.713	21.096	28.056	35.595	43.715	52.418
1-ethyl-4-methylbenzene	622-96-8		202.602	187.695	173.361	159.594	146.389	133.739	121.639	110.081	99.058	88.564	78.592	69.135	60.186	51.738	43.786	36.324	29.347	22.85	16.83	11.283	6.209	1.605	-2.528	-6.188	-9.376	-12.086	-14.318	-16.065	-17.324	-18.089	-18.355	-18.116	-17.367	-16.1	-14.311	-11.993	-9.14	-5.747	-1.808	2.682	7.728	13.334	19.505	26.246	33.559	41.449	49.919
1-ethylcyclohexene	1453-24-3		199.237	186.745	174.577	162.717	151.152	139.872	128.874	118.156	107.721	97.578	87.739	78.218	69.032	60.201	51.746	43.685	36.041	28.833	22.079	15.799	10.007	4.72	-0.049	-4.348	-8.108	-11.295	-13.907	-15.937	-17.383	-18.239	-18.504	-18.172	-17.241	-15.708	-13.569	-10.823	-7.467	-3.498	1.086	6.286	12.105	18.543	25.603	33.286	41.593	50.525	60.084
1-ethylcyclopentene	2146-38-5		186.383	175.216	164.339	153.722	143.337	133.162	123.18	113.382	103.768	94.343	85.121	76.122	67.371	58.897	50.728	42.897	35.432	28.363	21.716	15.517	9.786	4.543	-0.193	-4.473	-8.218	-11.394	-13.996	-16.019	-17.46	-18.315	-18.579	-18.249	-17.321	-15.794	-13.663	-10.927	-7.582	-3.627	0.941	6.124	11.924	18.341	25.379	33.037	41.318	50.223	59.753
1-ethylnaphthalene	1127-76-0		206.052	190.622	175.788	161.545	147.889	134.818	122.326	110.409	99.063	88.283	78.063	68.397	59.28	50.706	42.667	35.159	28.173	21.703	15.743	10.286	5.325	0.854	-3.133	-6.641	-9.674	-12.237	-14.334	-15.966	-17.135	-17.842	-18.086	-17.867	-17.183	-16.03	-14.406	-12.305	-9.724	-6.657	-3.098	0.958	5.516	10.583	16.165	22.268	28.898	36.062	43.763
1-fluoronaphthalene	321-38-0		212.4	196.389	180.986	166.192	152.002	138.416	125.431	113.043	101.251	90.052	79.44	69.413	59.967	51.096	42.796	35.061	27.886	21.263	15.186	9.647	4.639	0.154	-3.818	-7.284	-10.255	-12.738	-14.744	-16.28	-17.355	-17.976	-18.151	-17.885	-17.183	-16.047	-14.48	-12.483	-10.054	-7.19	-3.888	-0.143	4.008	8.597	13.641	19.147	25.124	31.581	38.525
1-fluoro-4-(trifluoromethyl)benzene	402-44-8		229.466	212.396	195.957	180.148	164.968	150.415	136.487	123.184	110.503	98.443	87	76.174	65.96	56.357	47.36	38.967	31.172	23.972	17.362	11.335	5.886	1.008	-3.307	-7.067	-10.281	-12.958	-15.111	-16.749	-17.884	-18.529	-18.697	-18.4	-17.651	-16.462	-14.845	-12.809	-10.364	-7.516	-4.272	-0.632	2.995	6.833	10.957	15.372	20.084	25.105	30.449
1-fluoroheptane	661-11-0		125.729	115.811	106.447	97.621	89.315	81.508	74.176	67.291	60.824	54.74	49.005	43.58	38.43	33.518	28.812	24.284	19.915	15.693	11.618	7.698	3.948	0.395	-2.931	-6.334	-9.452	-12.123	-14.335	-16.075	-17.331	-18.091	-18.344	-18.079	-17.285	-15.955	-14.08	-11.652	-8.666	-5.114	-0.993	3.703	8.977	14.832	21.273	28.3	35.917	44.125	52.926
1-fluorodecane	334-56-5		135.607	125.683	116.282	107.386	98.97	91.01	83.476	76.335	69.553	63.095	56.923	51	45.295	39.78	34.432	29.238	24.195	19.308	14.593	10.073	5.776	1.735	-2.013	-5.695	-9.02	-11.858	-14.198	-16.029	-17.341	-18.124	-18.368	-18.066	-17.21	-15.794	-13.812	-11.258	-8.128	-4.418	-0.126	4.753	10.22	16.278	22.927	30.169	38.006	46.439	55.467
1-fluorohexane	373-14-8		123.152	113.12	103.654	94.74	86.362	78.501	71.136	64.242	57.791	51.753	46.094	40.779	35.77	31.029	26.523	22.219	18.091	14.121	10.299	6.626	3.111	-0.228	-3.365	-6.637	-9.655	-12.246	-14.397	-16.095	-17.326	-18.078	-18.336	-18.089	-17.326	-16.035	-14.206	-11.832	-8.903	-5.413	-1.355	3.277	8.487	14.279	20.658	27.626	35.187	43.344	52.097
1-heptanethiol	1639-09-4		43.649	40.123	37.087	34.516	32.376	30.626	29.216	28.086	27.165	26.369	25.603	24.769	23.765	22.501	20.903	18.93	16.573	13.86	10.853	7.635	4.304	0.961	-2.298	-5.728	-8.881	-11.584	-13.824	-15.592	-16.875	-17.664	-17.95	-17.724	-16.98	-15.711	-13.911	-11.576	-8.703	-5.288	-1.33	3.172	8.076	13.442	19.283	25.584	32.326	39.49	47.054
1-heptanol	111-70-6		-289.196	-276.262	-262.771	-248.735	-234.168	-219.088	-203.512	-187.466	-170.978	-154.087	-136.844	-119.321	-101.625	-83.926	-66.493	-49.744	-34.303	-20.98	-10.608	-3.709	-0.209	0.537	-0.584	-3.693	-6.931	-9.756	-12.136	-14.043	-15.455	-16.354	-16.723	-16.551	-15.829	-14.548	-12.706	-10.297	-7.321	-3.779	0.328	4.997	9.679	14.348	18.783	22.528	24.954	25.317	22.93
1-heptene	592-76-7		208.26	194.168	180.526	167.326	154.563	142.229	130.321	118.836	107.773	97.131	86.911	77.116	67.752	58.822	50.334	42.295	34.714	27.599	20.96	14.806	9.146	3.99	-0.653	-4.818	-8.454	-11.54	-14.068	-16.036	-17.437	-18.268	-18.525	-18.203	-17.298	-15.807	-13.727	-11.054	-7.785	-3.918	0.55	5.62	11.296	17.58	24.472	31.975	40.09	48.819	58.163
1-heptanamine	111-68-2		-812.963	-776.416	-739.256	-701.49	-663.129	-624.186	-584.676	-544.621	-504.043	-462.975	-421.455	-379.533	-337.271	-294.753	-252.088	-209.441	-167.083	-125.545	-85.999	-50.932	-24.32	-9.044	-3.445	-5.152	-7.937	-10.474	-12.688	-14.517	-15.915	-16.845	-17.279	-17.198	-16.586	-15.433	-13.734	-11.483	-8.68	-5.324	-1.416	3.04	7.879	13.17	18.925	25.127	31.756	38.793	46.218
1-hexanethiol	111-31-9		39.954	36.313	33.175	30.515	28.303	26.502	25.067	23.943	23.065	22.353	21.722	21.074	20.311	19.337	18.074	16.464	14.485	12.146	9.494	6.601	3.555	0.455	-2.604	-5.91	-8.974	-11.605	-13.793	-15.525	-16.789	-17.574	-17.871	-17.669	-16.961	-15.74	-13.999	-11.733	-8.936	-5.606	-1.74	2.664	7.452	12.69	18.395	24.551	31.14	38.143	45.538
1-heptyne	628-71-7		182.89	169.253	156.169	143.631	131.629	120.156	109.201	98.755	88.807	79.347	70.364	61.849	53.791	46.182	39.012	32.275	25.963	20.073	14.6	9.544	4.904	0.681	-3.121	-6.57	-9.596	-12.166	-14.277	-15.924	-17.103	-17.809	-18.038	-17.785	-17.048	-15.823	-14.107	-11.9	-9.199	-6.006	-2.322	1.851	6.072	10.485	15.105	19.865	24.694	29.518	34.27
1-hydroxy-2-propanone	116-09-6		-266.835	-255.694	-244.107	-232.082	-219.629	-206.761	-193.494	-179.852	-165.861	-151.557	-136.986	-122.208	-107.304	-92.381	-77.587	-63.121	-49.253	-36.329	-24.767	-14.997	-7.375	-2.07	1.006	0.048	-1.983	-4.031	-6.066	-8.046	-9.923	-11.643	-13.155	-14.406	-15.348	-15.938	-16.138	-15.913	-15.235	-14.079	-12.423	-10.251	-7.852	-5.099	-1.985	1.409	4.951	8.431	11.525
1-hexyn-3-ol	105-31-7		-162.767	-154.622	-145.933	-136.718	-126.997	-116.799	-106.158	-95.125	-83.765	-72.174	-60.487	-48.894	-37.662	-27.138	-17.74	-9.902	-3.974	-0.105	1.806	2.079	1.139	-0.589	-2.747	-5.549	-8.209	-10.476	-12.345	-13.811	-14.87	-15.517	-15.749	-15.565	-14.964	-13.945	-12.51	-10.662	-8.404	-5.741	-2.677	0.779	3.081	4.361	4.325	2.312	-2.332	-10.045	-20.855
1-isocyanatobutane	111-36-4		139.585	128.615	118.213	108.363	99.053	90.264	81.977	74.172	66.825	59.91	53.399	47.264	41.476	36.006	30.826	25.912	21.243	16.804	12.586	8.586	4.807	1.261	-2.037	-5.254	-8.186	-10.739	-12.898	-14.648	-15.971	-16.854	-17.282	-17.239	-16.713	-15.691	-14.163	-12.118	-9.547	-6.441	-2.794	1.402	6.151	11.459	17.332	23.772	30.784	38.371	46.536
1-iodopentane	628-17-1		207.574	192.374	177.753	163.707	150.231	137.319	124.965	113.163	101.908	91.192	81.01	71.354	62.22	53.6	45.489	37.882	30.772	24.157	18.03	12.39	7.233	2.557	-1.639	-5.354	-8.59	-11.345	-13.616	-15.403	-16.701	-17.508	-17.82	-17.633	-16.942	-15.744	-14.034	-11.808	-9.061	-5.79	-1.99	2.343	7.198	12.586	18.513	24.982	31.995	39.554	47.662
1-iodopropane	107-08-4		200.477	185.478	171.073	157.256	144.024	131.371	119.291	107.778	96.826	86.428	76.577	67.265	58.483	50.225	42.481	35.242	28.501	22.248	16.476	11.176	6.343	1.968	-1.953	-5.425	-8.451	-11.034	-13.175	-14.874	-16.129	-16.938	-17.297	-17.203	-16.649	-15.631	-14.141	-12.173	-9.719	-6.774	-3.33	0.621	5.064	10.019	15.496	21.499	28.034	35.106	42.72
1-iodobutane	542-69-8		204.327	189.223	174.706	160.769	147.41	134.621	122.397	110.733	99.62	89.053	79.025	69.529	60.557	52.102	44.157	36.714	29.768	23.312	17.34	11.846	6.827	2.279	-1.802	-5.417	-8.566	-11.251	-13.471	-15.222	-16.504	-17.312	-17.643	-17.493	-16.855	-15.727	-14.101	-11.973	-9.338	-6.19	-2.523	1.666	6.369	11.599	17.362	23.662	30.502	37.886	45.817
1-iodo-hexane	637-45-9		210.61	195.304	180.572	166.41	152.813	139.774	127.288	115.35	103.954	93.094	82.764	72.96	63.675	54.905	46.645	38.89	31.637	24.883	18.624	12.859	7.587	2.806	-1.484	-5.282	-8.587	-11.397	-13.71	-15.524	-16.836	-17.641	-17.938	-17.722	-16.99	-15.737	-13.961	-11.657	-8.823	-5.454	-1.549	2.898	7.874	13.391	19.451	26.059	33.214	40.919	49.175
1-isopropyl-4-methylcyclohexane	99-82-1		268.214	249.387	231.2	213.653	196.747	180.482	164.856	149.871	135.525	121.819	108.753	96.327	84.54	73.392	62.884	53.015	43.785	35.194	27.242	19.93	13.256	7.222	1.826	-2.931	-7.049	-10.528	-13.368	-15.57	-17.132	-18.056	-18.34	-17.986	-16.992	-15.36	-13.089	-10.178	-6.628	-2.439	2.39	7.858	13.965	20.712	28.099	36.125	44.791	54.098	64.044
1-methoxy-2-acetoxypropane	108-65-6		-192.019	-185.461	-178.423	-170.912	-162.941	-154.521	-145.667	-136.396	-126.727	-116.687	-106.308	-95.635	-84.73	-73.679	-62.605	-51.68	-41.14	-31.291	-22.495	-15.124	-9.478	-5.693	-3.687	-5.075	-7.277	-9.349	-11.253	-12.946	-14.386	-15.53	-16.335	-16.764	-16.783	-16.361	-15.471	-14.09	-12.198	-9.777	-6.814	-3.296	0.785	5.438	10.673	16.495	22.909	29.921	37.534
1-methoxy-2-methylbenzene	578-58-5		102.478	96.462	90.712	85.184	79.835	74.62	69.498	64.435	59.4	54.376	49.353	44.334	39.33	34.364	29.462	24.657	19.982	15.472	11.159	7.073	3.242	-0.311	-3.562	-6.697	-9.498	-11.88	-13.845	-15.394	-16.527	-17.241	-17.531	-17.394	-16.823	-15.81	-14.347	-12.425	-10.036	-7.169	-3.815	0.036	4.386	9.249	14.634	20.55	27.004	34.003	41.555
1-methoxy-1,3-butadiene	3036-66-6		27.949	25.407	23.339	21.708	20.465	19.557	18.918	18.472	18.138	17.826	17.447	16.917	16.163	15.134	13.8	12.16	10.239	8.08	5.743	3.292	0.796	-1.682	-4.085	-6.75	-9.232	-11.362	-13.141	-14.573	-15.656	-16.384	-16.752	-16.75	-16.367	-15.592	-14.409	-12.805	-10.764	-8.271	-5.313	-1.873	2.024	6.414	11.315	16.737	22.69	29.183	36.223
1-methoxy2-propanol	107-98-2		-317.434	-304.685	-291.411	-277.619	-263.319	-248.521	-233.239	-217.49	-201.297	-184.685	-167.691	-150.364	-132.771	-115.009	-97.223	-79.633	-62.571	-46.522	-32.132	-20.134	-11.134	-5.349	-2.487	-3.974	-6.408	-8.673	-10.723	-12.512	-13.996	-15.131	-15.88	-16.21	-16.089	-15.493	-14.399	-12.788	-10.646	-7.959	-4.715	-0.907	3.188	7.617	12.327	17.161	21.875	26.119	29.408
1-methoxynaphthalene	2216-69-5		177.124	164.373	152.005	140.028	128.451	117.283	106.535	96.214	86.332	76.895	67.91	59.383	51.319	43.721	36.589	29.924	23.724	17.987	12.709	7.884	3.507	-0.43	-3.932	-7.072	-9.799	-12.094	-13.966	-15.422	-16.467	-17.105	-17.339	-17.169	-16.593	-15.608	-14.208	-12.387	-10.136	-7.447	-4.309	-0.712	3.346	7.881	12.907	18.432	24.468	31.023	38.108
1-methyl-1h-pyrrole	96-54-8		63.671	57.006	50.864	45.228	40.08	35.399	31.161	27.338	23.9	20.815	18.044	15.549	13.287	11.216	9.291	7.471	5.718	3.998	2.285	0.563	-1.176	-2.928	-4.68	-6.926	-9.125	-11.052	-12.707	-14.084	-15.176	-15.968	-16.446	-16.591	-16.385	-15.807	-14.836	-13.452	-11.636	-9.369	-6.634	-3.414	0.255	4.416	9.09	14.288	20.018	26.289	33.107
1-methyl-2-isopropylbenzene	527-84-4		202.976	188.074	173.743	159.977	146.771	134.118	122.011	110.445	99.412	88.905	78.917	69.442	60.474	52.005	44.031	36.545	29.544	23.023	16.979	11.409	6.313	1.689	-2.462	-6.139	-9.34	-12.062	-14.301	-16.054	-17.316	-18.081	-18.345	-18.102	-17.345	-16.071	-14.271	-11.942	-9.078	-5.672	-1.721	2.781	7.838	13.456	19.637	26.386	33.707	41.603	50.077
1-methyl-2-ethylbenzene	611-14-3		199.044	184.307	170.145	156.551	143.52	131.045	119.119	107.736	96.888	86.568	76.768	67.481	58.698	50.413	42.619	35.309	28.476	22.116	16.224	10.797	5.83	1.324	-2.723	-6.31	-9.437	-12.099	-14.294	-16.017	-17.264	-18.029	-18.306	-18.088	-17.369	-16.141	-14.4	-12.137	-9.346	-6.02	-2.155	2.257	7.22	12.74	18.823	25.471	32.691	40.485	48.858
1-methyl-3-(1-methylethyl)-benzene	535-77-3		205.384	190.396	175.975	162.116	148.812	136.058	123.847	112.172	101.029	90.409	80.308	70.718	61.635	53.052	44.964	37.368	30.259	23.635	17.493	11.831	6.649	1.947	-2.274	-6.013	-9.266	-12.032	-14.306	-16.084	-17.362	-18.134	-18.396	-18.143	-17.369	-16.068	-14.237	-11.868	-8.958	-5.502	-1.494	3.069	8.191	13.878	20.132	26.958	34.357	42.335	50.893
1-methyl-2-propylbenzene	1074-17-5		202.654	187.795	173.505	159.776	146.604	133.982	121.904	110.362	99.351	88.863	78.892	69.43	60.472	52.012	44.043	36.561	29.562	23.041	16.995	11.423	6.324	1.696	-2.459	-6.141	-9.345	-12.071	-14.313	-16.068	-17.331	-18.097	-18.36	-18.115	-17.356	-16.077	-14.272	-11.937	-9.065	-5.652	-1.692	2.82	7.888	13.516	19.708	26.469	33.801	41.709	50.194
1-methyl-3-ethylcyclopentane	3726-47-4		268.991	250.103	231.858	214.256	197.297	180.98	165.306	150.274	135.884	122.137	109.032	96.568	84.747	73.567	63.029	53.132	43.877	35.263	27.291	19.961	13.271	7.223	1.816	-2.95	-7.074	-10.557	-13.399	-15.6	-17.159	-18.077	-18.354	-17.989	-16.983	-15.335	-13.046	-10.115	-6.542	-2.328	2.528	8.026	14.166	20.948	28.373	36.44	45.149	54.501	64.495
1-methyl-3-propyl-benzene	1074-43-7		205.025	190.073	175.686	161.859	148.585	135.859	123.674	112.024	100.903	90.303	80.22	70.646	61.576	53.005	44.928	37.34	30.237	23.618	17.479	11.82	6.639	1.937	-2.284	-6.023	-9.276	-12.042	-14.315	-16.092	-17.368	-18.137	-18.395	-18.136	-17.354	-16.044	-14.201	-11.82	-8.895	-5.421	-1.395	3.189	8.335	14.047	20.328	27.183	34.614	42.624	51.217
1-methyl-4-(1-methylethenyl)benzene	1195-32-0		203.698	188.494	173.88	159.851	146.404	133.533	121.234	109.5	98.327	87.708	77.637	68.107	59.113	50.646	42.7	35.267	28.342	21.917	15.985	10.542	5.58	1.096	-2.915	-6.458	-9.535	-12.145	-14.291	-15.971	-17.184	-17.928	-18.2	-17.997	-17.313	-16.144	-14.484	-12.328	-9.669	-6.5	-2.817	1.389	6.122	11.39	17.197	23.551	30.455	37.916	45.938
1-methyl-4-(1-methylethyl)-1,4-cyclohexadiene	99-85-4		211.843	197.005	182.674	168.846	155.517	142.683	130.342	118.49	107.124	96.243	85.844	75.926	66.489	57.533	49.059	41.067	33.559	26.539	20.01	13.975	8.438	3.404	-1.122	-5.165	-8.692	-11.687	-14.145	-16.062	-17.434	-18.256	-18.523	-18.232	-17.377	-15.955	-13.961	-11.392	-8.244	-4.513	-0.196	4.71	10.209	16.303	22.994	30.287	38.182	46.682	55.789
1-methyl-4-propylbenzene	1074-55-1		205.639	190.644	176.216	162.348	149.035	136.27	124.049	112.363	101.208	90.576	80.462	70.859	61.762	53.165	45.064	37.454	30.332	23.695	17.541	11.867	6.675	1.963	-2.266	-6.012	-9.271	-12.04	-14.316	-16.094	-17.37	-18.138	-18.395	-18.133	-17.349	-16.037	-14.191	-11.806	-8.878	-5.402	-1.373	3.213	8.361	14.074	20.356	27.21	34.64	42.649	51.239
1-methyl-pyrrolidine	120-94-5		-710.712	-680.066	-648.816	-616.97	-584.533	-551.513	-517.918	-483.759	-449.049	-413.805	-378.05	-341.811	-305.127	-268.053	-230.671	-193.113	-155.623	-118.69	-83.359	-51.719	-27.003	-11.8	-5.365	-6.714	-9.344	-11.74	-13.832	-15.56	-16.872	-17.726	-18.086	-17.926	-17.222	-15.957	-14.115	-11.687	-8.663	-5.035	-0.798	4.052	9.52	15.609	22.32	29.656	37.619	46.21	55.429
1-methylcyclohexene	591-49-1		193.473	180.813	168.566	156.714	145.238	134.124	123.358	112.929	102.83	93.057	83.611	74.494	65.714	57.281	49.207	41.507	34.198	27.295	20.818	14.783	9.207	4.107	-0.503	-4.686	-8.353	-11.465	-14.016	-16.001	-17.415	-18.254	-18.512	-18.185	-17.269	-15.761	-13.656	-10.952	-7.646	-3.733	0.787	5.918	11.661	18.019	24.994	32.587	40.8	49.635	59.092
1-methylimidazol	616-47-7		-586.747	-560.357	-533.42	-505.945	-477.941	-449.421	-420.399	-390.893	-360.926	-330.526	-299.728	-268.583	-237.155	-205.541	-173.884	-142.422	-111.562	-82.021	-55.012	-32.269	-15.509	-5.306	-0.598	-1.469	-3.517	-5.582	-7.612	-9.557	-11.364	-12.986	-14.375	-15.49	-16.291	-16.743	-16.816	-16.481	-15.716	-14.497	-12.806	-10.627	-8.173	-5.293	-1.933	1.914	6.253	11.089	16.425
1-methylcyclopentene	693-89-0		190.14	178.054	166.319	154.915	143.825	133.035	122.534	112.318	102.382	92.73	83.367	74.305	65.556	57.137	49.066	41.362	34.045	27.134	20.65	14.609	9.031	3.931	-0.676	-4.843	-8.491	-11.586	-14.123	-16.097	-17.504	-18.337	-18.594	-18.27	-17.361	-15.864	-13.774	-11.09	-7.807	-3.923	0.565	5.659	11.362	17.674	24.6	32.139	40.294	49.066	58.457
1-methylnaphthalene	90-12-0		201.8	186.524	171.846	157.762	144.27	131.366	119.044	107.302	96.135	85.536	75.5	66.023	57.096	48.713	40.867	33.551	26.756	20.475	14.698	9.419	4.628	0.317	-3.521	-6.894	-9.807	-12.268	-14.281	-15.849	-16.975	-17.661	-17.906	-17.71	-17.07	-15.982	-14.441	-12.443	-9.981	-7.047	-3.634	0.265	4.658	9.554	14.96	20.884	27.334	34.318	41.84
1-methylpiperazine	109-01-3		-731.116	-697.574	-663.498	-628.906	-593.823	-558.276	-522.297	-485.924	-449.202	-412.181	-374.922	-337.492	-299.972	-262.456	-225.065	-187.962	-151.403	-115.851	-82.21	-52.159	-28.196	-12.449	-4.717	-5.392	-7.685	-9.857	-11.839	-13.566	-14.98	-16.033	-16.682	-16.894	-16.639	-15.895	-14.645	-12.873	-10.569	-7.724	-4.332	-0.389	3.976	8.823	14.166	19.993	26.29	33.037	40.218
1-n-butylnaphthalene	1634-09-0		211.16	195.561	180.551	166.125	152.28	139.013	126.318	114.193	102.631	91.63	81.183	71.287	61.936	53.126	44.85	37.104	29.884	23.184	16.999	11.326	6.159	1.495	-2.669	-6.337	-9.511	-12.193	-14.385	-16.088	-17.301	-18.026	-18.261	-18.005	-17.257	-16.013	-14.272	-12.03	-9.285	-6.033	-2.269	2.009	6.807	12.127	17.975	24.354	31.269	38.724	46.722
1-nonanethiol	1455-21-6		48.127	44.742	41.836	39.377	37.331	35.653	34.287	33.168	32.214	31.335	30.429	29.388	28.111	26.507	24.514	22.103	19.286	16.113	12.663	9.038	5.343	1.687	-1.835	-5.435	-8.713	-11.517	-13.835	-15.656	-16.97	-17.768	-18.043	-17.787	-16.995	-15.661	-13.78	-11.35	-8.368	-4.831	-0.74	3.908	8.99	14.554	20.612	27.148	34.144	41.581	49.436
1-nonanol	143-08-8		-283.131	-270.178	-256.671	-242.624	-228.048	-212.963	-197.386	-181.341	-164.86	-147.98	-130.755	-113.262	-95.618	-78.011	-60.74	-44.274	-29.299	-16.673	-7.213	-1.324	1.236	1.232	-0.418	-3.743	-7.096	-10.004	-12.438	-14.375	-15.795	-16.683	-17.024	-16.81	-16.033	-14.686	-12.766	-10.272	-7.201	-3.556	0.662	5.449	10.299	15.178	19.867	23.913	26.682	27.401	25.333
1-nonanamine	112-20-9		-808.796	-772.137	-734.874	-697.014	-658.57	-619.554	-579.984	-539.879	-499.265	-458.173	-416.642	-374.722	-332.477	-289.988	-247.365	-204.774	-162.493	-121.084	-81.806	-47.335	-21.792	-7.77	-3.107	-5.12	-8.041	-10.67	-12.938	-14.79	-16.184	-17.087	-17.476	-17.333	-16.644	-15.403	-13.603	-11.241	-8.316	-4.829	-0.781	3.823	8.839	14.324	20.286	26.707	33.568	40.847	48.521
1-octanethiol	111-88-6		44.443	41.123	38.284	35.898	33.929	32.336	31.065	30.054	29.225	28.49	27.751	26.901	25.837	24.467	22.721	20.564	17.998	15.063	11.833	8.403	4.879	1.365	-2.039	-5.563	-8.786	-11.545	-13.828	-15.625	-16.925	-17.719	-17.998	-17.756	-16.985	-15.68	-13.837	-11.451	-8.52	-5.041	-1.013	3.564	8.551	14.004	19.936	26.329	33.165	40.422	48.076
1-nonyne	3452-09-03		189.689	175.943	162.727	150.033	137.852	126.174	114.99	104.292	94.069	84.312	75.014	66.166	57.762	49.797	42.265	35.164	28.491	22.248	16.435	11.054	6.11	1.608	-2.447	-6.104	-9.306	-12.022	-14.25	-15.983	-17.218	-17.951	-18.177	-17.893	-17.097	-15.786	-13.96	-11.618	-8.76	-5.389	-1.507	2.883	7.401	12.159	17.165	22.349	27.636	32.945	38.201
1-octanamine	111-86-4		-808.058	-771.398	-734.149	-696.322	-657.927	-618.98	-579.498	-539.502	-499.018	-458.078	-416.722	-374.999	-332.973	-290.723	-248.358	-206.036	-164.025	-122.86	-83.733	-49.181	-23.193	-8.516	-3.326	-5.164	-8.009	-10.586	-12.823	-14.661	-16.055	-16.97	-17.381	-17.267	-16.616	-15.418	-13.667	-11.359	-8.493	-5.069	-1.09	3.443	8.376	13.769	19.635	25.956	32.71	39.88	47.442
1-pentanethiol	110-66-7		35.25	31.725	28.696	26.14	24.03	22.329	20.997	19.982	19.224	18.65	18.179	17.72	17.177	16.458	15.481	14.184	12.533	10.526	8.196	5.605	2.832	-0.031	-2.889	-6.068	-9.039	-11.596	-13.728	-15.422	-16.667	-17.451	-17.763	-17.593	-16.932	-15.77	-14.102	-11.92	-9.219	-5.995	-2.243	2.039	6.681	11.759	17.292	23.267	29.666	36.471	43.661
1-octen-3-ol	3391-86-4		-238.94	-227.999	-216.501	-204.461	-191.893	-178.817	-165.254	-151.234	-136.792	-121.977	-106.856	-91.528	-76.141	-60.924	-46.219	-32.523	-20.478	-10.773	-3.922	-0.032	1.263	0.627	-1.228	-4.45	-7.651	-10.417	-12.726	-14.562	-15.909	-16.754	-17.087	-16.898	-16.18	-14.927	-13.136	-10.803	-7.926	-4.507	-0.544	3.96	8.395	12.741	16.759	19.956	21.66	21.101	17.622
1-pentadecene	13360-61-7		226.971	211.877	197.209	182.966	169.147	155.756	142.794	130.268	118.183	106.547	95.369	84.658	74.423	64.674	55.422	46.677	38.447	30.742	23.572	16.943	10.866	5.345	0.389	-4.019	-7.852	-11.097	-13.751	-15.81	-17.272	-18.133	-18.393	-18.047	-17.095	-15.535	-13.364	-10.581	-7.185	-3.175	1.452	6.695	12.556	19.036	26.136	33.855	42.196	51.157	60.741
1-pentylcyclopentene	4291-98-9		200.227	188.745	177.426	166.247	155.189	144.249	133.43	122.748	112.224	101.891	91.782	81.935	72.389	63.181	54.347	45.918	37.925	30.394	23.346	16.804	10.782	5.297	0.36	-4.057	-7.905	-11.163	-13.828	-15.896	-17.365	-18.231	-18.494	-18.149	-17.195	-15.63	-13.452	-10.659	-7.25	-3.223	1.424	6.691	12.58	19.092	26.227	33.988	42.375	51.388	61.029
1-phenyl-1-pentanone	1009-14-9		-178.612	-171.107	-163.117	-154.659	-145.755	-136.428	-126.705	-116.615	-106.197	-95.497	-84.575	-73.514	-62.431	-51.491	-40.922	-31.025	-22.166	-14.732	-9.044	-5.259	-3.307	-2.914	-3.688	-6.172	-8.844	-11.198	-13.207	-14.849	-16.102	-16.947	-17.366	-17.345	-16.871	-15.932	-14.518	-12.62	-10.232	-7.345	-3.955	-0.055	4.342	9.252	14.681	20.633	27.112	34.122	41.666
1-phenyl-2-propanone	103-79-7		-204.915	-196.485	-187.578	-178.207	-168.386	-158.134	-147.469	-136.418	-125.012	-113.295	-101.323	-89.173	-76.957	-64.827	-52.996	-41.745	-31.422	-22.413	-15.071	-9.624	-6.097	-4.305	-3.913	-5.658	-7.802	-9.762	-11.517	-13.042	-14.312	-15.3	-15.98	-16.326	-16.312	-15.916	-15.115	-13.889	-12.218	-10.086	-7.477	-4.378	-0.784	3.322	7.951	13.113	18.817	25.069	31.877
1-phenylcyclohexene	771-98-2		203.17	188.142	173.69	159.81	146.496	133.743	121.546	109.9	98.797	88.233	78.202	68.696	59.71	51.237	43.272	35.809	28.843	22.367	16.378	10.872	5.846	1.296	-2.779	-6.38	-9.507	-12.16	-14.338	-16.038	-17.257	-17.994	-18.243	-18	-17.262	-16.022	-14.277	-12.021	-9.249	-5.955	-2.136	2.214	7.1	12.527	18.497	25.017	32.089	39.717	47.905
1-piperazineethanamine	140-31-8		-823.393	-785.144	-746.498	-707.447	-667.988	-628.124	-587.863	-547.221	-506.218	-464.888	-423.273	-381.428	-339.426	-297.362	-255.363	-213.607	-172.365	-132.112	-93.766	-59.128	-31.132	-12.601	-3.545	-3.927	-6.136	-8.302	-10.339	-12.17	-13.728	-14.957	-15.811	-16.25	-16.247	-15.775	-14.818	-13.36	-11.39	-8.9	-5.884	-2.338	1.542	5.855	10.626	15.845	21.497	27.567	34.041
1-propanethiol	107-03-9		24.958	21.488	18.53	16.064	14.064	12.499	11.333	10.522	10.01	9.737	9.629	9.604	9.576	9.452	9.149	8.592	7.727	6.527	4.996	3.166	1.093	-1.148	-3.475	-6.307	-9.023	-11.379	-13.364	-14.966	-16.174	-16.973	-17.35	-17.292	-16.787	-15.822	-14.386	-12.469	-10.063	-7.158	-3.747	0.175	4.401	9.034	14.104	19.599	25.506	31.809	38.493
1-propoxy-2-propanol	1569-01-3		-319.144	-306.26	-292.839	-278.888	-264.415	-249.429	-233.943	-217.972	-201.536	-184.658	-167.374	-149.728	-131.787	-113.651	-95.475	-77.5	-60.11	-43.87	-29.538	-17.939	-9.68	-4.838	-2.912	-4.877	-7.576	-10.014	-12.147	-13.93	-15.327	-16.301	-16.823	-16.867	-16.412	-15.438	-13.931	-11.877	-9.267	-6.092	-2.345	1.979	6.655	11.718	17.121	22.732	28.34	33.63	38.142
1-piperidinecarboxaldehyde	2591-86-8		-377.537	-362.687	-347.364	-331.584	-315.36	-298.708	-281.644	-264.182	-246.339	-228.13	-209.572	-190.684	-171.49	-152.025	-132.342	-112.534	-92.764	-73.319	-54.688	-37.63	-23.158	-12.267	-5.449	-5.38	-7.086	-8.906	-10.747	-12.512	-14.111	-15.462	-16.495	-17.151	-17.383	-17.151	-16.426	-15.184	-13.405	-11.076	-8.185	-4.723	-0.684	3.937	9.145	14.943	21.333	28.317	35.896
1-piperidinepropanenitrile	3088-41-3		-344.758	-326.84	-308.418	-289.526	-270.208	-250.517	-230.52	-210.304	-189.971	-169.646	-149.479	-129.64	-110.328	-91.767	-74.213	-57.961	-43.35	-30.74	-20.465	-12.733	-7.539	-4.635	-3.587	-5.299	-7.575	-9.675	-11.562	-13.197	-14.543	-15.563	-16.225	-16.498	-16.358	-15.782	-14.75	-13.249	-11.264	-8.786	-5.806	-2.317	1.555	5.883	10.691	15.976	21.735	27.965	34.661
1-tetradecene	1120-36-1		226.507	211.442	196.804	182.589	168.799	155.435	142.501	130	117.94	106.328	95.173	84.483	74.268	64.538	55.303	46.573	38.358	30.666	23.507	16.889	10.821	5.308	0.359	-4.044	-7.873	-11.114	-13.765	-15.823	-17.283	-18.145	-18.405	-18.061	-17.111	-15.553	-13.386	-10.607	-7.215	-3.209	1.412	6.65	12.505	18.978	26.071	33.784	42.117	51.071	60.646
1-undecene	821-95-4		221.744	206.961	192.608	178.68	165.176	152.094	139.438	127.208	115.41	104.05	93.134	82.671	72.669	63.137	54.086	45.524	37.462	29.91	22.875	16.368	10.397	4.97	0.094	-4.251	-8.033	-11.236	-13.856	-15.891	-17.337	-18.19	-18.448	-18.109	-17.169	-15.628	-13.481	-10.728	-7.367	-3.396	1.186	6.382	12.19	18.614	25.655	33.312	41.586	50.48	59.992
1-tridecene	2437-54-1		225.094	210.072	195.483	181.325	167.597	154.3	141.437	129.01	117.026	105.491	94.411	83.796	73.654	63.994	54.825	46.157	38	30.362	23.252	16.678	10.648	5.17	0.251	-4.128	-7.937	-11.163	-13.801	-15.849	-17.303	-18.161	-18.42	-18.077	-17.13	-15.578	-13.418	-10.649	-7.269	-3.276	1.33	6.551	12.389	18.843	25.915	33.606	41.917	50.847	60.398
1-undecanethiol	5332-52-5		58.171	54.581	51.458	48.767	46.47	44.515	42.841	41.374	40.025	38.697	37.282	35.673	33.773	31.505	28.828	25.737	22.268	18.493	14.507	10.417	6.334	2.359	-1.416	-5.166	-8.55	-11.437	-13.818	-15.682	-17.022	-17.829	-18.097	-17.82	-16.993	-15.612	-13.673	-11.173	-8.112	-4.488	-0.3	4.453	9.661	15.367	21.578	28.28	35.455	43.084	51.146
1-undecyne	2243-98-3		195.544	181.652	168.272	155.397	143.018	131.126	119.711	108.767	98.284	88.255	78.675	69.537	60.839	52.577	44.75	37.359	30.404	23.889	17.818	12.196	7.029	2.324	-1.912	-5.723	-9.053	-11.877	-14.19	-15.987	-17.264	-18.018	-18.244	-17.94	-17.105	-15.737	-13.835	-11.401	-8.435	-4.939	-0.918	3.626	8.358	13.372	18.667	24.175	29.82	35.519	41.189
1a,2b,4a-1,2,4-trimethylcyclohexane	7667-60-9		267.352	248.562	230.413	212.905	196.036	179.807	164.218	149.268	134.958	121.287	108.254	95.861	84.106	72.989	62.511	52.671	43.47	34.906	26.98	19.692	13.042	7.029	1.655	-3.083	-7.183	-10.645	-13.47	-15.658	-17.208	-18.12	-18.395	-18.033	-17.033	-15.396	-13.121	-10.208	-6.657	-2.469	2.357	7.822	13.924	20.665	28.044	36.061	44.718	54.013	63.946
1a,2a,4a-1,2,4-trimethylcyclopentane	2613-72-1		268.43	249.569	231.351	213.775	196.842	180.551	164.902	149.895	135.53	121.807	108.724	96.284	84.484	73.325	62.807	52.93	43.694	35.098	27.143	19.828	13.153	7.119	1.725	-3.029	-7.143	-10.617	-13.451	-15.645	-17.199	-18.113	-18.387	-18.021	-17.015	-15.369	-13.082	-10.156	-6.589	-2.382	2.466	7.953	14.082	20.851	28.261	36.311	45.003	54.336	64.31
1a,3a,5b-trimethylcyclohexane	1795-26-2		266.924	248.18	230.074	212.605	195.775	179.582	164.026	149.107	134.825	121.181	108.173	95.801	84.067	72.968	62.507	52.681	43.492	34.939	27.022	19.742	13.098	7.09	1.718	-3.017	-7.116	-10.579	-13.405	-15.595	-17.148	-18.064	-18.344	-17.986	-16.991	-15.36	-13.09	-10.184	-6.639	-2.457	2.363	7.822	13.918	20.654	28.028	36.04	44.692	53.984	63.914
1h-indene	95-13-6		194.204	179.327	165.046	151.359	138.261	125.748	113.816	102.458	91.67	81.445	71.777	62.658	54.081	46.038	38.519	31.517	25.021	19.021	13.509	8.473	3.904	-0.207	-3.869	-7.09	-9.877	-12.237	-14.173	-15.689	-16.786	-17.464	-17.721	-17.555	-16.959	-15.929	-14.457	-12.535	-10.155	-7.306	-3.98	-0.167	4.139	8.951	14.276	20.125	26.505	33.424	40.889
2,2'-(methylimino)bis-ethanol	105-59-9		-382.151	-361.243	-341.131	-321.61	-302.473	-283.538	-264.655	-245.715	-226.643	-207.394	-187.951	-168.322	-148.542	-128.682	-108.864	-89.284	-70.259	-52.277	-36.023	-22.324	-11.915	-5.113	-1.625	-2.852	-5.139	-7.318	-9.336	-11.139	-12.675	-13.897	-14.759	-15.223	-15.255	-14.827	-13.916	-12.5	-10.564	-8.094	-5.081	-1.515	2.326	6.47	10.835	15.212	19.271	22.511	24.245
2,2'-oxybis-butane	6863-58-7		-367.788	-352.351	-336.332	-319.74	-302.582	-284.871	-266.617	-247.836	-228.547	-208.773	-188.542	-167.897	-146.898	-125.642	-104.289	-83.121	-62.628	-43.611	-27.212	-14.671	-6.72	-3.08	-2.644	-5.422	-8.583	-11.353	-13.694	-15.573	-16.962	-17.836	-18.175	-17.963	-17.185	-15.83	-13.888	-11.352	-8.216	-4.473	-0.119	4.848	10.433	16.638	23.465	30.915	38.992	47.695	57.026
2,2'-thiobisethanol	111-48-8		-309.071	-294.196	-278.842	-263.024	-246.764	-230.086	-213.019	-195.6	-177.873	-159.9	-141.757	-123.555	-105.443	-87.635	-70.426	-54.216	-39.498	-26.81	-16.609	-9.121	-4.251	-1.62	-0.711	-2.333	-4.457	-6.414	-8.189	-9.765	-11.12	-12.228	-13.062	-13.595	-13.798	-13.645	-13.111	-12.17	-10.803	-8.989	-6.712	-3.956	-1.219	1.53	4.128	6.187	7.127	6.181	2.513
2,2'-thiobis2-methylpropane	107-47-1		-37.735	-37.919	-37.527	-36.574	-35.079	-33.066	-30.567	-27.624	-24.292	-20.644	-16.773	-12.798	-8.867	-5.155	-1.855	0.839	2.759	3.795	3.916	3.181	1.721	-0.286	-2.645	-5.803	-8.882	-11.554	-13.801	-15.599	-16.931	-17.778	-18.122	-17.949	-17.243	-15.995	-14.191	-11.823	-8.882	-5.361	-1.254	3.445	8.74	14.637	21.137	28.245	35.963	44.294	53.239
2,2,3,3-tetraflouro-1-propanol	76-37-9		-59.043	-55.425	-51.279	-46.635	-41.532	-36.023	-30.181	-24.105	-17.93	-11.835	-6.047	-0.833	3.524	6.77	8.742	9.41	8.889	7.403	5.228	2.642	-0.116	-2.855	-5.435	-8.029	-10.27	-12.043	-13.367	-14.264	-14.758	-14.876	-14.646	-14.096	-13.257	-12.156	-10.819	-9.267	-7.519	-5.584	-3.469	-1.172	-1.502	-4.137	-9.404	-18.029	-30.382	-46.27	-65.03
2,2,3,3-tetramethylhexane	13475-81-5		267.473	248.669	230.507	212.987	196.109	179.872	164.277	149.322	135.007	121.332	108.297	95.901	84.144	73.027	62.547	52.706	43.503	34.938	27.01	19.719	13.066	7.049	1.669	-3.074	-7.18	-10.651	-13.485	-15.683	-17.245	-18.171	-18.461	-18.115	-17.133	-15.515	-13.261	-10.371	-6.845	-2.682	2.116	7.552	13.623	20.332	27.677	35.66	44.279	53.537	63.431
2,2,3,4-tetramethylpentane	1186-53-4		267.448	248.639	230.473	212.95	196.069	179.831	164.234	149.278	134.964	121.289	108.255	95.861	84.106	72.99	62.512	52.674	43.473	34.91	26.984	19.696	13.045	7.03	1.652	-3.089	-7.195	-10.664	-13.498	-15.696	-17.258	-18.184	-18.475	-18.13	-17.15	-15.534	-13.282	-10.395	-6.872	-2.713	2.082	7.513	13.581	20.285	27.626	35.604	44.219	53.471	63.361
2,2,3,3-tetramethylpentane	7154-79-2		267.581	248.762	230.586	213.054	196.164	179.917	164.311	149.347	135.024	121.342	108.3	95.898	84.137	73.014	62.531	52.687	43.481	34.913	26.984	19.692	13.038	7.021	1.641	-3.103	-7.209	-10.679	-13.513	-15.71	-17.271	-18.197	-18.486	-18.139	-17.157	-15.538	-13.284	-10.394	-6.868	-2.706	2.093	7.527	13.597	20.304	27.647	35.627	44.244	53.498	63.389
2,2,3-trimethyl-butane	464-06-2		268.236	249.371	231.151	213.577	196.647	180.362	164.72	149.722	135.367	121.654	108.584	96.155	84.367	73.221	62.715	52.85	43.624	35.038	27.091	19.783	13.114	7.083	1.69	-3.065	-7.182	-10.662	-13.504	-15.709	-17.277	-18.209	-18.503	-18.16	-17.181	-15.564	-13.311	-10.421	-6.894	-2.729	2.072	7.511	13.588	20.302	27.654	35.644	44.273	53.54	63.447
2,2,3-trimethylpentane	564-02-3		268.464	249.587	231.356	213.77	196.828	180.531	164.878	149.868	135.501	121.777	108.695	96.255	84.457	73.301	62.785	52.91	43.676	35.082	27.127	19.812	13.137	7.1	1.703	-3.056	-7.177	-10.659	-13.503	-15.709	-17.277	-18.208	-18.5	-18.155	-17.172	-15.552	-13.294	-10.399	-6.866	-2.695	2.114	7.561	13.646	20.369	27.73	35.73	44.368	53.646	63.562
2,2,4,4,6,6-hexamethylcyclotrisilazane	1009-93-4		-255.801	-243.011	-229.782	-216.121	-202.039	-187.55	-172.67	-157.422	-141.834	-125.943	-109.806	-93.51	-77.196	-61.096	-45.583	-31.213	-18.724	-8.901	-2.282	1.121	1.837	0.674	-1.582	-5.003	-8.309	-11.13	-13.458	-15.285	-16.603	-17.407	-17.692	-17.454	-16.691	-15.399	-13.578	-11.226	-8.344	-4.931	-0.989	3.481	8.237	13.375	18.918	24.839	31.109	37.699	44.578
2,2,4-trimethyl-2-pentene	107-40-4		200.888	188.406	176.234	164.356	152.757	141.428	130.363	119.564	109.037	98.791	88.842	79.208	69.909	60.967	52.405	44.244	36.508	29.217	22.389	16.044	10.196	4.862	0.053	-4.285	-8.077	-11.291	-13.923	-15.971	-17.431	-18.301	-18.578	-18.259	-17.342	-15.825	-13.705	-10.98	-7.649	-3.709	0.842	6.005	11.781	18.173	25.182	32.809	41.055	49.922	59.411
2,2,4,4-tetramethyl-3-pentanone	815-24-7		-162.998	-158.294	-153.039	-147.238	-140.896	-134.02	-126.618	-118.702	-110.287	-101.396	-92.059	-82.326	-72.266	-61.988	-51.649	-41.482	-31.802	-23.009	-15.548	-9.81	-6.014	-4.124	-3.855	-6.096	-8.777	-11.19	-13.289	-15.028	-16.367	-17.272	-17.711	-17.658	-17.089	-15.987	-14.335	-12.12	-9.332	-5.961	-2	2.557	7.715	13.478	19.85	26.834	34.433	42.648	51.481
2,2,4,4-tetramethylpentane	1070-87-7		266.216	247.478	229.381	211.927	195.113	178.94	163.408	148.515	134.261	120.645	107.669	95.329	83.628	72.563	62.134	52.342	43.186	34.665	26.778	19.527	12.91	6.927	1.578	-3.137	-7.219	-10.668	-13.484	-15.667	-17.217	-18.134	-18.418	-18.07	-17.089	-15.475	-13.228	-10.348	-6.835	-2.689	2.091	7.504	13.552	20.233	27.55	35.501	44.087	53.308	63.166
2,2,4-trimethyl-3-hydroxypentylisobutylate	77-68-9		-259.943	-247.367	-234.394	-221.046	-207.343	-193.308	-178.965	-164.341	-149.468	-134.386	-119.146	-103.821	-88.519	-73.4	-58.705	-44.783	-32.102	-21.216	-12.65	-6.715	-3.371	-2.229	-2.712	-5.378	-8.307	-10.88	-13.069	-14.849	-16.194	-17.083	-17.496	-17.416	-16.827	-15.717	-14.073	-11.886	-9.148	-5.851	-1.989	2.443	7.401	12.887	18.885	25.346	32.189	39.27	46.344
2,2,4,6,6-pentamethylheptane	13475-82-6		266.361	247.627	229.532	212.078	195.264	179.089	163.554	148.657	134.398	120.778	107.795	95.449	83.74	72.668	62.232	52.431	43.267	34.737	26.843	19.584	12.959	6.969	1.613	-3.109	-7.196	-10.65	-13.471	-15.657	-17.21	-18.13	-18.416	-18.068	-17.087	-15.471	-13.223	-10.34	-6.823	-2.672	2.113	7.533	13.587	20.277	27.601	35.561	44.157	53.389	63.257
2,2,4-trimethylhexane	16747-26-5		268.53	249.656	231.426	213.841	196.9	180.603	164.949	149.938	135.57	121.845	108.761	96.32	84.52	73.361	62.844	52.967	43.731	35.134	27.178	19.862	13.185	7.148	1.75	-3.009	-7.129	-10.61	-13.453	-15.657	-17.222	-18.149	-18.438	-18.088	-17.1	-15.473	-13.208	-10.304	-6.762	-2.581	2.238	7.697	13.794	20.531	27.907	35.922	44.577	53.872	63.807
2,2,5-trimethylhexane	3522-94-9		267.467	248.66	230.496	212.975	196.096	179.858	164.262	149.307	134.992	121.318	108.284	95.889	84.134	73.018	62.54	52.701	43.5	34.937	27.011	19.723	13.072	7.058	1.681	-3.06	-7.164	-10.632	-13.463	-15.658	-17.217	-18.14	-18.426	-18.076	-17.09	-15.468	-13.209	-10.314	-6.783	-2.614	2.191	7.634	13.714	20.431	27.786	35.779	44.41	53.68	63.589
2,2,5,5-tetramethylhexane	1071-81-4		265.932	247.219	229.146	211.714	194.921	178.768	163.254	148.378	134.14	120.54	107.576	95.249	83.559	72.504	62.085	52.301	43.152	34.637	26.757	19.51	12.897	6.918	1.571	-3.142	-7.222	-10.67	-13.484	-15.666	-17.216	-18.133	-18.417	-18.068	-17.086	-15.472	-13.224	-10.344	-6.829	-2.682	2.1	7.516	13.567	20.252	27.572	35.528	44.12	53.348	63.213
2,2,6-trimethylcyclohexanone	2408-37-9		-220.457	-212.72	-204.431	-195.601	-186.244	-176.374	-166.009	-155.167	-143.871	-132.148	-120.033	-107.573	-94.833	-81.909	-68.946	-56.16	-43.863	-32.484	-22.54	-14.551	-8.879	-5.577	-4.359	-6.265	-8.793	-11.097	-13.126	-14.83	-16.162	-17.084	-17.559	-17.558	-17.056	-16.032	-14.468	-12.349	-9.665	-6.405	-2.562	1.871	6.899	12.527	18.758	25.595	33.042	41.099	49.769
2,2,6-trimethylheptane	1190-83-6		267.729	248.914	230.741	213.21	196.321	180.073	164.466	149.5	135.175	121.49	108.445	96.039	84.273	73.146	62.658	52.808	43.597	35.024	27.089	19.792	13.133	7.111	1.727	-3.02	-7.13	-10.602	-13.438	-15.636	-17.197	-18.122	-18.409	-18.06	-17.073	-15.449	-13.188	-10.289	-6.754	-2.58	2.231	7.68	13.767	20.493	27.857	35.859	44.501	53.781	63.701
2,2-dichlorobutane	4279-22-5		211.895	196.035	180.782	166.133	152.084	138.633	125.776	113.508	101.826	90.725	80.2	70.246	60.857	52.029	43.754	36.027	28.842	22.191	16.069	10.468	5.383	0.805	-3.27	-6.849	-9.937	-12.539	-14.659	-16.301	-17.468	-18.161	-18.381	-18.128	-17.402	-16.199	-14.518	-12.354	-9.704	-6.562	-2.924	1.218	5.869	11.035	16.724	22.941	29.694	36.988	44.831
2,2-diethoxyethanamine	645-36-3		-746.355	-712.712	-678.451	-643.577	-608.099	-572.026	-535.373	-498.155	-460.397	-422.129	-383.391	-344.241	-304.759	-265.061	-225.326	-185.835	-147.057	-109.804	-75.47	-46.177	-24.25	-10.678	-4.174	-4.932	-7.153	-9.276	-11.235	-12.968	-14.418	-15.537	-16.281	-16.613	-16.505	-15.929	-14.866	-13.298	-11.213	-8.598	-5.447	-1.751	2.366	6.969	12.079	17.69	23.791	30.374	37.425
2,2-dichloropropane	594-20-7		208.111	192.2	176.916	162.256	148.217	134.795	121.988	109.791	98.2	87.211	76.817	67.013	57.794	49.151	41.079	33.568	26.611	20.198	14.32	8.967	4.128	-0.206	-4.046	-7.403	-10.286	-12.704	-14.666	-16.18	-17.251	-17.884	-18.082	-17.846	-17.175	-16.067	-14.519	-12.525	-10.078	-7.17	-3.793	0.064	4.409	9.252	14.605	20.476	26.877	33.816	41.302
2,2-diethoxypropane	126-84-1		-292.148	-281.241	-269.744	-257.661	-245.002	-231.777	-217.998	-203.68	-188.843	-173.511	-157.716	-141.501	-124.929	-108.094	-91.145	-74.314	-57.967	-42.65	-29.09	-18.087	-10.241	-5.659	-3.885	-5.967	-8.743	-11.217	-13.35	-15.107	-16.451	-17.354	-17.787	-17.725	-17.147	-16.035	-14.374	-12.15	-9.351	-5.969	-1.994	2.58	7.758	13.547	19.949	26.969	34.61	42.875	51.765
2,2-difluoroethanol	359-13-7		-137.208	-130.923	-124.08	-116.697	-108.797	-100.41	-91.578	-82.355	-72.82	-63.08	-53.285	-43.639	-34.404	-25.899	-18.461	-12.393	-7.881	-4.939	-3.408	-3.01	-3.418	-4.331	-5.498	-7.247	-8.869	-10.138	-11.079	-11.72	-12.086	-12.202	-12.088	-11.764	-11.241	-10.525	-9.616	-8.509	-7.191	-5.645	-3.85	-1.781	-1.247	-1.981	-4.264	-8.807	-16.283	-27.065	-41.034
2,2-dimethoxypropane	77-76-9		-272.662	-263.044	-252.833	-242.038	-230.669	-218.737	-206.258	-193.247	-179.726	-165.72	-151.262	-136.395	-121.178	-105.696	-90.078	-74.517	-59.311	-44.894	-31.852	-20.865	-12.527	-7.108	-4.411	-5.999	-8.493	-10.77	-12.786	-14.499	-15.866	-16.85	-17.414	-17.527	-17.161	-16.291	-14.897	-12.961	-10.468	-7.405	-3.762	0.471	5.3	10.733	16.774	23.429	30.701	38.593	47.109
2,2-dimethyl-3-pentanone	564-04-5		-196.724	-190.45	-183.635	-176.289	-168.419	-160.035	-151.147	-141.769	-131.915	-121.608	-110.875	-99.755	-88.307	-76.621	-64.829	-53.133	-41.821	-31.285	-22	-14.45	-8.991	-5.715	-4.41	-6.226	-8.687	-10.944	-12.944	-14.639	-15.982	-16.931	-17.451	-17.509	-17.079	-16.139	-14.67	-12.658	-10.089	-6.953	-3.241	1.053	5.934	11.409	17.48	24.152	31.426	39.305	47.792
2,2-dimethylbutyricacid	595-37-9		-100.394	-97.621	-94.339	-90.557	-86.284	-81.536	-76.327	-70.68	-64.622	-58.195	-51.454	-44.478	-37.374	-30.293	-23.43	-17.026	-11.356	-6.693	-3.254	-1.142	-0.319	-0.612	-1.761	-4.42	-7.225	-9.683	-11.763	-13.439	-14.684	-15.477	-15.798	-15.631	-14.962	-13.779	-12.076	-9.847	-7.088	-3.799	0.017	4.356	8.174	11.091	12.192	9.917	2.642	-10.374	-28.419
2,2-dimethylcyclohexanone	1193-47-1		-227.601	-219.734	-211.324	-202.381	-192.918	-182.949	-172.488	-161.556	-150.173	-138.366	-126.167	-113.622	-100.789	-87.755	-74.647	-61.653	-49.044	-37.202	-26.607	-17.779	-11.145	-6.88	-4.825	-6.33	-8.636	-10.788	-12.729	-14.402	-15.754	-16.736	-17.307	-17.431	-17.075	-16.215	-14.829	-12.9	-10.413	-7.357	-3.723	0.498	5.312	10.722	16.735	23.353	30.578	38.414	46.862
2,2-dimethylheptane	1071-26-7		268.328	249.474	231.263	213.696	196.771	180.489	164.849	149.852	135.495	121.781	108.707	96.275	84.483	73.332	62.82	52.949	43.718	35.126	27.174	19.861	13.188	7.153	1.758	-2.999	-7.116	-10.595	-13.435	-15.637	-17.199	-18.123	-18.408	-18.055	-17.062	-15.431	-13.16	-10.25	-6.701	-2.513	2.315	7.783	13.89	20.638	28.026	36.055	44.724	54.034	63.986
2,2-dimethylhexane	590-73-8		268.462	249.597	231.376	213.798	196.864	180.574	164.926	149.92	135.557	121.836	108.756	96.318	84.52	73.364	62.848	52.972	43.737	35.141	27.186	19.869	13.193	7.155	1.757	-3.002	-7.123	-10.604	-13.446	-15.65	-17.215	-18.141	-18.428	-18.076	-17.086	-15.456	-13.187	-10.279	-6.732	-2.545	2.281	7.747	13.854	20.6	27.987	36.015	44.683	53.993	63.944
2,2-dimethylpentane	590-35-2		268.73	249.839	231.594	213.995	197.04	180.73	165.064	150.042	135.663	121.927	108.834	96.384	84.576	73.409	62.884	53.001	43.758	35.156	27.194	19.872	13.191	7.149	1.747	-3.015	-7.139	-10.623	-13.468	-15.674	-17.241	-18.169	-18.458	-18.108	-17.12	-15.492	-13.225	-10.32	-6.775	-2.59	2.233	7.697	13.8	20.544	27.927	35.951	44.616	53.921	63.868
2,3,3,4-tetramethylpentane	16747-38-9		268.105	249.265	231.07	213.517	196.606	180.338	164.711	149.727	135.383	121.68	108.618	96.195	84.413	73.27	62.767	52.902	43.676	35.089	27.14	19.829	13.155	7.12	1.721	-3.039	-7.163	-10.65	-13.5	-15.713	-17.289	-18.229	-18.531	-18.198	-17.227	-15.62	-13.376	-10.495	-6.977	-2.822	1.969	7.399	13.465	20.169	27.511	35.491	44.109	53.366	63.261
2,3,3-trimethyl-1-butene	594-56-9		204.813	191.098	177.815	164.955	152.508	140.469	128.833	117.595	106.754	96.31	86.265	76.623	67.39	58.571	50.176	42.214	34.694	27.627	21.025	14.897	9.254	4.108	-0.532	-4.711	-8.367	-11.473	-14.022	-16.01	-17.433	-18.286	-18.564	-18.265	-17.384	-15.917	-13.861	-11.213	-7.969	-4.127	0.317	5.364	11.017	17.278	24.15	31.634	39.733	48.447	57.779
2,3,3-trimethylpentane	560-21-4		268.692	249.81	231.572	213.98	197.031	180.726	165.065	150.047	135.671	121.939	108.848	96.399	84.591	73.425	62.9	53.015	43.771	35.167	27.203	19.878	13.193	7.148	1.741	-3.027	-7.156	-10.646	-13.498	-15.711	-17.286	-18.223	-18.522	-18.182	-17.204	-15.588	-13.333	-10.44	-6.909	-2.739	2.069	7.516	13.602	20.327	27.691	35.695	44.338	53.621	63.544
2,3,3-trimethyl-1-pentene	560-23-6		220.149	205.457	191.184	177.33	163.896	150.881	138.29	126.126	114.394	103.102	92.255	81.862	71.93	62.47	53.489	44.997	37.002	29.512	22.538	16.085	10.163	4.779	-0.061	-4.379	-8.142	-11.332	-13.948	-15.984	-17.439	-18.308	-18.589	-18.279	-17.374	-15.874	-13.774	-11.072	-7.767	-3.857	0.662	5.79	11.53	17.882	24.85	32.433	40.634	49.454	58.894
2,3,4-trimethyl-2-pentene	565-77-5		232.268	216.533	201.27	186.478	172.159	158.315	144.948	132.062	119.661	107.75	96.335	85.422	75.017	65.126	55.757	46.915	38.608	30.841	23.62	16.953	10.843	5.298	0.32	-4.109	-7.962	-11.226	-13.898	-15.977	-17.459	-18.343	-18.626	-18.306	-17.383	-15.853	-13.715	-10.968	-7.61	-3.64	0.944	6.143	11.958	18.391	25.442	33.112	41.403	50.315	59.849
2,3,4-trimethylpentane	565-75-3		269.804	250.856	232.555	214.899	197.89	181.526	165.807	150.732	136.303	122.518	109.377	96.88	85.027	73.817	63.25	53.326	44.045	35.407	27.411	20.057	13.345	7.275	1.847	-2.94	-7.085	-10.588	-13.451	-15.672	-17.252	-18.19	-18.488	-18.145	-17.161	-15.535	-13.269	-10.361	-6.812	-2.622	2.209	7.682	13.796	20.551	27.949	35.988	44.669	53.993	63.958
2,3,4-trimethylthiophene	1795-04-6		201.919	187.062	172.776	159.053	145.891	133.283	121.224	109.708	98.729	88.28	78.356	68.949	60.053	51.662	43.768	36.367	29.453	23.019	17.062	11.577	6.562	2.013	-2.071	-5.695	-8.855	-11.549	-13.775	-15.53	-16.811	-17.614	-17.936	-17.771	-17.114	-15.961	-14.304	-12.14	-9.462	-6.265	-2.544	1.707	6.463	11.744	17.558	23.909	30.798	38.228	46.2
2,3,5-trimethylhexane	1069-53-0		268.869	249.981	231.737	214.138	197.183	180.871	165.202	150.176	135.793	122.052	108.954	96.497	84.682	73.508	62.976	53.084	43.833	35.223	27.253	19.923	13.234	7.184	1.774	-2.996	-7.127	-10.618	-13.47	-15.683	-17.256	-18.19	-18.484	-18.14	-17.156	-15.533	-13.27	-10.368	-6.826	-2.645	2.176	7.637	13.737	20.478	27.859	35.881	44.543	53.846	63.79
2,3,6-trimethylpyridine	1462-84-6		-562.517	-537.284	-511.48	-485.111	-458.186	-430.716	-402.714	-374.198	-345.188	-315.713	-285.807	-255.519	-224.914	-194.087	-163.185	-132.463	-102.385	-73.81	-48.216	-27.628	-13.717	-6.459	-4.127	-6.154	-8.823	-11.203	-13.259	-14.958	-16.27	-17.171	-17.638	-17.652	-17.195	-16.255	-14.818	-12.873	-10.413	-7.427	-3.91	0.145	4.743	9.89	15.59	21.848	28.667	36.051	44.003
2,3-dichlorobutane	2211-67-8		189.206	174.279	159.965	146.261	133.164	120.671	108.778	97.479	86.77	76.646	67.101	58.127	49.719	41.867	34.563	27.798	21.562	15.843	10.63	5.911	1.673	-2.098	-5.414	-8.29	-10.738	-12.772	-14.404	-15.644	-16.502	-16.985	-17.101	-16.853	-16.242	-15.268	-13.929	-12.22	-10.135	-7.667	-4.805	-1.541	1.935	5.744	9.933	14.509	19.482	24.86	30.652
2,3-dichloropentane	600-11-3		204.133	188.7	173.868	159.635	145.997	132.95	120.49	108.613	97.314	86.587	76.426	66.827	57.782	49.286	41.331	33.91	27.015	20.641	14.778	9.419	4.558	0.186	-3.703	-7.116	-10.058	-12.535	-14.552	-16.113	-17.219	-17.874	-18.078	-17.832	-17.135	-15.986	-14.382	-12.32	-9.796	-6.808	-3.349	0.584	4.882	9.612	14.797	20.438	26.538	33.097	40.119
2,3-dihydrobenzofuran	496-16-2		-35.691	-35.327	-34.409	-32.958	-31	-28.57	-25.712	-22.487	-18.973	-15.27	-11.502	-7.817	-4.385	-1.382	1.027	2.711	3.6	3.694	3.062	1.825	0.132	-1.859	-4.006	-6.638	-9.142	-11.303	-13.119	-14.588	-15.706	-16.465	-16.855	-16.867	-16.487	-15.703	-14.502	-12.867	-10.787	-8.245	-5.229	-1.726	2.275	6.787	11.821	17.387	23.494	30.151	37.366
2,3-dihydropyran	110-87-2		-103.156	-100.363	-96.992	-93.054	-88.565	-83.545	-78.02	-72.024	-65.601	-58.811	-51.734	-44.476	-37.18	-30.024	-23.231	-17.052	-11.745	-7.532	-4.554	-2.835	-2.274	-2.678	-3.804	-6.299	-8.917	-11.213	-13.172	-14.778	-16.012	-16.857	-17.292	-17.3	-16.864	-15.965	-14.588	-12.718	-10.342	-7.446	-4.021	-0.055	4.454	9.518	15.146	21.344	28.117	35.471	43.409
2,3-dihydrothiophene	1120-59-8		123.245	114.24	105.63	97.399	89.528	82	74.8	67.913	61.324	55.021	48.995	43.236	37.737	32.493	27.5	22.756	18.259	14.011	10.012	6.266	2.776	-0.453	-3.413	-6.292	-8.892	-11.131	-13.01	-14.527	-15.678	-16.457	-16.856	-16.865	-16.473	-15.669	-14.438	-12.77	-10.65	-8.065	-5.005	-1.456	2.538	7.018	12.003	17.5	23.515	30.054	37.123
2,3-dimethyl-1,3-butadiene	513-81-5		215.002	199.271	184.133	169.582	155.615	142.226	129.41	117.161	105.476	94.348	83.771	73.741	64.251	55.296	46.871	38.971	31.591	24.726	18.373	12.529	7.191	2.356	-1.977	-5.81	-9.142	-11.971	-14.295	-16.113	-17.421	-18.217	-18.497	-18.255	-17.489	-16.193	-14.361	-11.99	-9.073	-5.605	-1.582	3.002	8.153	13.873	20.17	27.046	34.506	42.554	51.195
2,3-dimethyl-1-pentene	3404-72-6		220.295	205.462	191.067	177.11	163.59	150.507	137.865	125.665	113.912	102.61	91.766	81.384	71.472	62.037	53.086	44.626	36.665	29.211	22.272	15.853	9.964	4.609	-0.203	-4.491	-8.227	-11.394	-13.99	-16.011	-17.452	-18.311	-18.585	-18.269	-17.361	-15.858	-13.757	-11.056	-7.752	-3.842	0.675	5.801	11.539	17.891	24.857	32.441	40.642	49.463	58.905
2,3-dimethyl-2-butanol	594-60-5		-312.676	-298.947	-284.654	-269.81	-254.431	-238.533	-222.138	-205.27	-187.962	-170.249	-152.18	-133.819	-115.261	-96.645	-78.196	-60.27	-43.421	-28.426	-16.193	-7.455	-2.396	-0.521	-0.928	-3.824	-6.982	-9.754	-12.107	-14.01	-15.44	-16.374	-16.796	-16.691	-16.049	-14.859	-13.117	-10.817	-7.957	-4.535	-0.55	3.995	8.609	13.313	17.964	22.239	25.692	27.769	27.884
2,3-dimethyl-2-butene	563-79-1		205.882	192.211	178.959	166.117	153.676	141.629	129.97	118.697	107.809	97.308	87.197	77.483	68.172	59.273	50.797	42.755	35.157	28.016	21.344	15.151	9.45	4.251	-0.436	-4.659	-8.354	-11.491	-14.066	-16.074	-17.513	-18.378	-18.666	-18.374	-17.497	-16.033	-13.979	-11.332	-8.089	-4.248	0.193	5.236	10.885	17.14	24.003	31.476	39.561	48.26	57.572
2,3-dimethyl-2-hexene	7145-20-2		209.109	195.793	182.817	170.173	157.851	145.848	134.163	122.801	111.768	101.075	90.734	80.761	71.171	61.983	53.213	44.879	37	29.59	22.665	16.24	10.328	4.941	0.089	-4.266	-8.069	-11.293	-13.935	-15.992	-17.46	-18.336	-18.618	-18.301	-17.385	-15.866	-13.743	-11.012	-7.673	-3.723	0.84	6.017	11.81	18.219	25.248	32.895	41.164	50.054	59.567
2,3-dimethyl-2-pentene	10574-37-5		213.087	199.066	185.452	172.237	159.414	146.979	134.929	123.265	111.988	101.106	90.623	80.549	70.893	61.668	52.884	44.555	36.691	29.307	22.413	16.022	10.144	4.79	-0.031	-4.358	-8.137	-11.343	-13.972	-16.02	-17.485	-18.363	-18.651	-18.345	-17.443	-15.943	-13.842	-11.138	-7.827	-3.91	0.618	5.756	11.507	17.873	24.855	32.454	40.672	49.51	58.968
2,3-dimethyl-3-pentanol	595-41-5		-296.228	-282.704	-268.645	-254.068	-238.991	-223.435	-207.425	-190.987	-174.156	-156.969	-139.479	-121.752	-103.89	-86.047	-68.472	-51.56	-35.908	-22.313	-11.626	-4.419	-0.673	0.23	-0.813	-3.946	-7.223	-10.077	-12.48	-14.407	-15.838	-16.756	-17.146	-16.996	-16.298	-15.044	-13.229	-10.85	-7.904	-4.391	-0.311	4.334	9.077	13.922	18.721	23.141	26.725	28.903	29.081
2,3-dimethylpyrazine	5910-89-4		-444.808	-425.339	-405.338	-384.818	-363.792	-342.273	-320.28	-297.831	-274.953	-251.675	-228.037	-204.089	-179.902	-155.581	-131.281	-107.256	-83.914	-61.906	-42.187	-25.913	-14.038	-6.77	-3.414	-4.844	-7.224	-9.42	-11.397	-13.115	-14.541	-15.638	-16.378	-16.731	-16.673	-16.183	-15.241	-13.833	-11.942	-9.558	-6.671	-3.27	0.627	5.041	9.984	15.461	21.475	28.032	35.134
2,3-dimethylpentane	565-59-3		270.799	251.783	233.416	215.697	198.626	182.203	166.427	151.299	136.818	122.983	109.795	97.254	85.358	74.108	63.504	53.545	44.231	35.562	27.537	20.158	13.422	7.331	1.884	-2.92	-7.079	-10.595	-13.468	-15.697	-17.283	-18.226	-18.526	-18.183	-17.196	-15.567	-13.295	-10.379	-6.821	-2.62	2.224	7.711	13.842	20.615	28.032	36.092	44.796	54.143	64.133
2,3-dimethylpyridine	583-61-9		-544.504	-520.242	-495.413	-470.026	-444.088	-417.61	-390.605	-363.089	-335.084	-306.615	-277.718	-248.441	-218.851	-189.045	-159.178	-129.509	-100.502	-72.981	-48.317	-28.336	-14.543	-7.001	-4.244	-5.997	-8.489	-10.745	-12.726	-14.395	-15.722	-16.676	-17.233	-17.37	-17.069	-16.312	-15.085	-13.375	-11.171	-8.463	-5.242	-1.499	2.767	7.566	12.905	18.79	25.224	32.215	39.764
2,3-dimethylthiophene	632-16-6		200.642	185.775	171.481	157.755	144.594	131.993	119.946	108.448	97.493	87.076	77.191	67.83	58.989	50.659	42.835	35.51	28.678	22.333	16.469	11.08	6.162	1.711	-2.277	-5.809	-8.883	-11.499	-13.658	-15.358	-16.6	-17.38	-17.697	-17.548	-16.928	-15.833	-14.26	-12.203	-9.657	-6.617	-3.079	0.962	5.45	10.422	15.89	21.857	28.324	35.291	42.758
2,3-hexanedione	3848-24-6		-66.903	-66.547	-65.662	-64.264	-62.368	-59.995	-57.167	-53.911	-50.26	-46.254	-41.942	-37.385	-32.661	-27.865	-23.114	-18.548	-14.322	-10.6	-7.534	-5.244	-3.794	-3.179	-3.322	-5.242	-7.522	-9.604	-11.465	-13.075	-14.404	-15.421	-16.093	-16.392	-16.291	-15.764	-14.789	-13.348	-11.421	-8.996	-6.058	-2.597	1.378	5.887	10.94	16.544	22.704	29.424	36.708
2,3-pentanedione	600-14-6		-75.627	-74.757	-73.401	-71.568	-69.272	-66.527	-63.352	-59.77	-55.809	-51.503	-46.898	-42.046	-37.017	-31.896	-26.789	-21.826	-17.152	-12.931	-9.322	-6.462	-4.446	-3.301	-2.983	-4.656	-6.787	-8.774	-10.592	-12.212	-13.602	-14.725	-15.545	-16.028	-16.141	-15.852	-15.135	-13.965	-12.321	-10.184	-7.539	-4.371	-0.688	3.533	8.302	13.629	19.518	25.976	33.007
2,4,4-trimethyl-1-pentene	107-39-1		201.826	189.287	177.043	165.078	153.383	141.951	130.782	119.88	109.254	98.917	88.888	79.184	69.827	60.84	52.244	44.061	36.312	29.015	22.19	15.852	10.017	4.697	-0.095	-4.395	-8.149	-11.331	-13.937	-15.965	-17.411	-18.271	-18.543	-18.223	-17.31	-15.8	-13.69	-10.979	-7.665	-3.744	0.784	5.922	11.672	18.035	25.013	32.607	40.819	49.65	59.102
2,4,4-trimethyl-2-pentanethiol	141-59-3		13.594	11.492	9.92	8.856	8.272	8.133	8.395	9	9.875	10.931	12.058	13.133	14.017	14.572	14.67	14.216	13.163	11.517	9.341	6.737	3.836	0.777	-2.308	-5.709	-8.87	-11.584	-13.839	-15.622	-16.922	-17.727	-18.027	-17.812	-17.075	-15.808	-14.005	-11.659	-8.766	-5.322	-1.324	3.231	8.245	13.762	19.795	26.334	33.37	40.889	48.878
2,4,4-trimethylhexane	16747-30-1		269.237	250.325	232.058	214.437	197.46	181.127	165.438	150.393	135.992	122.234	109.119	96.647	84.818	73.63	63.085	53.182	43.92	35.299	27.32	19.982	13.285	7.229	1.813	-2.962	-7.096	-10.591	-13.445	-15.659	-17.233	-18.167	-18.461	-18.115	-17.129	-15.504	-13.238	-10.332	-6.785	-2.599	2.227	7.694	13.802	20.55	27.938	35.968	44.639	53.95	63.903
2,4,5-trimethylthiazole	13623-11-5		-448.633	-428.222	-407.298	-385.868	-363.944	-341.538	-318.665	-295.341	-271.586	-247.427	-222.895	-198.041	-172.933	-147.685	-122.484	-97.653	-73.754	-51.699	-32.775	-18.326	-9.04	-4.45	-3.263	-5.457	-8.15	-10.555	-12.638	-14.368	-15.718	-16.664	-17.183	-17.257	-16.868	-16.003	-14.648	-12.793	-10.427	-7.542	-4.131	-0.185	4.299	9.329	14.909	21.044	27.738	34.994	42.817
2,4,6,8,10-pentamethylcyclopentasiloxane	6166-86-5		12.5	10.956	9.832	9.115	8.783	8.809	9.156	9.777	10.611	11.583	12.599	13.553	14.326	14.796	14.852	14.408	13.416	11.877	9.839	7.391	4.649	1.738	-1.216	-4.629	-7.835	-10.578	-12.851	-14.648	-15.96	-16.78	-17.101	-16.915	-16.216	-14.996	-13.248	-10.968	-8.147	-4.782	-0.866	3.606	8.638	14.235	20.401	27.141	34.457	42.354	50.836
2,4,6,8-tetraethenylcyclotetrasiloxane	239026		31.236	31.676	32.336	33.185	34.175	35.245	36.311	37.272	38.004	38.372	38.24	37.49	36.042	33.87	31.011	27.557	23.639	19.407	15.013	10.595	6.273	2.145	-1.709	-5.435	-8.764	-11.594	-13.922	-15.746	-17.062	-17.866	-18.155	-17.924	-17.169	-15.886	-14.071	-11.72	-8.827	-5.39	-1.404	3.135	8.232	13.89	20.113	26.904	34.268	42.208	50.726
2,4,6-cycloheptatrien-1-one	539-80-0		-364.034	-349.633	-334.693	-319.222	-303.233	-286.739	-269.754	-252.297	-234.387	-216.047	-197.307	-178.2	-158.774	-139.093	-119.253	-99.407	-79.808	-60.864	-43.212	-27.728	-15.372	-6.816	-2.058	-2.794	-4.854	-6.915	-8.911	-10.778	-12.459	-13.901	-15.059	-15.894	-16.376	-16.477	-16.174	-15.451	-14.291	-12.68	-10.608	-8.063	-5.116	-1.708	2.186	6.574	11.462	16.859	22.771
2,4,6-trimethylbenzenamine	88-05-1		-257.204	-244.344	-230.92	-216.943	-202.426	-187.385	-171.84	-155.821	-139.368	-122.543	-105.442	-88.221	-71.128	-54.557	-39.084	-25.468	-14.504	-6.747	-2.231	-0.458	-0.652	-2.058	-4.09	-6.777	-9.329	-11.517	-13.336	-14.78	-15.843	-16.518	-16.797	-16.676	-16.146	-15.202	-13.84	-12.053	-9.84	-7.196	-4.12	-0.61	2.9	6.585	10.486	14.565	18.786	23.114	27.519
2,4-dichloro-1-methylbenzene	95-73-8		229.012	212.21	196.02	180.439	165.467	151.101	137.34	124.182	111.626	99.669	88.308	77.542	67.368	57.783	48.785	40.369	32.533	25.272	18.584	12.464	6.907	1.909	-2.535	-6.43	-9.781	-12.595	-14.877	-16.633	-17.868	-18.589	-18.802	-18.514	-17.728	-16.452	-14.691	-12.448	-9.729	-6.537	-2.875	1.255	5.684	10.497	15.721	21.349	27.378	33.805	40.628
2,4-dichloro-1-(trifluoromethyl)-benzene	320-60-5		236.073	218.771	202.093	186.039	170.606	155.795	141.602	128.028	115.07	102.727	90.996	79.877	69.367	59.464	50.165	41.469	33.371	25.869	18.959	12.639	6.904	1.749	-2.83	-6.838	-10.281	-13.165	-15.497	-17.283	-18.532	-19.252	-19.452	-19.14	-18.328	-17.024	-15.239	-12.984	-10.269	-7.103	-3.497	0.54	4.542	8.72	13.135	17.767	22.601	27.628	32.844
2,4-difluoroaniline	367-25-9		-163.85	-153.884	-143.395	-132.399	-120.918	-108.978	-96.623	-83.916	-70.955	-57.894	-44.971	-32.538	-21.083	-11.201	-3.477	1.709	4.352	4.822	3.703	1.594	-1.014	-3.768	-6.433	-9.094	-11.397	-13.243	-14.648	-15.631	-16.212	-16.413	-16.257	-15.768	-14.969	-13.883	-12.53	-10.928	-9.093	-7.035	-4.759	-2.264	-0.763	0.303	1.133	1.722	2.081	2.245	2.258
2,4-dimethyl-1,3-pentadiene	1000-86-8		198.321	184.175	170.541	157.413	144.785	132.652	121.008	109.848	99.167	88.959	79.219	69.944	61.13	52.774	44.872	37.425	30.431	23.889	17.802	12.171	6.999	2.29	-1.951	-5.761	-9.094	-11.932	-14.269	-16.099	-17.418	-18.22	-18.499	-18.248	-17.462	-16.134	-14.258	-11.83	-8.842	-5.29	-1.168	3.528	8.804	14.663	21.109	28.147	35.78	44.011	52.844
2,4-dimethyl-1-pentene	2213-32-3		189.075	177.356	165.951	154.838	143.997	133.414	123.077	112.982	103.129	93.523	84.177	75.104	66.325	57.859	49.73	41.962	34.578	27.6	21.051	14.95	9.315	4.165	-0.486	-4.684	-8.357	-11.473	-14.028	-16.017	-17.436	-18.28	-18.547	-18.231	-17.329	-15.838	-13.755	-11.076	-7.799	-3.921	0.56	5.648	11.343	17.648	24.566	32.098	40.245	49.009	58.393
2,4-dimethyl-2-pentanol	625-06-9		-310.207	-296.536	-282.29	-267.482	-252.124	-236.234	-219.83	-202.936	-185.581	-167.801	-149.645	-131.179	-112.501	-93.763	-75.209	-57.234	-40.444	-25.684	-13.896	-5.773	-1.375	-0.076	-0.907	-3.959	-7.187	-10.006	-12.385	-14.296	-15.717	-16.629	-17.018	-16.871	-16.178	-14.932	-13.128	-10.761	-7.831	-4.335	-0.274	4.349	9.085	13.95	18.81	23.364	27.183	29.725	30.393
2,4-dimethylaniline	95-68-1		-268.002	-254.098	-239.663	-224.707	-209.244	-193.291	-176.869	-160.009	-142.752	-125.166	-107.353	-89.482	-71.823	-54.8	-39.034	-25.316	-14.44	-6.895	-2.608	-0.991	-1.236	-2.599	-4.523	-7.039	-9.412	-11.435	-13.105	-14.421	-15.381	-15.982	-16.22	-16.091	-15.592	-14.718	-13.467	-11.836	-9.823	-7.425	-4.642	-1.473	1.475	4.445	7.503	10.605	13.714	16.8	19.846
2,4-dimethyl-3-thiapentane	625-80-9		-38.273	-38.487	-38.138	-37.239	-35.809	-33.871	-31.456	-28.603	-25.366	-21.813	-18.031	-14.134	-10.263	-6.584	-3.281	-0.543	1.465	2.628	2.907	2.345	1.06	-0.781	-2.992	-6.012	-8.971	-11.549	-13.726	-15.482	-16.795	-17.646	-18.018	-17.894	-17.257	-16.095	-14.394	-12.144	-9.334	-5.957	-2.005	2.529	7.651	13.365	19.677	26.589	34.105	42.228	50.961
2,4-dimethyl-2-pentene	625-65-0		203.758	191.026	178.594	166.451	154.587	142.998	131.685	120.653	109.911	99.472	89.354	79.573	70.151	61.108	52.464	44.241	36.458	29.133	22.283	15.925	10.071	4.736	-0.069	-4.39	-8.163	-11.36	-13.978	-16.013	-17.463	-18.325	-18.594	-18.27	-17.349	-15.828	-13.706	-10.98	-7.648	-3.708	0.843	6.005	11.78	18.171	25.178	32.803	41.048	49.913	59.401
2,4-dimethyl-3-pentanol	600-36-2		-269.982	-257.409	-244.346	-230.811	-216.824	-202.409	-187.589	-172.392	-156.846	-140.986	-124.86	-108.529	-92.091	-75.701	-59.611	-44.221	-30.118	-18.053	-8.778	-2.741	0.16	0.53	-0.808	-4.021	-7.323	-10.189	-12.594	-14.516	-15.936	-16.838	-17.209	-17.039	-16.318	-15.041	-13.202	-10.798	-7.827	-4.288	-0.181	4.492	9.239	14.068	18.819	23.142	26.547	28.434	28.188
2,4-dimethylbenzaldehyde	15764-16-6		-199.556	-191.406	-182.774	-173.678	-164.137	-154.172	-143.809	-133.076	-122.005	-110.638	-99.026	-87.239	-75.373	-63.564	-52.002	-40.949	-30.742	-21.777	-14.44	-9.014	-5.576	-3.965	-3.836	-5.946	-8.436	-10.679	-12.641	-14.292	-15.603	-16.545	-17.095	-17.231	-16.933	-16.185	-14.972	-13.28	-11.099	-8.417	-5.227	-1.521	2.707	7.462	12.753	18.585	24.962	31.889	39.371
2,4-dimethylpentane	108-08-7		269.399	250.469	232.186	214.549	197.557	181.211	165.51	150.453	136.042	122.274	109.15	96.67	84.833	73.639	63.087	53.179	43.912	35.288	27.305	19.965	13.265	7.207	1.79	-2.985	-7.12	-10.614	-13.468	-15.68	-17.252	-18.184	-18.475	-18.125	-17.135	-15.504	-13.233	-10.321	-6.768	-2.574	2.261	7.737	13.854	20.613	28.013	36.055	44.738	54.064	64.033
2,4-dimethylthiazole	541-58-2		-399.047	-381.153	-362.736	-343.803	-324.364	-304.427	-284.006	-263.116	-241.776	-220.01	-197.854	-175.358	-152.598	-129.699	-106.868	-84.458	-63.058	-43.569	-27.163	-14.926	-7.272	-3.658	-2.937	-5.195	-7.867	-10.239	-12.283	-13.976	-15.296	-16.223	-16.74	-16.831	-16.483	-15.684	-14.424	-12.693	-10.484	-7.789	-4.602	-0.917	3.175	7.729	12.763	18.277	24.269	30.739	37.683
2,4-dimethylpyrrole	625-82-1		58.615	52.757	47.399	42.52	38.098	34.107	30.517	27.292	24.395	21.781	19.404	17.213	15.159	13.191	11.263	9.334	7.376	5.37	3.31	1.206	-0.923	-3.043	-5.118	-7.571	-9.885	-11.85	-13.46	-14.713	-15.603	-16.124	-16.273	-16.044	-15.435	-14.445	-13.075	-11.326	-9.206	-6.722	-3.884	-0.706	1.881	4.076	5.869	7.1	7.639	7.411	6.411
2,4-dithiapentane	1618-26-4		73.652	68.173	63.1	58.401	54.039	49.977	46.174	42.585	39.17	35.885	32.692	29.557	26.454	23.361	20.269	17.176	14.088	11.019	7.988	5.02	2.141	-0.62	-3.235	-6.011	-8.585	-10.811	-12.687	-14.213	-15.384	-16.193	-16.631	-16.69	-16.356	-15.62	-14.466	-12.884	-10.86	-8.381	-5.435	-2.011	1.837	6.156	10.969	16.284	22.107	28.445	35.303
2,4-hexadienal	142-83-6		-254.697	-245.289	-235.339	-224.859	-213.862	-202.364	-190.381	-177.935	-165.049	-151.754	-138.085	-124.09	-109.834	-95.407	-80.943	-66.635	-52.768	-39.738	-28.051	-18.256	-10.813	-5.911	-3.387	-4.604	-6.714	-8.749	-10.66	-12.397	-13.91	-15.151	-16.078	-16.652	-16.842	-16.617	-15.955	-14.832	-13.233	-11.142	-8.545	-5.432	-1.832	2.287	6.938	12.129	17.863	24.147	30.983
2,5,8,11-tetraoxadodecane	112-49-2		-609.74	-564.903	-519.791	-474.641	-429.829	-385.936	-343.771	-304.294	-268.345	-236.268	-207.764	-182.101	-158.483	-136.291	-115.146	-94.9	-75.615	-57.56	-41.222	-27.25	-16.294	-8.723	-4.414	-5.297	-7.418	-9.451	-11.348	-13.056	-14.522	-15.696	-16.531	-16.984	-17.017	-16.598	-15.698	-14.293	-12.363	-9.891	-6.862	-3.263	0.915	5.681	11.042	17.005	23.575	30.757	38.554
2,5-dichlorothiophene	3172-52-9		236.769	219.656	203.151	187.253	171.961	157.275	143.194	129.715	116.839	104.564	92.889	81.812	71.332	61.448	52.156	43.456	35.345	27.82	20.88	14.521	8.74	3.534	-1.102	-5.17	-8.676	-11.624	-14.019	-15.868	-17.176	-17.95	-18.196	-17.922	-17.135	-15.844	-14.056	-11.78	-9.024	-5.797	-2.107	2.04	6.359	10.98	15.939	21.218	26.806	32.692	38.867
2,5-dihydrothiophene	1708-32-3		-4.983	-6.431	-7.393	-7.894	-7.962	-7.632	-6.945	-5.952	-4.712	-3.298	-1.789	-0.279	1.133	2.349	3.273	3.826	3.953	3.631	2.868	1.707	0.213	-1.532	-3.437	-5.974	-8.46	-10.632	-12.489	-14.022	-15.224	-16.082	-16.584	-16.715	-16.459	-15.799	-14.72	-13.205	-11.238	-8.804	-5.887	-2.476	1.437	5.867	10.826	16.324	22.369	28.969	36.132
2,5-dimethyl-1,3,5-hexatriene	4916-663-6		208.987	193.472	178.554	164.23	150.494	137.343	124.771	112.772	101.341	90.472	80.159	70.395	61.174	52.49	44.335	36.702	29.586	22.981	16.879	11.276	6.166	1.546	-2.589	-6.24	-9.411	-12.102	-14.314	-16.044	-17.293	-18.057	-18.332	-18.115	-17.401	-16.185	-14.461	-12.224	-9.466	-6.182	-2.366	1.99	6.89	12.342	18.35	24.922	32.061	39.773	48.063
2,5-dimethyl-1,5-hexadiene	627-58-7		175.263	163.013	151.221	139.874	128.958	118.462	108.372	98.679	89.371	80.441	71.88	63.683	55.847	48.37	41.251	34.494	28.102	22.08	16.437	11.18	6.319	1.864	-2.173	-5.889	-9.17	-11.964	-14.267	-16.072	-17.374	-18.166	-18.442	-18.195	-17.419	-16.107	-14.251	-11.847	-8.887	-5.366	-1.277	3.383	8.621	14.442	20.849	27.847	35.44	43.632	52.426
2,5-dimethylfuran	625-86-5		133.207	124.282	115.708	107.463	99.519	91.854	84.446	77.276	70.331	63.599	57.073	50.751	44.636	38.732	33.048	27.594	22.383	17.429	12.745	8.346	4.246	0.46	-2.999	-6.25	-9.147	-11.628	-13.691	-15.333	-16.548	-17.329	-17.669	-17.56	-16.992	-15.955	-14.441	-12.44	-9.941	-6.936	-3.414	0.631	5.2	10.306	15.958	22.162	28.925	36.251	44.147
2,5-dimethylpyrazine	123-32-0		-434.116	-415.667	-396.686	-377.182	-357.163	-336.64	-315.627	-294.138	-272.192	-249.813	-227.032	-203.888	-180.442	-156.777	-133.028	-109.413	-86.299	-64.287	-44.298	-27.517	-15.034	-7.24	-3.558	-4.907	-7.276	-9.482	-11.48	-13.228	-14.681	-15.803	-16.557	-16.915	-16.847	-16.333	-15.353	-13.89	-11.93	-9.461	-6.474	-2.961	1.063	5.616	10.709	16.345	22.528	29.26	36.545
2,5-dimethylhexane	592-13-2		269.301	250.389	232.122	214.499	197.521	181.186	165.496	150.449	136.046	122.286	109.169	96.694	84.862	73.671	63.123	53.217	43.953	35.33	27.348	20.008	13.309	7.25	1.833	-2.944	-7.079	-10.575	-13.429	-15.643	-17.216	-18.148	-18.44	-18.091	-17.102	-15.471	-13.2	-10.288	-6.734	-2.54	2.296	7.774	13.893	20.653	28.056	36.101	44.788	54.118	64.091
2,5-dimethylpyridine	589-93-5		-543.524	-519.369	-494.684	-469.476	-443.754	-417.528	-390.809	-363.611	-335.952	-307.852	-279.339	-250.449	-221.233	-191.77	-162.184	-132.696	-103.713	-75.993	-50.845	-30.126	-15.541	-7.399	-4.328	-6.027	-8.522	-10.793	-12.793	-14.482	-15.823	-16.786	-17.342	-17.468	-17.144	-16.354	-15.084	-13.319	-11.051	-8.27	-4.967	-1.136	3.224	8.122	13.565	19.556	26.101	33.202	40.863
2,5-dimethylthiophene	638-02-8		200.084	185.188	170.872	157.131	143.963	131.36	119.318	107.832	96.895	86.501	76.642	67.313	58.507	50.215	42.431	35.147	28.356	22.051	16.226	10.874	5.99	1.568	-2.394	-5.901	-8.955	-11.556	-13.705	-15.4	-16.64	-17.422	-17.742	-17.595	-16.975	-15.878	-14.296	-12.223	-9.652	-6.576	-2.988	1.118	5.746	10.905	16.601	22.84	29.629	36.971	44.873
2,5-norbornadiene	121-46-0		112.53	105.493	98.828	92.496	86.452	80.652	75.049	69.598	64.256	58.987	53.762	48.562	43.378	38.216	33.088	28.02	23.043	18.192	13.506	9.026	4.788	0.829	-2.816	-6.336	-9.486	-12.166	-14.371	-16.099	-17.342	-18.097	-18.358	-18.118	-17.373	-16.115	-14.34	-12.042	-9.215	-5.853	-1.951	2.495	7.49	13.04	19.147	25.817	33.052	40.857	49.235
2,6,10,15,19,23-hexamethyltetracosane	111-01-3		266.93	248.185	230.078	212.609	195.779	179.586	164.031	149.114	134.834	121.191	108.185	95.816	84.084	72.988	62.529	52.706	43.52	34.969	27.055	19.776	13.134	7.127	1.756	-2.98	-7.079	-10.543	-13.372	-15.565	-17.122	-18.044	-18.33	-17.981	-16.995	-15.374	-13.118	-10.225	-6.696	-2.532	2.269	7.706	13.779	20.489	27.835	35.818	44.438	53.695	63.589
2,6-diisopropylaniline	24544-04-5		-185.104	-173.906	-162.198	-149.996	-137.319	-124.193	-110.654	-96.758	-82.588	-68.272	-54.013	-40.118	-27.031	-15.338	-5.692	1.366	5.625	7.304	6.946	5.198	2.636	-0.306	-3.328	-6.494	-9.37	-11.82	-13.839	-15.422	-16.561	-17.253	-17.492	-17.274	-16.597	-15.458	-13.856	-11.791	-9.263	-6.275	-2.83	1.07	4.997	9.098	13.398	17.843	22.379	26.953	31.521
2,6-dimethyl-1,3-dioxan-4-ol-acetate	828-00-2		-148.278	-143.524	-138.296	-132.606	-126.47	-119.905	-112.931	-105.571	-97.853	-89.81	-81.486	-72.936	-64.232	-55.468	-46.769	-38.295	-30.248	-22.864	-16.398	-11.087	-7.099	-4.491	-3.189	-4.683	-6.838	-8.846	-10.681	-12.312	-13.706	-14.826	-15.637	-16.105	-16.195	-15.88	-15.132	-13.926	-12.243	-10.063	-7.372	-4.156	-0.419	3.858	8.686	14.073	20.024	26.545	33.64
2,6-dimethyl-4-heptanol	108-80-7		-279.727	-266.849	-253.423	-239.463	-224.984	-210.004	-194.543	-178.624	-162.277	-145.539	-128.461	-111.117	-93.623	-76.164	-59.044	-42.744	-27.966	-15.585	-6.415	-0.832	1.454	1.237	-0.556	-3.943	-7.331	-10.261	-12.709	-14.653	-16.078	-16.967	-17.311	-17.099	-16.325	-14.983	-13.071	-10.586	-7.527	-3.894	0.31	5.083	9.948	14.903	19.784	24.232	27.741	29.677	29.382
2,6-dimethyl-heptane	1072-05-5		269.219	250.313	232.051	214.434	197.461	181.131	165.445	150.402	136.003	122.246	109.132	96.66	84.83	73.643	63.097	53.193	43.931	35.31	27.331	19.992	13.295	7.239	1.824	-2.951	-7.084	-10.577	-13.429	-15.64	-17.211	-18.141	-18.43	-18.078	-17.086	-15.452	-13.178	-10.263	-6.706	-2.509	2.33	7.811	13.933	20.697	28.102	36.15	44.84	54.172	64.147
2,6-dimethylmorpholine	141-91-3		-632.479	-602.097	-571.151	-539.66	-507.649	-475.15	-442.201	-408.857	-375.183	-341.264	-307.21	-273.155	-239.265	-205.743	-172.838	-140.863	-110.249	-81.633	-55.979	-34.589	-18.724	-8.824	-4.073	-5.274	-7.655	-9.859	-11.834	-13.531	-14.906	-15.918	-16.532	-16.718	-16.451	-15.709	-14.476	-12.735	-10.478	-7.694	-4.377	-0.522	3.723	8.424	13.598	19.231	25.304	31.8	38.695
2,6-dimethylpiperidine	504-03-0		-788.661	-753.397	-717.516	-681.023	-643.927	-606.238	-567.971	-529.144	-489.782	-449.916	-409.587	-368.85	-327.777	-286.463	-245.033	-203.672	-162.669	-122.565	-84.493	-50.767	-25.012	-9.918	-4.145	-5.841	-8.653	-11.189	-13.383	-15.182	-16.541	-17.425	-17.807	-17.664	-16.98	-15.742	-13.941	-11.57	-8.624	-5.098	-0.992	3.697	8.904	14.657	20.963	27.815	35.204	43.121	51.554
2,7-dimethyloctane	1072-16-8		268.746	249.871	231.639	214.051	197.105	180.803	165.143	150.126	135.75	122.017	108.925	96.475	84.665	73.497	62.97	53.084	43.838	35.233	27.267	19.943	13.258	7.213	1.808	-2.958	-7.083	-10.569	-13.415	-15.621	-17.188	-18.115	-18.403	-18.051	-17.059	-15.427	-13.156	-10.244	-6.693	-2.501	2.331	7.803	13.916	20.67	28.064	36.099	44.776	54.094	64.053
2-(2-aminoethoxy)ethanol	929-06-6		-651.602	-616.525	-580.961	-544.957	-508.578	-471.906	-435.05	-398.152	-361.387	-324.963	-289.119	-254.102	-220.149	-187.459	-156.193	-126.488	-98.533	-72.664	-49.485	-29.896	-14.859	-4.876	0.439	-0.334	-2.529	-4.733	-6.883	-8.913	-10.763	-12.372	-13.689	-14.667	-15.267	-15.457	-15.209	-14.502	-13.318	-11.643	-9.467	-6.781	-3.929	-0.756	2.775	6.624	10.737	15.043	19.444
2-(2-butoxyethoxy)ethanolacetate	124-17-4		-476.446	-448.693	-420.578	-392.159	-363.512	-334.731	-305.933	-277.264	-248.9	-221.045	-193.925	-167.779	-142.836	-119.306	-97.37	-77.202	-58.997	-43.006	-29.539	-18.89	-11.212	-6.389	-4.023	-5.468	-7.756	-9.878	-11.793	-13.46	-14.835	-15.88	-16.559	-16.837	-16.687	-16.082	-15.001	-13.426	-11.339	-8.728	-5.581	-1.889	2.354	7.157	12.526	18.466	24.982	32.078	39.756
2-(2-methoxyethoxy)ethanol	111-77-3		-334.58	-320.853	-306.649	-291.979	-276.854	-261.287	-245.293	-228.889	-212.095	-194.937	-177.446	-159.663	-141.647	-123.479	-105.281	-87.236	-69.623	-52.859	-37.52	-24.31	-13.908	-6.706	-2.618	-3.553	-5.704	-7.79	-9.764	-11.572	-13.162	-14.481	-15.48	-16.114	-16.343	-16.133	-15.454	-14.28	-12.589	-10.364	-7.59	-4.253	-0.491	3.728	8.38	13.382	18.596	23.798	28.643
2-(2-ethoxyethoxy)-ethanolacetate	112-15-2		-380.539	-359.686	-338.427	-316.82	-294.94	-272.875	-250.733	-228.641	-206.74	-185.18	-164.115	-143.69	-124.034	-105.257	-87.464	-70.771	-55.341	-41.405	-29.27	-19.272	-11.677	-6.559	-3.732	-4.91	-7.056	-9.092	-10.98	-12.675	-14.13	-15.3	-16.143	-16.619	-16.691	-16.33	-15.508	-14.201	-12.39	-10.058	-7.19	-3.775	0.193	4.727	9.832	15.517	21.784	28.64	36.087
2-(2-propoxyethoxy)ethanol	6881-94-3		-334.453	-320.821	-306.699	-292.093	-277.013	-261.468	-245.471	-229.035	-212.179	-194.925	-177.301	-159.348	-141.122	-122.705	-104.227	-85.889	-68.008	-51.066	-35.733	-22.811	-13.01	-6.635	-3.412	-4.809	-7.209	-9.438	-11.449	-13.195	-14.631	-15.714	-16.408	-16.678	-16.496	-15.836	-14.677	-13.002	-10.795	-8.043	-4.735	-0.864	3.434	8.189	13.38	18.936	24.741	30.619	36.308
2-(diethylamino)-ethanol	100-37-8		-727.16	-677.44	-627.594	-577.71	-527.903	-478.341	-429.284	-381.153	-334.597	-290.519	-249.917	-213.496	-181.265	-152.552	-126.431	-102.162	-79.417	-58.348	-39.591	-24.135	-12.909	-6.19	-3.347	-5.083	-7.691	-10.084	-12.203	-13.992	-15.404	-16.397	-16.935	-16.989	-16.535	-15.554	-14.029	-11.948	-9.3	-6.077	-2.274	2.115	6.981	12.334	18.139	24.307	30.693	37.057	43.019
2-(bis(1-methylethyl)amino)ethanol	96-80-0		-453.636	-427.89	-402.486	-377.496	-352.971	-328.923	-305.331	-282.14	-259.271	-236.635	-214.145	-191.723	-169.32	-146.923	-124.575	-102.414	-80.733	-60.07	-41.297	-25.576	-14.006	-7.007	-4.012	-5.704	-8.288	-10.66	-12.755	-14.518	-15.898	-16.851	-17.344	-17.345	-16.832	-15.784	-14.187	-12.027	-9.295	-5.983	-2.084	2.405	7.429	12.99	19.069	25.615	32.537	39.685	46.804
2-(dimethylamino)-ethanol	108-01-0		-463.759	-439.629	-415.426	-391.208	-367.029	-342.935	-318.96	-295.127	-271.444	-247.908	-224.51	-201.235	-178.076	-155.045	-132.186	-109.616	-87.565	-66.463	-47.017	-30.227	-17.168	-8.488	-3.975	-5.037	-7.324	-9.501	-11.502	-13.26	-14.716	-15.819	-16.52	-16.781	-16.571	-15.86	-14.628	-12.856	-10.53	-7.638	-4.17	-0.12	4.397	9.416	14.922	20.852	27.102	33.494	39.736
2-(dimethylamino)ethyl-2-methyl-2-propenoate	2867-47-2		-463.397	-441.731	-419.514	-396.756	-373.467	-349.66	-325.355	-300.575	-275.353	-249.735	-223.787	-197.604	-171.326	-145.159	-119.413	-94.545	-71.215	-50.301	-32.803	-19.536	-10.737	-5.917	-4.113	-5.951	-8.465	-10.746	-12.754	-14.449	-15.793	-16.753	-17.298	-17.402	-17.041	-16.195	-14.848	-12.983	-10.59	-7.658	-4.178	-0.142	4.453	9.615	15.347	21.655	28.542	36.01	44.063
2-(ethylamino)ethanol	110-73-6		-559.129	-527.285	-494.966	-462.228	-429.148	-395.832	-362.421	-329.096	-296.088	-263.662	-232.107	-201.695	-172.642	-145.086	-119.093	-94.728	-72.148	-51.721	-34.07	-19.969	-9.992	-4.115	-1.648	-3.43	-6.032	-8.416	-10.534	-12.341	-13.799	-14.869	-15.522	-15.729	-15.468	-14.721	-13.472	-11.708	-9.419	-6.599	-3.241	0.658	4.768	9.152	13.755	18.408	22.854	26.72	29.499
2-(methylamino)-ethanol	109-83-1		-563.106	-531.449	-499.423	-467.09	-434.52	-401.802	-369.042	-336.366	-303.924	-271.891	-240.458	-209.826	-180.198	-151.761	-124.695	-99.201	-75.554	-54.186	-35.729	-20.915	-10.279	-3.803	-0.832	-2.385	-4.877	-7.203	-9.316	-11.167	-12.714	-13.915	-14.734	-15.139	-15.103	-14.603	-13.618	-12.135	-10.139	-7.621	-4.574	-0.991	2.714	6.651	10.782	14.947	18.905	22.317	24.727
2-(ethylthio)-ethanol	110-77-0		-273.067	-261.28	-248.951	-236.092	-222.715	-208.835	-194.473	-179.654	-164.409	-148.784	-132.84	-116.662	-100.376	-84.162	-68.285	-53.114	-39.135	-26.919	-17.006	-9.739	-5.12	-2.813	-2.284	-4.242	-6.641	-8.814	-10.738	-12.387	-13.733	-14.751	-15.413	-15.696	-15.575	-15.03	-14.04	-12.589	-10.662	-8.245	-5.327	-1.899	1.649	5.359	9.122	12.664	15.563	17.219	16.891
2-(ethylthio)-2-methylpropane	14920-92-7		-47.311	-46.951	-46.043	-44.601	-42.641	-40.187	-37.267	-33.92	-30.196	-26.161	-21.904	-17.536	-13.197	-9.058	-5.31	-2.151	0.243	1.744	2.304	1.964	0.844	-0.88	-3.014	-6.011	-8.962	-11.535	-13.71	-15.466	-16.781	-17.637	-18.013	-17.894	-17.264	-16.108	-14.414	-12.17	-9.367	-5.995	-2.047	2.483	7.602	13.315	19.626	26.539	34.058	42.185	50.924
2-(n-morpholino)-2'-hydroxydiethylether	3603-45-0		-510.255	-476.537	-443.855	-412.222	-381.668	-352.228	-323.913	-296.694	-270.489	-245.181	-220.63	-196.704	-173.297	-150.35	-127.862	-105.917	-84.715	-64.618	-46.2	-30.237	-17.548	-8.666	-3.526	-4.191	-6.252	-8.263	-10.176	-11.934	-13.483	-14.769	-15.741	-16.355	-16.57	-16.352	-15.672	-14.503	-12.826	-10.622	-7.876	-4.578	-0.751	3.618	8.528	13.962	19.891	26.255	32.959
2-2-(2-butoxyethoxy)ethoxyethanol	143-22-6		-699.876	-630.92	-561.6	-492.212	-423.548	-357.711	-299.291	-253.898	-221.832	-197.761	-177.078	-157.651	-138.704	-119.991	-101.494	-83.336	-65.785	-49.284	-34.46	-22.051	-12.692	-6.631	-3.581	-5.011	-7.409	-9.627	-11.619	-13.339	-14.745	-15.794	-16.452	-16.687	-16.469	-15.774	-14.583	-12.877	-10.642	-7.865	-4.536	-0.645	3.686	8.485	13.732	19.36	25.265	31.281	37.163
2-2-(2-methoxyethoxy)ethoxyethanol	112-35-6		-326.792	-312.972	-298.904	-284.553	-269.89	-254.894	-239.548	-223.843	-207.776	-191.352	-174.586	-157.505	-140.152	-122.596	-104.945	-87.368	-70.127	-53.619	-38.404	-25.183	-14.655	-7.27	-3	-3.879	-6.014	-8.087	-10.047	-11.843	-13.42	-14.725	-15.708	-16.325	-16.536	-16.305	-15.604	-14.406	-12.689	-10.437	-7.633	-4.265	-0.441	3.868	8.651	13.851	19.372	25.066	30.704
2-2-(2-ethoxyethoxy)ethoxyethanol	112-50-5		-355.053	-336.57	-318.443	-300.624	-283.04	-265.611	-248.25	-230.88	-213.434	-195.862	-178.13	-160.228	-142.17	-124.005	-105.826	-87.8	-70.194	-53.423	-38.076	-24.878	-14.531	-7.435	-3.479	-4.523	-6.74	-8.851	-10.806	-12.555	-14.047	-15.233	-16.069	-16.515	-16.536	-16.101	-15.183	-13.762	-11.817	-9.332	-6.296	-2.696	1.36	5.902	10.919	16.354	22.12	28.08	34.024
2-2-(hexyloxy)ethoxyethanol	112-59-4		-384.993	-355.558	-327.966	-302.561	-279.398	-258.224	-238.584	-219.978	-201.97	-184.234	-166.554	-148.808	-130.951	-113.007	-95.081	-77.381	-60.256	-44.246	-30.079	-18.556	-10.279	-5.349	-3.302	-5.182	-7.814	-10.193	-12.277	-14.024	-15.396	-16.36	-16.885	-16.947	-16.523	-15.595	-14.147	-12.165	-9.64	-6.562	-2.923	1.283	5.91	10.983	16.478	22.313	28.363	34.438	40.266
2-allylphenol	1745-81-9		8.506	8.339	8.615	9.292	10.316	11.619	13.116	14.702	16.258	17.645	18.723	19.355	19.433	18.888	17.706	15.929	13.642	10.963	8.023	4.948	1.853	-1.163	-4.022	-6.921	-9.531	-11.736	-13.54	-14.943	-15.948	-16.555	-16.762	-16.567	-15.968	-14.962	-13.545	-11.714	-9.464	-6.794	-3.701	-0.186	2.775	4.721	4.642	0.887	-8.164	-23.059	-42.83
2-amino-1-butanol	96-20-8		-600.932	-567.949	-534.475	-500.549	-466.228	-431.584	-396.716	-361.753	-326.863	-292.254	-258.175	-224.903	-192.72	-161.887	-132.633	-105.174	-79.784	-56.905	-37.217	-21.538	-10.451	-3.877	-1.009	-2.642	-5.169	-7.505	-9.604	-11.421	-12.917	-14.054	-14.804	-15.139	-15.037	-14.479	-13.453	-11.945	-9.947	-7.452	-4.455	-0.952	2.646	6.484	10.567	14.792	19.012	23.015	26.507
2-bromo-2-chloro-1,1,1-trifluoroethane	151-67-7		244.949	226.886	209.476	192.716	176.608	161.15	146.341	132.181	118.668	105.802	93.581	82.004	71.07	60.777	51.123	42.106	33.724	25.975	18.855	12.36	6.488	1.233	-3.411	-7.448	-10.888	-13.738	-16.009	-17.714	-18.866	-19.484	-19.587	-19.2	-18.35	-17.07	-15.397	-13.37	-11.036	-8.44	-5.632	-2.657	-1.694	-2.17	-3.854	-6.738	-10.678	-15.43	-20.713
2-bromo-2-methylpropane	507-19-7		184.456	170.154	156.458	143.363	130.863	118.951	107.619	96.859	86.661	77.016	67.913	59.34	51.285	43.734	36.674	30.092	23.973	18.303	13.071	8.263	3.871	-0.117	-3.705	-6.898	-9.699	-12.106	-14.116	-15.725	-16.923	-17.702	-18.051	-17.957	-17.409	-16.392	-14.894	-12.902	-10.404	-7.387	-3.84	0.246	4.883	10.077	15.839	22.174	29.09	36.592	44.685
2-bromobutane	78-76-2		194.909	180.133	165.956	152.373	139.379	126.967	115.13	103.861	93.151	82.994	73.379	64.297	55.739	47.694	40.152	33.105	26.54	20.449	14.824	9.655	4.935	0.659	-3.177	-6.579	-9.546	-12.079	-14.176	-15.836	-17.052	-17.819	-18.132	-17.981	-17.361	-16.261	-14.673	-12.588	-9.998	-6.893	-3.267	0.89	5.584	10.822	16.611	22.958	29.867	37.344	45.394
2-bromoethanol	540-51-2		-204.851	-195.433	-185.459	-174.942	-163.898	-152.349	-140.318	-127.842	-114.968	-101.765	-88.332	-74.814	-61.424	-48.461	-36.321	-25.481	-16.419	-9.492	-4.805	-2.172	-1.199	-1.413	-2.381	-4.432	-6.516	-8.307	-9.814	-11.047	-12.01	-12.707	-13.139	-13.302	-13.19	-12.794	-12.103	-11.103	-9.777	-8.108	-6.08	-3.674	-1.972	-0.821	-0.429	-1.333	-4.176	-9.574	-17.892
2-bromopentane	107-81-3		199.119	184.25	169.971	156.276	143.158	130.612	118.63	107.204	96.328	85.992	76.188	66.908	58.144	49.886	42.127	34.857	28.071	21.76	15.919	10.542	5.626	1.167	-2.837	-6.386	-9.479	-12.115	-14.29	-16.002	-17.244	-18.012	-18.299	-18.099	-17.405	-16.21	-14.507	-12.288	-9.548	-6.279	-2.475	1.869	6.76	12.202	18.2	24.76	31.885	39.58	47.848
2-bromoethanolacetate	927-68-4		-120.589	-116.821	-112.544	-107.768	-102.508	-96.78	-90.605	-84.009	-77.027	-69.706	-62.108	-54.318	-46.45	-38.652	-31.111	-24.052	-17.721	-12.356	-8.142	-5.171	-3.419	-2.755	-2.972	-4.835	-6.97	-8.89	-10.587	-12.051	-13.268	-14.222	-14.898	-15.277	-15.338	-15.063	-14.432	-13.425	-12.023	-10.207	-7.96	-5.267	-2.312	1.04	4.839	9.095	13.818	19.016	24.696
2-butanethiol	513-53-1		28.288	25.262	22.727	20.66	19.029	17.798	16.922	16.347	16.008	15.83	15.729	15.611	15.379	14.941	14.215	13.142	11.69	9.862	7.692	5.244	2.598	-0.153	-2.916	-6.034	-8.963	-11.491	-13.607	-15.299	-16.555	-17.363	-17.71	-17.586	-16.98	-15.882	-14.283	-12.174	-9.548	-6.399	-2.722	1.489	6.079	11.122	16.64	22.622	29.055	35.925	43.216
2-bromopyridine	109-04-6		-262.646	-249.755	-236.379	-222.532	-208.228	-193.487	-178.329	-162.782	-146.881	-130.678	-114.243	-97.688	-81.182	-64.988	-49.501	-35.27	-22.965	-13.235	-6.462	-2.582	-1.111	-1.365	-2.688	-5.221	-7.763	-9.962	-11.815	-13.318	-14.467	-15.261	-15.697	-15.771	-15.481	-14.823	-13.794	-12.388	-10.6	-8.424	-5.853	-2.879	0.272	3.747	7.602	11.844	16.483	21.528	26.991
2-butanoneoxime	96-29-7		-216.784	-203.978	-190.705	-177.012	-162.958	-148.615	-134.076	-119.454	-104.882	-90.523	-76.559	-63.197	-50.656	-39.164	-28.938	-20.173	-13.016	-7.538	-3.721	-1.444	-0.503	-0.638	-1.572	-4.113	-6.83	-9.196	-11.197	-12.816	-14.037	-14.843	-15.217	-15.145	-14.612	-13.605	-12.115	-10.132	-7.65	-4.663	-1.17	2.828	6.203	8.761	9.891	8.531	3.584	-5.591	-18.794
2-butoxyethanol	111-76-2		-313.245	-300.26	-286.769	-272.779	-258.299	-243.337	-227.906	-212.021	-195.702	-178.973	-161.869	-144.438	-126.748	-108.905	-91.07	-73.499	-56.585	-40.904	-27.2	-16.246	-8.567	-4.166	-2.516	-4.536	-7.236	-9.674	-11.805	-13.589	-14.988	-15.969	-16.503	-16.566	-16.137	-15.199	-13.736	-11.738	-9.194	-6.097	-2.44	1.781	6.296	11.129	16.203	21.328	26.211	30.421	33.374
2-bromothiophene	1003-09-4		219.175	203.067	187.551	172.628	158.296	144.553	131.397	118.827	106.84	95.436	84.61	74.361	64.686	55.581	47.044	39.069	31.654	24.793	18.482	12.715	7.486	2.789	-1.383	-5.037	-8.181	-10.823	-12.971	-14.635	-15.823	-16.544	-16.807	-16.621	-15.995	-14.936	-13.451	-11.547	-9.228	-6.499	-3.362	0.182	3.816	7.711	11.92	16.441	21.272	26.416	31.874
2-butoxyethanolacetate	112-07-2		-204.391	-197.146	-189.404	-181.174	-172.47	-163.303	-153.689	-143.647	-133.198	-122.37	-111.2	-99.734	-88.038	-76.208	-64.379	-52.744	-41.574	-31.22	-22.096	-14.618	-9.088	-5.593	-3.968	-5.602	-7.949	-10.11	-12.043	-13.708	-15.065	-16.077	-16.709	-16.93	-16.712	-16.033	-14.87	-13.208	-11.031	-8.327	-5.085	-1.296	3.042	7.938	13.399	19.43	26.033	33.213	40.971
2-butylbenzene	135-98-8		211.002	195.643	180.855	166.634	152.974	139.87	127.318	115.313	103.849	92.921	82.525	72.656	63.309	54.48	46.165	38.361	31.064	24.271	17.981	12.192	6.902	2.111	-2.18	-5.973	-9.264	-12.054	-14.339	-16.118	-17.389	-18.147	-18.391	-18.116	-17.319	-15.997	-14.146	-11.762	-8.841	-5.381	-1.377	3.174	8.276	13.931	20.144	26.916	34.251	42.151	50.62
2-butylphenol	3180-09-04		53.331	51.452	49.923	48.682	47.655	46.756	45.881	44.92	43.757	42.283	40.409	38.074	35.261	31.993	28.33	24.363	20.197	15.941	11.698	7.559	3.603	-0.104	-3.513	-6.755	-9.615	-12.015	-13.955	-15.436	-16.459	-17.027	-17.141	-16.804	-16.02	-14.795	-13.136	-11.051	-8.551	-5.65	-2.364	1.289	2.98	1.951	-3.075	-13.407	-29.176	-49.248	-72.06
2-butyn-1-ol	764-01-2		-229.514	-218.949	-207.856	-196.247	-184.139	-171.553	-158.515	-145.057	-131.223	-117.074	-102.693	-88.203	-73.78	-59.673	-46.23	-33.889	-23.148	-14.456	-8.081	-4.004	-1.933	-1.412	-1.966	-4.011	-6.226	-8.189	-9.897	-11.342	-12.512	-13.394	-13.974	-14.233	-14.155	-13.721	-12.912	-11.711	-10.1	-8.062	-5.585	-2.653	-0.087	2.109	3.648	3.93	2.203	-2.276	-9.964
2-chloro-1,3,5-trimethylbenzene	1667-04-5		221.572	205.41	189.84	174.861	160.469	146.661	133.434	120.784	108.709	97.204	86.266	75.892	66.077	56.818	48.112	39.954	32.34	25.268	18.733	12.733	7.265	2.324	-2.09	-5.98	-9.349	-12.197	-14.525	-16.336	-17.627	-18.4	-18.654	-18.388	-17.601	-16.291	-14.456	-12.093	-9.2	-5.775	-1.815	2.685	7.727	13.313	19.449	26.137	33.38	41.182	49.546
2-chloro-2-fluoropropane	420-44-0		195.992	180.551	165.747	151.578	138.04	125.129	112.841	101.172	90.117	79.668	69.821	60.567	51.898	43.805	36.277	29.305	22.876	16.977	11.595	6.716	2.323	-1.596	-5.059	-8.078	-10.668	-12.842	-14.609	-15.98	-16.96	-17.552	-17.758	-17.576	-16.999	-16.022	-14.635	-12.825	-10.581	-7.888	-4.732	-1.1	3.022	7.649	12.794	18.469	24.687	31.458	38.792
2-chloro-2-propenenitrile	920-37-6		-14.046	-15.174	-15.783	-15.892	-15.525	-14.712	-13.493	-11.914	-10.036	-7.931	-5.69	-3.416	-1.228	0.746	2.38	3.562	4.208	4.275	3.769	2.742	1.281	-0.502	-2.488	-5.046	-7.528	-9.699	-11.549	-13.069	-14.252	-15.09	-15.574	-15.698	-15.456	-14.845	-13.859	-12.495	-10.75	-8.621	-6.106	-3.201	-0.642	1.943	4.676	7.547	10.554	13.702	17.002
2-chloro-2-methylbutane	594-36-5		192.113	177.572	163.628	150.276	137.507	125.315	113.691	102.627	92.113	82.14	72.696	63.771	55.354	47.433	39.999	33.039	26.543	20.503	14.909	9.756	5.037	0.749	-3.111	-6.544	-9.548	-12.115	-14.242	-15.922	-17.146	-17.906	-18.193	-17.995	-17.304	-16.108	-14.398	-12.163	-9.395	-6.084	-2.223	2.198	7.185	12.744	18.882	25.605	32.917	40.823	49.327
2-chloroaniline	95-51-2		-112.851	-106.015	-98.651	-90.778	-82.424	-73.626	-64.442	-54.952	-45.277	-35.592	-26.141	-17.252	-9.323	-2.771	2.059	5.006	6.147	5.771	4.278	2.073	-0.501	-3.179	-5.779	-8.421	-10.743	-12.636	-14.115	-15.192	-15.882	-16.201	-16.163	-15.784	-15.078	-14.059	-12.737	-11.125	-9.231	-7.06	-4.618	-1.905	0.128	1.866	3.427	4.773	5.879	6.744	7.385
2-chloroethanol	107-07-3		-212.701	-203.302	-193.332	-182.805	-171.736	-160.145	-148.058	-135.505	-122.534	-109.206	-95.613	-81.888	-68.225	-54.898	-42.281	-30.832	-21.04	-13.307	-7.811	-4.443	-2.852	-2.578	-3.174	-5.025	-6.961	-8.615	-9.999	-11.121	-11.987	-12.602	-12.965	-13.072	-12.915	-12.483	-11.762	-10.735	-9.384	-7.687	-5.626	-3.181	-1.335	0.049	0.778	0.342	-1.887	-6.545	-14.063
2-chloroanisole	766-51-8		69.551	65.413	61.69	58.328	55.268	52.438	49.76	47.149	44.52	41.794	38.905	35.804	32.471	28.913	25.159	21.263	17.29	13.31	9.395	5.61	2.013	-1.348	-4.434	-7.412	-10.053	-12.274	-14.082	-15.485	-16.488	-17.096	-17.311	-17.135	-16.567	-15.606	-14.246	-12.484	-10.31	-7.717	-4.696	-1.235	2.624	6.923	11.683	16.915	22.63	28.836	35.545
2-chlorobutane	78-86-4		194.597	179.809	165.624	152.036	139.04	126.628	114.794	103.53	92.827	82.678	73.072	64	55.452	47.418	39.887	32.849	26.295	20.213	14.597	9.436	4.726	0.459	-3.368	-6.757	-9.711	-12.227	-14.304	-15.939	-17.125	-17.857	-18.127	-17.928	-17.251	-16.086	-14.426	-12.26	-9.581	-6.379	-2.646	1.626	6.444	11.814	17.744	24.239	31.305	38.947	47.169
2-chloroethylethylether	628-34-2		-220.071	-210.529	-200.463	-189.883	-178.803	-167.236	-155.201	-142.721	-129.829	-116.57	-103.012	-89.256	-75.453	-61.826	-48.696	-36.489	-25.716	-16.883	-10.341	-6.158	-4.085	-3.668	-4.395	-6.674	-9.096	-11.213	-13.017	-14.498	-15.644	-16.44	-16.873	-16.926	-16.584	-15.831	-14.652	-13.031	-10.955	-8.41	-5.384	-1.865	2.088	6.524	11.466	16.919	22.89	29.384	36.406
2-chloropropionicacid	598-87-7		-13.129	-13.811	-14.099	-14.014	-13.579	-12.825	-11.787	-10.511	-9.049	-7.465	-5.836	-4.242	-2.773	-1.516	-0.55	0.062	0.283	0.104	-0.453	-1.337	-2.481	-3.803	-5.222	-7.217	-9.131	-10.713	-11.967	-12.898	-13.51	-13.803	-13.779	-13.439	-12.782	-11.806	-10.51	-8.891	-6.949	-4.682	-2.089	0.828	1.867	0.268	-5.514	-17.314	-35.675	-59.386	-86.495
2-chloropentane	625-29-6		198.514	183.656	169.392	155.714	142.618	130.096	118.14	106.743	95.896	85.591	75.82	66.572	57.839	49.612	41.882	34.641	27.88	21.593	15.774	10.417	5.518	1.075	-2.914	-6.449	-9.528	-12.15	-14.31	-16.004	-17.227	-17.971	-18.23	-17.998	-17.265	-16.026	-14.273	-11.997	-9.192	-5.852	-1.97	2.461	7.446	12.991	19.1	25.777	33.028	40.856	49.264
2-chloropyridine	109-09-1		-290.2	-276.509	-262.293	-247.567	-232.343	-216.638	-200.473	-183.872	-166.87	-149.511	-131.859	-114.013	-96.124	-78.428	-61.296	-45.268	-31.057	-19.435	-10.97	-5.757	-3.361	-3.039	-4.029	-6.463	-8.958	-11.111	-12.916	-14.367	-15.459	-16.189	-16.552	-16.545	-16.165	-15.409	-14.272	-12.752	-10.843	-8.539	-5.835	-2.722	0.587	4.228	8.252	12.667	17.482	22.705	28.348
2-chlorothiophene	96-43-5		221.792	205.44	189.688	174.535	159.98	146.022	132.659	119.889	107.711	96.123	85.122	74.707	64.874	55.62	46.944	38.84	31.305	24.335	17.926	12.072	6.769	2.009	-2.213	-5.905	-9.072	-11.725	-13.87	-15.516	-16.672	-17.347	-17.551	-17.293	-16.581	-15.424	-13.83	-11.807	-9.361	-6.496	-3.216	0.475	4.269	8.327	12.7	17.384	22.376	27.678	33.291
2-cyclohexen-1-one	930-68-7		-284.669	-274.12	-263.033	-251.419	-239.291	-226.663	-213.552	-199.979	-185.966	-171.542	-156.743	-141.612	-126.206	-110.603	-94.913	-79.299	-63.999	-49.362	-35.868	-24.106	-14.668	-7.955	-3.998	-4.719	-6.652	-8.594	-10.481	-12.247	-13.826	-15.156	-16.18	-16.849	-17.121	-16.958	-16.331	-15.215	-13.59	-11.439	-8.748	-5.507	-1.71	2.652	7.587	13.101	19.198	25.882	33.156
2-decenal	3913-71-1		-224.039	-215.819	-207.055	-197.759	-187.944	-177.624	-166.817	-155.542	-143.824	-131.694	-119.191	-106.368	-93.301	-80.101	-66.93	-54.027	-41.732	-30.494	-20.836	-13.244	-8.014	-5.118	-4.211	-6.182	-8.703	-10.998	-13.017	-14.71	-16.036	-16.957	-17.441	-17.46	-16.993	-16.02	-14.527	-12.503	-9.938	-6.825	-3.158	1.067	5.847	11.187	17.091	23.56	30.595	38.197	46.365
2-cyclopentylcyclopentanone	4884-24-6		-217.369	-209.13	-200.385	-191.151	-181.441	-171.275	-160.671	-149.652	-138.244	-126.48	-114.399	-102.054	-89.519	-76.899	-64.345	-52.08	-40.414	-29.753	-20.567	-13.295	-8.214	-5.32	-4.324	-6.236	-8.721	-10.983	-12.971	-14.639	-15.944	-16.847	-17.314	-17.317	-16.831	-15.837	-14.316	-12.255	-9.643	-6.47	-2.729	1.586	6.481	11.96	18.025	24.68	31.927	39.767	48.203
2-dimethylaminoacetonitrile	926-64-7		-313.827	-298.136	-281.953	-265.309	-248.238	-230.783	-212.995	-194.94	-176.693	-158.352	-140.031	-121.874	-104.054	-86.783	-70.32	-54.973	-41.095	-29.049	-19.154	-11.6	-6.38	-3.283	-1.943	-3.383	-5.45	-7.41	-9.237	-10.9	-12.367	-13.6	-14.564	-15.226	-15.552	-15.514	-15.086	-14.245	-12.972	-11.25	-9.065	-6.404	-3.549	-0.331	3.306	7.362	11.836	16.727	22.035
2-ethoxyaniline	94-70-2		-254.226	-240.441	-226.154	-211.38	-196.134	-180.436	-164.313	-147.801	-130.953	-113.853	-96.628	-79.485	-62.743	-46.874	-32.518	-20.407	-11.159	-5.017	-1.729	-0.682	-1.16	-2.547	-4.389	-6.812	-9.117	-11.092	-12.736	-14.049	-15.028	-15.669	-15.966	-15.911	-15.497	-14.717	-13.561	-12.021	-10.091	-7.762	-5.028	-1.884	1.174	4.344	7.674	11.115	14.619	18.135	21.623
2-ethenyl-1,3,5-trimethylbenzene	769-25-5		207.41	192.141	177.453	163.34	149.799	136.824	124.411	112.552	101.244	90.481	80.255	70.563	61.397	52.751	44.621	37	29.884	23.267	17.146	11.516	6.375	1.719	-2.453	-6.142	-9.349	-12.072	-14.311	-16.062	-17.324	-18.094	-18.367	-18.14	-17.407	-16.164	-14.407	-12.129	-9.325	-5.99	-2.12	2.292	7.251	12.761	18.827	25.454	32.645	40.405	48.739
2-ethoxyethanolacetate	111-15-9		-204.483	-197.498	-189.991	-181.974	-173.463	-164.475	-155.029	-145.147	-134.855	-124.184	-113.172	-101.868	-90.336	-78.663	-66.969	-55.424	-44.261	-33.784	-24.364	-16.395	-10.209	-5.974	-3.634	-4.898	-7.045	-9.081	-10.967	-12.66	-14.114	-15.285	-16.13	-16.609	-16.687	-16.333	-15.518	-14.22	-12.418	-10.096	-7.238	-3.834	0.123	4.643	9.736	15.407	21.661	28.502	35.935
2-ethoxyethylacrylate	106-74-1		-218.469	-206.975	-195.618	-184.357	-173.144	-161.935	-150.685	-139.361	-127.94	-116.412	-104.785	-93.083	-81.361	-69.704	-58.242	-47.165	-36.728	-27.248	-19.076	-12.529	-7.805	-4.911	-3.654	-5.35	-7.678	-9.809	-11.712	-13.355	-14.704	-15.727	-16.395	-16.679	-16.553	-15.994	-14.982	-13.498	-11.528	-9.057	-6.074	-2.567	1.442	5.98	11.057	16.679	22.852	29.578	36.863
2-ethyl-1,3-hexanediol	94-96-2		-334.715	-318.777	-302.363	-285.49	-268.181	-250.46	-232.356	-213.901	-195.135	-176.105	-156.87	-137.506	-118.12	-98.866	-79.977	-61.812	-44.902	-29.961	-17.782	-8.974	-3.66	-1.383	-1.336	-3.92	-6.851	-9.436	-11.643	-13.441	-14.804	-15.71	-16.137	-16.07	-15.495	-14.401	-12.779	-10.622	-7.925	-4.685	-0.901	3.429	7.924	12.555	17.145	21.312	24.481	25.866	24.583
2-ethyl-1-butanol	97-95-0		-273.538	-261.018	-247.974	-234.42	-220.372	-205.849	-190.872	-175.466	-159.661	-143.496	-127.024	-110.319	-93.492	-76.718	-60.273	-44.578	-30.244	-18.03	-8.673	-2.588	0.361	0.796	-0.466	-3.607	-6.855	-9.682	-12.061	-13.967	-15.379	-16.282	-16.66	-16.502	-15.801	-14.549	-12.742	-10.377	-7.455	-3.975	0.059	4.645	9.12	13.461	17.421	20.488	21.991	21.189	17.493
2-ethyl-1,3-dimethylbenzene	2870-04-04		198.054	183.494	169.499	156.063	143.179	130.84	119.039	107.767	97.018	86.782	77.053	67.823	59.084	50.828	43.05	35.743	28.903	22.524	16.604	11.141	6.133	1.581	-2.514	-6.15	-9.324	-12.03	-14.265	-16.023	-17.296	-18.08	-18.366	-18.149	-17.42	-16.174	-14.402	-12.099	-9.258	-5.873	-1.939	2.551	7.601	13.215	19.399	26.157	33.492	41.408	49.908
2-ethyl-1-butene	760-21-4		163.775	153.158	142.966	133.172	123.745	114.656	105.876	97.377	89.132	81.12	73.325	65.737	58.353	51.176	44.218	37.494	31.027	24.841	18.964	13.423	8.249	3.468	-0.893	-4.943	-8.528	-11.579	-14.089	-16.052	-17.459	-18.306	-18.584	-18.288	-17.413	-15.952	-13.901	-11.256	-8.012	-4.164	0.289	5.353	11.029	17.321	24.231	31.762	39.915	48.693	58.097
2-ethyl-1,4-dimethylbenzene	1758-88-9		201.865	187.113	172.925	159.295	146.218	133.684	121.689	110.225	99.284	88.859	78.943	69.53	60.612	52.184	44.239	36.773	29.782	23.262	17.21	11.627	6.51	1.861	-2.319	-6.027	-9.26	-12.013	-14.283	-16.063	-17.348	-18.131	-18.408	-18.17	-17.412	-16.128	-14.311	-11.955	-9.055	-5.606	-1.601	2.964	8.094	13.793	20.064	26.913	34.342	42.355	50.954
2-ethyl-hexanal	123-05-7		-159.477	-154.308	-148.592	-142.342	-135.573	-128.299	-120.539	-112.317	-103.66	-94.605	-85.199	-75.507	-65.619	-55.661	-45.808	-36.298	-27.437	-19.582	-13.095	-8.259	-5.191	-3.796	-3.799	-6.033	-8.653	-11.015	-13.075	-14.79	-16.123	-17.036	-17.501	-17.489	-16.978	-15.948	-14.383	-12.27	-9.598	-6.357	-2.54	1.859	6.844	12.421	18.591	25.359	32.725	40.692	49.261
2-ethyl-hexanoicacid	149-57-5		-98.347	-94.944	-91.079	-86.763	-82.009	-76.832	-71.252	-65.293	-58.988	-52.383	-45.543	-38.557	-31.546	-24.676	-18.156	-12.238	-7.19	-3.257	-0.603	0.731	0.847	-0.039	-1.654	-4.536	-7.476	-10.039	-12.198	-13.925	-15.198	-15.995	-16.299	-16.095	-15.371	-14.117	-12.327	-9.995	-7.12	-3.701	0.259	4.755	8.872	12.234	13.94	12.412	5.885	-6.595	-24.432
2-ethylbenzeneamine	578-54-1		-207.922	-196.792	-185.103	-172.869	-160.108	-146.842	-133.104	-118.939	-104.416	-89.636	-74.759	-60.027	-45.8	-32.579	-20.98	-11.623	-4.927	-0.933	0.714	0.603	-0.656	-2.558	-4.737	-7.281	-9.631	-11.62	-13.25	-14.521	-15.435	-15.99	-16.186	-16.019	-15.49	-14.594	-13.332	-11.7	-9.698	-7.324	-4.579	-1.461	1.371	4.179	7.031	9.882	12.692	15.431	18.086
2-ethylbutyraldehyde	97-96-1		-164.036	-158.821	-153.071	-146.8	-140.023	-132.755	-125.016	-116.828	-108.219	-99.222	-89.882	-80.255	-70.421	-60.488	-50.606	-40.977	-31.868	-23.602	-16.527	-10.953	-7.066	-4.869	-4.171	-6.047	-8.459	-10.675	-12.651	-14.338	-15.693	-16.675	-17.245	-17.37	-17.022	-16.177	-14.814	-12.915	-10.467	-7.457	-3.877	0.283	5.029	10.366	16.298	22.83	29.965	37.704	46.05
2-ethylbutyricacid	88-09-5		-104.22	-100.896	-97.107	-92.865	-88.182	-83.072	-77.552	-71.646	-65.384	-58.805	-51.966	-44.943	-37.84	-30.799	-24.004	-17.678	-12.075	-7.443	-3.983	-1.793	-0.845	-0.985	-1.977	-4.526	-7.25	-9.646	-11.683	-13.332	-14.566	-15.362	-15.697	-15.554	-14.917	-13.773	-12.114	-9.931	-7.22	-3.98	-0.211	4.083	7.911	10.905	12.165	10.132	3.118	-9.726	-27.765
2-ethylhexylamine	104-75-6		-770.652	-734.893	-698.58	-661.727	-624.349	-586.467	-548.103	-509.284	-470.04	-430.411	-390.441	-350.184	-309.709	-269.1	-228.472	-187.995	-147.974	-109.034	-72.542	-41.201	-18.679	-6.707	-2.932	-5.116	-8.089	-10.741	-13.014	-14.862	-16.247	-17.142	-17.524	-17.379	-16.694	-15.46	-13.674	-11.332	-8.433	-4.978	-0.968	3.593	8.547	13.956	19.835	26.165	32.926	40.099	47.662
2-ethylhexanethiol	7341-17-5		58.681	54.998	51.767	48.954	46.517	44.405	42.557	40.903	39.359	37.836	36.238	34.472	32.452	30.116	27.427	24.381	21.009	17.371	13.55	9.638	5.731	1.923	-1.703	-5.349	-8.657	-11.485	-13.825	-15.665	-16.997	-17.812	-18.103	-17.862	-17.084	-15.763	-13.895	-11.475	-8.501	-4.97	-0.881	3.768	8.856	14.434	20.511	27.073	34.105	41.586	49.494
2-ethylpyridine	100-71-0		-513.683	-490.06	-465.915	-441.26	-416.105	-390.464	-364.35	-337.783	-310.784	-283.381	-255.61	-227.519	-199.178	-170.694	-142.24	-114.118	-86.866	-61.428	-39.26	-22.07	-10.915	-5.362	-3.819	-5.963	-8.628	-10.989	-13.018	-14.688	-15.975	-16.859	-17.322	-17.349	-16.928	-16.047	-14.698	-12.87	-10.558	-7.755	-4.454	-0.649	3.648	8.452	13.771	19.611	25.973	32.865	40.288
2-ethylstyrene	7564-63-8		205.752	190.409	175.658	161.495	147.915	134.915	122.489	110.633	99.341	88.607	78.426	68.792	59.698	51.139	43.107	35.596	28.599	22.111	16.124	10.633	5.633	1.119	-2.915	-6.472	-9.555	-12.166	-14.307	-15.979	-17.181	-17.913	-18.172	-17.957	-17.263	-16.088	-14.426	-12.273	-9.624	-6.473	-2.816	1.355	6.044	11.258	17.001	23.28	30.1	37.465	45.381
2-fluoroanisole	321-28-8		46.505	42.98	39.942	37.35	35.155	33.299	31.71	30.31	29.009	27.714	26.335	24.788	23.008	20.955	18.618	16.014	13.188	10.202	7.128	4.041	1.011	-1.898	-4.631	-7.426	-9.952	-12.087	-13.839	-15.213	-16.213	-16.843	-17.103	-16.99	-16.502	-15.633	-14.374	-12.716	-10.649	-8.161	-5.238	-1.869	1.908	6.138	10.842	16.032	21.72	27.916	34.63
2-fluorobenzaldehyde	446-52-6		-133.519	-128.429	-122.868	-116.856	-110.412	-103.562	-96.333	-88.759	-80.88	-72.747	-64.428	-56.006	-47.597	-39.348	-31.446	-24.117	-17.61	-12.167	-7.978	-5.131	-3.59	-3.197	-3.718	-5.878	-8.276	-10.412	-12.267	-13.821	-15.055	-15.952	-16.496	-16.67	-16.461	-15.855	-14.842	-13.409	-11.548	-9.248	-6.5	-3.296	0.233	4.175	8.565	13.408	18.71	24.476	30.712
2-fluoroethanol	371-62-0		-234.331	-224.187	-213.471	-202.199	-190.386	-178.053	-165.228	-151.944	-138.248	-124.203	-109.895	-95.446	-81.027	-66.871	-53.287	-40.653	-29.389	-19.881	-12.384	-6.949	-3.413	-1.465	-0.742	-2.121	-3.942	-5.629	-7.189	-8.62	-9.91	-11.041	-11.985	-12.713	-13.191	-13.382	-13.251	-12.764	-11.889	-10.595	-8.857	-6.652	-4.784	-3.163	-1.977	-1.694	-2.931	-6.361	-12.528
2-fluorotoluene	95-52-3		210.595	194.751	179.518	164.892	150.869	137.447	124.623	112.391	100.747	89.688	79.208	69.303	59.966	51.191	42.973	35.306	28.181	21.593	15.535	9.998	4.976	0.461	-3.553	-7.074	-10.108	-12.661	-14.739	-16.346	-17.485	-18.161	-18.375	-18.127	-17.418	-16.247	-14.611	-12.508	-9.932	-6.881	-3.348	0.672	5.161	10.139	15.617	21.602	28.099	35.115	42.656
2-heptanone	110-43-0		-242.989	-234.188	-224.833	-214.935	-204.507	-193.565	-182.125	-170.209	-157.842	-145.053	-131.879	-118.372	-104.598	-90.654	-76.682	-62.89	-49.582	-37.176	-26.193	-17.18	-10.554	-6.434	-4.577	-6.175	-8.517	-10.691	-12.639	-14.308	-15.65	-16.62	-17.179	-17.295	-16.941	-16.093	-14.733	-12.845	-10.418	-7.441	-3.906	0.192	4.859	10.1	15.917	22.313	29.291	36.852	45
2-furancarbonylchloride	527-69-5		132.283	122.141	112.453	103.206	94.385	85.976	77.964	70.336	63.077	56.174	49.615	43.389	37.487	31.9	26.623	21.65	16.98	12.611	8.542	4.777	1.318	-1.832	-4.669	-7.312	-9.637	-11.595	-13.19	-14.427	-15.309	-15.841	-16.024	-15.862	-15.357	-14.511	-13.325	-11.799	-9.933	-7.725	-5.173	-2.273	0.215	2.665	5.201	7.81	10.488	13.235	16.064
2-hexanone	591-78-6		-243.159	-234.303	-224.92	-215.023	-204.622	-193.735	-182.376	-170.565	-158.324	-145.682	-132.673	-119.34	-105.746	-91.977	-78.163	-64.494	-51.249	-38.816	-27.689	-18.406	-11.409	-6.874	-4.631	-6.029	-8.257	-10.353	-12.26	-13.924	-15.292	-16.317	-16.957	-17.175	-16.941	-16.229	-15.018	-13.29	-11.032	-8.232	-4.88	-0.969	3.508	8.555	14.177	20.377	27.158	34.524	42.476
2-hexanethiol	1679-06-7		30.607	27.815	25.521	23.701	22.32	21.339	20.707	20.362	20.23	20.223	20.238	20.168	19.897	19.322	18.355	16.942	15.067	12.755	10.072	7.109	3.972	0.774	-2.38	-5.759	-8.881	-11.563	-13.793	-15.559	-16.849	-17.652	-17.958	-17.758	-17.042	-15.804	-14.036	-11.733	-8.889	-5.501	-1.565	2.922	7.838	13.24	19.14	25.53	32.397	39.725	47.499
2-hexyloxyethanol	112-25-4		-303.672	-291.447	-278.655	-265.306	-251.41	-236.978	-222.027	-206.572	-190.635	-174.243	-157.433	-140.253	-122.778	-105.117	-87.445	-70.039	-53.33	-37.943	-24.675	-14.319	-7.347	-3.652	-2.602	-4.887	-7.728	-10.264	-12.454	-14.26	-15.647	-16.586	-17.051	-17.021	-16.479	-15.408	-13.797	-11.635	-8.915	-5.63	-1.775	2.655	7.442	12.612	18.116	23.817	29.51	34.895	39.554
2-hydroxy-2-methylpropanenitrile	75-86-5		-102.479	-99.981	-96.931	-93.346	-89.242	-84.642	-79.572	-74.066	-68.166	-61.923	-55.404	-48.693	-41.892	-35.13	-28.557	-22.346	-16.681	-11.742	-7.68	-4.595	-2.513	-1.389	-1.11	-2.654	-4.594	-6.392	-8.036	-9.508	-10.782	-11.83	-12.622	-13.126	-13.311	-13.148	-12.609	-11.672	-10.314	-8.519	-6.272	-3.562	-1.321	0.273	0.642	-1.277	-6.73	-16.65	-31.094
2-hexyne	764-35-2		152.495	140.959	129.948	119.449	109.449	99.933	90.884	82.286	74.121	66.372	59.02	52.046	45.435	39.169	33.234	27.617	22.31	17.305	12.601	8.196	4.095	0.306	-3.162	-6.498	-9.497	-12.065	-14.196	-15.882	-17.115	-17.885	-18.183	-17.998	-17.32	-16.138	-14.444	-12.226	-9.477	-6.188	-2.351	2.042	6.997	12.521	18.618	25.294	32.555	40.403	48.842
2-hydroxy-benzoicacidmethylester	119-36-8		-33.511	-33.972	-33.89	-33.281	-32.165	-30.565	-28.516	-26.056	-23.241	-20.137	-16.831	-13.431	-10.064	-6.879	-4.035	-1.686	0.038	1.051	1.33	0.914	-0.099	-1.575	-3.367	-6.021	-8.644	-10.906	-12.803	-14.329	-15.48	-16.249	-16.629	-16.613	-16.193	-15.359	-14.104	-12.417	-10.291	-7.714	-4.679	-1.174	2.712	7.045	11.847	17.125	22.881	29.118	35.836
2-hydroxy-propanoicacid-methylester	547-64-8		-245.318	-234.977	-224.163	-212.885	-201.155	-188.989	-176.409	-163.443	-150.126	-136.506	-122.645	-108.623	-94.546	-80.557	-66.841	-53.642	-41.269	-30.086	-20.474	-12.762	-7.134	-3.565	-1.824	-3.289	-5.498	-7.575	-9.491	-11.212	-12.701	-13.92	-14.833	-15.404	-15.6	-15.392	-14.752	-13.658	-12.088	-10.025	-7.452	-4.357	-1.052	2.54	6.375	10.295	14.059	17.312	19.576
2-hydroxypropanenitrile	78-97-7		-104.166	-101.25	-97.808	-93.859	-89.421	-84.52	-79.184	-73.451	-67.366	-60.985	-54.379	-47.635	-40.859	-34.179	-27.74	-21.704	-16.234	-11.48	-7.56	-4.54	-2.426	-1.163	-0.646	-1.864	-3.453	-4.9	-6.208	-7.373	-8.386	-9.231	-9.888	-10.334	-10.545	-10.495	-10.16	-9.516	-8.541	-7.218	-5.529	-3.46	-2.403	-2.351	-3.818	-7.828	-15.471	-27.428	-43.562
2-iodopropane	75-30-9		193.271	178.596	164.519	151.037	138.143	125.832	114.098	102.935	92.335	82.29	72.791	63.83	55.396	47.479	40.069	33.154	26.724	20.767	15.273	10.231	5.631	1.465	-2.274	-5.593	-8.495	-10.984	-13.059	-14.72	-15.964	-16.786	-17.181	-17.14	-16.655	-15.717	-14.317	-12.445	-10.09	-7.243	-3.894	-0.033	4.346	9.252	14.694	20.679	27.214	34.305	41.956
2-isopropoxyethanol	109-59-1		-361.169	-343.872	-326.282	-308.426	-290.329	-272.014	-253.503	-234.815	-215.969	-196.986	-177.887	-158.705	-139.485	-120.301	-101.272	-82.597	-64.592	-47.744	-32.721	-20.291	-11.087	-5.3	-2.564	-4.151	-6.645	-8.948	-11.011	-12.787	-14.233	-15.307	-15.975	-16.204	-15.969	-15.247	-14.018	-12.268	-9.983	-7.153	-3.769	0.175	4.418	8.992	13.831	18.763	23.516	27.684	30.704
2-isopropyl-6-methylphenol	3228-04-04		64.052	60.649	57.634	54.956	52.555	50.36	48.292	46.265	44.189	41.977	39.555	36.865	33.878	30.59	27.029	23.245	19.308	15.294	11.284	7.354	3.573	0	-3.312	-6.535	-9.412	-11.844	-13.831	-15.373	-16.467	-17.113	-17.309	-17.056	-16.351	-15.196	-13.592	-11.54	-9.044	-6.107	-2.736	1.062	3.714	4.764	3.234	-2.248	-12.588	-27.62	-46.243
2-methoxy-4-(1-propenyl)phenol	97-54-1		-15.731	-14.615	-13.111	-11.239	-9.028	-6.52	-3.774	-0.868	2.097	4.994	7.676	9.98	11.747	12.843	13.178	12.733	11.554	9.746	7.454	4.834	2.039	-0.799	-3.567	-6.465	-9.103	-11.349	-13.203	-14.667	-15.741	-16.424	-16.712	-16.603	-16.091	-15.172	-13.839	-12.085	-9.905	-7.289	-4.233	-0.727	2.333	4.856	6.41	6.172	3.179	-3.357	-13.64
2-methoxyethanamine	109-85-3		-789.828	-754.754	-719.048	-682.714	-645.76	-608.197	-570.037	-531.296	-491.995	-452.163	-411.836	-371.065	-329.918	-288.494	-246.936	-205.471	-164.473	-124.605	-87.084	-54.001	-28.151	-11.455	-3.137	-3.453	-5.563	-7.669	-9.694	-11.565	-13.213	-14.58	-15.611	-16.263	-16.498	-16.285	-15.598	-14.416	-12.722	-10.502	-7.745	-4.443	-0.781	3.347	7.972	13.087	18.684	24.754	31.286
2-methoxythiophene	16839-97-7		126.399	117.975	109.873	102.063	94.518	87.213	80.127	73.242	66.546	60.035	53.708	47.571	41.634	35.911	30.419	25.174	20.194	15.495	11.092	6.999	3.226	-0.218	-3.328	-6.25	-8.832	-11.018	-12.817	-14.236	-15.282	-15.957	-16.263	-16.201	-15.768	-14.958	-13.765	-12.181	-10.196	-7.799	-4.977	-1.72	1.883	5.904	10.374	15.303	20.702	26.578	32.941
2-methyl-1,3-propanediol	2163-42-0		-331.89	-317.017	-301.66	-285.833	-269.555	-252.844	-235.726	-218.228	-200.383	-182.233	-163.829	-145.239	-126.554	-107.9	-89.463	-71.515	-54.455	-38.826	-25.294	-14.508	-6.87	-2.329	-0.403	-2.124	-4.586	-6.852	-8.885	-10.642	-12.085	-13.178	-13.889	-14.188	-14.051	-13.455	-12.383	-10.819	-8.753	-6.173	-3.075	0.549	4.148	7.736	11.124	13.888	15.428	14.992	11.825
2-methyl-1-butanol	137-32-6		-290.12	-277.41	-264.148	-250.348	-236.023	-221.19	-205.868	-190.079	-173.852	-157.222	-140.235	-122.958	-105.488	-87.976	-70.662	-53.922	-38.317	-24.597	-13.581	-5.866	-1.525	-0.054	-0.629	-3.493	-6.594	-9.324	-11.646	-13.531	-14.951	-15.887	-16.318	-16.231	-15.614	-14.459	-12.758	-10.509	-7.708	-4.355	-0.452	4	8.355	12.613	16.561	19.747	21.579	21.393	18.616
2-methyl-1,5-hexadiene	4049-81-4		177.866	165.29	153.176	141.516	130.3	119.517	109.161	99.221	89.691	80.564	71.834	63.496	55.547	47.984	40.806	34.014	27.609	21.594	15.973	10.752	5.936	1.532	-2.45	-6.099	-9.314	-12.052	-14.308	-16.076	-17.352	-18.128	-18.399	-18.158	-17.398	-16.111	-14.292	-11.932	-9.026	-5.567	-1.549	3.035	8.189	13.919	20.23	27.127	34.614	42.695	51.373
2-methyl-1-(methylthio)-propane	5008-69-5		-6.619	-7.497	-7.889	-7.817	-7.312	-6.408	-5.151	-3.592	-1.801	0.143	2.142	4.082	5.838	7.278	8.279	8.737	8.588	7.815	6.454	4.586	2.326	-0.195	-2.843	-5.982	-8.963	-11.544	-13.71	-15.446	-16.736	-17.567	-17.924	-17.793	-17.163	-16.021	-14.357	-12.161	-9.425	-6.14	-2.299	2.103	7.073	12.616	18.736	25.437	32.723	40.598	49.063
2-methyl-1-heptene	15870-10-7		181.127	169.877	158.971	148.382	138.084	128.054	118.274	108.728	99.41	90.315	81.447	72.816	64.437	56.328	48.511	41.012	33.856	27.068	20.673	14.697	9.161	4.086	-0.509	-4.684	-8.347	-11.457	-14.008	-15.995	-17.413	-18.256	-18.521	-18.202	-17.295	-15.797	-13.704	-11.013	-7.721	-3.824	0.68	5.793	11.517	17.855	24.808	32.378	40.567	49.375	58.806
2-methyl-1-hexene	6094-02-06		174.788	163.79	153.159	142.867	132.888	123.196	113.769	104.589	95.64	86.917	78.415	70.14	62.1	54.311	46.792	39.565	32.655	26.086	19.886	14.077	8.685	3.732	-0.762	-4.868	-8.479	-11.548	-14.068	-16.034	-17.439	-18.278	-18.546	-18.237	-17.347	-15.871	-13.805	-11.145	-7.888	-4.031	0.43	5.498	11.175	17.463	24.365	31.882	40.017	48.771	58.146
2-methyl-1-nonene	2980-71-4		186.675	175.288	164.216	153.432	142.912	132.633	122.579	112.74	103.111	93.697	84.506	75.553	66.86	58.449	50.347	42.581	35.18	28.17	21.577	15.425	9.736	4.529	-0.177	-4.433	-8.16	-11.321	-13.912	-15.927	-17.363	-18.214	-18.478	-18.149	-17.226	-15.704	-13.58	-10.853	-7.519	-3.576	0.977	6.144	11.925	18.322	25.337	32.971	41.225	50.101	59.599
2-methyl-1-octene	4588-18-5		182.754	171.537	160.653	150.073	139.77	129.719	119.901	110.301	100.913	91.734	82.77	74.035	65.544	57.321	49.39	41.779	34.515	27.626	21.138	15.076	9.464	4.323	-0.33	-4.549	-8.248	-11.386	-13.959	-15.961	-17.389	-18.236	-18.499	-18.174	-17.256	-15.744	-13.632	-10.919	-7.601	-3.676	0.858	6.004	11.764	18.139	25.131	32.741	40.972	49.824	59.298
2-methyl-1-propanamine	78-81-9		-790.169	-754.786	-718.793	-682.199	-645.014	-607.253	-568.933	-530.076	-490.711	-450.87	-410.598	-369.949	-328.993	-287.82	-246.55	-205.352	-164.505	-124.527	-86.501	-52.623	-26.338	-10.359	-3.689	-4.923	-7.48	-9.859	-11.981	-13.782	-15.209	-16.219	-16.781	-16.868	-16.463	-15.553	-14.126	-12.177	-9.701	-6.696	-3.162	0.901	5.275	10.061	15.287	20.939	27.002	33.462	40.305
2-methyl-1-propanethiol	513-44-0		35.145	32.189	29.7	27.646	25.989	24.684	23.677	22.905	22.296	21.771	21.243	20.623	19.826	18.777	17.42	15.722	13.681	11.323	8.698	5.878	2.943	-0.021	-2.931	-6.091	-9.027	-11.554	-13.661	-15.338	-16.576	-17.365	-17.693	-17.552	-16.932	-15.825	-14.223	-12.119	-9.507	-6.381	-2.737	1.431	5.936	10.866	16.246	22.062	28.3	34.943	41.974
2-methyl-2,4-pentanediol	107-41-5		-381.503	-364.077	-346.154	-327.751	-308.883	-289.573	-269.843	-249.722	-229.244	-208.449	-187.388	-166.127	-144.755	-123.399	-102.249	-81.6	-61.91	-43.848	-28.28	-16.077	-7.75	-3.144	-1.516	-3.507	-6.152	-8.553	-10.667	-12.453	-13.873	-14.895	-15.488	-15.628	-15.293	-14.465	-13.128	-11.272	-8.886	-5.964	-2.498	1.514	5.772	10.276	14.913	19.424	23.406	26.279	27.293
2-methyl-1-phenyl-1-propanone	611-70-1		-142.796	-138.115	-132.923	-127.227	-121.035	-114.356	-107.204	-99.596	-91.555	-83.115	-74.325	-65.255	-56.009	-46.735	-37.639	-28.995	-21.135	-14.418	-9.161	-5.551	-3.586	-3.071	-3.687	-6.07	-8.678	-10.986	-12.968	-14.6	-15.861	-16.731	-17.191	-17.225	-16.819	-15.959	-14.635	-12.837	-10.555	-7.782	-4.511	-0.736	3.51	8.254	13.507	19.273	25.555	32.356	39.678
2-methyl-2,4-hexadiene	28823-41-8		195.689	181.361	167.593	154.379	141.71	129.578	117.973	106.888	96.313	86.238	76.656	67.557	58.933	50.776	43.081	35.84	29.049	22.705	16.806	11.351	6.341	1.777	-2.336	-6.027	-9.26	-12.018	-14.294	-16.082	-17.375	-18.166	-18.446	-18.209	-17.446	-16.151	-14.317	-11.936	-9.002	-5.508	-1.45	3.18	8.384	14.17	20.54	27.5	35.052	43.201	51.949
2-methyl-2-(methylthio)-propane	6163-64-0		-34.135	-34.777	-34.858	-34.392	-33.394	-31.886	-29.897	-27.464	-24.636	-21.475	-18.065	-14.51	-10.94	-7.509	-4.388	-1.754	0.233	1.457	1.866	1.484	0.405	-1.228	-3.243	-6.123	-8.974	-11.466	-13.58	-15.295	-16.591	-17.449	-17.85	-17.777	-17.212	-16.141	-14.551	-12.43	-9.767	-6.551	-2.777	1.565	6.481	11.976	18.054	24.72	31.978	39.831	48.282
2-methyl-2-butanamine	594-39-8		-802.706	-766.833	-730.359	-693.291	-655.641	-617.421	-578.646	-539.337	-499.518	-459.219	-418.481	-377.352	-335.897	-294.2	-252.375	-210.585	-169.094	-128.397	-89.544	-54.724	-27.534	-10.987	-4.176	-5.468	-8.071	-10.47	-12.591	-14.369	-15.755	-16.709	-17.198	-17.199	-16.694	-15.669	-14.116	-12.027	-9.399	-6.228	-2.513	1.746	6.4	11.52	17.124	23.203	29.745	36.74	44.177
2-methyl-2-heptanol	625-25-2		-304.503	-291.134	-277.195	-262.697	-247.653	-232.079	-215.995	-199.423	-182.392	-164.936	-147.102	-128.954	-110.586	-92.148	-73.877	-56.163	-39.607	-25.046	-13.421	-5.429	-1.138	0.07	-0.84	-3.943	-7.211	-10.061	-12.463	-14.388	-15.813	-16.721	-17.095	-16.923	-16.195	-14.905	-13.046	-10.616	-7.612	-4.034	0.117	4.841	9.71	14.728	19.755	24.475	28.444	31.085	31.762
2-methyl-2-heptene	627-97-4		198.749	186.419	174.405	162.688	151.25	140.081	129.174	118.526	108.141	98.029	88.201	78.676	69.473	60.614	52.123	44.021	36.333	29.08	22.283	15.961	10.131	4.809	0.009	-4.318	-8.101	-11.307	-13.933	-15.975	-17.429	-18.292	-18.562	-18.234	-17.306	-15.776	-13.641	-10.899	-7.547	-3.585	0.991	6.181	11.988	18.412	25.456	33.121	41.407	50.315	59.848
2-methyl-2-hexene	2738-19-4		191.766	179.688	167.96	156.562	145.474	134.679	124.165	113.925	103.954	94.255	84.834	75.703	66.875	58.37	50.205	42.404	34.987	27.977	21.395	15.26	9.591	4.406	-0.279	-4.528	-8.252	-11.412	-14.003	-16.021	-17.461	-18.319	-18.592	-18.276	-17.367	-15.862	-13.758	-11.053	-7.744	-3.827	0.698	5.835	11.585	17.95	24.932	32.532	40.753	49.594	59.058
2-methyl-2-propenenitrile	126-98-7		-119.073	-115.892	-112.16	-107.888	-103.092	-97.789	-92.001	-85.754	-79.084	-72.036	-64.666	-57.053	-49.294	-41.518	-33.891	-26.613	-19.914	-14.037	-9.205	-5.577	-3.212	-2.054	-1.948	-3.749	-5.965	-8.052	-9.982	-11.721	-13.234	-14.483	-15.434	-16.052	-16.305	-16.164	-15.605	-14.604	-13.142	-11.202	-8.77	-5.831	-2.493	1.323	5.647	10.484	15.838	21.712	28.11
2-methyl-3-pentanol	565-67-3		-289.432	-275.637	-261.356	-246.605	-231.404	-215.775	-199.742	-183.335	-166.591	-149.554	-132.279	-114.845	-97.363	-80.006	-63.042	-46.884	-32.127	-19.523	-9.813	-3.426	-0.243	0.355	-0.803	-3.92	-7.161	-9.98	-12.35	-14.248	-15.653	-16.548	-16.92	-16.756	-16.048	-14.789	-12.974	-10.6	-7.665	-4.169	-0.112	4.502	9.1	13.684	18.068	21.849	24.488	25.357	23.88
2-methyl-2-propenoicacidbutylester	98-88-1		-145.572	-141.604	-137.083	-132.015	-126.407	-120.266	-113.603	-106.429	-98.763	-90.629	-82.061	-73.111	-63.857	-54.413	-44.947	-35.697	-26.977	-19.17	-12.677	-7.829	-4.778	-3.445	-3.547	-5.915	-8.649	-11.093	-13.208	-14.956	-16.302	-17.218	-17.677	-17.656	-17.136	-16.1	-14.536	-12.432	-9.778	-6.566	-2.79	1.556	6.474	11.97	18.047	24.708	31.955	39.791	48.217
2-methyl-2-pentene	625-27-4		190.656	178.548	166.793	155.371	144.267	133.465	122.956	112.731	102.789	93.131	83.763	74.693	65.937	57.508	49.425	41.707	34.373	27.445	20.94	14.878	9.278	4.154	-0.476	-4.681	-8.369	-11.499	-14.066	-16.067	-17.496	-18.349	-18.623	-18.314	-17.417	-15.93	-13.848	-11.17	-7.891	-4.01	0.477	5.572	11.277	17.594	24.525	32.072	40.237	49.021	58.426
2-methyl-2-propenoylchloride	920-46-7		148.035	137.284	126.969	117.076	107.592	98.503	89.796	81.46	73.485	65.86	58.577	51.628	45.009	38.715	32.743	27.092	21.76	16.75	12.063	7.702	3.671	-0.025	-3.38	-6.476	-9.219	-11.569	-13.526	-15.087	-16.248	-17.004	-17.348	-17.275	-16.777	-15.846	-14.475	-12.655	-10.377	-7.635	-4.419	-0.721	3.354	7.877	12.871	18.342	24.291	30.724	37.641
2-methyl-3-butene-2-ol	115-18-4		-262.495	-251.05	-239.031	-226.451	-213.327	-199.676	-185.523	-170.896	-155.831	-140.374	-124.59	-108.566	-92.43	-76.37	-60.672	-45.746	-32.149	-20.541	-11.529	-5.441	-2.162	-1.188	-1.842	-4.471	-7.299	-9.781	-11.894	-13.617	-14.93	-15.816	-16.258	-16.241	-15.753	-14.782	-13.319	-11.355	-8.884	-5.902	-2.402	1.616	5.519	9.33	12.864	15.7	17.281	16.957	14.135
2-methyl-3-ethylpentane	609-26-7		269.692	250.74	232.435	214.778	197.767	181.402	165.683	150.61	136.182	122.4	109.262	96.769	84.919	73.714	63.152	53.233	43.958	35.325	27.334	19.986	13.279	7.215	1.791	-2.991	-7.132	-10.633	-13.492	-15.712	-17.291	-18.23	-18.529	-18.189	-17.209	-15.589	-13.329	-10.43	-6.892	-2.715	2.102	7.558	13.654	20.389	27.763	35.777	44.43	53.722	63.655
2-methyl-3-heptanol	18720-62-2		-281.989	-268.728	-254.983	-240.765	-226.089	-210.969	-195.423	-179.474	-163.147	-146.478	-129.512	-112.319	-95.003	-77.736	-60.796	-44.624	-29.871	-17.363	-7.904	-1.925	0.765	0.884	-0.672	-3.968	-7.31	-10.207	-12.634	-14.567	-15.988	-16.881	-17.233	-17.034	-16.276	-14.953	-13.062	-10.598	-7.561	-3.95	0.232	4.985	9.827	14.753	19.59	23.973	27.392	29.217	28.812
2-methyl-3-heptene	17618-76-7		228.514	213.48	198.829	184.567	170.699	157.234	144.18	131.549	119.351	107.599	96.304	85.479	75.136	65.286	55.941	47.109	38.803	31.029	23.798	17.116	10.991	5.429	0.436	-4.006	-7.87	-11.141	-13.819	-15.9	-17.382	-18.263	-18.54	-18.212	-17.276	-15.73	-13.573	-10.804	-7.42	-3.419	1.199	6.436	12.293	18.771	25.873	33.598	41.948	50.924	60.527
2-methyl-3-hexyne	36566-80-0		147.006	136.698	126.811	117.333	108.248	99.545	91.205	83.215	75.557	68.214	61.172	54.415	47.93	41.708	35.742	30.029	24.568	19.366	14.43	9.773	5.411	1.361	-2.356	-5.941	-9.162	-11.914	-14.191	-15.984	-17.284	-18.083	-18.372	-18.143	-17.385	-16.092	-14.256	-11.868	-8.922	-5.412	-1.331	3.326	8.564	14.388	20.802	27.81	35.416	43.622	52.432
2-methyl-benzeneamine	95-53-4		-216.578	-205.161	-193.203	-180.716	-167.716	-154.223	-140.266	-125.887	-111.149	-96.146	-81.027	-66.019	-51.461	-37.828	-25.715	-15.74	-8.357	-3.666	-1.37	-0.914	-1.696	-3.2	-5.048	-7.351	-9.499	-11.312	-12.798	-13.959	-14.8	-15.32	-15.521	-15.4	-14.955	-14.182	-13.078	-11.637	-9.855	-7.726	-5.247	-2.412	0.079	2.52	4.998	7.473	9.914	12.299	14.619
2-methyl-n-(2-methylpropyl)-1-propanamine	110-96-3		-621.431	-589.976	-557.97	-525.435	-492.399	-458.895	-424.965	-390.66	-356.043	-321.191	-286.195	-251.166	-216.238	-181.579	-147.419	-114.126	-82.371	-53.415	-29.321	-12.362	-3.291	-0.481	-1.34	-4.727	-8.191	-11.172	-13.648	-15.6	-17.012	-17.872	-18.17	-17.897	-17.048	-15.616	-13.598	-10.991	-7.792	-4.001	0.383	5.361	10.877	16.956	23.603	30.811	38.573	46.881	55.726
2-methyl-propanenitrile	78-82-0		-164.03	-158.998	-153.409	-147.275	-140.608	-133.426	-125.746	-117.592	-108.994	-99.99	-90.628	-80.971	-71.105	-61.143	-51.235	-41.58	-32.425	-24.064	-16.807	-10.935	-6.63	-3.926	-2.697	-4.079	-6.117	-8.104	-10.001	-11.761	-13.334	-14.669	-15.717	-16.431	-16.772	-16.702	-16.19	-15.21	-13.738	-11.757	-9.25	-6.204	-2.66	1.424	6.061	11.258	17.018	23.345	30.241
2-methyl-pentanal	123-15-9		-165.865	-160.701	-154.985	-148.729	-141.948	-134.658	-126.879	-118.635	-109.954	-100.871	-91.432	-81.695	-71.741	-61.679	-51.661	-41.89	-32.634	-24.219	-16.997	-11.285	-7.277	-4.982	-4.211	-6.057	-8.453	-10.657	-12.623	-14.304	-15.654	-16.633	-17.204	-17.332	-16.99	-16.155	-14.804	-12.923	-10.496	-7.512	-3.962	0.162	4.866	10.155	16.034	22.505	29.572	37.236	45.501
2-methyl-quinoline	91-63-4		-482.938	-459.956	-436.439	-412.398	-387.843	-362.79	-337.256	-311.263	-284.843	-258.031	-230.88	-203.46	-175.873	-148.275	-120.924	-94.257	-69.019	-46.386	-27.874	-14.752	-7.188	-4.09	-3.87	-6.231	-8.858	-11.15	-13.091	-14.669	-15.871	-16.686	-17.103	-17.114	-16.708	-15.878	-14.614	-12.908	-10.753	-8.139	-5.06	-1.507	2.509	7.005	11.995	17.485	23.481	29.99	37.02
2-methyl-benzoicacidethylester	87-26-1		-110.048	-106.792	-103.014	-98.721	-93.922	-88.629	-82.859	-76.633	-69.981	-62.946	-55.59	-48.002	-40.304	-32.667	-25.313	-18.517	-12.584	-7.8	-4.375	-2.379	-1.722	-2.18	-3.461	-6.113	-8.86	-11.262	-13.3	-14.956	-16.211	-17.049	-17.456	-17.417	-16.92	-15.954	-14.509	-12.574	-10.141	-7.203	-3.751	0.22	4.716	9.743	15.306	21.412	28.064	35.267	43.026
2-methyl-nonane	871-83-0		269.3	250.398	232.139	214.523	197.551	181.221	165.535	150.491	136.089	122.33	109.212	96.737	84.904	73.713	63.163	53.255	43.989	35.364	27.38	20.038	13.337	7.278	1.86	-2.917	-7.053	-10.548	-13.401	-15.612	-17.183	-18.112	-18.399	-18.045	-17.049	-15.411	-13.132	-10.211	-6.647	-2.442	2.406	7.897	14.03	20.805	28.224	36.285	44.99	54.338	64.33
2-methylaziridine	75-55-8		-708.632	-676.818	-644.437	-611.501	-578.024	-544.022	-509.515	-474.525	-439.078	-403.207	-366.951	-330.361	-293.503	-256.466	-219.375	-182.425	-145.932	-110.467	-77.097	-47.687	-24.779	-10.194	-3.311	-4.06	-6.307	-8.502	-10.56	-12.408	-13.982	-15.226	-16.097	-16.557	-16.577	-16.136	-15.215	-13.8	-11.881	-9.45	-6.501	-3.031	0.749	4.937	9.562	14.605	20.05	25.875	32.059
2-methyl-thiazole	3581-87-1		-392.325	-374.476	-356.122	-337.272	-317.933	-298.116	-277.834	-257.102	-235.94	-214.373	-192.439	-170.193	-147.718	-125.153	-102.722	-80.805	-60.011	-41.237	-25.583	-13.993	-6.744	-3.262	-2.48	-4.583	-7.116	-9.378	-11.347	-13	-14.319	-15.284	-15.878	-16.087	-15.898	-15.298	-14.275	-12.822	-10.927	-8.583	-5.783	-2.518	1.017	4.934	9.271	14.028	19.203	24.794	30.799
2-methylbenzonitrile	529-19-1		-114.05	-110.432	-106.282	-101.613	-96.44	-90.782	-84.663	-78.114	-71.176	-63.902	-56.366	-48.665	-40.927	-33.318	-26.047	-19.355	-13.501	-8.721	-5.179	-2.933	-1.913	-1.944	-2.789	-5.021	-7.435	-9.607	-11.516	-13.14	-14.457	-15.447	-16.087	-16.358	-16.243	-15.725	-14.789	-13.42	-11.605	-9.334	-6.595	-3.378	0.246	4.333	8.903	13.963	19.518	25.572	32.131
2-methylbenzenemethanamine	89-93-0		-699.84	-666.489	-632.574	-598.107	-563.105	-527.586	-491.574	-455.097	-418.188	-380.89	-343.253	-305.341	-267.233	-229.039	-190.92	-153.15	-116.259	-81.337	-50.458	-26.604	-11.865	-5.275	-3.802	-5.834	-8.27	-10.433	-12.3	-13.852	-15.069	-15.934	-16.432	-16.548	-16.268	-15.579	-14.47	-12.93	-10.948	-8.514	-5.62	-2.258	1.337	5.291	9.642	14.384	19.508	25.004	30.863
2-methylbutanal	96-17-3		-165.271	-160.297	-154.781	-148.735	-142.172	-135.109	-127.563	-119.556	-111.111	-102.263	-93.049	-83.523	-73.757	-63.848	-53.93	-44.19	-34.873	-26.284	-18.77	-12.66	-8.19	-5.426	-4.239	-5.873	-8.147	-10.272	-12.199	-13.88	-15.266	-16.312	-16.976	-17.222	-17.017	-16.333	-15.148	-13.441	-11.198	-8.403	-5.047	-1.121	3.384	8.472	14.149	20.419	27.285	34.751	42.818
2-methylcyclohexanone	583-60-8		-240.36	-232.025	-223.134	-213.699	-203.732	-193.248	-182.265	-170.802	-158.883	-146.536	-133.796	-120.707	-107.329	-93.746	-80.078	-66.504	-53.283	-40.782	-29.477	-19.903	-12.533	-7.604	-5.013	-6.273	-8.443	-10.501	-12.388	-14.044	-15.411	-16.438	-17.079	-17.292	-17.045	-16.308	-15.058	-13.275	-10.945	-8.053	-4.59	-0.546	4.084	9.306	15.125	21.545	28.568	36.197	44.435
2-methylcyclohexanol	583-59-5		-294.856	-281.751	-268.103	-253.925	-239.236	-224.055	-208.405	-192.311	-175.807	-158.93	-141.73	-124.275	-106.661	-89.036	-71.63	-54.807	-39.114	-25.289	-14.151	-6.315	-1.88	-0.356	-0.913	-3.813	-6.95	-9.697	-12.022	-13.897	-15.296	-16.2	-16.591	-16.455	-15.782	-14.561	-12.788	-10.458	-7.568	-4.116	-0.105	4.465	9.043	13.639	18.079	21.985	24.839	26.025	24.939
2-methylbutanoicacid	116-53-0		-101.644	-98.939	-95.744	-92.069	-87.923	-83.322	-78.28	-72.818	-66.965	-60.757	-54.245	-47.499	-40.615	-33.719	-26.978	-20.6	-14.823	-9.895	-6.031	-3.369	-1.927	-1.6	-2.187	-4.519	-7.102	-9.387	-11.341	-12.936	-14.142	-14.934	-15.288	-15.183	-14.603	-13.532	-11.959	-9.877	-7.278	-4.159	-0.521	3.634	7.274	10.026	10.977	8.564	1.128	-12.111	-30.465
2-methylcyclopentanone	1120-72-5		-220.86	-213.231	-205.1	-196.478	-187.379	-177.815	-167.802	-157.357	-146.5	-135.254	-123.649	-111.723	-99.528	-87.137	-74.657	-62.247	-50.136	-38.645	-28.19	-19.243	-12.233	-7.412	-4.745	-5.89	-7.98	-9.989	-11.858	-13.528	-14.941	-16.041	-16.781	-17.117	-17.012	-16.435	-15.361	-13.768	-11.639	-8.96	-5.719	-1.906	2.485	7.461	13.028	19.19	25.949	33.309	41.272
2-methyldecane	69-75-98-0		269.008	250.127	231.888	214.292	197.338	181.026	165.356	150.328	135.942	122.197	109.094	96.632	84.811	73.631	63.093	53.195	43.938	35.322	27.347	20.012	13.318	7.265	1.852	-2.92	-7.051	-10.542	-13.392	-15.601	-17.169	-18.096	-18.383	-18.028	-17.033	-15.396	-13.117	-10.198	-6.637	-2.434	2.411	7.897	14.026	20.797	28.21	36.266	44.965	54.306	64.29
2-methylheptane	592-27-8		269.834	250.888	232.588	214.934	197.925	181.56	165.841	150.766	136.335	122.548	109.406	96.907	85.052	73.84	63.271	53.346	44.063	35.423	27.427	20.072	13.36	7.291	1.864	-2.921	-7.063	-10.564	-13.422	-15.637	-17.211	-18.143	-18.432	-18.079	-17.084	-15.446	-13.166	-10.244	-6.679	-2.471	2.379	7.872	14.009	20.788	28.211	36.278	44.988	54.341	64.339
2-methylhexane	591-76-4		270.442	251.456	233.118	215.426	198.381	181.982	166.229	151.122	136.661	122.845	109.674	97.148	85.267	74.03	63.438	53.491	44.188	35.529	27.514	20.143	13.415	7.332	1.892	-2.904	-7.057	-10.566	-13.432	-15.654	-17.232	-18.167	-18.459	-18.107	-17.111	-15.472	-13.189	-10.262	-6.691	-2.476	2.383	7.886	14.034	20.826	28.262	36.344	45.07	54.441	64.458
2-methyldodecane	1560-97-0		268.445	249.604	231.405	213.846	196.928	180.65	165.013	150.015	135.658	121.941	108.864	96.427	84.63	73.472	62.954	53.075	43.836	35.236	27.277	19.956	13.275	7.234	1.832	-2.93	-7.053	-10.536	-13.379	-15.582	-17.145	-18.068	-18.352	-17.995	-16.997	-15.36	-13.081	-10.162	-6.602	-2.401	2.441	7.924	14.049	20.815	28.223	36.273	44.965	54.3	64.277
2-methylheptanal	16630-91-4		-158.386	-153.164	-147.396	-141.096	-134.279	-126.962	-119.166	-110.915	-102.239	-93.177	-83.78	-74.113	-64.271	-54.381	-44.622	-35.233	-26.518	-18.83	-12.52	-7.855	-4.937	-3.661	-3.748	-6.019	-8.66	-11.033	-13.098	-14.811	-16.137	-17.042	-17.495	-17.472	-16.95	-15.911	-14.341	-12.226	-9.557	-6.325	-2.523	1.854	6.81	12.35	18.475	25.187	32.49	40.384	48.87
2-methyloctane	3221-61-2		269.365	250.454	232.187	214.564	197.585	181.249	165.556	150.507	136.1	122.337	109.216	96.737	84.901	73.707	63.155	53.244	43.976	35.35	27.365	20.022	13.32	7.26	1.841	-2.936	-7.072	-10.566	-13.419	-15.63	-17.2	-18.128	-18.415	-18.06	-17.063	-15.424	-13.144	-10.221	-6.656	-2.449	2.4	7.893	14.027	20.805	28.226	36.289	44.997	54.347	64.342
2-methylpentanedinitrile	4553-62-2		-131.388	-127.589	-123.252	-118.391	-113.02	-107.158	-100.827	-94.053	-86.871	-79.322	-71.462	-63.359	-55.102	-46.805	-38.608	-30.685	-23.238	-16.488	-10.655	-5.921	-2.403	-0.124	0.991	-0.204	-2.023	-3.845	-5.659	-7.438	-9.149	-10.752	-12.2	-13.447	-14.448	-15.16	-15.542	-15.559	-15.18	-14.377	-13.127	-11.408	-9.54	-7.305	-4.627	-1.498	2.087	6.134	10.649
2-methylpropanoicacidethylester	97-62-1		-161.187	-156.558	-151.405	-145.736	-139.559	-132.883	-125.717	-118.076	-109.974	-101.436	-92.49	-83.18	-73.568	-63.746	-53.847	-44.061	-34.648	-25.94	-18.32	-12.158	-7.714	-5.056	-4.028	-5.878	-8.337	-10.59	-12.592	-14.298	-15.664	-16.652	-17.225	-17.354	-17.009	-16.168	-14.811	-12.921	-10.484	-7.487	-3.922	0.221	4.948	10.265	16.178	22.69	29.806	37.528	45.858
2-methylpyridine	109-06-8		-532.443	-508.681	-484.39	-459.576	-434.249	-408.419	-382.099	-355.302	-328.047	-300.356	-272.257	-243.789	-215.004	-185.986	-156.867	-127.883	-99.464	-72.403	-48.037	-28.18	-14.381	-6.776	-3.956	-5.649	-8.088	-10.304	-12.258	-13.917	-15.249	-16.226	-16.827	-17.029	-16.816	-16.171	-15.08	-13.531	-11.514	-9.018	-6.035	-2.555	1.409	5.877	10.86	16.365	22.396	28.961	36.065
2-methylpropanoicacidmethylester	547-63-7		-154.007	-149.605	-144.708	-139.323	-133.455	-127.112	-120.301	-113.035	-105.33	-97.205	-88.691	-79.829	-70.681	-61.336	-51.92	-42.612	-33.653	-25.349	-18.047	-12.086	-7.714	-5.008	-3.852	-5.567	-7.921	-10.095	-12.048	-13.737	-15.119	-16.155	-16.808	-17.045	-16.837	-16.161	-14.993	-13.315	-11.113	-8.372	-5.083	-1.235	3.179	8.165	13.73	19.878	26.614	33.941	41.863
2-methylpyrazine	109-08-0		-417.324	-399.266	-380.691	-361.61	-342.037	-321.985	-301.473	-280.518	-259.144	-237.378	-215.255	-192.82	-170.137	-147.3	-124.453	-101.829	-79.809	-58.997	-40.273	-24.708	-13.209	-6.032	-2.609	-3.929	-6.233	-8.393	-10.37	-12.126	-13.623	-14.825	-15.699	-16.215	-16.347	-16.071	-15.367	-14.219	-12.61	-10.528	-7.962	-4.902	-1.412	2.558	7.03	12.008	17.497	23.502	30.025
2-methylthiophene	554-14-3		199.168	184.19	169.799	155.992	142.764	130.111	118.028	106.512	95.556	85.155	75.303	65.994	57.222	48.978	41.257	34.049	27.349	21.147	15.436	10.207	5.454	1.167	-2.658	-6.03	-8.954	-11.434	-13.476	-15.082	-16.255	-16.994	-17.3	-17.172	-16.607	-15.601	-14.151	-12.251	-9.895	-7.078	-3.792	-0.031	4.122	8.724	13.795	19.34	25.363	31.866	38.852
2-methyltridecane	1560-96-9		268.063	249.243	231.064	213.525	196.627	180.369	164.751	149.773	135.434	121.735	108.676	96.256	84.475	73.333	62.831	52.967	43.742	35.156	27.208	19.9	13.23	7.198	1.806	-2.949	-7.064	-10.541	-13.379	-15.579	-17.139	-18.061	-18.344	-17.988	-16.993	-15.359	-13.086	-10.173	-6.62	-2.429	2.403	7.875	13.987	20.739	28.131	36.164	44.837	54.152	64.107
2-methylvalericacid	97-61-0		-101.065	-98.057	-94.564	-90.598	-86.171	-81.298	-75.999	-70.297	-64.223	-57.818	-51.138	-44.26	-37.289	-30.366	-23.673	-17.434	-11.902	-7.327	-3.909	-1.751	-0.827	-0.986	-1.995	-4.561	-7.299	-9.704	-11.746	-13.397	-14.629	-15.419	-15.747	-15.593	-14.945	-13.788	-12.115	-9.917	-7.193	-3.938	-0.156	4.15	7.993	10.994	12.243	10.165	3.064	-9.903	-28.073
2-methylundecane	7045-71-8		268.39	249.55	231.35	213.792	196.875	180.599	164.963	149.968	135.614	121.899	108.825	96.39	84.596	73.441	62.926	53.05	43.814	35.217	27.26	19.942	13.264	7.224	1.824	-2.937	-7.058	-10.541	-13.384	-15.587	-17.151	-18.076	-18.361	-18.006	-17.011	-15.377	-13.102	-10.188	-6.633	-2.438	2.398	7.875	13.992	20.75	28.15	36.191	44.874	54.198	64.165
2-nonanone	821-55-6		-237.335	-228.34	-218.817	-208.778	-198.234	-187.202	-175.697	-163.74	-151.355	-138.57	-125.424	-111.967	-98.272	-84.445	-70.644	-57.105	-44.172	-32.306	-22.06	-13.963	-8.348	-5.201	-4.164	-6.137	-8.685	-10.999	-13.03	-14.728	-16.051	-16.962	-17.428	-17.422	-16.921	-15.907	-14.365	-12.283	-9.652	-6.464	-2.713	1.606	6.497	11.961	18.002	24.621	31.82	39.6	47.961
2-nonanol	628-99-9		-290.355	-277.016	-263.127	-248.702	-233.756	-218.308	-202.378	-185.993	-169.184	-151.992	-134.47	-116.694	-98.776	-80.895	-63.337	-46.553	-31.214	-18.177	-8.288	-2.012	0.846	1.034	-0.511	-3.82	-7.176	-10.086	-12.522	-14.461	-15.883	-16.774	-17.12	-16.911	-16.139	-14.799	-12.887	-10.401	-7.34	-3.704	0.504	5.281	10.143	15.074	19.888	24.195	27.452	28.982	28.108
2-octanone	111-13-7		-241.133	-232.202	-222.727	-212.721	-202.196	-191.168	-179.653	-167.673	-155.252	-142.419	-129.212	-115.683	-101.899	-87.963	-74.024	-60.304	-47.125	-34.93	-24.26	-15.657	-9.504	-5.854	-4.403	-6.19	-8.637	-10.881	-12.868	-14.548	-15.876	-16.809	-17.313	-17.359	-16.921	-15.98	-14.518	-12.523	-9.983	-6.89	-3.238	0.98	5.766	11.125	17.06	23.571	30.662	38.334	46.588
2-nonynoicacid	1846-70-4		-40.202	-39.433	-38.22	-36.581	-34.533	-32.102	-29.318	-26.219	-22.855	-19.292	-15.61	-11.913	-8.327	-4.997	-2.079	0.274	1.932	2.816	2.909	2.265	0.997	-0.746	-2.798	-5.578	-8.288	-10.629	-12.584	-14.134	-15.265	-15.96	-16.208	-15.998	-15.321	-14.17	-12.541	-10.431	-7.84	-4.771	-1.227	2.783	6.084	8.029	7.245	1.595	-10.698	-29.642	-53.509
2-oxepanone	502-44-3		-262.461	-252.438	-241.941	-230.987	-219.593	-207.778	-195.562	-182.968	-170.02	-156.748	-143.183	-129.363	-115.34	-101.176	-86.965	-72.839	-58.993	-45.711	-33.381	-22.492	-13.555	-6.971	-2.868	-3.395	-5.217	-7.122	-9.047	-10.921	-12.668	-14.215	-15.496	-16.45	-17.026	-17.181	-16.88	-16.093	-14.796	-12.971	-10.602	-7.678	-4.197	-0.148	4.48	9.69	15.487	21.873	28.852
2-octyne	2809-67-8		156.945	145.557	134.669	124.264	114.326	104.836	95.777	87.129	78.873	70.989	63.46	56.268	49.398	42.84	36.582	30.62	24.952	19.579	14.507	9.746	5.307	1.205	-2.544	-6.1	-9.274	-11.985	-14.223	-15.982	-17.253	-18.027	-18.298	-18.055	-17.291	-15.998	-14.17	-11.798	-8.876	-5.399	-1.361	3.244	8.42	14.171	20.501	27.413	34.911	42.998	51.676
2-pentanolacetate	626-38-0		-183.235	-177.193	-170.636	-163.572	-156.011	-147.964	-139.445	-130.467	-121.05	-111.219	-101.007	-90.46	-79.648	-68.668	-57.668	-46.855	-36.52	-27.032	-18.815	-12.265	-7.643	-4.974	-4.036	-5.955	-8.456	-10.74	-12.758	-14.464	-15.817	-16.778	-17.313	-17.392	-16.991	-16.087	-14.663	-12.704	-10.198	-7.135	-3.506	0.695	5.474	10.834	16.781	23.317	30.445	38.166	46.484
2-pentanethiol	2084-19-7		28.141	25.28	22.922	21.042	19.608	18.582	17.916	17.552	17.42	17.436	17.506	17.523	17.379	16.971	16.209	15.032	13.415	11.373	8.955	6.244	3.337	0.341	-2.642	-5.906	-8.943	-11.558	-13.737	-15.469	-16.742	-17.545	-17.866	-17.696	-17.024	-15.843	-14.144	-11.921	-9.169	-5.88	-2.053	2.318	7.097	12.347	18.087	24.304	30.988	38.123	45.693
2-phenylethanol	60-12-8		-253.699	-241.981	-229.719	-216.925	-203.611	-189.795	-175.496	-160.741	-145.566	-130.019	-114.173	-98.136	-82.075	-66.244	-51.02	-36.93	-24.621	-14.733	-7.681	-3.466	-1.676	-1.671	-2.809	-5.282	-7.813	-10.017	-11.885	-13.407	-14.573	-15.37	-15.789	-15.816	-15.442	-14.654	-13.442	-11.796	-9.704	-7.158	-4.15	-0.672	2.687	5.937	8.881	11.085	11.957	10.794	6.956
2-pipecoline	109-05-7		-764.958	-730.708	-695.849	-660.387	-624.333	-587.697	-550.496	-512.749	-474.481	-435.723	-396.519	-356.922	-317.003	-276.856	-236.609	-196.445	-156.665	-117.829	-81.09	-48.72	-24.113	-9.639	-3.987	-5.635	-8.413	-10.928	-13.115	-14.917	-16.289	-17.193	-17.603	-17.494	-16.85	-15.657	-13.907	-11.592	-8.707	-5.251	-1.221	3.383	8.453	14.034	20.133	26.736	33.828	41.39	49.403
2-propen-1-ol	107-18-6		-255.452	-244.195	-232.389	-220.046	-207.184	-193.822	-179.984	-165.698	-151.001	-135.94	-120.581	-105.015	-89.374	-73.856	-58.744	-44.44	-31.465	-20.402	-11.759	-5.786	-2.36	-1.044	-1.258	-3.477	-5.964	-8.175	-10.092	-11.699	-12.978	-13.911	-14.479	-14.666	-14.454	-13.828	-12.772	-11.274	-9.322	-6.904	-4.011	-0.636	2.349	4.979	7.005	7.886	6.95	3.531	-2.806
2-propenenitrile	107-13-1		-111.647	-108.58	-104.968	-100.824	-96.165	-91.011	-85.386	-79.321	-72.855	-66.039	-58.935	-51.628	-44.223	-36.854	-29.685	-22.91	-16.738	-11.38	-7.015	-3.756	-1.63	-0.571	-0.435	-2.059	-4.066	-5.957	-7.72	-9.334	-10.777	-12.023	-13.044	-13.813	-14.301	-14.484	-14.337	-13.836	-12.961	-11.692	-10.012	-7.905	-5.919	-3.712	-1.166	1.726	4.972	8.581	12.563
2-propenoicacid-2-methylpropylester	106-63-8		-141.904	-138.119	-133.795	-128.939	-123.556	-117.653	-111.24	-104.33	-96.939	-89.091	-80.821	-72.18	-63.243	-54.118	-44.966	-36.006	-27.531	-19.896	-13.473	-8.578	-5.376	-3.821	-3.676	-5.877	-8.494	-10.845	-12.894	-14.602	-15.935	-16.865	-17.364	-17.409	-16.981	-16.062	-14.64	-12.703	-10.24	-7.244	-3.709	0.372	4.975	10.121	15.816	22.063	28.863	36.217	44.127
2-propenoicacid-2-ethylhexylester	103-11-7		-123.739	-120.511	-116.721	-112.374	-107.478	-102.043	-96.078	-89.6	-82.632	-75.203	-67.359	-59.166	-50.724	-42.173	-33.716	-25.621	-18.226	-11.906	-7	-3.728	-2.108	-1.956	-2.942	-5.691	-8.631	-11.221	-13.425	-15.214	-16.558	-17.436	-17.826	-17.712	-17.08	-15.918	-14.217	-11.969	-9.169	-5.812	-1.893	2.589	7.617	13.203	19.351	26.062	33.333	41.165	49.557
2-propenoicacid-2-hydroxyethylester	818-61-1		-254.932	-243.568	-231.735	-219.453	-206.748	-193.645	-180.18	-166.391	-152.327	-138.043	-123.608	-109.107	-94.647	-80.367	-66.446	-53.121	-40.689	-29.506	-19.944	-12.318	-6.793	-3.321	-1.649	-3.092	-5.235	-7.225	-9.039	-10.648	-12.023	-13.135	-13.953	-14.45	-14.598	-14.374	-13.755	-12.72	-11.251	-9.334	-6.952	-4.094	-1.144	1.945	5.066	7.938	10.121	10.983	9.747
2-propenoicacidethylester	140-88-5		-125.564	-123.013	-119.886	-116.189	-111.93	-107.118	-101.765	-95.886	-89.501	-82.638	-75.334	-67.642	-59.638	-51.427	-43.154	-35.015	-27.263	-20.197	-14.133	-9.35	-6.016	-4.144	-3.582	-5.479	-7.877	-10.062	-12	-13.659	-15.006	-16.009	-16.64	-16.871	-16.679	-16.043	-14.943	-13.364	-11.291	-8.711	-5.615	-1.991	2.136	6.792	11.989	17.732	24.026	30.875	38.282
2-propenoicacidbutylester	141-32-2		-132.196	-128.891	-125.037	-120.641	-115.709	-110.248	-104.27	-97.789	-90.824	-83.401	-75.559	-67.353	-58.863	-50.206	-41.543	-33.099	-25.161	-18.066	-12.161	-7.722	-4.882	-3.58	-3.583	-5.819	-8.441	-10.791	-12.834	-14.535	-15.862	-16.787	-17.284	-17.331	-16.907	-15.998	-14.588	-12.667	-10.223	-7.25	-3.739	0.314	4.888	10.003	15.666	21.878	28.642	35.96	43.832
2-propoxyethanol	2807-30-9		-314.429	-301.5	-288.061	-274.119	-259.684	-244.766	-229.379	-213.54	-197.269	-180.593	-163.548	-146.182	-128.564	-110.797	-93.036	-75.523	-58.625	-42.878	-28.98	-17.682	-9.536	-4.627	-2.522	-4.337	-6.932	-9.298	-11.39	-13.165	-14.583	-15.607	-16.206	-16.352	-16.022	-15.194	-13.854	-11.986	-9.579	-6.624	-3.114	0.958	5.306	9.958	14.837	19.748	24.389	28.32	30.946
2-propenylesterbutanoicacid	2051-78-7		-128.958	-125.325	-121.168	-116.495	-111.317	-105.644	-99.49	-92.875	-85.822	-78.365	-70.55	-62.443	-54.135	-45.754	-37.477	-29.531	-22.196	-15.78	-10.573	-6.78	-4.463	-3.521	-3.72	-5.908	-8.424	-10.678	-12.641	-14.284	-15.579	-16.498	-17.018	-17.115	-16.769	-15.962	-14.677	-12.901	-10.619	-7.823	-4.501	-0.645	3.752	8.696	14.194	20.251	26.872	34.061	41.823
2-propylpiperidine	458-88-8		-739.484	-705.749	-671.428	-636.534	-601.077	-565.074	-528.543	-491.508	-453.996	-416.043	-377.692	-339	-300.035	-260.888	-221.683	-182.605	-143.971	-106.413	-71.261	-41.053	-19.181	-7.31	-3.391	-5.554	-8.542	-11.198	-13.468	-15.305	-16.673	-17.542	-17.888	-17.692	-16.941	-15.624	-13.731	-11.257	-8.197	-4.548	-0.309	4.523	9.877	15.783	22.249	29.266	36.823	44.911	53.517
2-pyridineethanol	103-74-2		-423.02	-403.451	-383.516	-363.223	-342.581	-321.598	-300.286	-278.656	-256.724	-234.508	-212.033	-189.335	-166.468	-143.515	-120.615	-98.001	-76.073	-55.482	-37.176	-22.277	-11.651	-5.393	-2.749	-4.295	-6.642	-8.81	-10.759	-12.454	-13.859	-14.945	-15.684	-16.051	-16.026	-15.59	-14.726	-13.419	-11.658	-9.429	-6.723	-3.53	0.062	4.088	8.543	13.389	18.557	23.929	29.308
2-pyridinecarboxaldehyde	1121-60-4		-366.648	-347.714	-328.464	-308.906	-289.049	-268.907	-248.496	-227.843	-206.986	-185.981	-164.912	-143.897	-123.107	-102.776	-83.224	-64.868	-48.207	-33.775	-22.026	-13.2	-7.231	-3.766	-2.286	-3.828	-6.012	-8.034	-9.87	-11.495	-12.881	-14.001	-14.827	-15.335	-15.499	-15.298	-14.712	-13.723	-12.314	-10.471	-8.182	-5.434	-2.359	1.139	5.096	9.52	14.416	19.792	25.653
2-tert-butylpyridine	5944-41-2		-349.038	-331.497	-313.489	-295.036	-276.161	-256.889	-237.247	-217.265	-196.977	-176.423	-155.654	-134.746	-113.811	-93.041	-72.759	-53.497	-36.068	-21.509	-10.773	-4.228	-1.408	-1.29	-2.8	-5.875	-8.947	-11.585	-13.777	-15.513	-16.784	-17.583	-17.903	-17.736	-17.079	-15.926	-14.273	-12.116	-9.452	-6.278	-2.59	1.614	6.324	11.551	17.299	23.57	30.368	37.694	45.552
2-thiophenemethanol	636-72-6		-224.579	-213.737	-202.389	-190.547	-178.23	-165.458	-152.256	-138.657	-124.704	-110.457	-96.001	-81.464	-67.032	-52.982	-39.699	-27.682	-17.482	-9.576	-4.188	-1.197	-0.184	-0.598	-1.913	-4.368	-6.83	-8.956	-10.744	-12.192	-13.299	-14.061	-14.476	-14.539	-14.246	-13.591	-12.568	-11.169	-9.386	-7.212	-4.638	-1.655	0.824	2.913	4.42	4.856	3.601	0.009	-6.397
2-vinyltoluene	611-15-4		200.734	185.572	171.006	157.032	143.646	130.845	118.622	106.974	95.895	85.379	75.42	66.011	57.145	48.814	41.012	33.731	26.961	20.696	14.927	9.645	4.844	0.515	-3.347	-6.749	-9.696	-12.193	-14.242	-15.846	-17.005	-17.719	-17.986	-17.803	-17.166	-16.071	-14.511	-12.481	-9.973	-6.98	-3.494	0.492	4.986	9.997	15.53	21.595	28.197	35.344	43.042
2-vinylpyridine	100-69-6		-414.083	-392.813	-371.034	-348.767	-326.038	-302.879	-279.329	-255.439	-231.27	-206.9	-182.428	-157.983	-133.739	-109.943	-86.964	-65.351	-45.885	-29.523	-17.118	-8.996	-4.721	-3.335	-3.795	-6.198	-8.763	-10.986	-12.861	-14.38	-15.537	-16.324	-16.734	-16.761	-16.397	-15.633	-14.461	-12.874	-10.861	-8.415	-5.524	-2.181	1.583	5.802	10.495	15.669	21.333	27.497	34.168
2-undecanol	1653-30-1		-284.468	-271.43	-257.826	-243.668	-228.972	-213.754	-198.035	-181.84	-165.198	-148.15	-130.75	-113.074	-95.242	-77.443	-59.984	-43.352	-28.263	-15.616	-6.257	-0.58	1.712	1.446	-0.423	-3.865	-7.293	-10.256	-12.728	-14.689	-16.119	-17.005	-17.336	-17.101	-16.294	-14.911	-12.947	-10.4	-7.271	-3.559	0.733	5.603	10.627	15.784	20.902	25.618	29.41	31.606	31.489
2-vinylfuran	1487-18-9		201.542	186.153	171.365	157.176	143.585	130.588	118.183	106.367	95.135	84.484	74.409	64.906	55.97	47.594	39.772	32.497	25.761	19.558	13.877	8.709	4.046	-0.124	-3.811	-7.037	-9.803	-12.116	-13.985	-15.42	-16.432	-17.028	-17.215	-16.998	-16.383	-15.37	-13.96	-12.152	-9.943	-7.329	-4.303	-0.858	2.748	6.665	10.946	15.593	20.611	26.002	31.77
3,3'-iminodipropylamine	56-18-8		-824.28	-785.958	-747.141	-707.842	-668.072	-627.847	-587.185	-546.106	-504.639	-462.815	-420.677	-378.28	-335.698	-293.029	-250.409	-208.039	-166.242	-125.596	-87.227	-53.259	-26.827	-10.286	-2.744	-3.522	-5.84	-8.057	-10.101	-11.91	-13.428	-14.609	-15.416	-15.816	-15.787	-15.308	-14.365	-12.946	-11.041	-8.645	-5.752	-2.36	1.246	5.213	9.587	14.356	19.51	25.039	30.933
3,3'-iminodipropionitrile	111-94-4		-321.399	-302.57	-283.348	-263.788	-243.959	-223.949	-203.865	-183.838	-164.02	-144.584	-125.714	-107.596	-90.408	-74.308	-59.438	-45.927	-33.9	-23.481	-14.782	-7.88	-2.778	0.609	2.46	1.504	-0.223	-1.996	-3.809	-5.641	-7.458	-9.217	-10.871	-12.368	-13.657	-14.689	-15.419	-15.807	-15.816	-15.415	-14.578	-13.281	-12.004	-10.429	-8.45	-6.063	-3.263	-0.048	3.581
3,3'-oxybis-propanenitrile	1656-48-0		-133.115	-128.88	-124.125	-118.864	-113.114	-106.897	-100.237	-93.166	-85.721	-77.949	-69.909	-61.674	-53.338	-45.013	-36.839	-28.979	-21.618	-14.952	-9.168	-4.42	-0.808	1.645	2.992	1.996	0.334	-1.376	-3.135	-4.932	-6.741	-8.524	-10.233	-11.818	-13.224	-14.399	-15.293	-15.861	-16.06	-15.856	-15.218	-14.118	-13.015	-11.59	-9.735	-7.44	-4.695	-1.493	2.172
3,3,3-trichloro-1-propene	2233-00-3		234.478	217.229	200.61	184.618	169.253	154.514	140.397	126.903	114.029	101.772	90.131	79.103	68.687	58.878	49.674	41.072	33.067	25.657	18.837	12.602	6.949	1.87	-2.638	-6.583	-9.97	-12.806	-15.098	-16.853	-18.08	-18.785	-18.977	-18.664	-17.854	-16.555	-14.773	-12.517	-9.794	-6.607	-2.964	1.132	5.439	10.073	15.072	20.425	26.127	32.173	38.561
3,3-diethylpentane	1067-20-5		270.173	251.201	232.877	215.198	198.166	181.78	166.04	150.945	136.495	122.69	109.531	97.015	85.144	73.918	63.335	53.396	44.101	35.449	27.44	20.074	13.352	7.271	1.834	-2.961	-7.114	-10.625	-13.493	-15.72	-17.304	-18.247	-18.548	-18.207	-17.225	-15.601	-13.336	-10.428	-6.88	-2.689	2.143	7.617	13.732	20.489	27.888	35.93	44.613	53.938	63.905
3,3-dimethyl-1-pentene	3404-73-7		225.926	210.589	195.714	181.299	167.347	153.859	140.837	128.285	116.206	104.605	93.487	82.858	72.723	63.089	53.96	45.345	37.248	29.677	22.637	16.134	10.174	4.762	-0.096	-4.418	-8.179	-11.365	-13.972	-16	-17.443	-18.301	-18.57	-18.248	-17.332	-15.82	-13.71	-11	-7.688	-3.772	0.749	5.878	11.616	17.964	24.924	32.497	40.685	49.488	58.908
3,3-dimethylhexane	563-16-6		269.2	250.285	232.016	214.392	197.413	181.079	165.39	150.344	135.942	122.184	109.07	96.598	84.769	73.582	63.038	53.136	43.875	35.256	27.279	19.942	13.247	7.193	1.779	-2.994	-7.127	-10.619	-13.472	-15.683	-17.255	-18.187	-18.478	-18.13	-17.141	-15.513	-13.244	-10.335	-6.786	-2.596	2.234	7.704	13.816	20.568	27.961	35.996	44.672	53.989	63.948
3,3-dimethylpentane	562-49-2		269.755	250.798	232.489	214.827	197.811	181.443	165.72	150.644	136.212	122.427	109.285	96.789	84.937	73.729	63.164	53.243	43.965	35.33	27.338	19.988	13.28	7.214	1.79	-2.993	-7.134	-10.634	-13.492	-15.71	-17.287	-18.223	-18.519	-18.173	-17.187	-15.561	-13.294	-10.386	-6.838	-2.649	2.181	7.652	13.764	20.517	27.911	35.946	44.623	53.942	63.903
3,4-dichloro-1-butene	760-23-6		195.556	180.153	165.371	151.208	137.662	124.73	112.408	100.694	89.585	79.076	69.162	59.839	51.101	42.943	35.356	28.334	21.867	15.947	10.563	5.704	1.358	-2.489	-5.852	-8.744	-11.182	-13.181	-14.758	-15.929	-16.708	-17.109	-17.145	-16.826	-16.159	-15.149	-13.797	-12.102	-10.059	-7.661	-4.897	-1.755	1.459	4.943	8.772	12.958	17.518	22.466	27.816
3,4,4-trimethyl-3-pentanol	7294-05-05		-283.521	-270.352	-256.65	-242.429	-227.71	-212.512	-196.86	-180.781	-164.306	-147.475	-130.339	-112.97	-95.479	-78.041	-60.941	-44.628	-29.767	-17.198	-7.733	-1.793	0.836	0.896	-0.705	-4.028	-7.388	-10.299	-12.734	-14.675	-16.103	-17.004	-17.367	-17.181	-16.439	-15.137	-13.268	-10.832	-7.826	-4.25	-0.105	4.609	9.437	14.387	19.311	23.885	27.656	30.057	30.49
3,4-dichlorotoluene	95-75-0		225.798	209.179	193.17	177.767	162.97	148.776	135.184	122.192	109.798	97.998	86.79	76.173	66.142	56.694	47.826	39.535	31.817	24.667	18.082	12.056	6.586	1.666	-2.709	-6.545	-9.846	-12.618	-14.867	-16.598	-17.818	-18.531	-18.742	-18.457	-17.68	-16.416	-14.668	-12.44	-9.734	-6.552	-2.895	1.237	5.746	10.687	16.075	21.91	28.193	34.923	42.103
3,4-dihydro-1h-isoquinoline	91-21-4		-671.169	-639.822	-607.879	-575.35	-542.245	-508.58	-474.372	-439.645	-404.427	-368.754	-332.673	-296.242	-259.54	-222.673	-185.805	-149.215	-113.445	-79.581	-49.653	-26.518	-12.155	-5.669	-4.196	-6.247	-8.711	-10.897	-12.781	-14.34	-15.555	-16.404	-16.87	-16.936	-16.587	-15.808	-14.587	-12.91	-10.768	-8.15	-5.048	-1.454	2.484	6.84	11.637	16.864	22.509	28.56	35
3,4-dihydro-2h-1-benzopyran	493-08-3		-32.558	-32.019	-30.925	-29.298	-27.166	-24.569	-21.558	-18.2	-14.584	-10.823	-7.057	-3.451	-0.188	2.547	4.59	5.829	6.22	5.798	4.665	2.97	0.877	-1.453	-3.876	-6.68	-9.313	-11.581	-13.48	-15.006	-16.153	-16.912	-17.273	-17.224	-16.754	-15.849	-14.498	-12.685	-10.4	-7.629	-4.36	-0.582	3.716	8.544	13.91	19.824	26.293	33.323	40.922
3,4-dimethylchlorobenzene	615-60-1		217.47	201.35	185.835	170.923	156.61	142.894	129.773	117.241	105.297	93.935	83.152	72.944	63.306	54.233	45.721	37.764	30.358	23.496	17.174	11.385	6.125	1.388	-2.831	-6.538	-9.737	-12.433	-14.63	-16.331	-17.54	-18.259	-18.489	-18.233	-17.49	-16.26	-14.543	-12.337	-9.64	-6.449	-2.761	1.428	6.098	11.266	16.942	23.129	29.832	37.055	44.801
3,4-dimethylpyridine	583-58-4		-561.25	-536.007	-510.239	-483.96	-457.185	-429.928	-402.21	-374.049	-345.471	-316.502	-287.178	-257.54	-227.645	-197.574	-167.454	-137.498	-108.09	-79.935	-54.251	-32.804	-17.312	-8.274	-4.51	-5.912	-8.254	-10.429	-12.385	-14.074	-15.454	-16.485	-17.135	-17.376	-17.184	-16.538	-15.421	-13.818	-11.717	-9.105	-5.974	-2.314	1.879	6.614	11.898	17.735	24.131	31.091	38.618
3,5,5-trimethylhexanal	5435-64-3		-157.528	-152.055	-146.061	-139.558	-132.563	-125.093	-117.168	-108.814	-100.059	-90.943	-81.516	-71.845	-62.027	-52.194	-42.529	-33.28	-24.758	-17.315	-11.293	-6.936	-4.314	-3.29	-3.57	-5.915	-8.583	-10.97	-13.037	-14.745	-16.062	-16.956	-17.402	-17.376	-16.86	-15.836	-14.292	-12.216	-9.599	-6.433	-2.714	1.565	6.406	11.814	17.79	24.338	31.458	39.152	47.423
3,4-hexanedione	4437-51-8		-69.509	-68.76	-67.524	-65.812	-63.642	-61.031	-58.001	-54.579	-50.795	-46.687	-42.301	-37.697	-32.946	-28.139	-23.385	-18.819	-14.588	-10.853	-7.764	-5.442	-3.955	-3.303	-3.415	-5.336	-7.625	-9.716	-11.585	-13.2	-14.532	-15.546	-16.213	-16.501	-16.382	-15.833	-14.829	-13.351	-11.382	-8.907	-5.913	-2.389	1.663	6.259	11.406	17.11	23.375	30.207	37.609
3,5-dimethylpyridine	591-22-0		-549.657	-524.9	-499.617	-473.82	-447.525	-420.749	-393.512	-365.834	-337.742	-309.264	-280.437	-251.305	-221.929	-192.393	-162.829	-133.459	-104.679	-77.204	-52.253	-31.54	-16.679	-8.074	-4.544	-6.023	-8.406	-10.611	-12.585	-14.281	-15.654	-16.668	-17.289	-17.49	-17.246	-16.538	-15.348	-13.662	-11.466	-8.751	-5.507	-1.726	2.596	7.466	12.892	18.879	25.429	32.549	40.241
3,6-dioxaoctane	629-14-1		-343.457	-327.892	-312.19	-296.332	-280.299	-264.062	-247.598	-230.881	-213.893	-196.622	-179.066	-161.237	-143.167	-124.918	-106.598	-88.388	-70.583	-53.637	-38.203	-25.081	-15.013	-8.369	-4.933	-6.265	-8.633	-10.826	-12.79	-14.474	-15.831	-16.815	-17.387	-17.512	-17.161	-16.307	-14.93	-13.01	-10.533	-7.486	-3.859	0.358	5.172	10.588	16.613	23.25	30.504	38.378	46.874
3,6-dimethyl-3-octanol	151-19-9		-304.357	-289.996	-275.103	-259.692	-243.781	-227.39	-210.542	-193.263	-175.584	-157.544	-139.195	-120.607	-101.891	-83.22	-64.884	-47.356	-31.35	-17.801	-7.633	-1.331	1.368	1.324	-0.442	-3.864	-7.288	-10.251	-12.727	-14.694	-16.136	-17.038	-17.387	-17.176	-16.398	-15.047	-13.12	-10.615	-7.532	-3.871	0.367	5.177	10.132	15.226	20.305	25.039	28.959	31.466	31.915
3-(dimethylamino)-1-propanol	3179-63-3		-496.799	-475.676	-454.166	-432.264	-409.966	-387.268	-364.166	-340.662	-316.758	-292.462	-267.786	-242.747	-217.376	-191.716	-165.841	-139.873	-114.03	-88.71	-64.622	-42.925	-25.162	-12.674	-5.702	-6.001	-7.964	-9.933	-11.817	-13.528	-14.987	-16.125	-16.883	-17.212	-17.072	-16.43	-15.262	-13.545	-11.265	-8.408	-4.963	-0.924	3.688	8.882	14.652	20.984	27.846	35.187	42.915
3-(methylthio)-propanal	3268-49-3		-123.171	-119.06	-114.471	-109.424	-103.939	-98.044	-91.768	-85.145	-78.219	-71.037	-63.662	-56.167	-48.645	-41.207	-33.99	-27.151	-20.865	-15.314	-10.66	-7.024	-4.461	-2.948	-2.386	-3.882	-5.857	-7.713	-9.439	-11.016	-12.417	-13.613	-14.569	-15.252	-15.626	-15.659	-15.318	-14.576	-13.405	-11.782	-9.686	-7.099	-4.03	-0.45	3.66	8.309	13.507	19.26	25.577
3-bromopropene	106-95-6		190.489	175.583	161.291	147.61	134.538	122.07	110.202	98.929	88.246	78.147	68.627	59.677	51.29	43.457	36.169	29.415	23.185	17.465	12.244	7.506	3.239	-0.573	-3.946	-6.893	-9.43	-11.571	-13.327	-14.711	-15.731	-16.393	-16.702	-16.659	-16.261	-15.505	-14.383	-12.886	-11.002	-8.72	-6.025	-2.902	0.525	4.355	8.627	13.354	18.549	24.223	30.389
3-bromopentane	1809-10-5		202.374	187.377	172.966	159.134	145.876	133.185	121.056	109.48	98.45	87.96	78.002	68.568	59.649	51.24	43.332	35.919	28.994	22.551	16.586	11.093	6.07	1.514	-2.576	-6.2	-9.358	-12.047	-14.265	-16.008	-17.272	-18.051	-18.341	-18.134	-17.426	-16.21	-14.478	-12.226	-9.446	-6.132	-2.279	2.119	7.067	12.571	18.636	25.265	32.464	40.235	48.583
3-bromopyridine	626-55-1		-392.456	-373.672	-354.384	-334.607	-314.355	-293.646	-272.501	-250.944	-229.003	-206.715	-184.127	-161.307	-138.358	-115.443	-92.838	-71.002	-50.668	-32.873	-18.761	-9.089	-3.745	-1.815	-2.113	-4.59	-7.276	-9.628	-11.631	-13.273	-14.544	-15.436	-15.941	-16.055	-15.773	-15.091	-14.005	-12.513	-10.611	-8.296	-5.562	-2.406	0.924	4.581	8.615	13.03	17.831	23.024	28.616
3-bromotoluene	591-17-3		216.335	200.311	184.891	170.072	155.851	142.226	129.194	116.751	104.895	93.62	82.924	72.802	63.25	54.262	45.833	37.958	30.631	23.846	17.598	11.878	6.682	2.003	-2.167	-5.833	-9.002	-11.68	-13.872	-15.583	-16.819	-17.583	-17.877	-17.706	-17.069	-15.967	-14.401	-12.37	-9.87	-6.899	-3.454	0.469	4.839	9.683	15.012	20.832	27.147	33.964	41.288
3-butenenitrile	109-75-1		-124.255	-120.372	-115.945	-110.987	-105.515	-99.549	-93.113	-86.241	-78.972	-71.36	-63.475	-55.41	-47.283	-39.247	-31.489	-24.23	-17.707	-12.146	-7.723	-4.526	-2.54	-1.647	-1.658	-3.311	-5.281	-7.101	-8.762	-10.252	-11.554	-12.65	-13.517	-14.134	-14.478	-14.525	-14.253	-13.638	-12.661	-11.301	-9.539	-7.357	-5.171	-2.716	0.102	3.29	6.86	10.821	15.182
3-butenoicacid	625-38-7		-87.388	-84.902	-81.949	-78.544	-74.706	-70.459	-65.828	-60.846	-55.554	-50.003	-44.261	-38.41	-32.557	-26.829	-21.38	-16.377	-11.988	-8.364	-5.609	-3.764	-2.794	-2.6	-3.036	-4.883	-6.932	-8.727	-10.26	-11.518	-12.489	-13.158	-13.509	-13.527	-13.196	-12.501	-11.427	-9.962	-8.093	-5.811	-3.107	0.026	2.364	3.554	2.657	-1.898	-11.632	-27.071	-47.342
3-butenylbenzene	768-56-9		194.328	179.768	165.771	152.334	139.454	127.127	115.347	104.111	93.413	83.248	73.61	64.492	55.889	47.792	40.196	33.092	26.475	20.336	14.67	9.47	4.73	0.445	-3.388	-6.791	-9.75	-12.26	-14.322	-15.936	-17.099	-17.81	-18.065	-17.858	-17.184	-16.038	-14.412	-12.299	-9.692	-6.584	-2.966	1.168	5.827	11.016	16.744	23.016	29.84	37.22	45.162
3-butyn-1-ol	927-74-2		-220.477	-210.332	-199.621	-188.357	-176.554	-164.233	-151.418	-138.145	-124.459	-110.43	-96.156	-81.784	-67.528	-53.692	-40.685	-29.004	-19.159	-11.539	-6.275	-3.187	-1.867	-1.825	-2.607	-4.576	-6.618	-8.382	-9.874	-11.098	-12.054	-12.742	-13.156	-13.289	-13.131	-12.672	-11.898	-10.795	-9.349	-7.545	-5.368	-2.806	-1.199	-0.245	-0.05	-1.05	-3.747	-8.621	-15.988
3-butyn-2-ol	2028-63-9		-176.128	-167.761	-158.841	-149.383	-139.406	-128.935	-118.002	-106.653	-94.951	-82.983	-70.876	-58.808	-47.026	-35.855	-25.692	-16.96	-10.022	-5.07	-2.063	-0.741	-0.72	-1.593	-3.006	-5.263	-7.474	-9.353	-10.904	-12.129	-13.03	-13.607	-13.859	-13.785	-13.382	-12.648	-11.578	-10.169	-8.416	-6.315	-3.861	-1.051	0.376	0.698	-0.283	-3.145	-8.453	-16.589	-27.594
3-chloro-1,2-propanediol	96-24-2		-210.178	-200.424	-190.191	-179.491	-168.341	-156.759	-144.772	-132.412	-119.724	-106.769	-93.632	-80.436	-67.35	-54.611	-42.533	-31.499	-21.922	-14.16	-8.413	-4.654	-2.638	-1.99	-2.306	-4.186	-6.236	-7.99	-9.455	-10.636	-11.536	-12.155	-12.494	-12.547	-12.311	-11.776	-10.932	-9.768	-8.271	-6.426	-4.219	-1.636	-0.036	0.809	0.708	-0.885	-4.57	-10.854	-19.973
3-chloro-1-propanol	627-30-5		-231.666	-220.446	-208.69	-196.414	-183.638	-170.385	-156.684	-142.573	-128.103	-113.344	-98.397	-83.41	-68.598	-54.267	-40.835	-28.815	-18.741	-11.025	-5.801	-2.871	-1.791	-2.03	-3.1	-5.299	-7.53	-9.453	-11.072	-12.388	-13.398	-14.097	-14.479	-14.536	-14.255	-13.624	-12.629	-11.257	-9.493	-7.322	-4.732	-1.71	0.855	2.993	4.447	4.659	2.954	-1.315	-8.53
3-chloro-2-methyl-1-propene	563-47-3		196.214	181.08	166.558	152.644	139.334	126.624	114.508	102.982	92.04	81.675	71.881	62.65	53.975	45.848	38.259	31.199	24.659	18.629	13.098	8.055	3.491	-0.605	-4.243	-7.432	-10.181	-12.498	-14.388	-15.857	-16.908	-17.545	-17.766	-17.571	-16.958	-15.922	-14.458	-12.56	-10.22	-7.43	-4.181	-0.465	3.667	8.26	13.334	18.897	24.957	31.523	38.6
3-chloro-2-(chloromethyl)-1-propene	1871-57-4		196.318	180.894	166.091	151.907	138.339	125.385	113.041	101.304	90.171	79.637	69.698	60.349	51.584	43.398	35.783	28.731	22.234	16.283	10.867	5.976	1.596	-2.285	-5.681	-8.607	-11.079	-13.111	-14.72	-15.921	-16.73	-17.158	-17.218	-16.92	-16.271	-15.275	-13.933	-12.243	-10.201	-7.798	-5.025	-1.87	1.417	5.01	8.975	13.327	18.082	23.257	28.868
3-chlorobenzeneamine	108-42-9		-129.453	-121.982	-113.947	-105.364	-96.257	-86.66	-76.626	-66.229	-55.586	-44.867	-34.323	-24.297	-15.226	-7.591	-1.809	1.9	3.6	3.61	2.384	0.38	-2.015	-4.516	-6.928	-9.366	-11.473	-13.146	-14.401	-15.26	-15.741	-15.867	-15.66	-15.142	-14.336	-13.261	-11.937	-10.379	-8.6	-6.607	-4.405	-1.992	-0.488	0.595	1.426	1.992	2.299	2.376	2.267
3-chloropropanenitrile	542-76-7		-92.363	-89.473	-86.055	-82.128	-77.714	-72.842	-67.55	-61.885	-55.909	-49.702	-43.366	-37.028	-30.838	-24.972	-19.611	-14.929	-11.062	-8.089	-6.012	-4.762	-4.216	-4.221	-4.622	-5.943	-7.321	-8.461	-9.383	-10.11	-10.662	-11.054	-11.299	-11.405	-11.373	-11.197	-10.866	-10.36	-9.656	-8.725	-7.536	-6.057	-5.15	-4.24	-3.114	-1.734	-0.065	1.93	4.28
3-chloropentane	616-20-6		202.732	187.698	173.253	159.391	146.105	133.39	121.237	109.641	98.592	88.085	78.11	68.659	59.726	51.301	43.379	35.951	29.011	22.553	16.573	11.067	6.031	1.464	-2.635	-6.266	-9.427	-12.115	-14.328	-16.061	-17.308	-18.065	-18.325	-18.081	-17.328	-16.058	-14.265	-11.942	-9.082	-5.68	-1.729	2.775	7.84	13.469	19.667	26.439	33.789	41.721	50.237
3-chlorophenylisocyanate	2909-38-8		197.884	183.367	169.38	155.921	142.985	130.571	118.677	107.3	96.437	86.087	76.247	66.915	58.09	49.769	41.95	34.631	27.809	21.482	15.647	10.302	5.442	1.066	-2.832	-6.256	-9.208	-11.694	-13.719	-15.287	-16.404	-17.073	-17.3	-17.089	-16.445	-15.37	-13.869	-11.942	-9.593	-6.821	-3.627	-0.008	3.786	7.891	12.348	17.157	22.314	27.82	33.674
3-chlorotoluene	108-41-8		217.188	200.998	185.419	170.447	156.08	142.316	129.151	116.583	104.609	93.225	82.427	72.211	62.573	53.509	45.012	37.079	29.704	22.881	16.604	10.867	5.663	0.986	-3.17	-6.812	-9.946	-12.579	-14.716	-16.363	-17.526	-18.208	-18.414	-18.147	-17.408	-16.2	-14.522	-12.375	-9.757	-6.666	-3.1	0.946	5.434	10.394	15.837	21.769	28.193	35.117	42.544
3-chloropropanoylchloride	625-36-5		181.839	167.289	153.324	139.943	127.144	114.925	103.284	92.219	81.728	71.808	62.457	53.672	45.448	37.782	30.67	24.106	18.084	12.597	7.637	3.195	-0.74	-4.181	-7.141	-9.646	-11.705	-13.332	-14.55	-15.381	-15.847	-15.973	-15.783	-15.299	-14.541	-13.525	-12.265	-10.766	-9.033	-7.06	-4.838	-2.352	-0.323	1.682	3.825	6.134	8.637	11.367	14.356
3-cyclohexene-1-carboxaldehyde	100-50-5		-146.405	-141.69	-136.459	-130.725	-124.503	-117.812	-110.672	-103.108	-95.153	-86.846	-78.239	-69.4	-60.423	-51.429	-42.583	-34.093	-26.215	-19.23	-13.412	-8.967	-5.986	-4.408	-4.045	-5.868	-8.134	-10.211	-12.067	-13.67	-14.983	-15.974	-16.61	-16.859	-16.693	-16.089	-15.022	-13.474	-11.428	-8.867	-5.779	-2.154	2.019	6.747	12.039	17.9	24.335	31.35	38.948
3-dimethylaminopropylamine	109-55-7		-834.532	-796.738	-758.369	-719.433	-679.941	-639.907	-599.346	-558.281	-516.74	-474.758	-432.382	-389.674	-346.715	-303.612	-260.512	-217.621	-175.252	-133.936	-94.686	-59.454	-31.359	-13.211	-4.679	-5.262	-7.538	-9.722	-11.73	-13.484	-14.923	-15.993	-16.651	-16.862	-16.601	-15.845	-14.579	-12.791	-10.471	-7.613	-4.212	-0.266	4.081	8.897	14.201	19.982	26.228	32.925	40.059
3-ethenyl-7-oxabicyclo[4,1,0]heptane	106-86-5		-200.915	-192.638	-183.899	-174.717	-165.108	-155.093	-144.694	-133.937	-122.852	-111.478	-99.862	-88.072	-76.203	-64.386	-52.812	-41.74	-31.506	-22.5	-15.108	-9.613	-6.096	-4.401	-4.194	-6.272	-8.746	-10.974	-12.923	-14.558	-15.848	-16.76	-17.267	-17.343	-16.963	-16.107	-14.757	-12.897	-10.512	-7.591	-4.123	-0.098	4.491	9.651	15.388	21.708	28.615	36.114	44.207
3-ethyl-1-heptanol	3525-25-5		-284.958	-271.846	-258.191	-244.006	-229.303	-214.101	-198.418	-182.279	-165.713	-148.76	-131.472	-113.925	-96.236	-78.588	-61.278	-44.768	-29.736	-17.037	-7.488	-1.505	1.139	1.199	-0.409	-3.72	-7.068	-9.973	-12.408	-14.347	-15.772	-16.667	-17.018	-16.816	-16.052	-14.722	-12.821	-10.349	-7.304	-3.688	0.496	5.244	10.033	14.826	19.401	23.296	25.869	26.35	24.021
3-ethyl-1-pentene	4038-04-04		241.696	224.955	208.747	193.072	177.935	163.337	149.28	135.768	122.804	110.389	98.528	87.221	76.474	66.287	56.664	47.608	39.121	31.206	23.865	17.102	10.918	5.316	0.299	-4.138	-7.986	-11.242	-13.904	-15.969	-17.437	-18.306	-18.574	-18.24	-17.302	-15.759	-13.61	-10.853	-7.487	-3.51	1.077	6.277	12.09	18.518	25.562	33.221	41.498	50.392	59.906
3-ethyl-1-pentyn-3-ol	6285-06-09		-163.577	-155.38	-146.665	-137.453	-127.767	-117.635	-107.094	-96.193	-84.993	-73.58	-62.073	-50.64	-39.51	-28.99	-19.459	-11.336	-4.993	-0.651	1.702	2.31	1.566	-0.1	-2.302	-5.297	-8.174	-10.639	-12.683	-14.297	-15.473	-16.205	-16.488	-16.317	-15.69	-14.605	-13.063	-11.066	-8.616	-5.718	-2.378	1.397	4.308	6.489	7.703	7.385	4.925	-0.178	-8.129
3-ethyl-2,2-dimethyl-pentane	16747-32-3		268.813	249.923	231.677	214.076	197.12	180.808	165.139	150.114	135.732	121.993	108.896	96.441	84.629	73.458	62.929	53.04	43.793	35.186	27.22	19.893	13.207	7.161	1.754	-3.014	-7.142	-10.631	-13.481	-15.693	-17.265	-18.199	-18.494	-18.151	-17.169	-15.548	-13.289	-10.392	-6.855	-2.681	2.133	7.585	13.676	20.406	27.775	35.784	44.432	53.719	63.646
3-ethyl-2,4-dimethylpentane	1068-87-7		269.616	250.681	232.392	214.748	197.749	181.395	165.686	150.621	136.2	122.423	109.29	96.8	84.954	73.75	63.19	53.272	43.996	35.363	27.372	20.023	13.315	7.249	1.825	-2.958	-7.1	-10.601	-13.46	-15.679	-17.256	-18.193	-18.488	-18.143	-17.157	-15.53	-13.263	-10.354	-6.804	-2.614	2.218	7.691	13.805	20.56	27.957	35.995	44.675	53.997	63.961
3-ethyl-2-methyl-1-pentene	19780-66-6		223.886	209.697	195.762	182.096	168.715	155.642	142.899	130.509	118.497	106.886	95.699	84.954	74.672	64.87	55.562	46.763	38.484	30.736	23.529	16.87	10.768	5.228	0.256	-4.155	-7.988	-11.233	-13.889	-15.953	-17.422	-18.295	-18.568	-18.24	-17.309	-15.773	-13.629	-10.877	-7.513	-3.538	1.051	6.255	12.076	18.515	25.572	33.25	41.549	50.47	60.015
3-ethyl-3-methylpentane	1067-08-9		269.911	250.951	232.638	214.972	197.952	181.578	165.85	150.767	136.33	122.537	109.389	96.886	85.026	73.811	63.239	53.31	44.025	35.383	27.383	20.026	13.312	7.239	1.809	-2.98	-7.127	-10.632	-13.495	-15.718	-17.298	-18.238	-18.537	-18.194	-17.21	-15.585	-13.319	-10.412	-6.863	-2.674	2.157	7.629	13.743	20.498	27.894	35.933	44.613	53.935	63.9
3-ethyl-3-pentanol	597-49-9		-314.68	-300.26	-285.302	-269.822	-253.838	-237.369	-220.439	-203.075	-185.306	-167.169	-148.713	-130.001	-111.127	-92.24	-73.584	-55.557	-38.784	-24.128	-12.546	-4.714	-0.636	0.375	-0.682	-3.841	-7.138	-10.012	-12.433	-14.375	-15.817	-16.741	-17.131	-16.977	-16.269	-14.999	-13.164	-10.759	-7.783	-4.236	-0.117	4.571	9.358	14.253	19.106	23.59	27.252	29.529	29.827
3-ethylheptane	15869-80-4		270.093	251.126	232.805	215.13	198.102	181.719	165.982	150.89	136.444	122.643	109.486	96.975	85.107	73.884	63.305	53.371	44.08	35.432	27.428	20.067	13.35	7.276	1.844	-2.944	-7.09	-10.594	-13.454	-15.673	-17.249	-18.182	-18.474	-18.123	-17.13	-15.495	-13.217	-10.298	-6.737	-2.533	2.313	7.8	13.93	20.703	28.117	36.174	44.873	54.215	64.199
3-ethylpyridine	536-78-7		-536.691	-512.384	-487.551	-462.207	-436.365	-410.042	-383.256	-356.029	-328.386	-300.354	-271.97	-243.278	-214.339	-185.24	-156.123	-127.227	-98.984	-72.172	-48.085	-28.457	-14.761	-7.138	-4.255	-5.93	-8.381	-10.618	-12.595	-14.272	-15.611	-16.582	-17.157	-17.312	-17.029	-16.291	-15.083	-13.394	-11.213	-8.532	-5.342	-1.636	2.577	7.311	12.576	18.374	24.71	31.59	39.015
3-ethylpentane	617-78-7		271.086	252.044	233.651	215.908	198.814	182.37	166.574	151.427	136.929	123.078	109.875	97.32	85.412	74.151	63.537	53.569	44.247	35.572	27.542	20.157	13.418	7.323	1.874	-2.931	-7.092	-10.608	-13.48	-15.709	-17.294	-18.236	-18.535	-18.19	-17.202	-15.572	-13.299	-10.383	-6.825	-2.624	2.219	7.705	13.832	20.602	28.015	36.069	44.766	54.105	64.086
3-ethylthiophene	1795-01-3		207.533	192.179	177.409	163.22	149.607	136.566	124.093	112.184	100.834	90.037	79.79	70.087	60.922	52.291	44.188	36.607	29.543	22.99	16.944	11.399	6.35	1.793	-2.276	-5.863	-8.969	-11.599	-13.755	-15.44	-16.654	-17.4	-17.677	-17.487	-16.829	-15.702	-14.106	-12.038	-9.498	-6.483	-2.99	0.982	5.298	10.034	15.216	20.842	26.91	33.421	40.372
3-ethylstyrene	7525-62-4		204.806	189.505	174.795	160.673	147.135	134.176	121.79	109.974	98.722	88.028	77.887	68.291	59.236	50.714	42.719	35.244	28.283	21.829	15.876	10.417	5.448	0.962	-3.044	-6.575	-9.634	-12.224	-14.346	-16	-17.188	-17.908	-18.158	-17.936	-17.239	-16.063	-14.403	-12.255	-9.614	-6.474	-2.83	1.324	5.993	11.182	16.899	23.148	29.934	37.263	45.14
3-fluorobenzonitrile	403-54-3		-74.007	-71.934	-69.338	-66.235	-62.645	-58.594	-54.113	-49.247	-44.05	-38.594	-32.974	-27.309	-21.746	-16.461	-11.649	-7.504	-4.198	-1.846	-0.481	-0.052	-0.433	-1.453	-2.924	-5.282	-7.662	-9.758	-11.56	-13.057	-14.239	-15.097	-15.621	-15.802	-15.631	-15.101	-14.204	-12.933	-11.28	-9.239	-6.801	-3.961	-1.215	1.723	4.95	8.469	12.282	16.395	20.817
3-fluorotoluene	352-70-5		210.928	195.06	179.803	165.152	151.106	137.66	124.813	112.558	100.894	89.814	79.315	69.391	60.038	51.248	43.017	35.337	28.202	21.605	15.54	9.997	4.971	0.454	-3.561	-7.083	-10.116	-12.668	-14.745	-16.35	-17.49	-18.166	-18.381	-18.137	-17.433	-16.27	-14.644	-12.554	-9.996	-6.964	-3.455	0.539	4.973	9.882	15.283	21.181	27.582	34.493	41.919
3-heptanone	106-35-4		-223.092	-215.524	-207.403	-198.739	-189.541	-179.822	-169.596	-158.876	-147.684	-136.041	-123.978	-111.537	-98.777	-85.788	-72.701	-59.72	-47.141	-35.377	-24.944	-16.385	-10.116	-6.262	-4.594	-6.276	-8.667	-10.872	-12.836	-14.51	-15.843	-16.794	-17.325	-17.404	-17.003	-16.102	-14.68	-12.724	-10.22	-7.159	-3.532	0.667	5.443	10.801	16.744	23.275	30.397	38.112	46.421
3-hexanone	589-38-8		-230.899	-222.854	-214.262	-205.137	-195.489	-185.335	-174.689	-163.571	-152.002	-140.009	-127.625	-114.893	-101.875	-88.656	-75.365	-62.192	-49.417	-37.426	-26.708	-17.791	-11.103	-6.81	-4.741	-6.225	-8.505	-10.635	-12.559	-14.223	-15.575	-16.569	-17.165	-17.326	-17.022	-16.228	-14.924	-13.091	-10.717	-7.789	-4.298	-0.236	4.402	9.623	15.43	21.827	28.816	36.401	44.583
3-heptyne	2586-89-2		160.898	149.1	137.815	127.031	116.732	106.903	97.528	88.588	80.067	71.946	64.209	56.838	49.819	43.138	36.784	30.749	25.028	19.621	14.529	9.758	5.317	1.217	-2.527	-6.084	-9.265	-11.983	-14.231	-16	-17.282	-18.069	-18.351	-18.12	-17.366	-16.082	-14.258	-11.888	-8.965	-5.48	-1.429	3.195	8.397	14.182	20.554	27.518	35.077	43.235	51.994
3-hexyne	928-49-4		136.655	127.304	118.252	109.501	101.053	92.909	85.068	77.527	70.283	63.33	56.66	50.267	44.143	38.279	32.671	27.314	22.207	17.349	12.746	8.405	4.337	0.556	-2.923	-6.311	-9.369	-11.991	-14.169	-15.894	-17.158	-17.949	-18.257	-18.072	-17.384	-16.181	-14.455	-12.195	-9.393	-6.039	-2.128	2.35	7.4	13.028	19.24	26.04	33.434	41.425	50.017
3-hydroxy-3-methylbutanoicacid	625-08-1		-228.218	-216.846	-205.191	-193.291	-181.186	-168.918	-156.527	-144.055	-131.542	-119.028	-106.557	-94.175	-81.94	-69.93	-58.251	-47.055	-36.541	-26.962	-18.604	-11.74	-6.561	-3.116	-1.285	-2.511	-4.488	-6.366	-8.112	-9.689	-11.058	-12.178	-13.009	-13.517	-13.669	-13.435	-12.791	-11.715	-10.19	-8.201	-5.736	-2.787	0.068	2.833	5.242	6.683	6.203	2.565	-5.389
3-methoxy-1-propanamine	5332-73-0		-824.171	-786.04	-747.395	-708.248	-668.61	-628.495	-587.92	-546.905	-505.475	-463.66	-421.501	-379.052	-336.382	-293.593	-250.83	-208.319	-166.435	-125.843	-87.775	-54.362	-28.446	-11.923	-3.872	-4.291	-6.421	-8.516	-10.5	-12.298	-13.847	-15.087	-15.971	-16.456	-16.508	-16.1	-15.208	-13.813	-11.902	-9.462	-6.485	-2.963	0.945	5.324	10.198	15.56	21.4	27.707	34.47
3-methoxy-1-butanol	2517-43-3		-363.211	-347.926	-332.137	-315.858	-299.101	-281.88	-264.214	-246.122	-227.628	-208.76	-189.555	-170.059	-150.336	-130.476	-110.615	-90.962	-71.846	-53.767	-37.43	-23.684	-13.286	-6.547	-3.153	-4.472	-6.819	-9.019	-11.021	-12.773	-14.225	-15.332	-16.053	-16.352	-16.199	-15.565	-14.43	-12.774	-10.581	-7.84	-4.539	-0.67	3.613	8.324	13.415	18.762	24.161	29.288	33.653
3-methoxy-2-methyl-1-propene	22418-49-1		-235.989	-226.625	-216.682	-206.172	-195.108	-183.506	-171.387	-158.775	-145.701	-132.206	-118.343	-104.192	-89.862	-75.52	-61.404	-47.86	-35.35	-24.425	-15.622	-9.301	-5.492	-3.878	-3.934	-6.275	-8.939	-11.297	-13.324	-14.996	-16.287	-17.174	-17.633	-17.644	-17.187	-16.243	-14.796	-12.832	-10.336	-7.298	-3.706	0.448	5.174	10.479	16.369	22.85	29.928	37.607	45.892
3-methoxyaniline	536-90-3		-217.497	-206.253	-194.478	-182.19	-169.415	-156.184	-142.538	-128.534	-114.249	-99.791	-85.314	-71.029	-57.226	-44.282	-32.636	-22.736	-14.92	-9.314	-5.782	-3.985	-3.493	-3.888	-4.827	-6.684	-8.547	-10.121	-11.42	-12.452	-13.226	-13.745	-14.008	-14.013	-13.755	-13.225	-12.411	-11.303	-9.887	-8.15	-6.079	-3.66	-1.588	0.448	2.543	4.663	6.778	8.866	10.912
3-methoxyphenol	150-19-6		-10.503	-11.167	-11.348	-11.072	-10.372	-9.292	-7.884	-6.217	-4.372	-2.446	-0.552	1.191	2.662	3.752	4.377	4.492	4.094	3.224	1.957	0.39	-1.373	-3.229	-5.086	-7.312	-9.371	-11.069	-12.419	-13.429	-14.108	-14.463	-14.499	-14.218	-13.62	-12.705	-11.469	-9.911	-8.024	-5.806	-3.253	-0.362	1.053	0.44	-3.347	-11.806	-25.706	-44.517	-66.832
3-methoxypropanenitrile	110-67-8		-156.16	-151.362	-146.022	-140.149	-133.757	-126.861	-119.481	-111.64	-103.368	-94.703	-85.693	-76.404	-66.919	-57.351	-47.844	-38.585	-29.802	-21.758	-14.728	-8.957	-4.611	-1.736	-0.245	-1.46	-3.379	-5.27	-7.116	-8.888	-10.552	-12.065	-13.382	-14.459	-15.252	-15.72	-15.826	-15.537	-14.824	-13.663	-12.032	-9.912	-7.576	-4.844	-1.656	1.991	6.101	10.676	15.715
3-methyl-1-butanethiol	541-31-1		27.869	24.785	22.203	20.1	18.446	17.205	16.332	15.775	15.47	15.34	15.3	15.254	15.102	14.745	14.096	13.09	11.69	9.896	7.742	5.292	2.631	-0.143	-2.933	-6.077	-9.026	-11.566	-13.686	-15.374	-16.618	-17.407	-17.73	-17.577	-16.937	-15.803	-14.167	-12.022	-9.362	-6.183	-2.48	1.751	6.334	11.35	16.818	22.726	29.057	35.794	42.916
3-methyl-2-buten-1-ol	556-82-1		-312.392	-299.008	-285.072	-270.593	-255.583	-240.058	-224.033	-207.529	-190.572	-173.194	-155.438	-137.365	-119.062	-100.665	-82.388	-64.564	-47.704	-32.521	-19.854	-10.424	-4.501	-1.74	-1.368	-3.772	-6.591	-9.117	-11.314	-13.145	-14.58	-15.591	-16.154	-16.249	-15.858	-14.966	-13.562	-11.635	-9.177	-6.182	-2.645	1.437	5.54	9.707	13.802	17.495	20.317	21.666	20.889
3-methyl-2-butenal	107-86-8		-267.826	-257.998	-247.638	-236.76	-225.377	-213.505	-201.161	-188.365	-175.14	-161.515	-147.523	-133.205	-118.618	-103.838	-88.974	-74.186	-59.712	-45.895	-33.201	-22.192	-13.419	-7.242	-3.67	-4.506	-6.485	-8.472	-10.404	-12.216	-13.842	-15.218	-16.289	-17.004	-17.321	-17.201	-16.616	-15.54	-13.952	-11.836	-9.177	-5.965	-2.193	2.149	7.069	12.571	18.661	25.342	32.619
3-methyl-2-butanamine	598-74-3		-801.519	-765.757	-729.392	-692.432	-654.888	-616.772	-578.1	-538.892	-499.17	-458.965	-418.314	-377.264	-335.875	-294.226	-252.425	-210.631	-169.102	-128.335	-89.39	-54.483	-27.251	-10.728	-3.966	-5.284	-7.907	-10.327	-12.468	-14.266	-15.67	-16.64	-17.143	-17.157	-16.662	-15.647	-14.102	-12.02	-9.398	-6.233	-2.525	1.725	6.355	11.44	17.001	23.026	29.502	36.416	43.757
3-methyl-3-buten-2-one	814-78-8		-226.359	-218.299	-209.706	-200.592	-190.972	-180.86	-170.276	-159.241	-147.78	-135.924	-123.712	-111.191	-98.428	-85.512	-72.573	-59.798	-47.451	-35.893	-25.569	-16.955	-10.437	-6.175	-4.035	-5.423	-7.636	-9.731	-11.658	-13.365	-14.804	-15.929	-16.697	-17.072	-17.022	-16.52	-15.544	-14.075	-12.095	-9.594	-6.558	-2.979	1.14	5.812	11.044	16.842	23.21	30.151	37.669
3-methyl-2-thiabutane	1551-21-9		-27.504	-28.696	-29.314	-29.373	-28.888	-27.884	-26.389	-24.44	-22.085	-19.389	-16.43	-13.309	-10.148	-7.092	-4.301	-1.936	-0.146	0.96	1.327	0.97	-0.035	-1.562	-3.461	-6.23	-8.988	-11.404	-13.461	-15.139	-16.419	-17.28	-17.702	-17.667	-17.157	-16.156	-14.648	-12.62	-10.059	-6.956	-3.3	0.916	5.701	11.061	17.001	23.527	30.642	38.351	46.657
3-methyl-3-pentanol	77-74-7		-318.166	-304.048	-289.377	-274.167	-258.436	-242.202	-225.487	-208.317	-190.723	-172.741	-154.418	-135.816	-117.023	-98.176	-79.491	-61.319	-44.213	-28.958	-16.486	-7.563	-2.393	-0.476	-0.886	-3.798	-6.971	-9.758	-12.124	-14.038	-15.476	-16.416	-16.84	-16.735	-16.088	-14.891	-13.138	-10.823	-7.945	-4.501	-0.492	4.082	8.737	13.492	18.208	22.566	26.129	28.35	28.652
3-methylaniline	108-44-1		-239.393	-227.334	-214.695	-201.486	-187.718	-173.409	-158.58	-143.268	-127.522	-111.422	-95.092	-78.732	-62.65	-47.305	-33.322	-21.426	-12.255	-6.095	-2.745	-1.627	-2.036	-3.352	-5.115	-7.394	-9.528	-11.326	-12.794	-13.936	-14.754	-15.25	-15.425	-15.278	-14.807	-14.012	-12.89	-11.439	-9.656	-7.538	-5.083	-2.287	0.066	2.305	4.525	6.687	8.761	10.727	12.587
3-methyl-hexane	589-34-4		271.187	252.148	233.759	216.018	198.926	182.482	166.686	151.538	137.038	123.185	109.98	97.421	85.509	74.244	63.625	53.653	44.326	35.646	27.611	20.221	13.477	7.378	1.924	-2.885	-7.049	-10.568	-13.442	-15.672	-17.258	-18.199	-18.496	-18.149	-17.157	-15.521	-13.241	-10.317	-6.749	-2.536	2.321	7.822	13.967	20.756	28.19	36.269	44.992	54.359	64.371
3-methyl-cis-2-pentene	922-62-3		193.154	180.696	168.625	156.921	145.566	134.546	123.849	113.465	103.39	93.623	84.165	75.025	66.211	57.738	49.619	41.873	34.516	27.568	21.047	14.971	9.356	4.22	-0.424	-4.637	-8.332	-11.47	-14.047	-16.058	-17.498	-18.362	-18.647	-18.348	-17.461	-15.983	-13.911	-11.24	-7.969	-4.093	0.389	5.479	11.181	17.496	24.426	31.973	40.139	48.925	58.333
3-methyl-n-(3-methylbutyl)-1-butanamine	544-00-3		-704.747	-671.503	-637.672	-603.263	-568.293	-532.779	-496.742	-460.21	-423.217	-385.806	-348.031	-309.96	-271.681	-233.311	-195.011	-157.033	-119.833	-84.323	-52.329	-26.818	-10.542	-3.321	-2.124	-5.035	-8.328	-11.196	-13.603	-15.517	-16.915	-17.777	-18.088	-17.835	-17.01	-15.606	-13.617	-11.04	-7.872	-4.112	0.241	5.186	10.668	16.708	23.311	30.469	38.172	46.409	55.168
3-methyl-nonane	5911-04-06		269.67	250.742	232.459	214.819	197.824	181.473	165.765	150.701	136.28	122.503	109.369	96.878	85.029	73.823	63.26	53.34	44.062	35.426	27.432	20.08	13.371	7.303	1.877	-2.906	-7.048	-10.548	-13.406	-15.622	-17.197	-18.129	-18.42	-18.068	-17.075	-15.44	-13.162	-10.243	-6.681	-2.477	2.37	7.859	13.99	20.764	28.182	36.242	44.945	54.291	64.281
3-methylbutanal	590-86-3		-168.256	-162.839	-156.895	-150.437	-143.478	-136.037	-128.132	-119.786	-111.026	-101.884	-92.402	-82.638	-72.665	-62.589	-52.551	-42.748	-33.438	-24.934	-17.583	-11.701	-7.493	-4.984	-4.009	-5.725	-8.025	-10.153	-12.066	-13.721	-15.076	-16.091	-16.73	-16.96	-16.754	-16.088	-14.941	-13.296	-11.139	-8.457	-5.242	-1.484	2.823	7.686	13.108	19.094	25.649	32.774	40.475
3-methylanisole	100-84-5		3.898	2.672	1.982	1.798	2.085	2.793	3.863	5.216	6.756	8.368	9.921	11.271	12.276	12.811	12.782	12.148	10.919	9.16	6.97	4.47	1.787	-0.964	-3.677	-6.609	-9.313	-11.631	-13.563	-15.105	-16.254	-17.004	-17.348	-17.278	-16.783	-15.855	-14.481	-12.65	-10.352	-7.576	-4.31	-0.543	3.728	8.517	13.834	19.688	26.085	33.034	40.54
3-methylbenzonitrile	620-22-4		-111.149	-107.648	-103.617	-99.067	-94.015	-88.48	-82.486	-76.066	-69.26	-62.125	-54.733	-47.183	-39.603	-32.16	-25.061	-18.544	-12.861	-8.241	-4.843	-2.718	-1.794	-1.899	-2.8	-5.063	-7.5	-9.692	-11.616	-13.251	-14.573	-15.56	-16.193	-16.452	-16.319	-15.779	-14.816	-13.418	-11.574	-9.272	-6.504	-3.259	0.359	4.422	8.957	13.967	19.458	25.434	31.897
3-methylbutanoicacidethylester	108-64-5		-144.698	-141.09	-136.911	-132.168	-126.869	-121.024	-114.643	-107.743	-100.341	-92.463	-84.145	-75.436	-66.41	-57.172	-47.871	-38.718	-29.991	-22.035	-15.225	-9.894	-6.247	-4.282	-3.798	-5.867	-8.428	-10.744	-12.775	-14.479	-15.82	-16.762	-17.276	-17.333	-16.911	-15.989	-14.55	-12.58	-10.067	-7	-3.37	0.828	5.602	10.957	16.897	23.425	30.545	38.26	46.572
3-methylbenzoylchloride	1711-06-4		154.012	143.36	133.096	123.203	113.669	104.479	95.621	87.086	78.864	70.95	63.341	56.033	49.029	42.331	35.943	29.871	24.123	18.707	13.631	8.906	4.54	0.542	-3.078	-6.383	-9.294	-11.778	-13.834	-15.457	-16.647	-17.399	-17.71	-17.576	-16.994	-15.959	-14.467	-12.513	-10.093	-7.201	-3.833	0.017	4.305	9.066	14.312	20.049	26.281	33.013	40.249
3-methylbutanenitrile	625-28-5		-162.01	-156.912	-151.257	-145.057	-138.324	-131.075	-123.328	-115.106	-106.441	-97.37	-87.945	-78.234	-68.329	-58.355	-48.48	-38.926	-29.968	-21.922	-15.109	-9.792	-6.104	-4.008	-3.309	-4.957	-7.126	-9.166	-11.039	-12.702	-14.115	-15.237	-16.028	-16.454	-16.483	-16.09	-15.25	-13.945	-12.156	-9.872	-7.081	-3.772	-0.045	4.168	8.89	14.124	19.871	26.133	32.911
3-methylcyclohexanol	591-23-1		-302.389	-288.534	-274.147	-259.243	-243.84	-227.956	-211.615	-194.845	-177.679	-160.158	-142.335	-124.282	-106.105	-87.966	-70.119	-52.961	-37.086	-23.28	-12.375	-4.937	-0.954	0.171	-0.683	-3.712	-6.918	-9.715	-12.071	-13.962	-15.364	-16.261	-16.637	-16.48	-15.781	-14.533	-12.731	-10.371	-7.453	-3.977	0.057	4.645	9.21	13.758	18.109	21.868	24.509	25.416	24.012
3-methylcyclohexanone	591-24-2		-256.412	-247.081	-237.217	-226.832	-215.939	-204.552	-192.69	-180.371	-167.621	-154.47	-140.953	-127.118	-113.025	-98.759	-84.441	-70.245	-56.425	-43.34	-31.459	-21.321	-13.419	-8.021	-5.057	-6.155	-8.246	-10.255	-12.12	-13.78	-15.172	-16.241	-16.937	-17.217	-17.045	-16.39	-15.226	-13.534	-11.297	-8.5	-5.134	-1.189	3.341	8.463	14.18	20.496	27.415	34.939	43.07
3-methylheptane	589-81-1		270.594	251.599	233.251	215.55	198.496	182.088	166.327	151.212	136.743	122.92	109.743	97.21	85.323	74.081	63.484	53.532	44.224	35.561	27.542	20.167	13.436	7.349	1.907	-2.892	-7.048	-10.56	-13.428	-15.652	-17.233	-18.171	-18.465	-18.116	-17.123	-15.486	-13.207	-10.283	-6.716	-2.506	2.348	7.846	13.988	20.774	28.204	36.277	44.995	54.358	64.365
3-methylcyclohexene	591-48-0		176.63	165.398	154.542	144.036	133.857	123.98	114.387	105.059	95.984	87.155	78.568	70.226	62.137	54.314	46.773	39.535	32.622	26.056	19.862	14.063	8.683	3.743	-0.738	-4.845	-8.46	-11.529	-14.047	-16.007	-17.404	-18.234	-18.489	-18.167	-17.262	-15.769	-13.686	-11.009	-7.733	-3.857	0.623	5.71	11.406	17.712	24.632	32.167	40.319	49.089	58.478
3-methylstyrene	100-80-1		201.371	186.158	171.542	157.52	144.088	131.242	118.977	107.288	96.17	85.617	75.622	66.18	57.283	48.924	41.096	33.79	26.999	20.715	14.929	9.634	4.822	0.486	-3.382	-6.787	-9.735	-12.23	-14.276	-15.875	-17.027	-17.733	-17.992	-17.801	-17.157	-16.054	-14.489	-12.455	-9.945	-6.953	-3.471	0.508	4.992	9.987	15.502	21.543	28.118	35.232	42.892
3-methylpentanoic-acid	105-43-1		-97.719	-95.093	-91.97	-88.36	-84.275	-79.728	-74.737	-69.324	-63.519	-57.362	-50.909	-44.234	-37.442	-30.67	-24.097	-17.943	-12.454	-7.879	-4.421	-2.188	-1.166	-1.218	-2.121	-4.623	-7.314	-9.676	-11.682	-13.303	-14.515	-15.295	-15.624	-15.483	-14.859	-13.74	-12.118	-9.986	-7.341	-4.181	-0.509	3.673	7.383	10.259	11.416	9.322	2.306	-10.497	-28.491
3-methyloctane	2216-33-3		270.206	251.24	232.92	215.246	198.217	181.833	166.095	151.001	136.553	122.749	109.589	97.074	85.204	73.977	63.394	53.455	44.159	35.507	27.499	20.134	13.412	7.333	1.897	-2.895	-7.045	-10.551	-13.415	-15.636	-17.214	-18.149	-18.441	-18.09	-17.097	-15.46	-13.181	-10.259	-6.693	-2.485	2.367	7.862	14	20.782	28.207	36.276	44.989	54.345	64.345
3-methylundecane	1002-43-3		269.07	250.186	231.943	214.344	197.386	181.071	165.398	150.367	135.978	122.23	109.124	96.659	84.836	73.654	63.113	53.213	43.954	35.336	27.359	20.022	13.327	7.272	1.858	-2.915	-7.048	-10.539	-13.39	-15.6	-17.169	-18.097	-18.385	-18.031	-17.036	-15.4	-13.123	-10.204	-6.644	-2.442	2.401	7.887	14.014	20.783	28.194	36.248	44.944	54.283	64.264
3-octanone	106-68-3		-223.59	-215.615	-207.103	-198.063	-188.506	-178.445	-167.895	-156.872	-145.396	-133.494	-121.199	-108.556	-95.633	-82.526	-69.385	-56.43	-43.985	-32.487	-22.466	-14.445	-8.781	-5.509	-4.326	-6.232	-8.745	-11.034	-13.049	-14.74	-16.064	-16.98	-17.457	-17.464	-16.979	-15.982	-14.455	-12.388	-9.768	-6.587	-2.838	1.483	6.383	11.864	17.929	24.581	31.821	39.651	48.072
3-nonanone	925-78-0		-219.831	-211.92	-203.466	-194.48	-184.975	-174.963	-164.461	-153.485	-142.059	-130.207	-117.966	-105.385	-92.532	-79.513	-66.484	-53.682	-41.446	-30.233	-20.58	-12.998	-7.797	-4.957	-4.127	-6.194	-8.794	-11.146	-13.197	-14.902	-16.22	-17.113	-17.552	-17.509	-16.963	-15.896	-14.293	-12.142	-9.435	-6.162	-2.319	2.1	7.099	12.68	18.847	25.6	32.943	40.875	49.398
3-octanol	589-98-0		-288.417	-274.932	-260.928	-246.419	-231.424	-215.96	-200.052	-183.724	-167.01	-149.95	-132.595	-115.02	-97.338	-79.721	-62.451	-45.969	-30.925	-18.144	-8.436	-2.246	0.608	0.841	-0.643	-3.92	-7.257	-10.151	-12.575	-14.507	-15.927	-16.819	-17.171	-16.971	-16.213	-14.889	-12.995	-10.529	-7.489	-3.876	0.31	5.066	9.901	14.813	19.627	23.971	27.328	29.052	28.492
3-oxiranyl-7-oxabicyclo[4,1,0]heptane	106-87-6		-205.508	-198.313	-190.618	-182.436	-173.784	-164.679	-155.141	-145.192	-134.858	-124.169	-113.163	-101.886	-90.4	-78.788	-67.165	-55.695	-44.598	-34.169	-24.766	-16.775	-10.528	-6.208	-3.775	-4.946	-7.024	-9.02	-10.891	-12.589	-14.064	-15.266	-16.148	-16.667	-16.785	-16.467	-15.685	-14.413	-12.631	-10.321	-7.469	-4.063	-0.092	4.451	9.574	15.283	21.582	28.475	35.966
3-octyne	15232-76-5		159.284	147.914	137.028	126.608	116.64	107.106	97.987	89.265	80.922	72.939	65.3	57.988	50.991	44.298	37.902	31.799	25.99	20.479	15.273	10.383	5.823	1.61	-2.24	-5.887	-9.141	-11.919	-14.212	-16.012	-17.312	-18.103	-18.376	-18.124	-17.338	-16.012	-14.137	-11.706	-8.715	-5.156	-1.025	3.683	8.974	14.851	21.318	28.378	36.035	44.292	53.15
3-oxobutanoicacidbutylester	591-60-6		-131.269	-127.818	-123.845	-119.36	-114.378	-108.913	-102.985	-96.615	-89.828	-82.658	-75.146	-67.347	-59.334	-51.204	-43.088	-35.154	-27.615	-20.721	-14.737	-9.901	-6.375	-4.199	-3.278	-4.866	-7.032	-9.052	-10.894	-12.519	-13.89	-14.97	-15.723	-16.117	-16.121	-15.71	-14.861	-13.555	-11.776	-9.509	-6.744	-3.47	0.223	4.395	9.069	14.247	19.93	26.118	32.812
3-oxobutanoicacid-2-propenylester	1118-84-9		-113.229	-110.282	-106.825	-102.873	-98.443	-93.555	-88.229	-82.495	-76.383	-69.934	-63.199	-56.243	-49.148	-42.019	-34.988	-28.214	-21.885	-16.2	-11.353	-7.501	-4.735	-3.055	-2.377	-3.854	-5.837	-7.698	-9.423	-10.99	-12.37	-13.534	-14.449	-15.082	-15.401	-15.374	-14.974	-14.173	-12.948	-11.278	-9.144	-6.528	-3.549	-0.116	3.806	8.224	13.145	18.573	24.514
3-oxobutanoicacid-1-methylethylester	542-08-5		-137.135	-133.311	-128.978	-124.149	-118.837	-113.058	-106.829	-100.174	-93.117	-85.691	-77.938	-69.911	-61.681	-53.342	-45.017	-36.867	-29.094	-21.939	-15.66	-10.499	-6.633	-4.126	-2.91	-4.362	-6.464	-8.455	-10.301	-11.964	-13.405	-14.582	-15.456	-15.99	-16.149	-15.904	-15.227	-14.097	-12.493	-10.399	-7.801	-4.689	-1.145	2.89	7.44	12.508	18.097	24.207	30.84
3-phenyl-2-propenal	104-55-2		-220.823	-212.286	-203.225	-193.653	-183.582	-173.028	-162.012	-150.554	-138.684	-126.437	-113.859	-101.015	-87.996	-74.931	-62.008	-49.492	-37.736	-27.18	-18.284	-11.426	-6.769	-4.197	-3.357	-5.085	-7.31	-9.344	-11.161	-12.733	-14.034	-15.041	-15.729	-16.079	-16.071	-15.688	-14.916	-13.738	-12.142	-10.115	-7.645	-4.721	-1.436	2.282	6.462	11.112	16.239	21.852	27.957
3-phenyl-2-cyclopenten-1-one	3810-26-2		-292.776	-280.868	-268.462	-255.566	-242.194	-228.357	-214.073	-199.359	-184.236	-168.733	-152.885	-136.738	-120.36	-103.849	-87.359	-71.122	-55.491	-40.965	-28.177	-17.783	-10.246	-5.624	-3.537	-4.949	-7.108	-9.134	-10.988	-12.63	-14.022	-15.129	-15.92	-16.366	-16.442	-16.126	-15.398	-14.241	-12.638	-10.577	-8.044	-5.028	-1.579	2.347	6.77	11.698	17.136	23.091	29.567
3-pyridinemethanol	100-55-0		-391.333	-369.661	-347.664	-325.386	-302.877	-280.193	-257.4	-234.572	-211.794	-189.161	-166.778	-144.767	-123.27	-102.464	-82.581	-63.942	-46.97	-32.188	-20.12	-11.121	-5.205	-2.004	-0.907	-2.701	-5.03	-7.142	-9.019	-10.642	-11.991	-13.047	-13.791	-14.202	-14.264	-13.957	-13.266	-12.175	-10.668	-8.731	-6.352	-3.519	-0.66	2.271	5.164	7.726	9.52	9.946	8.299
3-pyridinemethanamine	3731-52-0		-677.696	-645.509	-612.771	-579.501	-545.72	-511.457	-476.745	-441.626	-406.149	-370.378	-334.389	-298.273	-262.144	-226.143	-190.457	-155.353	-121.252	-88.887	-59.508	-34.959	-17.086	-6.431	-1.673	-2.758	-4.969	-7.071	-9.026	-10.793	-12.337	-13.622	-14.618	-15.297	-15.635	-15.608	-15.197	-14.384	-13.153	-11.488	-9.377	-6.807	-4.04	-0.921	2.603	6.531	10.86	15.588	20.71
3-pyrroline	109-96-6		-758.297	-724.18	-689.449	-654.112	-618.181	-581.669	-544.593	-506.971	-468.832	-430.206	-391.135	-351.674	-311.891	-271.878	-231.766	-191.747	-152.154	-113.62	-77.438	-46.024	-22.633	-9.055	-3.605	-4.86	-7.237	-9.459	-11.468	-13.214	-14.654	-15.75	-16.468	-16.784	-16.674	-16.118	-15.101	-13.61	-11.633	-9.161	-6.187	-2.702	1.104	5.326	9.991	15.09	20.608	26.532	32.845
3-thiophenecarboxaldehyde	498-62-4		-171.644	-164.618	-157.15	-149.255	-140.954	-132.269	-123.223	-113.845	-104.17	-94.238	-84.104	-73.84	-63.542	-53.342	-43.417	-33.998	-25.363	-17.817	-11.644	-7.037	-4.039	-2.529	-2.254	-4.097	-6.326	-8.332	-10.096	-11.598	-12.817	-13.737	-14.34	-14.613	-14.543	-14.118	-13.329	-12.166	-10.623	-8.691	-6.363	-3.632	-0.976	1.861	4.962	8.321	11.933	15.795	19.907
4,4-dimethyl-1-pentene	762-62-9		216.433	201.969	187.92	174.283	161.059	148.248	135.851	123.874	112.321	101.198	90.514	80.275	70.49	61.169	52.32	43.953	36.077	28.7	21.831	15.479	9.65	4.352	-0.408	-4.652	-8.346	-11.476	-14.038	-16.027	-17.443	-18.281	-18.539	-18.213	-17.302	-15.803	-13.713	-11.03	-7.752	-3.877	0.598	5.674	11.353	17.637	24.528	32.027	40.135	48.855	58.188
4,4-dimethyl-2-pentanone	590-50-1		-229.788	-221.125	-211.91	-202.156	-191.878	-181.093	-169.82	-158.083	-145.912	-133.343	-120.423	-107.212	-93.797	-80.297	-66.886	-53.813	-41.423	-30.165	-20.544	-13.018	-7.846	-4.972	-4.048	-6.002	-8.508	-10.786	-12.789	-14.475	-15.805	-16.742	-17.255	-17.319	-16.908	-16.006	-14.594	-12.66	-10.192	-7.181	-3.619	0.501	5.183	10.434	16.256	22.653	29.629	37.186	45.328
4,4-dimethylcyclohexene	14072-86-7		191.527	179.625	168.025	156.71	145.665	134.879	124.347	114.068	104.044	94.285	84.803	75.613	66.734	58.187	49.992	42.171	34.746	27.738	21.166	15.05	9.406	4.25	-0.403	-4.611	-8.294	-11.417	-13.975	-15.964	-17.38	-18.219	-18.477	-18.15	-17.235	-15.729	-13.628	-10.93	-7.633	-3.733	0.772	5.883	11.603	17.934	24.878	32.435	40.608	49.399	58.807
4,5-dihydro-2-methylthiazole	2346-00-1		-426.726	-407.933	-388.608	-368.755	-348.383	-327.5	-306.117	-284.248	-261.911	-239.129	-215.935	-192.376	-168.523	-144.491	-120.466	-96.766	-73.921	-52.766	-34.446	-20.145	-10.523	-5.278	-3.355	-5.023	-7.328	-9.436	-11.319	-12.95	-14.301	-15.343	-16.05	-16.397	-16.36	-15.918	-15.05	-13.737	-11.962	-9.711	-6.968	-3.721	0.038	4.323	9.143	14.505	20.418	26.889	33.923
4-(1-methylethyl)pyridine	696-30-0		-547.182	-522.459	-497.209	-471.447	-445.187	-418.443	-391.235	-363.581	-335.506	-307.038	-278.209	-249.061	-219.653	-190.067	-160.435	-130.985	-102.133	-74.644	-49.822	-29.483	-15.244	-7.341	-4.397	-6.118	-8.619	-10.894	-12.895	-14.58	-15.91	-16.852	-17.381	-17.473	-17.109	-16.274	-14.954	-13.139	-10.82	-7.988	-4.637	-0.762	3.635	8.564	14.029	20.034	26.584	33.68	41.327
4-(aminomethyl)pyridine	3731-53-1		-641.812	-610.932	-579.536	-547.648	-515.299	-482.524	-449.363	-415.867	-382.094	-348.109	-313.99	-279.825	-245.714	-211.782	-178.188	-145.174	-113.138	-82.792	-55.352	-32.562	-16.085	-6.322	-2.004	-3.172	-5.382	-7.461	-9.373	-11.084	-12.559	-13.769	-14.686	-15.283	-15.538	-15.43	-14.939	-14.049	-12.744	-11.01	-8.834	-6.203	-3.394	-0.248	3.287	7.207	11.509	16.187	21.235
4-(tert-butyl)pyridine	3978-81-2		-542.362	-517.774	-492.658	-467.027	-440.896	-414.282	-387.204	-359.682	-331.742	-303.412	-274.727	-245.731	-216.484	-187.069	-157.624	-128.384	-99.777	-72.59	-48.152	-28.28	-14.526	-7.027	-4.354	-6.172	-8.721	-11.031	-13.054	-14.747	-16.073	-17	-17.502	-17.557	-17.146	-16.255	-14.87	-12.981	-10.579	-7.658	-4.211	-0.233	4.273	9.314	14.897	21.025	27.7	34.924	42.702
4-bromopyridine	1120-87-2		-441.75	-420.759	-399.269	-377.293	-354.847	-331.948	-308.616	-284.874	-260.747	-236.268	-211.48	-186.44	-161.231	-135.99	-110.941	-86.48	-63.276	-42.38	-25.143	-12.73	-5.396	-2.281	-1.993	-4.353	-7.024	-9.381	-11.404	-13.077	-14.387	-15.322	-15.873	-16.033	-15.797	-15.158	-14.114	-12.661	-10.794	-8.511	-5.807	-2.677	0.618	4.238	8.236	12.615	17.381	22.541	28.1
4-butylmorpholine	1005-67-0		-511.034	-486.363	-461.13	-435.352	-409.053	-382.264	-355.027	-327.395	-299.439	-271.25	-242.944	-214.665	-186.587	-158.922	-131.928	-105.934	-81.388	-58.931	-39.438	-23.895	-13.002	-6.703	-4.144	-6	-8.652	-11.037	-13.109	-14.829	-16.159	-17.066	-17.521	-17.498	-16.976	-15.937	-14.367	-12.252	-9.582	-6.348	-2.544	1.837	6.799	12.347	18.483	25.212	32.534	40.453	48.97
4-chloro-3-oxobutanoicacidethylester	638-07-3		-66.133	-65.071	-63.516	-61.482	-58.987	-56.055	-52.711	-48.992	-44.942	-40.614	-36.077	-31.416	-26.734	-22.151	-17.8	-13.824	-10.36	-7.524	-5.393	-3.994	-3.301	-3.238	-3.698	-5.438	-7.368	-9.076	-10.561	-11.818	-12.839	-13.613	-14.127	-14.369	-14.321	-13.969	-13.296	-12.287	-10.926	-9.199	-7.092	-4.591	-2.236	0.264	3.005	5.981	9.185	12.617	16.275
4-chloroanisole	623-12-1		51.663	48.362	45.542	43.162	41.168	39.496	38.066	36.787	35.555	34.257	32.786	31.042	28.955	26.486	23.636	20.447	16.99	13.358	9.649	5.961	2.381	-1.015	-4.166	-7.258	-10.005	-12.308	-14.175	-15.615	-16.636	-17.242	-17.44	-17.234	-16.627	-15.618	-14.208	-12.393	-10.17	-7.532	-4.472	-0.983	2.853	7.1	11.787	16.924	22.52	28.587	35.135
4-chloropyridine	626-61-9		-451.242	-430.004	-408.258	-386.019	-363.304	-340.128	-316.513	-292.482	-268.06	-243.282	-218.188	-192.835	-167.303	-141.72	-116.3	-91.417	-67.713	-46.213	-28.284	-15.177	-7.272	-3.776	-3.273	-5.571	-8.209	-10.533	-12.518	-14.149	-15.409	-16.287	-16.773	-16.86	-16.542	-15.816	-14.677	-13.123	-11.152	-8.759	-5.944	-2.7	0.709	4.438	8.539	13.014	17.867	23.103	28.727
4-decanol	2051-31-2		-282.953	-269.559	-255.637	-241.202	-226.27	-210.861	-194.996	-178.703	-162.013	-144.967	-127.62	-110.052	-92.384	-74.81	-57.644	-41.375	-26.714	-14.53	-5.609	-0.281	1.785	1.402	-0.509	-3.95	-7.37	-10.324	-12.789	-14.743	-16.169	-17.054	-17.384	-17.152	-16.35	-14.973	-13.018	-10.482	-7.364	-3.665	0.613	5.469	10.457	15.566	20.632	25.295	29.048	31.244	31.2
4-decanone	624-16-8		-213.146	-205.354	-197.021	-188.157	-178.776	-168.891	-158.518	-147.675	-136.385	-124.676	-112.584	-100.161	-87.482	-74.659	-61.865	-49.354	-37.492	-26.758	-17.696	-10.786	-6.276	-4.063	-3.738	-6.039	-8.772	-11.22	-13.334	-15.073	-16.399	-17.277	-17.682	-17.589	-16.978	-15.835	-14.146	-11.901	-9.091	-5.71	-1.753	2.785	7.907	13.616	19.913	26.8	34.279	42.35	51.015
4-ethyl-1,2-dimethylbenzene	934-80-5		202.604	187.831	173.619	159.963	146.856	134.292	122.263	110.763	99.785	89.322	79.367	69.913	60.955	52.487	44.503	37	29.972	23.418	17.335	11.723	6.58	1.908	-2.291	-6.014	-9.259	-12.021	-14.296	-16.078	-17.361	-18.141	-18.41	-18.163	-17.393	-16.095	-14.262	-11.888	-8.969	-5.499	-1.472	3.116	8.269	13.993	20.29	27.165	34.621	42.661	51.289
4-ethyl-2-methoxyphenol	2785-89-9		-47.621	-45.437	-42.798	-39.72	-36.223	-32.337	-28.103	-23.581	-18.854	-14.032	-9.257	-4.707	-0.586	2.89	5.528	7.186	7.814	7.458	6.254	4.39	2.076	-0.49	-3.139	-6.1	-8.845	-11.192	-13.139	-14.682	-15.817	-16.539	-16.844	-16.725	-16.177	-15.194	-13.77	-11.899	-9.575	-6.793	-3.546	0.17	3.532	6.473	8.615	9.223	7.396	2.329	-6.323
4-ethylaniline	589-16-2		-260.049	-246.957	-233.294	-219.071	-204.3	-188.997	-173.186	-156.894	-140.168	-123.072	-105.712	-88.255	-70.969	-54.272	-38.773	-25.25	-14.493	-7.002	-2.731	-1.119	-1.372	-2.747	-4.683	-7.192	-9.543	-11.533	-13.16	-14.426	-15.33	-15.871	-16.05	-15.865	-15.316	-14.405	-13.13	-11.494	-9.497	-7.141	-4.428	-1.36	1.338	3.951	6.557	9.107	11.563	13.901	16.112
4-ethylacetophenone	937-30-4		-214.883	-205.96	-196.55	-186.669	-176.338	-165.579	-154.416	-142.88	-131.006	-118.837	-106.425	-93.842	-81.185	-68.591	-56.251	-44.432	-33.484	-23.822	-15.867	-9.93	-6.11	-4.242	-3.957	-6.026	-8.502	-10.732	-12.682	-14.322	-15.62	-16.549	-17.086	-17.207	-16.894	-16.129	-14.898	-13.187	-10.986	-8.283	-5.072	-1.342	2.9	7.669	12.971	18.812	25.196	32.128	39.612
4-ethylpyridine	536-75-4		-548.79	-524.043	-498.771	-472.988	-446.708	-419.946	-392.721	-365.053	-336.967	-308.489	-279.653	-250.503	-221.097	-191.516	-161.894	-132.454	-103.602	-76.081	-51.152	-30.583	-15.991	-7.696	-4.42	-5.989	-8.403	-10.618	-12.584	-14.258	-15.601	-16.579	-17.164	-17.331	-17.06	-16.331	-15.132	-13.449	-11.272	-8.59	-5.396	-1.683	2.546	7.304	12.597	18.429	24.806	31.731	39.207
4-ethylstyrene	3454-07-07		204.498	189.216	174.525	160.422	146.902	133.96	121.593	109.793	98.558	87.88	77.754	68.173	59.132	50.623	42.641	35.178	28.227	21.783	15.839	10.389	5.426	0.947	-3.055	-6.582	-9.637	-12.225	-14.345	-15.999	-17.186	-17.906	-18.157	-17.936	-17.239	-16.064	-14.405	-12.258	-9.617	-6.477	-2.833	1.321	5.99	11.18	16.896	23.145	29.932	37.261	45.137
4-fluoroacetophenone	403-42-9		-191.938	-183.89	-175.354	-166.349	-156.895	-147.018	-136.744	-126.107	-115.147	-103.915	-92.473	-80.906	-69.329	-57.898	-46.825	-36.386	-26.92	-18.79	-12.318	-7.691	-4.9	-3.732	-3.842	-5.939	-8.345	-10.489	-12.351	-13.908	-15.143	-16.035	-16.57	-16.732	-16.507	-15.883	-14.849	-13.396	-11.513	-9.192	-6.424	-3.201	0.314	4.227	8.575	13.366	18.602	24.29	30.435
4-fluoroanisole	459-60-9		29.505	27.076	25.165	23.734	22.741	22.127	21.822	21.739	21.774	21.81	21.721	21.385	20.693	19.567	17.969	15.909	13.441	10.65	7.641	4.526	1.409	-1.619	-4.481	-7.394	-10.012	-12.212	-14.004	-15.396	-16.394	-17.004	-17.229	-17.072	-16.531	-15.604	-14.287	-12.574	-10.456	-7.925	-4.969	-1.576	2.171	6.339	10.96	16.044	21.603	27.647	34.187
4-fluorobenzaldehyde	459-57-4		-149.563	-143.665	-137.299	-130.482	-123.235	-115.581	-107.547	-99.165	-90.474	-81.522	-72.373	-63.111	-53.848	-44.732	-35.958	-27.765	-20.428	-14.221	-9.368	-5.985	-4.042	-3.371	-3.712	-5.798	-8.145	-10.233	-12.045	-13.561	-14.765	-15.642	-16.177	-16.357	-16.17	-15.606	-14.654	-13.305	-11.551	-9.383	-6.793	-3.772	-0.556	3.006	6.966	11.33	16.107	21.302	26.925
4-fluorotoluene	352-32-9		210.904	195.035	179.775	165.121	151.072	137.623	124.771	112.513	100.844	89.76	79.257	69.329	59.972	51.179	42.945	35.263	28.127	21.53	15.465	9.925	4.902	0.39	-3.62	-7.134	-10.159	-12.701	-14.768	-16.363	-17.492	-18.158	-18.364	-18.113	-17.404	-16.238	-14.613	-12.527	-9.978	-6.961	-3.471	0.497	4.897	9.764	15.114	20.952	27.285	34.119	41.457
4-heptanone	123-19-3		-217.997	-210.459	-202.379	-193.77	-184.643	-175.01	-164.887	-154.291	-143.242	-131.766	-119.895	-107.672	-95.161	-82.453	-69.686	-57.065	-44.887	-33.56	-23.581	-15.46	-9.573	-6.008	-4.531	-6.283	-8.708	-10.936	-12.913	-14.59	-15.919	-16.859	-17.374	-17.432	-17.008	-16.079	-14.627	-12.637	-10.098	-6.999	-3.333	0.908	5.729	11.134	17.126	23.709	30.886	38.657	47.026
4-fluorostyrene	405-99-2		208.723	192.9	177.684	163.074	149.067	135.66	122.852	110.639	99.019	87.987	77.54	67.674	58.384	49.666	41.514	33.922	26.884	20.394	14.443	9.024	4.128	-0.252	-4.127	-7.506	-10.398	-12.812	-14.76	-16.25	-17.29	-17.889	-18.055	-17.794	-17.109	-16.006	-14.485	-12.547	-10.191	-7.414	-4.21	-0.575	3.398	7.775	12.583	17.83	23.526	29.679	36.298
4-heptanol	589-55-9		-291.935	-278.496	-264.532	-250.058	-235.091	-219.648	-203.752	-187.428	-170.707	-153.628	-136.242	-118.619	-100.868	-83.154	-65.742	-49.051	-33.703	-20.504	-10.28	-3.539	-0.183	0.444	-0.764	-3.928	-7.202	-10.051	-12.445	-14.359	-15.773	-16.669	-17.034	-16.855	-16.123	-14.833	-12.978	-10.555	-7.564	-4.003	0.126	4.821	9.567	14.364	19.043	23.228	26.404	27.941	27.209
4-methoxy-4-methyl-pentan-2-one	107-70-0		-255.557	-245.698	-235.353	-224.53	-213.241	-201.497	-189.315	-176.713	-163.715	-150.351	-136.656	-122.682	-108.494	-94.188	-79.898	-65.819	-52.233	-39.523	-28.168	-18.681	-11.48	-6.73	-4.269	-5.619	-7.848	-9.939	-11.844	-13.518	-14.912	-15.984	-16.691	-16.998	-16.873	-16.288	-15.219	-13.646	-11.553	-8.926	-5.752	-2.021	2.272	7.136	12.577	18.6	25.21	32.409	40.201
4-methoxybenzaldehyde	123-11-5		-200.342	-192.071	-183.338	-174.16	-164.556	-154.547	-144.159	-133.42	-122.365	-111.036	-99.486	-87.788	-76.037	-64.368	-52.963	-42.064	-31.975	-23.046	-15.614	-9.931	-6.082	-3.951	-3.263	-4.975	-7.161	-9.155	-10.934	-12.476	-13.759	-14.76	-15.456	-15.827	-15.851	-15.511	-14.786	-13.66	-12.117	-10.141	-7.718	-4.834	-1.543	2.209	6.444	11.172	16.403	22.145	28.407
4-methyl-1,3-pentadiene	926-56-7		195.454	180.991	167.09	153.747	140.956	128.711	117.005	105.831	95.183	85.053	75.433	66.315	57.693	49.557	41.9	34.717	28	21.744	15.944	10.596	5.699	1.25	-2.751	-6.323	-9.445	-12.106	-14.302	-16.03	-17.282	-18.054	-18.338	-18.127	-17.414	-16.192	-14.452	-12.186	-9.389	-6.052	-2.168	2.269	7.265	12.826	18.959	25.666	32.955	40.829	49.291
4-methyl-1,3-dioxane	1120-97-4		-231.884	-224.564	-216.651	-208.151	-199.075	-189.433	-179.237	-168.502	-157.249	-145.501	-133.289	-120.655	-107.658	-94.378	-80.935	-67.503	-54.331	-41.772	-30.281	-20.381	-12.556	-7.092	-3.964	-5.089	-7.241	-9.279	-11.165	-12.855	-14.304	-15.465	-16.296	-16.755	-16.807	-16.419	-15.563	-14.215	-12.354	-9.964	-7.028	-3.536	0.524	5.159	10.377	16.185	22.587	29.589	37.193
4-methyl-1-hexene	3769-23-1		218.426	203.738	189.495	175.693	162.328	149.397	136.899	124.835	113.207	102.019	91.275	80.981	71.145	61.775	52.877	44.462	36.538	29.113	22.197	15.798	9.923	4.582	-0.219	-4.506	-8.24	-11.405	-13.996	-16.012	-17.447	-18.3	-18.567	-18.246	-17.333	-15.827	-13.725	-11.025	-7.724	-3.822	0.685	5.797	11.517	17.845	24.783	32.333	40.496	49.272	58.663
4-methyl-1-pentanol	626-89-1		-290.565	-277.688	-264.258	-250.286	-235.787	-220.778	-205.279	-189.314	-172.913	-156.113	-138.966	-121.542	-103.945	-86.335	-68.965	-52.227	-36.703	-23.162	-12.419	-5.037	-1.028	0.162	-0.619	-3.577	-6.731	-9.494	-11.833	-13.719	-15.128	-16.039	-16.436	-16.305	-15.635	-14.42	-12.652	-10.329	-7.449	-4.011	-0.018	4.528	9.025	13.453	17.586	20.952	22.918	22.756	19.829
4-methyl-2,3-pentanedione	7493-58-5		-54.713	-54.86	-54.502	-53.652	-52.327	-50.546	-48.332	-45.709	-42.709	-39.369	-35.736	-31.866	-27.831	-23.72	-19.64	-15.716	-12.092	-8.915	-6.323	-4.427	-3.286	-2.901	-3.208	-5.196	-7.522	-9.653	-11.56	-13.215	-14.583	-15.632	-16.327	-16.637	-16.534	-15.989	-14.98	-13.485	-11.486	-8.967	-5.916	-2.32	1.809	6.492	11.739	17.557	23.949	30.919	38.471
4-methyl-2-pentanol	108-11-2		-297.138	-283.981	-270.264	-256.001	-241.209	-225.905	-210.111	-193.852	-177.16	-160.072	-142.639	-124.93	-107.045	-89.138	-71.452	-54.37	-38.467	-24.519	-13.372	-5.637	-1.371	-0.025	-0.732	-3.707	-6.892	-9.678	-12.034	-13.933	-15.352	-16.272	-16.675	-16.55	-15.885	-14.674	-12.911	-10.591	-7.713	-4.277	-0.282	4.268	8.811	13.358	17.732	21.549	24.289	25.331	24.074
4-methyl-2-pentylacetate	108-84-9		-187.343	-180.781	-173.706	-166.129	-158.061	-149.516	-140.51	-131.06	-121.187	-110.921	-100.299	-89.373	-78.218	-66.945	-55.712	-44.749	-34.369	-24.966	-16.973	-10.773	-6.578	-4.347	-3.796	-5.902	-8.508	-10.866	-12.931	-14.659	-16.011	-16.951	-17.448	-17.476	-17.011	-16.035	-14.53	-12.485	-9.887	-6.728	-3.001	1.3	6.18	11.642	17.69	24.327	31.555	39.376	47.79
4-methyl-3-penten-2-one	141-79-7		-284.363	-273.119	-261.332	-249.017	-236.195	-222.887	-209.118	-194.918	-180.319	-165.36	-150.087	-134.556	-118.838	-103.031	-87.273	-71.766	-56.804	-42.806	-30.312	-19.914	-12.099	-7.046	-4.532	-5.885	-8.116	-10.223	-12.152	-13.849	-15.261	-16.344	-17.053	-17.354	-17.215	-16.609	-15.513	-13.909	-11.781	-9.116	-5.902	-2.13	2.208	7.119	12.609	18.682	25.345	32.599	40.45
4-methyl-3-heptanol	14979-39-6		-272.352	-259.693	-246.516	-232.836	-218.673	-204.044	-188.974	-173.487	-157.615	-141.396	-124.882	-108.146	-91.299	-74.52	-58.091	-42.454	-28.247	-16.265	-7.257	-1.608	0.887	0.916	-0.67	-3.986	-7.347	-10.257	-12.693	-14.632	-16.056	-16.95	-17.302	-17.102	-16.342	-15.016	-13.12	-10.651	-7.608	-3.99	0.201	4.963	9.814	14.749	19.593	23.976	27.377	29.155	28.658
4-methyl-5-vinylthiazole	1759-28-0		-385.725	-367.257	-348.279	-328.803	-308.844	-288.419	-267.549	-246.256	-224.57	-202.526	-180.175	-157.585	-134.864	-112.185	-89.838	-68.305	-48.35	-31.028	-17.465	-8.345	-3.466	-1.871	-2.384	-4.935	-7.659	-10.045	-12.075	-13.734	-15.01	-15.89	-16.365	-16.427	-16.068	-15.282	-14.065	-12.412	-10.319	-7.783	-4.801	-1.369	2.231	6.133	10.374	14.937	19.807	24.967	30.403
4-methyl-4-heptanol	598-01-6		-308.891	-294.656	-279.894	-264.618	-248.844	-232.592	-215.884	-198.744	-181.203	-163.298	-145.076	-126.603	-107.976	-89.349	-70.973	-53.259	-36.843	-22.59	-11.437	-4.012	-0.266	0.507	-0.7	-3.915	-7.236	-10.124	-12.55	-14.488	-15.918	-16.822	-17.188	-17.004	-16.26	-14.951	-13.073	-10.621	-7.594	-3.993	0.183	4.93	9.802	14.802	19.781	24.414	28.244	30.693	31.141
4-methylacetophenone	122-00-9		-216.297	-207.401	-198.017	-188.161	-177.855	-167.12	-155.981	-144.468	-132.616	-120.468	-108.074	-95.506	-82.857	-70.259	-57.894	-46.02	-34.969	-25.146	-16.962	-10.743	-6.611	-4.439	-3.888	-5.808	-8.187	-10.346	-12.254	-13.88	-15.193	-16.164	-16.769	-16.983	-16.785	-16.156	-15.08	-13.54	-11.523	-9.018	-6.014	-2.501	1.52	6.063	11.137	16.748	22.902	29.604	36.86
4-methyl-nonane	17301-94-9		269.776	250.839	232.547	214.899	197.896	181.538	165.823	150.752	136.325	122.542	109.402	96.906	85.053	73.842	63.275	53.351	44.069	35.43	27.434	20.08	13.368	7.299	1.872	-2.913	-7.055	-10.555	-13.414	-15.63	-17.204	-18.135	-18.425	-18.072	-17.078	-15.441	-13.161	-10.24	-6.675	-2.469	2.38	7.872	14.007	20.785	28.205	36.269	44.976	54.326	64.319
4-methyl-pentylamine	5344-20-7		-803.354	-767.241	-730.505	-693.154	-655.199	-616.654	-577.535	-537.864	-497.666	-456.976	-415.834	-374.296	-332.429	-290.322	-248.097	-205.928	-164.104	-123.181	-84.352	-50.066	-24.106	-9.099	-3.437	-5.062	-7.801	-10.303	-12.494	-14.314	-15.717	-16.665	-17.132	-17.096	-16.542	-15.46	-13.842	-11.685	-8.985	-5.744	-1.962	2.358	7.032	12.138	17.693	23.68	30.08	36.875	44.046
4-methylanisole	104-93-8		-7.364	-7.933	-7.965	-7.485	-6.527	-5.137	-3.374	-1.312	0.951	3.299	5.592	7.674	9.385	10.577	11.135	10.997	10.167	8.706	6.725	4.361	1.756	-0.954	-3.653	-6.597	-9.318	-11.649	-13.589	-15.136	-16.286	-17.034	-17.372	-17.293	-16.788	-15.847	-14.46	-12.616	-10.304	-7.514	-4.234	-0.456	3.825	8.623	13.946	19.804	26.204	33.153	40.658
4-methylbenzaldehyde	104-87-0		-176.055	-169.266	-162.004	-154.285	-146.127	-137.549	-128.574	-119.228	-109.54	-99.551	-89.31	-78.883	-68.363	-57.877	-47.598	-37.76	-28.654	-20.614	-13.967	-8.958	-5.672	-4.006	-3.699	-5.633	-7.986	-10.121	-12.01	-13.622	-14.931	-15.909	-16.531	-16.775	-16.619	-16.046	-15.038	-13.58	-11.66	-9.265	-6.385	-3.009	0.857	5.229	10.119	15.533	21.477	27.957	34.979
4-methylcyclohexanol	589-91-3		-304.238	-290.437	-276.091	-261.213	-245.817	-229.923	-213.551	-196.73	-179.491	-161.876	-143.941	-125.761	-107.447	-89.163	-71.171	-53.873	-37.864	-23.931	-12.905	-5.35	-1.259	-0.039	-0.816	-3.796	-6.969	-9.74	-12.079	-13.959	-15.357	-16.254	-16.634	-16.484	-15.794	-14.556	-12.766	-10.418	-7.512	-4.047	-0.024	4.555	9.146	13.748	18.182	22.059	24.851	25.93	24.692
4-methylene-2-oxetanone	674-82-8		19.042	15.244	11.936	9.099	6.712	4.75	3.184	1.982	1.106	0.514	0.161	-0.006	-0.041	0	0.061	0.087	0.03	-0.149	-0.478	-0.974	-1.637	-2.457	-3.413	-5.111	-6.867	-8.408	-9.743	-10.879	-11.816	-12.551	-13.075	-13.376	-13.438	-13.242	-12.767	-11.992	-10.893	-9.447	-7.632	-5.426	-3.281	-0.907	1.799	4.851	8.258	12.034	16.19
4-methylcyclohexanone	589-92-4		-255.652	-246.321	-236.457	-226.07	-215.175	-203.785	-191.919	-179.598	-166.847	-153.695	-140.181	-126.35	-112.267	-98.017	-83.724	-69.564	-55.795	-42.779	-30.987	-20.954	-13.161	-7.865	-4.978	-6.103	-8.202	-10.215	-12.081	-13.739	-15.128	-16.195	-16.89	-17.17	-17.001	-16.352	-15.197	-13.518	-11.297	-8.521	-5.179	-1.262	3.235	8.32	13.996	20.268	27.137	34.607	42.68
4-methylbenzoylchloride	874-60-2		143.396	133.514	124.012	114.871	106.073	97.598	89.432	81.559	73.967	66.646	59.59	52.796	46.262	39.992	33.989	28.262	22.818	17.67	12.827	8.302	4.107	0.253	-3.247	-6.473	-9.325	-11.76	-13.777	-15.373	-16.544	-17.289	-17.602	-17.479	-16.917	-15.911	-14.455	-12.544	-10.173	-7.337	-4.03	-0.246	3.97	8.655	13.824	19.481	25.632	32.283	39.439
4-methylcyclohexene	591-47-9		171.252	160.402	149.925	139.796	129.988	120.474	111.234	102.245	93.494	84.969	76.666	68.586	60.736	53.128	45.78	38.711	31.946	25.509	19.425	13.72	8.419	3.544	-0.882	-4.947	-8.528	-11.57	-14.067	-16.012	-17.399	-18.222	-18.476	-18.156	-17.256	-15.773	-13.701	-11.038	-7.779	-3.92	0.54	5.606	11.279	17.562	24.457	31.966	40.091	48.834	58.196
4-methylcyclopentene	1759-81-5		178.954	168.021	157.375	146.993	136.852	126.936	117.233	107.735	98.444	89.363	80.504	71.883	63.517	55.431	47.648	40.192	33.088	26.361	20.034	14.129	8.666	3.663	-0.862	-4.969	-8.57	-11.627	-14.136	-16.09	-17.485	-18.316	-18.578	-18.268	-17.38	-15.911	-13.858	-11.217	-7.984	-4.158	0.264	5.286	10.909	17.134	23.965	31.402	39.447	48.101	57.365
4-methylheptane	589-53-7		270.679	251.68	233.328	215.623	198.564	182.153	166.388	151.269	136.796	122.969	109.787	97.251	85.361	74.115	63.515	53.559	44.248	35.582	27.56	20.182	13.449	7.36	1.915	-2.886	-7.043	-10.557	-13.426	-15.652	-17.235	-18.173	-18.468	-18.119	-17.127	-15.491	-13.211	-10.288	-6.721	-2.51	2.344	7.843	13.985	20.772	28.203	36.277	44.997	54.36	64.368
4-methyloctane	221-34-4		270.045	251.088	232.777	215.112	198.091	181.716	165.986	150.901	136.46	122.663	109.511	97.003	85.138	73.917	63.34	53.407	44.117	35.47	27.466	20.105	13.387	7.312	1.88	-2.91	-7.057	-10.561	-13.423	-15.642	-17.219	-18.153	-18.445	-18.094	-17.101	-15.465	-13.186	-10.265	-6.701	-2.495	2.355	7.847	13.983	20.761	28.183	36.248	44.957	54.309	64.304
4-methylpentanitrile	542-54-1		-159.956	-154.787	-149.063	-142.796	-135.999	-128.688	-120.882	-112.606	-103.892	-94.78	-85.323	-75.595	-65.695	-55.756	-45.96	-36.544	-27.798	-20.05	-13.617	-8.74	-5.509	-3.842	-3.502	-5.327	-7.592	-9.688	-11.576	-13.219	-14.577	-15.614	-16.295	-16.59	-16.473	-15.921	-14.914	-13.436	-11.474	-9.015	-6.052	-2.577	1.296	5.637	10.471	15.799	21.619	27.932	34.737
4-methylpiperidine	626-58-4		-773.904	-738.904	-703.323	-667.172	-630.465	-593.218	-555.452	-517.19	-478.463	-439.306	-399.765	-359.894	-319.762	-279.455	-239.089	-198.828	-158.943	-119.956	-82.966	-50.191	-25.04	-10.044	-4.046	-5.557	-8.262	-10.732	-12.894	-14.689	-16.067	-16.989	-17.424	-17.348	-16.743	-15.594	-13.893	-11.631	-8.805	-5.411	-1.448	3.084	8.051	13.506	19.459	25.892	32.785	40.115	47.86
4-methylstyrene	622-97-9		201.14	185.939	171.337	157.328	143.909	131.075	118.823	107.147	96.041	85.499	75.517	66.086	57.2	48.851	41.033	33.737	26.955	20.678	14.9	9.612	4.805	0.473	-3.39	-6.792	-9.738	-12.231	-14.276	-15.874	-17.026	-17.733	-17.992	-17.801	-17.158	-16.056	-14.491	-12.457	-9.947	-6.955	-3.472	0.509	4.993	9.988	15.504	21.546	28.122	35.237	42.899
4-methylthiazole	693-95-8		-389.763	-371.735	-353.191	-334.142	-314.602	-294.586	-274.112	-253.203	-231.884	-210.189	-188.165	-165.874	-143.408	-120.915	-98.632	-76.95	-56.497	-38.185	-23.108	-12.157	-5.522	-2.552	-2.151	-4.418	-7.039	-9.363	-11.365	-13.026	-14.327	-15.253	-15.792	-15.933	-15.667	-14.987	-13.887	-12.363	-10.412	-8.029	-5.213	-1.961	1.323	4.847	8.676	12.799	17.207	21.893	26.853
4-morpholinepropanamine	123-00-2		-946.19	-892.551	-838.706	-784.803	-731.031	-677.62	-624.828	-572.912	-522.091	-472.503	-424.182	-377.07	-331.057	-286.039	-241.981	-198.976	-157.33	-117.698	-81.296	-50.088	-26.393	-11.421	-4.059	-4.594	-6.736	-8.812	-10.754	-12.498	-13.984	-15.16	-15.98	-16.405	-16.403	-15.946	-15.013	-13.584	-11.646	-9.187	-6.198	-2.67	1.28	5.716	10.658	16.101	22.039	28.464	35.366
4-octyne	1942-45-6		137.177	128.692	120.411	112.337	104.469	96.809	89.353	82.098	75.042	68.179	61.505	55.017	48.715	42.598	36.672	30.946	25.432	20.144	15.102	10.327	5.844	1.675	-2.153	-5.811	-9.086	-11.882	-14.193	-16.009	-17.321	-18.121	-18.4	-18.149	-17.361	-16.028	-14.141	-11.696	-8.685	-5.102	-0.942	3.799	9.127	15.046	21.558	28.668	36.379	44.693	53.613
4-pentenal	2100-17-6		-146.435	-141.828	-136.68	-131.005	-124.818	-118.138	-110.989	-103.397	-95.396	-87.03	-78.355	-69.444	-60.394	-51.336	-42.438	-33.914	-26.019	-19.032	-13.213	-8.757	-5.737	-4.089	-3.625	-5.304	-7.425	-9.379	-11.143	-12.693	-14	-15.036	-15.77	-16.174	-16.22	-15.88	-15.132	-13.953	-12.322	-10.222	-7.636	-4.548	-0.95	3.174	7.833	13.038	18.796	25.115	32.002
4-pentenoicacid	591-80-0		-84.049	-81.893	-79.257	-76.153	-72.594	-68.599	-64.19	-59.396	-54.256	-48.821	-43.158	-37.352	-31.515	-25.785	-20.326	-15.323	-10.961	-7.405	-4.77	-3.095	-2.338	-2.383	-3.066	-5.131	-7.368	-9.328	-10.997	-12.359	-13.401	-14.104	-14.452	-14.43	-14.021	-13.211	-11.987	-10.335	-8.248	-5.715	-2.731	0.709	3.499	5.275	5.125	1.5	-7.171	-21.541	-40.846
4-phenyl-2-butanone	2550-26-7		-197.654	-189.726	-181.29	-172.358	-162.945	-153.069	-142.753	-132.023	-120.913	-109.467	-97.746	-85.831	-73.84	-61.933	-50.336	-39.344	-29.322	-20.666	-13.728	-8.714	-5.618	-4.216	-4.149	-6.077	-8.338	-10.378	-12.176	-13.709	-14.951	-15.879	-16.468	-16.695	-16.537	-15.973	-14.983	-13.548	-11.652	-9.28	-6.416	-3.049	0.832	5.239	10.181	15.666	21.702	28.297	35.456
4-pyridinecarboxaldehyde	872-85-5		-411.594	-391.659	-371.218	-350.288	-328.889	-307.044	-284.781	-262.133	-239.145	-215.874	-192.395	-168.816	-145.289	-122.034	-99.372	-77.763	-57.821	-40.288	-25.881	-15.054	-7.789	-3.611	-1.799	-3.211	-5.311	-7.281	-9.098	-10.735	-12.164	-13.356	-14.284	-14.918	-15.235	-15.208	-14.817	-14.041	-12.861	-11.263	-9.23	-6.75	-3.968	-0.775	2.872	6.979	11.557	16.613	22.154
4-vinylcyclohexene	100-40-3		180.443	167.98	155.941	144.315	133.097	122.278	111.852	101.815	92.162	82.89	73.998	65.485	57.352	49.601	42.233	35.253	28.666	22.477	16.694	11.322	6.371	1.848	-2.238	-5.962	-9.236	-12.019	-14.306	-16.092	-17.371	-18.139	-18.388	-18.113	-17.308	-15.966	-14.082	-11.65	-8.664	-5.119	-1.009	3.67	8.923	14.754	21.167	28.167	35.755	43.937	52.714
4-vinylpyridine	100-43-6		-514.755	-490.942	-466.615	-441.785	-416.467	-390.679	-364.439	-337.768	-310.692	-283.238	-255.445	-227.361	-199.052	-170.621	-142.235	-114.192	-87.023	-61.664	-39.549	-22.353	-11.1	-5.36	-3.586	-5.459	-7.888	-10.072	-11.982	-13.595	-14.888	-15.841	-16.437	-16.662	-16.501	-15.942	-14.974	-13.587	-11.769	-9.511	-6.803	-3.636	-0.057	3.978	8.487	13.48	18.963	24.945	31.433
5-ethylidene-2-norbornene	16219-75-3		161.676	151.283	141.216	131.458	121.993	112.806	103.885	95.218	86.799	78.624	70.691	63.005	55.569	48.395	41.494	34.88	28.57	22.581	16.93	11.638	6.723	2.203	-1.904	-5.708	-9.07	-11.93	-14.282	-16.122	-17.442	-18.237	-18.501	-18.228	-17.414	-16.051	-14.136	-11.663	-8.628	-5.025	-0.852	3.896	9.222	15.131	21.623	28.704	36.374	44.637	53.495
5-decyne	1942-46-7		161.923	150.81	140.153	129.933	120.129	110.719	101.683	92.999	84.646	76.606	68.862	61.401	54.213	47.293	40.641	34.26	28.159	22.351	16.851	11.677	6.85	2.391	-1.679	-5.496	-8.887	-11.776	-14.156	-16.017	-17.353	-18.156	-18.42	-18.136	-17.299	-15.902	-13.939	-11.406	-8.297	-4.608	-0.334	4.529	9.983	16.033	22.681	29.929	37.781	46.237	55.301
5-ethyldihydro-2(3h)-furanone	695-06-7		-202.729	-195.935	-188.622	-180.801	-172.489	-163.701	-154.456	-144.775	-134.683	-124.209	-113.389	-102.268	-90.906	-79.382	-67.809	-56.341	-45.194	-34.656	-25.082	-16.865	-10.357	-5.774	-3.113	-4.062	-5.978	-7.89	-9.75	-11.501	-13.084	-14.441	-15.519	-16.266	-16.64	-16.602	-16.122	-15.171	-13.728	-11.773	-9.292	-6.272	-2.716	1.395	6.069	11.311	17.128	23.523	30.5
5-hexenoicacid	1577-22-6		-92.968	-90.178	-86.92	-83.206	-79.05	-74.47	-69.487	-64.129	-58.433	-52.447	-46.239	-39.893	-33.525	-27.277	-21.328	-15.878	-11.135	-7.286	-4.464	-2.712	-1.979	-2.125	-2.962	-5.192	-7.583	-9.681	-11.469	-12.926	-14.035	-14.775	-15.128	-15.077	-14.606	-13.7	-12.347	-10.536	-8.257	-5.503	-2.271	1.443	4.663	7.051	7.755	5.28	-2.018	-15.024	-33.195
5-methyl-2(3h)-furanone	591-12-8		-110.169	-107.691	-104.688	-101.174	-97.161	-92.668	-87.714	-82.323	-76.526	-70.357	-63.864	-57.106	-50.157	-43.117	-36.11	-29.29	-22.844	-16.98	-11.911	-7.822	-4.837	-2.991	-2.217	-3.682	-5.697	-7.621	-9.429	-11.088	-12.562	-13.812	-14.8	-15.488	-15.84	-15.824	-15.411	-14.575	-13.293	-11.546	-9.316	-6.59	-3.495	0.065	4.124	8.689	13.764	19.355	25.465
5-methyl-1-hexyne	2203-80-7		185.222	171.475	158.277	145.619	133.494	121.893	110.809	100.231	90.152	80.56	71.449	62.807	54.628	46.902	39.622	32.782	26.377	20.403	14.856	9.735	5.04	0.771	-3.068	-6.537	-9.576	-12.155	-14.272	-15.922	-17.104	-17.813	-18.045	-17.798	-17.068	-15.853	-14.151	-11.962	-9.284	-6.119	-2.467	1.669	5.834	10.178	14.72	19.394	24.128	28.853	33.504
5-methyl-2-hexanone	110-12-3		-236.646	-228.044	-218.887	-209.188	-198.962	-188.226	-177	-165.305	-153.171	-140.628	-127.719	-114.497	-101.031	-87.422	-73.815	-60.418	-47.532	-35.564	-25.014	-16.394	-10.085	-6.182	-4.448	-6.069	-8.414	-10.587	-12.536	-14.21	-15.559	-16.541	-17.117	-17.256	-16.929	-16.115	-14.795	-12.952	-10.575	-7.654	-4.181	-0.148	4.448	9.613	15.35	21.661	28.551	36.02	44.071
5-methyl-2-hexyne	53566-37-3		155.99	144.812	134.115	123.881	114.093	104.732	95.779	87.215	79.021	71.18	63.675	56.49	49.615	43.039	36.756	30.764	25.064	19.66	14.56	9.773	5.314	1.197	-2.563	-6.114	-9.28	-11.982	-14.214	-15.969	-17.241	-18.021	-18.302	-18.075	-17.334	-16.071	-14.279	-11.949	-9.077	-5.656	-1.68	2.857	7.959	13.632	19.878	26.704	34.111	42.104	50.685
5-methyl-nonane	15869-85-9		269.804	250.864	232.569	214.919	197.914	181.553	165.836	150.764	136.335	122.55	109.409	96.911	85.057	73.845	63.277	53.352	44.07	35.43	27.434	20.079	13.367	7.298	1.871	-2.914	-7.056	-10.556	-13.414	-15.63	-17.204	-18.135	-18.424	-18.072	-17.076	-15.439	-13.16	-10.238	-6.673	-2.467	2.382	7.874	14.009	20.786	28.206	36.269	44.975	54.324	64.316
5-methylhexanoicacid	628-46-6		-102.011	-98.779	-95.078	-90.918	-86.309	-81.266	-75.804	-69.946	-63.723	-57.177	-50.364	-43.366	-36.292	-29.291	-22.557	-16.324	-10.854	-6.4	-3.157	-1.207	-0.5	-0.862	-2.039	-4.683	-7.46	-9.89	-11.945	-13.598	-14.826	-15.607	-15.924	-15.76	-15.103	-13.943	-12.273	-10.087	-7.382	-4.159	-0.418	3.837	7.709	10.858	12.442	10.97	4.725	-7.321	-24.734
5-nonanone	502-56-7		-221.251	-213.2	-204.62	-195.52	-185.909	-175.802	-165.211	-154.153	-142.649	-130.724	-118.411	-105.76	-92.838	-79.749	-66.651	-53.78	-41.48	-30.211	-20.516	-12.911	-7.71	-4.887	-4.084	-6.174	-8.793	-11.159	-13.221	-14.934	-16.256	-17.151	-17.588	-17.54	-16.986	-15.909	-14.292	-12.125	-9.398	-6.103	-2.234	2.214	7.245	12.862	19.067	25.864	33.253	41.236	49.814
5-undecyne	2294-72-6		-2.645	7.674	18.15	28.533	38.45	47.396	54.765	59.969	62.63	62.734	60.625	56.846	51.953	46.404	40.534	34.571	28.667	22.922	17.409	12.18	7.277	2.734	-1.419	-5.306	-8.754	-11.69	-14.106	-15.994	-17.348	-18.159	-18.422	-18.129	-17.275	-15.855	-13.862	-11.293	-8.143	-4.407	-0.082	4.836	10.348	16.459	23.171	30.485	38.405	46.932	56.067
6-heptenoicacid	1119-60-4		-89.2	-86.515	-83.355	-79.731	-75.658	-71.154	-66.241	-60.952	-55.323	-49.41	-43.282	-37.033	-30.785	-24.691	-18.936	-13.727	-9.272	-5.752	-3.28	-1.879	-1.474	-1.91	-2.985	-5.346	-7.827	-9.998	-11.84	-13.334	-14.461	-15.202	-15.54	-15.457	-14.939	-13.972	-12.544	-10.645	-8.267	-5.406	-2.056	1.784	5.191	7.827	8.849	6.766	-0.108	-12.736	-30.636
6-methyl-5-hepten-2-one	110-93-0		-220.633	-212.427	-203.683	-194.411	-184.628	-174.348	-163.591	-152.379	-140.741	-128.71	-116.33	-103.662	-90.788	-77.826	-64.948	-52.396	-40.504	-29.698	-20.451	-13.188	-8.145	-5.277	-4.269	-6.08	-8.454	-10.63	-12.564	-14.216	-15.546	-16.517	-17.096	-17.253	-16.965	-16.208	-14.963	-13.216	-10.951	-8.158	-4.827	-0.949	3.482	8.474	14.03	20.156	26.856	34.134	41.993
6-methylheptan-3-ol	18720-66-6		-287.121	-273.987	-260.309	-246.101	-231.38	-216.165	-200.48	-184.351	-167.811	-150.901	-133.673	-116.203	-98.599	-81.035	-63.782	-47.273	-32.142	-19.205	-9.282	-2.849	0.23	0.641	-0.721	-3.95	-7.263	-10.139	-12.552	-14.478	-15.898	-16.794	-17.154	-16.966	-16.223	-14.917	-13.043	-10.6	-7.585	-3.997	0.162	4.889	9.705	14.607	19.427	23.804	27.228	29.066	28.664
7-oxabicyclo[4,1,0]heptane	286-20-4		-230.043	-221.136	-211.76	-201.932	-191.668	-180.987	-169.909	-158.455	-146.65	-134.521	-122.104	-109.442	-96.598	-83.658	-70.753	-58.07	-45.883	-34.559	-24.553	-16.332	-10.254	-6.432	-4.675	-6.296	-8.658	-10.842	-12.797	-14.471	-15.814	-16.783	-17.337	-17.442	-17.068	-16.191	-14.789	-12.845	-10.345	-7.278	-3.633	0.597	5.418	10.835	16.852	23.473	30.701	38.538	46.985
8-chloroquinoline	611-33-6		-341.846	-325.853	-309.305	-292.208	-274.569	-256.398	-237.708	-218.514	-198.84	-178.718	-158.199	-137.363	-116.344	-95.369	-74.821	-55.319	-37.773	-23.273	-12.719	-6.323	-3.472	-3.111	-4.221	-6.751	-9.305	-11.499	-13.328	-14.787	-15.871	-16.578	-16.903	-16.846	-16.403	-15.571	-14.347	-12.727	-10.707	-8.281	-5.444	-2.189	1.38	5.337	9.711	14.51	19.742	25.416	31.541
8-methylquinoline	611-32-5		-356.655	-339.785	-322.356	-304.38	-285.869	-266.839	-247.31	-227.305	-206.855	-185.997	-164.786	-143.301	-121.666	-100.085	-78.9	-58.678	-40.281	-24.817	-13.313	-6.168	-2.883	-2.381	-3.548	-6.301	-9.084	-11.476	-13.468	-15.057	-16.235	-16.998	-17.341	-17.261	-16.751	-15.808	-14.427	-12.602	-10.329	-7.601	-4.414	-0.76	3.345	7.92	12.976	18.52	24.557	31.095	38.14
9,12,15-octadecatrienoicacid	463-40-1		-71.058	-67.948	-64.384	-60.378	-55.95	-51.123	-45.93	-40.413	-34.632	-28.67	-22.636	-16.679	-10.986	-5.782	-1.313	2.185	4.539	5.673	5.637	4.59	2.764	0.415	-2.219	-5.42	-8.456	-11.069	-13.243	-14.962	-16.213	-16.982	-17.258	-17.032	-16.295	-15.041	-13.264	-10.961	-8.128	-4.764	-0.872	3.548	7.827	11.637	14.197	14.046	9.295	-1.478	-18.15
9decenol1	13019-22-2		-278.246	-265.226	-251.654	-237.544	-222.91	-207.768	-192.139	-176.05	-159.532	-142.63	-125.407	-107.955	-90.419	-73.025	-56.129	-40.266	-26.167	-14.653	-6.38	-1.512	0.373	0.065	-1.607	-4.702	-7.802	-10.491	-12.745	-14.543	-15.868	-16.703	-17.035	-16.852	-16.144	-14.904	-13.124	-10.801	-7.931	-4.511	-0.542	3.977	8.566	13.192	17.646	21.491	24.105	24.718	22.58
a-bromobutyricacid	80-58-0		5.78	3.832	2.352	1.32	0.71	0.491	0.622	1.055	1.73	2.575	3.507	4.432	5.253	5.869	6.192	6.152	5.709	4.857	3.624	2.068	0.269	-1.683	-3.695	-6.171	-8.511	-10.486	-12.091	-13.326	-14.187	-14.672	-14.779	-14.506	-13.852	-12.817	-11.401	-9.606	-7.437	-4.9	-2.002	1.245	2.538	0.941	-5.241	-17.825	-37.064	-61.44	-88.917
aceticacid-2-ethylhexylester	103-09-3		-172.927	-167.292	-161.118	-154.415	-147.192	-139.461	-131.234	-122.528	-113.361	-103.762	-93.765	-83.424	-72.816	-62.055	-51.31	-40.824	-30.928	-22.035	-14.589	-8.967	-5.351	-3.657	-3.561	-5.894	-8.632	-11.087	-13.211	-14.965	-16.31	-17.213	-17.648	-17.59	-17.02	-15.921	-14.28	-12.086	-9.331	-6.007	-2.108	2.37	7.43	13.075	19.307	26.129	33.542	41.547	50.145
aceticacid-2-propenylester	591-87-7		-150.08	-145.613	-140.626	-135.126	-129.125	-122.636	-115.671	-108.251	-100.397	-92.141	-83.524	-74.604	-65.46	-56.202	-46.982	-38.003	-29.52	-21.835	-15.258	-10.055	-6.377	-4.219	-3.416	-5.096	-7.315	-9.368	-11.227	-12.862	-14.239	-15.324	-16.085	-16.489	-16.51	-16.119	-15.292	-14.008	-12.248	-9.994	-7.232	-3.947	-0.135	4.219	9.125	14.591	20.625	27.231	34.417
aceticacidcyclohexylester	622-45-7		-178.803	-173.028	-166.735	-159.934	-152.633	-144.843	-136.578	-127.852	-118.685	-109.102	-99.136	-88.835	-78.267	-67.531	-56.772	-46.194	-36.081	-26.793	-18.738	-12.301	-7.737	-5.075	-4.108	-5.991	-8.461	-10.717	-12.713	-14.401	-15.741	-16.693	-17.223	-17.3	-16.9	-15.999	-14.58	-12.628	-10.13	-7.075	-3.455	0.737	5.506	10.856	16.791	23.316	30.431	38.139	46.441
aceticaciddecylester	112-17-4		-166.15	-160.516	-154.348	-147.654	-140.444	-132.73	-124.526	-115.849	-106.722	-97.173	-87.246	-77	-66.525	-55.953	-45.478	-35.372	-25.994	-17.772	-11.133	-6.39	-3.629	-2.673	-3.149	-5.72	-8.579	-11.114	-13.286	-15.058	-16.396	-17.274	-17.667	-17.555	-16.921	-15.751	-14.035	-11.762	-8.926	-5.521	-1.541	3.016	8.153	13.873	20.177	27.067	34.544	42.608	51.26
aceticacidheptylester	112-06-1		-173.348	-167.777	-161.664	-155.017	-147.846	-140.164	-131.983	-123.32	-114.195	-104.636	-94.68	-84.379	-73.81	-63.085	-52.37	-41.9	-31.994	-23.052	-15.505	-9.728	-5.915	-4.006	-3.706	-5.915	-8.57	-10.957	-13.034	-14.757	-16.091	-17.001	-17.458	-17.438	-16.92	-15.887	-14.323	-12.218	-9.562	-6.346	-2.565	1.787	6.713	12.216	18.3	24.967	32.219	40.057	48.482
aceticacidphenylmethylester	140-11-4		-144.444	-139.375	-133.795	-127.718	-121.156	-114.125	-106.648	-98.748	-90.46	-81.83	-72.918	-63.811	-54.624	-45.515	-36.693	-28.413	-20.97	-14.656	-9.71	-6.251	-4.247	-3.525	-3.819	-5.853	-8.157	-10.218	-12.018	-13.54	-14.765	-15.672	-16.243	-16.456	-16.292	-15.732	-14.758	-13.352	-11.498	-9.18	-6.385	-3.099	0.683	4.977	9.794	15.143	21.032	27.47	34.463
aceticacidoctylester	112-14-1		-174.265	-168.366	-161.936	-154.985	-147.523	-139.564	-131.12	-122.209	-112.854	-103.082	-92.933	-82.463	-71.755	-60.929	-50.162	-39.704	-29.895	-21.144	-13.887	-8.474	-5.052	-3.511	-3.515	-5.863	-8.592	-11.032	-13.141	-14.878	-16.209	-17.103	-17.531	-17.473	-16.908	-15.821	-14.199	-12.03	-9.306	-6.02	-2.166	2.26	7.26	12.839	18.999	25.741	33.068	40.979	49.477
aceticacidnonylester	143-13-5		-162.298	-157.107	-151.358	-145.059	-138.223	-130.86	-122.985	-114.618	-105.781	-96.505	-86.832	-76.824	-66.57	-56.201	-45.903	-35.942	-26.664	-18.484	-11.819	-6.984	-4.085	-2.971	-3.296	-5.779	-8.581	-11.073	-13.215	-14.97	-16.303	-17.186	-17.594	-17.505	-16.902	-15.77	-14.096	-11.87	-9.085	-5.734	-1.812	2.686	7.762	13.417	19.656	26.48	33.889	41.885	50.468
acetin	26446-35-5		-243.18	-233.071	-222.48	-211.424	-199.925	-188.005	-175.691	-163.014	-150.011	-136.727	-123.215	-109.543	-95.797	-82.094	-68.585	-55.478	-43.04	-31.608	-21.559	-13.253	-6.945	-2.702	-0.37	-1.565	-3.62	-5.575	-7.405	-9.081	-10.567	-11.825	-12.818	-13.51	-13.865	-13.853	-13.445	-12.614	-11.34	-9.602	-7.385	-4.674	-2.008	0.688	3.285	5.436	6.63	6.193	3.374
acetonylacetone	110-13-4		-215.726	-207.96	-199.685	-190.919	-181.68	-171.988	-161.869	-151.348	-140.457	-129.232	-117.714	-105.954	-94.016	-81.979	-69.952	-58.079	-46.558	-35.65	-25.684	-17.032	-10.049	-4.982	-1.883	-2.705	-4.622	-6.577	-8.527	-10.415	-12.18	-13.76	-15.092	-16.122	-16.798	-17.078	-16.922	-16.3	-15.185	-13.554	-11.391	-8.679	-5.411	-1.574	2.842	7.843	13.435	19.624	26.412
acetylbromide	506-96-7		181.305	166.793	152.885	139.579	126.873	114.765	103.251	92.328	81.993	72.242	63.069	54.471	46.441	38.971	32.055	25.684	19.847	14.533	9.73	5.423	1.597	-1.767	-4.688	-7.185	-9.281	-10.996	-12.353	-13.371	-14.073	-14.473	-14.587	-14.426	-13.993	-13.291	-12.315	-11.055	-9.499	-7.63	-5.428	-2.871	-0.367	2.359	5.414	8.817	12.589	16.748	21.314
adipinsaeurediethylester	141-28-6	3	-159.471	-155.149	-150.297	-144.922	-139.034	-132.641	-125.755	-118.39	-110.562	-102.295	-93.617	-84.569	-75.212	-65.627	-55.934	-46.302	-36.958	-28.199	-20.371	-13.827	-8.85	-5.571	-3.917	-5.393	-7.607	-9.679	-11.567	-13.228	-14.618	-15.695	-16.419	-16.754	-16.668	-16.133	-15.124	-13.619	-11.6	-9.053	-5.964	-2.322	1.883	6.657	12.009	17.943	24.465	31.578	39.287
alkohol_c11_undecylen	112-43-6		-275.905	-262.925	-249.392	-235.318	-220.717	-205.608	-190.011	-173.953	-157.466	-140.596	-123.406	-105.99	-88.495	-71.151	-54.325	-38.566	-24.62	-13.32	-5.312	-0.728	0.894	0.367	-1.472	-4.658	-7.819	-10.555	-12.844	-14.665	-16	-16.835	-17.156	-16.954	-16.218	-14.941	-13.118	-10.745	-7.819	-4.338	-0.303	4.287	8.965	13.699	18.282	22.284	25.088	25.921	24.016
allylchloroformate	2937-50-0		128.558	119.06	109.997	101.348	93.093	85.212	77.684	70.491	63.612	57.033	50.738	44.716	38.958	33.458	28.215	23.228	18.501	14.038	9.847	5.936	2.314	-1.011	-4.03	-6.884	-9.419	-11.57	-13.342	-14.739	-15.761	-16.41	-16.685	-16.584	-16.105	-15.242	-13.99	-12.342	-10.29	-7.826	-4.939	-1.62	1.982	5.969	10.381	15.228	20.518	26.259	32.462
allyl-propyl-disulfide	2179-59-1		189.268	175.471	162.177	149.383	137.088	125.289	113.984	103.17	92.843	83.001	73.641	64.758	56.349	48.411	40.938	33.928	27.377	21.28	15.634	10.436	5.684	1.375	-2.493	-5.952	-8.973	-11.543	-13.663	-15.334	-16.552	-17.316	-17.624	-17.471	-16.853	-15.766	-14.205	-12.164	-9.638	-6.621	-3.108	0.909	5.417	10.433	15.963	22.012	28.585	35.687	43.32
allylacrylate	999-55-3		-104.545	-102.317	-99.541	-96.224	-92.375	-88.006	-83.13	-77.769	-71.948	-65.707	-59.096	-52.188	-45.082	-37.912	-30.853	-24.125	-17.982	-12.686	-8.469	-5.479	-3.741	-3.153	-3.515	-5.647	-8.06	-10.216	-12.094	-13.676	-14.938	-15.862	-16.426	-16.612	-16.401	-15.776	-14.722	-13.224	-11.268	-8.841	-5.932	-2.53	1.339	5.705	10.586	15.987	21.916	28.38	35.385
allylbenzene	300-57-2		196.138	181.283	167.015	153.329	140.221	127.688	115.725	104.326	93.486	83.199	73.459	64.258	55.59	47.447	39.821	32.704	26.087	19.962	14.321	9.156	4.458	0.221	-3.561	-6.903	-9.803	-12.26	-14.277	-15.856	-16.996	-17.697	-17.954	-17.765	-17.124	-16.025	-14.461	-12.425	-9.909	-6.904	-3.403	0.604	5.124	10.166	15.738	21.847	28.5	35.705	43.467
allylcyclopentane	3524-75-2		210.549	196.365	182.618	169.301	156.411	143.943	131.894	120.265	109.056	98.269	87.907	77.977	68.483	59.433	50.835	42.697	35.027	27.835	21.13	14.922	9.218	4.028	-0.641	-4.814	-8.453	-11.535	-14.057	-16.014	-17.403	-18.219	-18.459	-18.119	-17.196	-15.686	-13.586	-10.895	-7.608	-3.724	0.76	5.845	11.534	17.828	24.729	32.239	40.359	49.09	58.433
allylidenediacetate	869-29-4		-84.303	-82.846	-80.881	-78.421	-75.481	-72.079	-68.236	-63.978	-59.339	-54.357	-49.084	-43.586	-37.945	-32.266	-26.675	-21.326	-16.387	-12.033	-8.425	-5.683	-3.864	-2.951	-2.853	-4.58	-6.694	-8.643	-10.412	-11.979	-13.317	-14.399	-15.193	-15.671	-15.803	-15.561	-14.918	-13.851	-12.337	-10.357	-7.893	-4.929	-1.514	2.404	6.85	11.831	17.358	23.435	30.071
allylvinylether	3917-15-5		8.791	7.921	7.531	7.58	8.017	8.778	9.787	10.95	12.163	13.307	14.261	14.905	15.138	14.886	14.117	12.84	11.102	8.981	6.576	3.987	1.313	-1.356	-3.944	-6.766	-9.376	-11.604	-13.454	-14.928	-16.024	-16.739	-17.069	-17.008	-16.547	-15.676	-14.385	-12.662	-10.496	-7.872	-4.78	-1.206	2.84	7.384	12.44	18.018	24.127	30.778	37.978
alpha-methylacrolein	78-85-3		-180.711	-174.859	-168.485	-161.601	-154.222	-146.363	-138.043	-129.283	-120.107	-110.546	-100.638	-90.431	-79.992	-69.412	-58.815	-48.377	-38.333	-28.983	-20.679	-13.778	-8.557	-5.134	-3.419	-4.82	-6.976	-9.03	-10.939	-12.657	-14.136	-15.331	-16.2	-16.704	-16.811	-16.491	-15.718	-14.473	-12.738	-10.497	-7.739	-4.453	-0.66	3.665	8.534	13.951	19.921	26.448	33.536
alpha-methylstyrene	98-83-9		202.878	187.598	172.915	158.825	145.324	132.409	120.074	108.315	97.126	86.502	76.438	66.926	57.961	49.535	41.641	34.272	27.42	21.077	15.236	9.889	5.028	0.647	-3.26	-6.701	-9.679	-12.2	-14.267	-15.881	-17.045	-17.758	-18.018	-17.825	-17.175	-16.063	-14.484	-12.434	-9.905	-6.892	-3.386	0.619	5.131	10.156	15.703	21.778	28.387	35.538	43.237
alpha-methylcyclopropanemethanol	765-42-4		-314.539	-301.559	-287.994	-273.855	-259.153	-243.901	-228.116	-211.818	-195.03	-177.786	-160.127	-142.11	-123.818	-105.377	-86.984	-68.947	-51.746	-36.063	-22.743	-12.575	-5.943	-2.611	-1.843	-4.121	-6.879	-9.347	-11.488	-13.268	-14.655	-15.623	-16.146	-16.205	-15.783	-14.864	-13.437	-11.491	-9.019	-6.013	-2.469	1.617	5.775	10.054	14.345	18.374	21.759	23.998	24.527
amylpropionate	624-54-4		-166.612	-161.306	-155.485	-149.157	-142.331	-135.018	-127.229	-118.978	-110.284	-101.171	-91.673	-81.839	-71.741	-61.484	-51.224	-41.18	-31.654	-23.018	-15.683	-10.01	-6.201	-4.225	-3.827	-5.985	-8.613	-10.98	-13.044	-14.761	-16.096	-17.012	-17.48	-17.474	-16.972	-15.955	-14.408	-12.317	-9.671	-6.461	-2.68	1.678	6.619	12.147	18.265	24.977	32.284	40.19	48.696
amylvalerianate	2173-56-0		-153.9	-149.396	-144.338	-138.731	-132.583	-125.905	-118.708	-111.006	-102.818	-94.17	-85.099	-75.658	-65.928	-56.027	-46.128	-36.478	-27.404	-19.308	-12.607	-7.641	-4.557	-3.255	-3.423	-5.865	-8.661	-11.152	-13.295	-15.052	-16.389	-17.275	-17.684	-17.594	-16.985	-15.844	-14.155	-11.909	-9.096	-5.71	-1.744	2.807	7.946	13.677	20.003	26.926	34.447	42.569	51.292
arsenictrioxide	1327-53-3		-174.824	-170.502	-165.598	-160.116	-154.064	-147.451	-140.286	-132.583	-124.358	-115.634	-106.438	-96.81	-86.802	-76.488	-65.965	-55.374	-44.899	-34.784	-25.328	-16.869	-9.738	-4.186	-0.325	-0.571	-1.948	-3.312	-4.669	-6.014	-7.329	-8.586	-9.749	-10.776	-11.621	-12.237	-12.58	-12.608	-12.28	-11.561	-10.421	-8.832	-6.77	-4.215	-1.149	2.443	6.572	11.251	16.488
arsenictrichloride	7784-34-1		227.951	211.008	194.687	178.989	163.912	149.454	135.616	122.395	109.791	97.802	86.426	75.662	65.507	55.96	47.016	38.675	30.931	23.783	17.225	11.253	5.861	1.044	-3.204	-6.891	-10.024	-12.613	-14.667	-16.195	-17.21	-17.722	-17.744	-17.289	-16.369	-14.997	-13.187	-10.949	-8.294	-5.233	-1.772	2.081	6.325	10.957	15.98	21.396	27.211	33.435	40.075
b-butyrolactone	3068-88-0		-99.209	-97.716	-95.679	-93.11	-90.024	-86.436	-82.364	-77.83	-72.859	-67.484	-61.741	-55.682	-49.366	-42.873	-36.305	-29.788	-23.479	-17.561	-12.239	-7.713	-4.158	-1.683	-0.309	-1.449	-3.302	-5.168	-7.028	-8.848	-10.584	-12.188	-13.606	-14.786	-15.677	-16.234	-16.416	-16.186	-15.512	-14.369	-12.734	-10.588	-8.008	-4.923	-1.303	2.859	7.571	12.839	18.667
b-phenylethylacetate	103-45-7		-150.29	-144.825	-138.856	-132.394	-125.451	-118.043	-110.191	-101.918	-93.258	-84.256	-74.972	-65.492	-55.935	-46.463	-37.292	-28.696	-20.986	-14.478	-9.426	-5.953	-4.012	-3.407	-3.842	-5.977	-8.36	-10.489	-12.345	-13.907	-15.153	-16.061	-16.61	-16.78	-16.55	-15.902	-14.817	-13.28	-11.274	-8.786	-5.803	-2.313	1.692	6.222	11.289	16.9	23.061	29.781	37.065
bbr3	10294-33-4		249.543	231.913	214.896	198.492	182.699	167.518	152.946	138.984	125.63	112.883	100.743	89.208	78.277	67.949	58.223	49.097	40.571	32.642	25.31	18.573	12.429	6.877	1.916	-2.456	-6.242	-9.441	-12.058	-14.091	-15.545	-16.42	-16.717	-16.44	-15.588	-14.165	-12.171	-9.608	-6.477	-2.78	1.482	6.308	11.697	17.648	24.16	31.233	38.867	47.06	55.813
benzenemethanethiol	100-53-8		90.322	83.868	77.803	72.092	66.7	61.59	56.723	52.062	47.569	43.213	38.967	34.809	30.728	26.718	22.783	18.933	15.183	11.553	8.065	4.741	1.605	-1.324	-4.025	-6.713	-9.138	-11.207	-12.925	-14.296	-15.324	-16.009	-16.347	-16.335	-15.966	-15.231	-14.121	-12.624	-10.727	-8.418	-5.683	-2.509	0.92	4.715	8.913	13.516	18.52	23.922	29.717
benzenepropanol	122-97-4		-263.742	-250.977	-237.693	-223.904	-209.627	-194.882	-179.692	-164.088	-148.109	-131.811	-115.269	-98.601	-81.98	-65.675	-50.084	-35.759	-23.371	-13.569	-6.736	-2.814	-1.32	-1.575	-2.918	-5.496	-8.093	-10.348	-12.251	-13.79	-14.956	-15.735	-16.118	-16.092	-15.646	-14.769	-13.45	-11.68	-9.45	-6.751	-3.575	0.083	3.667	7.17	10.383	12.861	13.986	13.026	9.315
benzenepropanenitrile	645-59-0		-133.302	-128.374	-122.917	-116.946	-110.477	-103.531	-96.137	-88.33	-80.157	-71.683	-62.992	-54.2	-45.455	-36.951	-28.921	-21.627	-15.332	-10.253	-6.516	-4.122	-2.95	-2.793	-3.403	-5.297	-7.365	-9.228	-10.879	-12.305	-13.493	-14.426	-15.085	-15.451	-15.503	-15.22	-14.581	-13.565	-12.154	-10.328	-8.07	-5.364	-2.337	1.105	5.001	9.359	14.189	19.495	25.285
benzisoxazole	271-58-9		-229.609	-218.922	-207.739	-196.073	-183.941	-171.362	-158.357	-144.955	-131.192	-117.119	-102.81	-88.372	-73.966	-59.833	-46.312	-33.857	-22.997	-14.235	-7.889	-3.96	-2.134	-1.91	-2.759	-4.976	-7.292	-9.319	-11.05	-12.478	-13.597	-14.401	-14.884	-15.039	-14.86	-14.34	-13.473	-12.253	-10.671	-8.721	-6.394	-3.682	-1.062	1.686	4.625	7.729	10.973	14.333	17.79
benzofuran	271-89-6		182.171	168.757	155.808	143.324	131.306	119.756	108.675	98.066	87.931	78.272	69.09	60.388	52.166	44.424	37.163	30.38	24.075	18.244	12.884	7.991	3.559	-0.418	-3.946	-7.08	-9.783	-12.045	-13.876	-15.284	-16.278	-16.867	-17.056	-16.851	-16.255	-15.269	-13.895	-12.131	-9.974	-7.418	-4.459	-1.089	2.423	6.228	10.379	14.875	19.717	24.905	30.44
benzoicacidbutylester	136-60-7		-104.705	-102.164	-99.071	-95.431	-91.251	-86.541	-81.315	-75.59	-69.393	-62.764	-55.759	-48.458	-40.977	-33.478	-26.177	-19.345	-13.294	-8.334	-4.708	-2.524	-1.723	-2.096	-3.348	-6.031	-8.823	-11.27	-13.346	-15.031	-16.305	-17.15	-17.55	-17.492	-16.963	-15.953	-14.454	-12.455	-9.952	-6.936	-3.403	0.652	5.228	10.334	15.974	22.152	28.871	36.135	43.948
benzoicacidpropylester	2315-68-6		-109.888	-107.129	-103.831	-99.997	-95.635	-90.753	-85.364	-79.483	-73.138	-66.362	-59.209	-51.754	-44.107	-36.419	-28.897	-21.803	-15.444	-10.133	-6.127	-3.563	-2.409	-2.479	-3.488	-6.045	-8.757	-11.142	-13.176	-14.838	-16.107	-16.964	-17.393	-17.379	-16.908	-15.97	-14.553	-12.648	-10.248	-7.344	-3.93	0.001	4.447	9.417	14.919	20.956	27.533	34.653	42.322
benzoylchloride	98-88-4		152.394	141.675	131.346	121.395	111.808	102.573	93.68	85.12	76.887	68.976	61.384	54.11	47.157	40.526	34.223	28.253	22.622	17.337	12.405	7.833	3.628	-0.203	-3.655	-6.795	-9.547	-11.881	-13.799	-15.301	-16.39	-17.065	-17.327	-17.175	-16.609	-15.627	-14.228	-12.407	-10.163	-7.49	-4.383	-0.837	3.059	7.369	12.118	17.314	22.962	29.072	35.651
benzoylbromide	618-32-6		177.418	164.521	152.095	140.136	128.639	117.602	107.019	96.888	87.206	77.969	69.176	60.823	52.91	45.433	38.391	31.783	25.606	19.859	14.54	9.648	5.181	1.137	-2.487	-5.718	-8.533	-10.924	-12.895	-14.448	-15.587	-16.313	-16.628	-16.533	-16.027	-15.111	-13.783	-12.04	-9.879	-7.297	-4.288	-0.848	2.921	7.09	11.688	16.722	22.198	28.125	34.51
benzoylfluoride	455-32-3		63.241	58.189	53.566	49.343	45.492	41.977	38.76	35.796	33.038	30.437	27.941	25.498	23.064	20.598	18.07	15.463	12.774	10.013	7.202	4.375	1.571	-1.165	-3.788	-6.564	-9.13	-11.34	-13.193	-14.682	-15.803	-16.551	-16.919	-16.901	-16.488	-15.674	-14.451	-12.81	-10.743	-8.241	-5.296	-1.898	1.87	6.072	10.734	15.864	21.469	27.558	34.138
benzylfluoride	350-50-5		134.015	123.114	112.725	102.837	93.439	84.52	76.068	68.071	60.517	53.394	46.689	40.389	34.483	28.956	23.798	18.996	14.539	10.414	6.612	3.123	-0.063	-2.953	-5.553	-8.116	-10.419	-12.366	-13.966	-15.224	-16.146	-16.731	-16.977	-16.879	-16.429	-15.618	-14.433	-12.861	-10.886	-8.494	-5.667	-2.392	1.339	5.545	10.244	15.448	21.17	27.421	34.212
benzylmethylsulfide	766-92-7		39.249	36.153	33.502	31.262	29.39	27.836	26.541	25.436	24.448	23.496	22.498	21.378	20.069	18.521	16.708	14.627	12.299	9.766	7.084	4.316	1.529	-1.213	-3.851	-6.632	-9.192	-11.395	-13.241	-14.728	-15.852	-16.606	-16.984	-16.975	-16.569	-15.755	-14.52	-12.851	-10.735	-8.161	-5.115	-1.586	2.436	6.962	12.003	17.569	23.668	30.308	37.497
benzylmethylether	538-86-3		-249.39	-239.255	-228.549	-217.28	-205.459	-193.099	-180.217	-166.831	-152.967	-138.661	-123.962	-108.942	-93.715	-78.452	-63.418	-49.003	-35.743	-24.276	-15.211	-8.903	-5.295	-3.943	-4.216	-6.488	-8.998	-11.21	-13.107	-14.672	-15.886	-16.73	-17.188	-17.241	-16.873	-16.068	-14.811	-13.087	-10.882	-8.185	-4.984	-1.267	2.976	7.753	13.072	18.943	25.371	32.363	39.925
beta-propiolactone	57-57-8		-79.636	-79.112	-78.043	-76.441	-74.32	-71.697	-68.59	-65.021	-61.015	-56.605	-51.828	-46.731	-41.37	-35.819	-30.167	-24.521	-19.015	-13.802	-9.05	-4.933	-1.608	0.808	2.257	1.283	-0.428	-2.21	-4.061	-5.96	-7.871	-9.744	-11.524	-13.149	-14.558	-15.696	-16.508	-16.948	-16.975	-16.555	-15.656	-14.254	-12.487	-10.232	-7.442	-4.107	-0.217	4.238	9.263
bis(1,1-dimethylethyl)peroxide	110-05-4		-136.028	-131.744	-126.872	-121.421	-115.398	-108.818	-101.694	-94.05	-85.913	-77.325	-68.345	-59.057	-49.585	-40.109	-30.877	-22.219	-14.532	-8.229	-3.642	-0.914	0.051	-0.442	-1.983	-5.149	-8.395	-11.203	-13.553	-15.425	-16.8	-17.664	-18.002	-17.799	-17.047	-15.733	-13.851	-11.392	-8.349	-4.718	-0.493	4.33	9.754	15.783	22.42	29.666	37.525	45.997	55.084
bis(2-chloroethyl)ether	111-44-4		-140.426	-133.9	-126.793	-119.118	-110.896	-102.154	-92.929	-83.277	-73.277	-63.045	-52.744	-42.602	-32.919	-24.058	-16.407	-10.297	-5.917	-3.247	-2.073	-2.064	-2.862	-4.151	-5.683	-7.7	-9.598	-11.191	-12.496	-13.531	-14.308	-14.833	-15.111	-15.137	-14.905	-14.399	-13.605	-12.499	-11.061	-9.264	-7.084	-4.496	-1.627	1.639	5.354	9.536	14.203	19.371	25.051
bis(2-ethylhexyl)phosphate	298-07-7		-219.523	-210.9	-201.681	-191.872	-181.48	-170.513	-158.984	-146.907	-134.305	-121.209	-107.669	-93.758	-79.591	-65.353	-51.325	-37.929	-25.738	-15.428	-7.615	-2.616	-0.294	-0.127	-1.433	-4.441	-7.554	-10.278	-12.576	-14.418	-15.78	-16.64	-16.979	-16.783	-16.041	-14.742	-12.879	-10.446	-7.44	-3.856	0.306	5.048	10.148	15.521	20.912	25.746	28.909	28.525	22.265
bis(1,1-dimethylethyl)disulfide	110-06-5		154.289	144.447	134.925	125.702	116.758	108.076	99.64	91.439	83.463	75.708	68.172	60.857	53.769	46.916	40.311	33.967	27.9	22.128	16.67	11.543	6.767	2.361	-1.656	-5.361	-8.642	-11.452	-13.781	-15.622	-16.965	-17.803	-18.127	-17.928	-17.199	-15.933	-14.122	-11.76	-8.84	-5.357	-1.306	3.318	8.521	14.305	20.675	27.633	35.184	43.33	52.074
bis(trimethylsilyl)methane	2117-28-4		257.119	238.954	221.415	204.501	188.212	172.546	157.502	143.081	129.28	116.099	103.538	91.595	80.271	69.564	59.473	49.999	41.14	32.896	25.268	18.253	11.853	6.066	0.893	-3.666	-7.612	-10.945	-13.664	-15.769	-17.261	-18.138	-18.4	-18.047	-17.079	-15.495	-13.294	-10.476	-7.04	-2.985	1.69	6.985	12.902	19.441	26.603	34.389	42.801	51.838	61.503
bromoaceticacidmethylester	96-32-2		-76.489	-74.84	-72.678	-70.017	-66.874	-63.271	-59.234	-54.799	-50.009	-44.92	-39.605	-34.158	-28.694	-23.354	-18.301	-13.708	-9.745	-6.553	-4.219	-2.762	-2.131	-2.213	-2.862	-4.764	-6.827	-8.652	-10.239	-11.585	-12.685	-13.53	-14.111	-14.415	-14.428	-14.135	-13.519	-12.563	-11.249	-9.559	-7.477	-4.985	-2.548	0.105	3.066	6.336	9.917	13.808	18.014
bromocyclohexane	108-85-0		191.449	177.014	163.166	149.897	137.202	125.074	113.503	102.483	92.005	82.058	72.633	63.72	55.308	47.388	39.949	32.981	26.475	20.422	14.816	9.649	4.918	0.619	-3.249	-6.686	-9.69	-12.257	-14.382	-16.059	-17.279	-18.035	-18.318	-18.119	-17.427	-16.233	-14.528	-12.302	-9.548	-6.256	-2.419	1.971	6.919	12.431	18.514	25.172	32.409	40.23	48.638
bromotrichloromethane	75-62-7		252.403	234.401	217.027	200.279	184.158	168.661	153.79	139.542	125.917	112.914	100.532	88.771	77.628	67.104	57.196	47.903	39.224	31.158	23.703	16.857	10.618	4.985	-0.044	-4.472	-8.3	-11.532	-14.168	-16.213	-17.668	-18.537	-18.821	-18.524	-17.649	-16.198	-14.176	-11.584	-8.426	-4.705	-0.424	4.414	9.807	15.751	22.244	29.284	36.869	44.996	53.664
butadione	431-03-8		-84.377	-81.835	-79.114	-76.181	-73.01	-69.578	-65.873	-61.886	-57.623	-53.095	-48.327	-43.356	-38.235	-33.033	-27.839	-22.763	-17.937	-13.508	-9.629	-6.44	-4.052	-2.521	-1.839	-3.276	-5.262	-7.171	-8.985	-10.675	-12.205	-13.534	-14.619	-15.417	-15.885	-15.985	-15.683	-14.946	-13.747	-12.063	-9.874	-7.162	-3.954	-0.211	4.086	8.946	14.376	20.382	26.968
butanal	123-72-8		-180.023	-174.324	-168.089	-161.329	-154.059	-146.297	-138.06	-129.371	-120.256	-110.746	-100.881	-90.712	-80.307	-69.758	-59.192	-48.786	-38.774	-29.456	-21.183	-14.306	-9.1	-5.68	-3.953	-5.322	-7.439	-9.452	-11.316	-12.982	-14.404	-15.533	-16.327	-16.746	-16.756	-16.327	-15.434	-14.054	-12.171	-9.769	-6.836	-3.361	0.664	5.246	10.392	16.107	22.396	29.263	36.712
butanoicacid,anhydride	106-31-0		-86.067	-83.191	-80.015	-76.554	-72.818	-68.819	-64.567	-60.074	-55.355	-50.432	-45.333	-40.101	-34.795	-29.497	-24.312	-19.376	-14.846	-10.892	-7.674	-5.316	-3.881	-3.349	-3.623	-5.638	-7.99	-10.135	-12.04	-13.672	-14.994	-15.972	-16.575	-16.774	-16.541	-15.854	-14.694	-13.042	-10.884	-8.208	-5.003	-1.261	3.007	7.819	13.182	19.1	25.576	32.613	40.214
butanethiol	109-79-5		34.159	30.397	27.142	24.373	22.063	20.178	18.679	17.52	16.642	15.98	15.457	14.991	14.491	13.868	13.044	11.95	10.547	8.821	6.789	4.496	2.01	-0.589	-3.215	-6.236	-9.087	-11.549	-13.61	-15.257	-16.479	-17.263	-17.597	-17.47	-16.871	-15.79	-14.219	-12.149	-9.573	-6.486	-2.882	1.244	5.699	10.575	15.894	21.644	27.807	34.366	41.303
butanedioicacidethylmethylester	627-73-6		-116.95	-114.675	-111.886	-108.589	-104.787	-100.489	-95.705	-90.448	-84.736	-78.592	-72.048	-65.15	-57.958	-50.555	-43.055	-35.608	-28.405	-21.679	-15.686	-10.678	-6.85	-4.3	-2.995	-4.426	-6.527	-8.504	-10.33	-11.973	-13.394	-14.558	-15.425	-15.959	-16.127	-15.897	-15.241	-14.134	-12.554	-10.482	-7.902	-4.799	-1.177	2.985	7.7	12.974	18.814	25.226	32.216
butylbenzene	104-51-8		207.454	192.282	177.682	163.649	150.177	137.26	124.895	113.074	101.792	91.044	80.823	71.124	61.941	53.271	45.107	37.445	30.283	23.615	17.44	11.755	6.56	1.852	-2.367	-6.097	-9.337	-12.085	-14.339	-16.096	-17.353	-18.105	-18.349	-18.081	-17.297	-15.991	-14.161	-11.801	-8.906	-5.474	-1.499	3.022	8.093	13.718	19.901	26.644	33.951	41.826	50.27
butylbutyrate	109-21-7		-151.392	-147.312	-142.67	-137.473	-131.728	-125.443	-118.631	-111.303	-103.477	-95.178	-86.44	-77.312	-67.868	-58.215	-48.511	-38.978	-29.917	-21.702	-14.736	-9.374	-5.814	-4.024	-3.755	-5.968	-8.626	-11.015	-13.092	-14.816	-16.15	-17.061	-17.519	-17.499	-16.979	-15.941	-14.37	-12.253	-9.579	-6.34	-2.528	1.864	6.839	12.402	18.557	25.306	32.652	40.598	49.143
butylcyclohexane	1678-93-9		268.984	250.104	231.865	214.269	197.315	181.004	165.334	150.306	135.919	122.175	109.071	96.61	84.789	73.611	63.073	53.176	43.921	35.307	27.334	20.001	13.31	7.26	1.85	-2.918	-7.046	-10.533	-13.379	-15.585	-17.149	-18.073	-18.356	-17.999	-17	-15.36	-13.08	-10.159	-6.597	-2.393	2.451	7.936	14.062	20.83	28.239	36.289	44.98	54.313	64.287
butylformate	592-84-7		-129.121	-125.728	-121.81	-117.38	-112.449	-107.032	-101.145	-94.808	-88.046	-80.889	-73.377	-65.566	-57.528	-49.369	-41.227	-33.29	-25.796	-19.022	-13.259	-8.756	-5.66	-3.971	-3.538	-5.457	-7.855	-10.041	-11.98	-13.633	-14.965	-15.941	-16.531	-16.707	-16.445	-15.726	-14.533	-12.851	-10.669	-7.977	-4.77	-1.041	3.056	7.602	12.621	18.105	24.047	30.439	37.271
butylgylcidylether	2426-08-06		-211.377	-203.557	-195.203	-186.328	-176.947	-167.077	-156.74	-145.96	-134.768	-123.203	-111.314	-99.165	-86.843	-74.468	-62.207	-50.291	-39.023	-28.783	-19.987	-13.007	-8.061	-5.133	-3.971	-5.775	-8.186	-10.38	-12.322	-13.976	-15.307	-16.28	-16.864	-17.031	-16.754	-16.012	-14.785	-13.058	-10.815	-8.045	-4.739	-0.887	3.515	8.474	13.997	20.087	26.749	33.985	41.799
butylcyclopentane	2040-95-1		268.237	249.398	231.199	213.643	196.727	180.452	164.819	149.826	135.473	121.761	108.69	96.259	84.468	73.317	62.806	52.935	43.704	35.113	27.162	19.851	13.179	7.147	1.755	-2.998	-7.11	-10.583	-13.417	-15.61	-17.164	-18.077	-18.351	-17.985	-16.979	-15.333	-13.046	-10.119	-6.552	-2.344	2.504	7.993	14.122	20.893	28.305	36.357	45.052	54.387	64.364
butylhexanoate	626-82-4		-157.035	-152.172	-146.77	-140.837	-134.381	-127.413	-119.945	-111.991	-103.573	-94.715	-85.457	-75.852	-65.982	-55.967	-45.983	-36.277	-27.18	-19.09	-12.421	-7.503	-4.47	-3.212	-3.41	-5.856	-8.651	-11.14	-13.281	-15.037	-16.373	-17.258	-17.667	-17.576	-16.968	-15.826	-14.137	-11.891	-9.078	-5.69	-1.723	2.83	7.972	13.707	20.037	26.965	34.493	42.621	51.352
butyllactate	138-22-7		-256.02	-245.795	-235.006	-223.664	-211.784	-199.38	-186.474	-173.093	-159.269	-145.046	-130.48	-115.649	-100.657	-85.65	-70.835	-56.5	-43.029	-30.903	-20.637	-12.669	-7.201	-4.118	-3.026	-4.965	-7.499	-9.805	-11.842	-13.574	-14.963	-15.974	-16.578	-16.745	-16.452	-15.678	-14.404	-12.615	-10.299	-7.444	-4.042	-0.084	4.225	8.929	14.001	19.341	24.795	30.14	35.062
butyllaurate	106-18-3	3	-147.34	-142.28	-136.691	-130.58	-123.956	-116.828	-109.209	-101.114	-92.567	-83.6	-74.258	-64.612	-54.767	-44.882	-35.185	-25.99	-17.695	-10.737	-5.504	-2.205	-0.795	-0.986	-2.351	-5.349	-8.463	-11.188	-13.489	-15.337	-16.703	-17.566	-17.906	-17.707	-16.957	-15.644	-13.759	-11.296	-8.248	-4.611	-0.381	4.445	9.869	15.893	22.519	29.748	37.58	46.017	55.059
butylvinylether	111-34-2		-15.167	-15.124	-14.562	-13.513	-12.012	-10.105	-7.851	-5.32	-2.604	0.19	2.932	5.477	7.671	9.363	10.426	10.776	10.384	9.284	7.566	5.356	2.801	0.049	-2.765	-6.005	-9.048	-11.659	-13.83	-15.551	-16.812	-17.604	-17.917	-17.74	-17.066	-15.884	-14.187	-11.967	-9.215	-5.926	-2.093	2.29	7.218	12.701	18.746	25.356	32.534	40.284	48.608
butyloctanoate	589-75-3		-156.93	-151.876	-146.282	-140.156	-133.506	-126.342	-118.678	-110.529	-101.916	-92.866	-83.421	-73.638	-63.607	-53.457	-43.382	-33.651	-24.622	-16.717	-10.356	-5.848	-3.277	-2.469	-3.055	-5.699	-8.612	-11.189	-13.391	-15.181	-16.526	-17.4	-17.779	-17.642	-16.974	-15.76	-13.988	-11.65	-8.737	-5.244	-1.166	3.503	8.765	14.622	21.078	28.133	35.79	44.049	52.912
butyricacid	107-92-6		-109.915	-106.805	-103.225	-99.186	-94.701	-89.782	-84.446	-78.714	-72.612	-66.174	-59.446	-52.492	-45.396	-38.273	-31.271	-24.58	-18.42	-13.029	-8.625	-5.367	-3.31	-2.394	-2.453	-4.474	-6.838	-8.942	-10.757	-12.254	-13.406	-14.185	-14.568	-14.533	-14.06	-13.134	-11.741	-9.871	-7.515	-4.669	-1.33	2.503	5.809	8.265	9.032	6.642	-0.507	-13.278	-31.155
[truncated: 552 more rows]
[truncated: 16 more columns]

## Sheet: Nitrocellulose
COSMO_ID	Solvent	CAS	SCORE
[truncated: 104 more rows]

## Sheet: Ester Gum
COSMO_ID	CAS	SCORE
[truncated: 88 more rows]

[truncated: 2 more sheets: Triolein, green_solvents]
